# Supplementary material for: The “Neglected Viruses” of Taihu: Abundant Transcripts for Viruses Infecting Eukaryotes and Their Potential Role in Phytoplankton Succession
Source: Front Microbiol. 2020 Mar 6;11:338. doi: 10.3389/fmicb.2020.00338 (PMC7067694; doi:10.3389/fmicb.2020.00338)
Supplement: Supplementary file 4 [file Table_3.XLSX]

## Sheet: NCLDV
Supplementary Table 3. Raw transcript expression for viral candidates.
Name	Contig Length	T06_1	T06_2	T06_3	T06_4	T06_5	T06_7	T06_9	T07_1	T07_2	T07_3	T07_4	T07_5	T07_6	T07_8	T07_9	T08_1	T08_2	T08_4	T08_5	T08_8	T08_9	T09_1	T09_3I	T09_4	T09_5I	T09_6	T09_7	T09_8	T10_1	T10_2	T10_3I	T10_4	T10_6	T10_7I	T10_9
Library		22033842	24534622	23412238	24033944	27980378	13425780	17912022	13338200	21803172	22600242	26571748	22896412	25750650	28306452	29337992	25120262	23764324	22226606	20170794	21620630	23023364	25330788	22391750	24765564	24056566	24555732	23421504	26022064	32443414	24402058	23140306	30110592	25919334	40840684	15009046
>k141_8801	267	0	0	0	0	0	0	0	0	0	0	0	0	0	0	0	0	0	0	0	0	0	0	0	0	0	0	0	0	0	2	0	2	0	0	0
>k141_15517	240	2	0	0	0	0	0	2	0	0	0	2	0	0	0	3	0	0	0	0	0	2	0	0	0	0	0	0	0	1	0	0	0	0	0	0
>k141_27486	1557	0	0	0	0	0	0	0	6	0	0	4	0	0	0	0	0	0	0	0	0	0	0	0	0	0	0	0	0	22	56	8	168	2	0	0
>k141_54277	450	0	0	0	0	0	0	0	0	0	0	0	0	0	2	15	0	0	0	0	0	2	0	0	0	0	0	0	0	0	0	0	0	0	0	1
>k141_57462	1356	0	0	0	0	0	0	0	0	0	0	0	0	0	0	1	0	0	13	0	733	0	0	6	0	0	0	0	8	0	0	0	0	2	0	0
>k141_59552	516	0	0	0	0	0	0	0	2	0	0	0	1	0	0	0	0	0	0	0	0	0	2	0	0	0	0	0	0	2	0	0	13	0	0	0
>k141_64111	318	0	0	0	0	0	0	0	0	0	0	0	0	0	0	0	0	0	0	0	0	8	0	0	0	0	0	0	0	0	0	0	0	0	0	2
>k141_71951	441	0	1	0	0	0	0	0	0	0	0	0	0	0	0	0	0	0	0	0	0	0	1	0	0	0	0	0	0	14	0	0	10	0	0	0
>k141_75418	303	0	0	0	0	0	0	0	0	0	0	0	0	0	0	0	0	0	0	0	0	0	0	0	0	0	0	0	0	4	0	0	0	7	0	0
>k141_76030	303	0	0	0	0	0	0	0	0	0	0	0	0	0	0	2	0	0	0	0	0	7	0	0	0	0	0	0	2	0	0	0	0	0	0	0
>k141_77018	243	0	0	0	0	0	0	2	0	0	0	0	0	0	0	0	0	0	0	0	0	1	0	0	0	0	0	0	0	0	0	0	0	0	0	0
>k141_80041	441	0	0	0	0	0	0	0	0	0	0	0	0	0	0	1	0	0	0	0	0	0	0	0	0	0	0	0	0	9	0	0	0	0	0	2
>k141_82562	432	0	0	0	0	0	0	0	0	0	0	0	0	0	0	6	0	0	0	0	0	13	0	0	0	0	0	0	0	0	0	0	0	0	0	0
>k141_90629	753	4	0	0	0	0	0	3	0	0	8	3	0	0	0	12	0	0	1	0	0	5	2	2	8	0	0	0	0	4	1	0	2	0	0	3
>k141_93886	380	2	0	0	2	0	0	0	0	0	0	2	0	0	0	6	2	0	0	0	0	1	1	0	0	0	0	0	0	0	2	0	2	0	0	0
>k141_96852	630	0	0	0	0	0	0	0	0	0	0	0	0	0	0	0	0	0	0	0	0	3	1	4	0	0	0	0	0	10	0	0	3	0	0	0
>k141_100784	588	0	0	0	0	0	0	0	0	0	0	0	0	1	0	14	2	0	2	0	0	17	0	0	0	0	0	0	1	0	1	0	4	0	0	0
>k141_106984	561	0	0	0	0	0	0	0	0	0	0	0	0	0	0	5	0	0	0	0	0	16	0	0	0	0	0	0	0	0	0	0	0	0	0	0
>k141_113730	327	1	0	0	0	0	0	0	0	0	0	0	0	0	0	5	0	0	0	0	0	9	0	0	0	0	0	0	0	0	0	0	0	0	0	0
>k141_122401	336	0	0	0	0	0	0	0	0	0	0	0	0	2	0	3	0	0	0	0	0	4	0	0	2	0	0	0	0	0	0	0	0	0	0	0
>k141_132728	321	0	0	0	0	0	0	0	0	0	0	0	0	0	0	0	0	0	0	0	0	0	0	0	0	0	0	0	0	5	0	0	0	0	0	0
>k141_133516	192	0	0	0	0	0	0	0	0	0	0	0	0	0	0	0	0	0	0	0	0	0	0	0	0	0	0	0	0	0	0	0	0	4	0	0
>k141_135494	516	0	0	0	0	0	0	0	0	0	0	0	0	2	1	15	2	0	0	0	0	10	2	1	1	0	0	0	0	0	0	0	0	0	0	0
>k141_139389	270	0	0	0	0	0	0	0	0	0	0	0	0	0	0	3	0	0	0	0	0	2	0	0	0	0	0	0	0	0	0	0	0	2	0	2
>k141_148709	348	0	0	0	0	0	0	0	0	0	0	0	0	0	0	0	0	0	0	0	0	0	0	0	0	0	0	0	0	6	0	0	2	0	0	0
>k141_151414	321	0	0	0	0	0	0	0	0	0	0	0	0	0	0	8	0	0	0	0	0	0	2	1	0	0	0	0	0	0	0	0	4	0	0	0
>k141_152338	438	0	0	0	0	0	0	0	0	0	0	0	0	9	0	3	1	2	0	0	0	4	0	0	0	0	0	0	0	0	0	0	0	0	0	0
>k141_156473	700	0	0	0	0	0	0	0	0	0	0	0	0	4	0	2	0	0	0	0	0	27	0	0	0	0	0	0	0	0	0	0	0	2	0	0
>k141_158160	750	10	0	0	0	0	0	7	0	0	2	0	0	0	0	5	2	1	0	0	0	6	2	0	0	0	0	0	4	37	2	0	7	1	0	2
>k141_160186	366	6	0	0	2	0	0	0	0	0	0	0	0	0	0	0	0	0	0	0	0	0	0	0	0	0	0	0	0	0	0	0	0	0	0	0
>k141_161992	546	0	0	0	0	0	0	0	0	0	0	0	0	0	0	2	0	2	0	0	0	8	1	0	0	0	0	0	0	5	1	0	10	0	0	1
>k141_165344	495	9	0	0	1	0	0	0	0	0	0	0	0	0	0	0	0	0	0	0	0	0	0	0	0	0	0	0	0	2	0	0	0	0	0	0
>k141_167493	366	0	0	0	0	0	0	0	0	0	0	0	0	0	0	0	0	0	0	0	0	7	0	1	0	0	0	0	0	0	0	0	0	2	0	0
>k141_176205	438	0	0	0	0	0	0	0	0	0	0	0	0	0	0	3	0	0	0	0	0	2	0	0	0	0	0	0	0	0	2	0	2	0	0	0
>k141_176748	315	0	0	0	0	0	0	0	0	0	0	0	0	4	0	0	0	0	0	0	0	0	0	0	0	0	0	0	0	5	0	0	0	0	0	0
>k141_177893	246	0	0	0	0	0	0	0	0	0	0	0	0	0	0	1	0	0	0	0	0	0	0	0	0	0	0	0	0	0	0	0	6	0	0	0
>k141_180288	342	0	0	0	0	0	0	0	1	0	0	0	0	1	0	2	0	0	0	0	0	0	0	0	1	0	0	0	0	0	0	0	2	0	0	0
>k141_185580	183	0	0	0	0	0	0	0	0	0	0	0	0	0	0	0	0	0	0	0	0	0	0	0	0	0	0	0	0	2	0	0	0	0	0	0
>k141_202701	654	0	0	0	0	1	0	0	2	0	0	0	0	0	1	4	0	0	0	0	5	10	0	0	0	0	0	2	1	6	4	0	3	2	0	0
>k141_220177	372	0	0	0	0	0	0	0	0	0	0	0	0	0	0	0	0	0	0	1	0	0	0	0	0	0	0	0	4	0	0	0	0	0	0	0
>k141_229197	351	0	0	0	0	0	0	0	0	0	0	0	0	0	0	4	0	0	0	0	0	0	0	0	0	0	0	0	0	2	0	0	2	0	0	0
>k141_242309	1188	0	0	0	0	0	0	0	0	0	0	0	0	0	0	0	0	0	0	0	0	0	0	0	0	0	0	0	0	0	0	0	0	68	0	0
>k141_244232	345	0	0	0	0	0	0	0	0	0	0	0	0	2	0	14	0	0	0	0	0	5	0	0	0	0	0	0	0	0	0	0	0	0	0	0
>k141_258097	273	0	0	0	0	0	0	0	0	0	0	0	0	0	0	1	0	0	0	0	0	9	2	0	0	0	0	0	0	0	0	0	1	0	0	0
>k141_260420	339	0	0	0	0	0	0	0	0	0	0	0	0	0	0	2	0	0	0	0	0	2	0	0	0	0	0	0	0	12	0	0	0	0	0	0
>k141_261612	654	0	0	0	0	0	0	0	0	0	0	0	0	3	1	5	2	0	0	0	0	11	2	0	2	0	0	0	0	1	0	0	2	0	0	0
>k141_263377	393	0	0	0	0	0	0	0	0	0	0	0	0	0	0	2	0	0	0	0	0	12	1	0	0	0	0	0	0	0	0	0	0	0	0	0
>k141_263923	345	0	0	0	0	0	0	0	0	0	0	0	0	0	0	0	0	0	0	0	0	0	0	0	0	0	0	0	0	0	0	0	0	6	0	0
>k141_264638	405	0	0	0	0	0	0	0	0	0	0	0	0	0	0	0	0	2	0	0	0	6	21	0	2	0	0	0	0	0	0	0	0	0	0	0
>k141_265632	1746	0	0	0	0	0	0	0	6	0	22	230	0	0	0	0	0	0	0	0	0	0	0	0	0	0	0	0	0	0	0	0	0	0	0	0
>k141_267349	717	0	0	0	0	0	0	0	0	0	0	0	0	0	0	6	0	0	0	0	0	42	0	0	0	0	0	0	0	0	0	0	0	0	0	0
>k141_273588	273	0	0	0	0	0	0	0	0	0	0	0	2	0	0	0	0	0	0	0	0	0	5	0	0	0	0	0	0	0	0	0	0	0	0	0
>k141_277038	432	0	0	0	0	0	2	3	0	0	0	0	0	0	0	5	0	0	0	0	0	0	2	0	1	0	0	0	0	5	2	0	1	0	0	0
>k141_303592	321	0	0	0	0	0	0	0	0	0	0	0	0	0	0	0	4	0	0	0	0	0	2	0	0	0	0	0	0	2	0	0	0	0	0	0
>k141_308095	318	2	0	0	0	0	0	0	0	0	0	2	0	0	0	6	1	0	0	0	3	4	0	0	0	0	0	0	3	1	0	0	0	0	0	0
>k141_313978	387	0	0	0	0	0	0	0	0	0	0	0	0	1	0	1	0	0	0	0	0	0	0	0	0	0	0	0	0	0	0	0	12	0	0	0
>k141_314013	453	0	0	0	0	0	0	0	0	0	0	0	2	6	0	0	0	0	0	0	0	0	0	0	0	0	0	0	0	1	0	0	13	0	0	0
>k141_321693	858	22	0	0	0	0	0	4	0	0	0	2	0	0	0	0	0	0	0	0	0	11	0	0	0	0	0	0	0	0	0	0	0	0	0	0
>k141_327388	327	0	0	0	0	0	0	0	0	0	0	0	0	0	0	0	0	0	0	0	0	4	0	0	0	0	0	0	0	0	0	0	0	3	0	2
>k141_337601	354	0	0	0	0	0	0	0	0	0	0	0	0	0	0	0	0	2	2	0	0	1	0	0	0	0	0	0	0	0	0	0	4	0	0	0
>k141_338583	822	0	0	0	0	0	0	0	0	0	0	0	0	0	0	8	0	0	0	0	0	6	0	0	0	0	0	1	2	0	0	0	0	32	0	1
>k141_342074	297	0	0	0	0	0	0	0	0	0	0	0	0	2	2	5	0	0	0	0	0	9	0	1	0	0	0	0	0	0	0	0	2	0	0	0
>k141_345602	587	7	0	0	0	0	0	0	0	0	0	0	0	0	0	0	0	0	0	0	0	0	0	0	0	0	0	0	0	0	0	0	0	1	0	4
>k141_355430	345	0	0	0	0	0	0	0	0	0	0	0	0	0	0	0	0	0	0	0	0	0	0	0	0	3	0	0	0	0	0	0	0	0	3	2
>k141_355907	384	1	0	0	0	0	0	0	0	0	0	0	0	2	0	8	0	0	0	0	0	7	0	0	0	0	0	0	0	1	0	0	0	0	0	0
>k141_356611	492	1	0	0	0	0	0	0	0	0	0	0	0	0	1	6	0	0	0	0	5	7	0	0	0	0	0	0	0	0	0	0	0	0	0	0
>k141_357060	375	8	0	0	0	0	0	2	0	0	2	0	0	2	2	10	0	0	0	0	0	26	2	0	0	0	0	0	0	0	1	0	1	0	0	0
>k141_360676	537	1	0	2	0	0	0	0	0	0	6	2	0	1	0	6	1	3	0	1	0	18	7	0	1	0	0	0	1	5	0	0	4	1	0	0
>k141_364256	267	0	0	0	0	0	0	0	0	0	0	0	0	0	0	0	0	0	0	0	0	0	0	0	0	0	0	0	0	9	0	0	0	0	0	0
>k141_364740	573	2	0	0	0	0	0	0	0	0	1	0	8	0	1	3	2	0	0	0	1	16	2	0	0	0	0	0	0	2	0	0	1	2	0	2
>k141_366394	645	0	0	0	0	0	0	0	0	0	0	0	0	0	0	0	0	0	0	0	0	0	34	0	0	0	0	0	0	0	0	0	0	0	0	0
>k141_371648	303	0	0	0	0	0	0	0	0	0	0	0	0	0	0	0	0	0	0	0	0	7	0	0	0	0	0	0	0	0	0	0	0	0	0	0
>k141_383057	459	0	0	0	0	0	0	0	0	0	0	9	0	0	0	1	0	0	0	0	0	3	0	0	0	0	0	0	0	1	0	0	2	0	0	0
>k141_395917	351	0	0	0	0	0	0	0	0	0	0	0	0	0	0	2	0	2	0	0	0	2	2	0	1	0	0	0	0	0	0	0	0	0	0	0
>k141_396017	282	0	0	0	0	0	0	0	0	0	0	0	0	0	0	0	1	0	0	0	0	0	0	0	0	0	0	0	0	0	2	0	7	0	0	0
>k141_399385	537	0	0	0	0	0	0	0	0	0	0	0	0	0	0	11	0	0	0	0	0	6	0	0	0	0	0	0	0	0	0	0	0	2	0	0
>k141_402355	552	0	0	0	0	0	0	0	0	0	0	0	0	0	0	5	0	0	0	0	0	0	0	0	0	0	0	0	0	4	0	0	0	10	0	1
>k141_403496	384	0	0	0	0	0	0	0	0	0	0	0	0	6	1	2	2	0	4	0	0	3	2	0	1	0	0	0	0	0	0	0	0	2	0	0
>k141_404179	444	0	0	0	0	0	0	0	0	0	0	0	0	4	0	2	0	0	0	0	0	2	0	0	0	0	0	0	0	0	0	0	0	0	0	0
>k141_405017	456	0	0	0	0	0	0	0	0	0	0	0	0	0	0	0	0	0	0	0	0	0	4	0	0	0	0	0	0	4	2	0	1	0	0	0
>k141_406888	372	0	0	0	0	0	0	0	0	0	4	0	0	0	0	2	2	0	1	0	0	4	2	0	0	0	0	0	0	2	0	0	0	0	0	0
>k141_427197	171	2	0	0	0	0	0	0	0	0	0	0	0	0	0	0	0	0	0	0	0	0	0	0	0	0	0	0	0	0	0	0	0	0	0	0
>k141_432667	381	0	0	0	0	0	0	0	0	0	0	0	0	0	0	3	0	0	0	0	0	2	2	0	0	0	0	0	0	2	0	0	0	0	0	0
>k141_433519	393	3	0	0	0	0	0	0	0	0	0	0	0	0	0	0	0	0	0	0	0	8	0	0	0	0	0	0	0	0	0	0	0	0	0	0
>k141_433732	1071	0	0	0	0	0	0	0	0	0	0	0	0	3	0	11	2	0	1	0	0	1	10	0	0	0	0	0	0	5	2	0	0	0	0	2
>k141_446411	630	0	0	0	0	0	0	0	0	0	0	0	0	0	0	0	0	0	0	0	0	0	0	0	0	0	0	0	0	11	0	0	2	0	0	0
>k141_447200	342	0	0	0	0	0	0	0	0	0	2	4	0	0	0	4	0	0	0	0	0	4	0	0	0	0	0	0	0	0	0	0	0	0	0	2
>k141_447946	267	0	0	0	0	0	0	0	0	0	0	0	0	0	0	0	0	0	0	0	0	0	0	0	0	0	0	0	0	0	0	0	0	9	0	0
>k141_456434	261	0	0	0	0	0	0	0	0	0	0	0	0	0	0	2	0	0	0	0	0	0	0	0	0	0	0	0	0	6	0	0	0	0	0	0
>k141_459205	531	1	2	0	0	0	0	0	0	0	0	0	0	0	0	15	2	0	2	0	0	12	0	0	4	0	0	0	1	0	1	0	2	4	0	0
>k141_462728	642	0	0	0	0	0	0	0	0	0	4	0	0	0	0	4	0	2	0	0	0	0	0	0	0	0	0	0	0	0	0	0	3	4	0	2
>k141_474769	408	0	0	0	0	0	0	0	0	0	4	2	0	1	0	10	2	0	1	0	0	5	2	0	0	0	0	0	0	0	0	0	1	0	0	0
>k141_475471	360	0	0	0	0	1	0	0	0	0	0	1	0	0	0	6	2	0	0	0	0	3	0	0	0	0	1	0	2	6	0	0	0	0	0	2
>k141_480069	354	0	0	0	0	0	0	0	0	0	0	0	0	0	0	0	0	0	0	0	0	0	0	0	0	0	0	0	0	7	0	0	5	0	0	0
>k141_483212	297	0	0	0	0	0	0	0	0	0	0	2	0	0	0	2	2	0	2	0	0	3	0	0	0	0	0	0	0	0	0	0	0	0	0	0
>k141_493472	288	2	0	0	0	0	0	0	0	0	0	0	0	0	0	0	0	0	2	0	0	0	6	0	2	0	0	0	2	0	0	0	0	0	0	0
>k141_494340	672	1	0	0	0	0	0	4	0	0	2	0	0	0	0	21	3	0	0	0	7	33	8	3	0	0	0	0	1	0	3	0	5	0	0	0
>k141_494915	207	0	0	0	0	0	0	0	0	0	0	0	0	0	0	0	0	0	0	0	0	0	2	0	1	0	0	0	0	0	2	0	3	0	0	0
>k141_495243	306	0	0	0	0	0	0	0	0	0	0	0	0	0	0	0	0	0	0	0	0	0	12	0	0	0	0	0	0	0	0	0	0	0	0	0
>k141_496244	309	0	0	0	2	0	0	0	0	0	0	0	0	0	0	6	0	0	0	0	0	0	0	0	0	0	0	0	0	0	0	0	0	0	0	2
>k141_496768	711	0	0	0	0	0	0	0	0	0	0	0	0	0	0	13	0	0	0	0	0	10	0	0	0	0	0	0	0	0	0	0	0	0	0	0
>k141_497682	408	6	0	0	0	0	0	0	0	0	0	0	0	0	0	0	0	0	0	0	0	0	0	0	0	0	0	0	0	0	0	0	0	0	0	0
>k141_498641	567	0	0	0	0	0	0	0	0	0	0	4	0	0	2	6	0	0	0	0	0	4	0	0	0	0	0	0	0	0	0	0	0	0	0	0
>k141_500858	282	0	0	0	0	0	0	0	0	0	0	0	0	0	0	2	0	0	0	0	0	2	0	0	0	0	0	0	0	1	0	0	0	1	0	0
>k141_502591	510	0	0	0	0	0	0	0	0	0	0	0	0	0	0	16	0	0	0	0	0	3	0	0	0	0	0	0	0	0	0	0	0	0	0	0
>k141_503563	1086	0	0	0	0	0	0	0	0	0	2	2	0	0	0	1	0	0	0	0	0	2	2	0	0	0	0	0	0	31	0	0	4	0	0	0
>k141_503864	507	0	0	0	0	0	0	0	0	0	0	0	0	6	0	9	0	0	0	0	0	6	4	0	0	0	0	0	2	0	0	0	0	4	0	0
>k141_504910	300	0	0	0	0	0	0	0	0	0	0	0	0	0	0	0	0	0	0	0	0	0	0	0	0	0	0	0	0	3	0	0	0	0	0	0
>k141_505064	1083	0	0	0	0	0	0	0	0	0	0	0	0	0	0	0	0	0	0	0	0	0	0	0	0	0	0	0	0	11	0	0	0	55	0	11
>k141_506646	360	0	0	0	0	0	0	0	0	0	0	0	0	1	0	0	0	0	0	0	0	10	0	0	0	0	0	0	0	2	0	0	2	0	0	0
>k141_507712	558	0	0	0	0	0	0	0	0	0	0	0	0	0	0	0	0	0	0	0	0	0	0	0	0	0	0	0	0	10	0	0	18	0	0	0
>k141_507779	657	0	0	0	0	0	0	0	0	0	0	0	0	0	0	0	0	0	0	0	0	0	22	2	0	0	0	0	0	0	0	0	0	0	0	0
>k141_508648	570	13	0	0	0	0	0	0	0	0	2	0	0	0	0	4	0	0	0	0	0	0	0	0	0	0	0	0	0	0	0	0	0	10	0	4
>k141_510364	183	0	0	0	0	0	0	0	0	0	0	0	0	0	1	1	0	0	0	0	0	0	0	0	0	0	0	0	0	0	0	0	0	0	0	0
>k141_510425	516	0	0	0	0	0	0	0	0	0	0	2	0	0	0	0	0	0	0	0	0	0	0	1	0	0	0	0	0	5	0	0	8	0	0	0
>k141_514832	987	0	0	0	0	0	0	0	0	0	4	0	0	0	0	0	0	0	1	0	0	6	2	0	0	0	0	0	0	16	0	0	6	0	0	0
>k141_518066	213	0	0	0	0	0	0	0	0	0	0	0	0	0	0	0	0	0	0	0	0	4	0	0	0	0	0	0	0	0	0	0	0	0	0	0
>k141_518668	1509	0	2	0	0	0	0	1	0	0	0	0	0	6	8	71	2	2	0	0	0	69	1	5	4	0	0	0	3	2	2	0	4	2	0	0
>k141_521180	1758	8	0	0	2	0	0	21	0	0	4	26	2	0	0	0	0	0	0	0	0	0	0	0	0	0	0	0	0	88	4	0	111	2	0	0
>k141_527718	576	8	1	0	0	0	0	2	0	0	0	0	0	0	0	0	0	0	0	0	0	0	0	0	0	0	0	0	0	0	0	0	0	1	0	0
>k141_534509	726	0	0	0	0	0	0	0	0	0	2	2	0	0	0	0	0	0	0	0	0	0	0	2	2	0	0	0	0	25	0	0	8	0	0	0
>k141_542623	471	0	0	0	0	0	0	0	0	0	0	0	0	0	0	1	1	2	2	0	0	0	0	0	2	0	0	0	0	0	0	0	0	0	0	0
>k141_543123	502	0	0	0	0	0	0	0	0	0	1	0	0	2	0	4	0	0	0	0	0	6	0	0	0	0	0	0	0	0	0	0	1	5	0	6
>k141_544369	312	0	2	0	0	0	0	0	0	0	0	0	0	2	0	0	0	0	0	0	0	0	0	0	0	0	0	0	0	3	0	0	0	0	0	2
>k141_544723	816	5	0	0	0	0	0	0	0	0	4	0	0	0	6	11	0	0	0	0	0	6	0	0	0	0	0	0	0	0	0	0	0	6	0	2
>k141_549110	453	0	0	0	0	0	0	0	0	0	0	0	0	0	0	6	0	0	0	0	0	20	0	0	0	0	0	0	0	0	0	0	0	0	0	0
>k141_562877	315	0	1	0	0	0	0	0	0	0	0	0	0	0	0	7	0	0	0	0	2	2	0	2	0	0	0	0	0	0	1	0	0	0	0	0
>k141_568987	405	0	0	0	0	0	0	0	0	0	0	0	0	0	0	0	0	0	0	0	0	0	0	0	0	0	0	0	0	0	0	0	0	11	0	0
>k141_573321	507	6	0	2	2	0	0	0	0	0	0	0	0	0	0	0	0	0	0	0	0	0	0	0	0	0	0	0	0	0	0	0	0	0	0	0
>k141_574936	198	0	0	0	0	0	0	0	0	0	0	0	0	0	0	0	0	0	0	0	0	0	0	0	0	0	0	0	0	1	0	0	0	0	0	0
>k141_576752	903	0	0	0	0	0	0	0	0	0	0	0	0	0	0	0	0	0	0	0	0	0	4	9	5	0	0	0	0	2	0	0	2	0	0	0
>k141_577864	288	0	0	0	0	0	0	0	0	0	0	0	0	0	0	7	0	0	0	0	0	1	0	0	0	0	0	0	0	0	0	0	1	0	0	0
>k141_578568	1614	0	0	0	0	0	0	0	0	0	0	0	0	0	0	208	0	0	0	0	0	1	0	0	0	0	0	0	0	1	0	0	0	1	0	2
>k141_579333	594	0	0	0	0	0	0	0	0	0	0	0	0	0	0	0	0	0	0	0	0	0	0	0	0	0	0	0	0	0	6	0	13	0	0	0
>k141_582241	576	1	0	0	0	1	0	0	2	0	4	0	3	0	0	9	0	0	0	0	0	0	0	0	0	0	0	0	0	0	0	0	0	0	0	0
>k141_586297	348	0	1	0	0	0	0	0	0	0	0	0	0	0	0	7	0	0	0	0	0	5	0	0	0	0	0	0	1	0	0	0	0	1	0	0
>k141_586377	552	0	0	0	0	0	0	0	0	0	0	0	0	0	0	0	0	0	0	0	0	0	0	0	0	0	0	0	0	4	0	0	12	0	0	0
>k141_586950	399	13	0	0	2	0	0	4	0	0	0	0	0	0	0	3	2	0	0	0	0	2	0	0	0	0	0	0	0	0	0	0	0	0	0	2
>k141_590899	315	0	0	0	0	0	0	0	0	0	0	0	0	0	0	0	0	0	0	0	0	0	0	0	0	0	0	0	0	3	0	0	0	2	0	3
>k141_591048	414	0	0	0	0	0	0	2	0	0	0	0	0	0	2	6	0	0	0	0	0	2	1	0	0	0	0	0	1	0	0	0	0	0	0	0
>k141_591765	255	0	0	0	0	0	0	0	0	0	0	0	0	0	0	0	0	0	0	0	0	0	5	0	0	0	0	0	0	0	0	0	0	0	0	0
>k141_592154	492	0	0	0	0	0	0	0	0	0	0	0	0	0	0	11	0	0	0	0	0	0	0	0	0	0	0	0	0	1	0	0	0	0	0	2
>k141_594779	342	1	0	0	0	0	0	0	0	0	0	0	0	1	0	8	0	0	0	0	0	7	0	0	0	0	0	1	0	0	0	0	0	0	0	0
>k141_596672	441	0	0	0	0	0	0	0	0	0	0	0	0	0	0	0	0	0	0	0	0	12	0	0	0	0	0	0	0	0	0	0	0	0	0	0
>k141_596757	366	0	0	0	0	0	0	0	0	0	0	0	0	0	0	0	0	0	0	0	0	0	0	0	0	0	0	0	0	13	0	0	0	0	0	0
>k141_599154	330	0	0	0	0	0	0	0	0	0	0	0	0	0	0	3	0	0	0	0	0	2	0	0	8	0	0	0	0	0	0	0	0	0	0	0
>k141_600386	240	0	0	0	2	0	0	2	0	0	0	0	0	0	0	0	0	0	0	0	0	0	1	0	2	0	0	0	0	0	0	0	0	0	0	0
>k141_600974	318	0	0	0	0	0	0	0	0	0	0	0	0	0	0	1	0	0	0	0	0	0	0	0	0	0	0	0	0	2	0	0	0	5	0	0
>k141_603533	303	0	0	0	0	0	0	0	0	0	0	0	0	1	0	5	0	0	0	0	0	0	0	0	0	0	0	0	0	0	0	0	0	20	0	2
>k141_606854	819	0	0	0	0	0	0	0	0	0	0	0	0	2	0	9	0	0	0	0	0	27	0	0	0	0	0	0	0	0	0	0	0	0	0	0
>k141_610370	267	0	2	0	0	0	0	0	0	0	0	0	0	0	0	0	0	0	0	0	0	0	0	0	0	0	0	0	0	2	0	0	2	0	0	0
>k141_612434	642	0	0	0	0	0	0	0	0	0	0	0	0	0	0	0	0	0	0	0	0	0	0	0	0	0	0	0	0	21	0	0	7	0	0	0
>k141_612850	219	0	0	0	0	0	0	0	0	0	0	0	0	0	0	0	0	0	0	0	0	7	0	0	0	0	0	0	0	0	0	0	0	2	0	0
>k141_615880	321	1	0	0	1	0	0	2	0	0	0	1	0	0	0	8	0	0	0	0	0	13	0	0	0	0	0	0	1	0	3	0	0	0	0	0
>k141_622735	489	0	0	0	0	0	0	0	0	0	0	0	0	0	0	3	0	0	0	0	0	1	1	0	0	0	0	0	0	11	0	0	0	0	0	0
>k141_622964	309	0	0	0	0	0	0	0	0	0	0	0	0	0	0	3	0	0	1	0	0	3	0	0	0	0	0	0	0	0	0	0	1	1	0	2
>k141_627073	318	0	0	0	0	0	0	0	0	0	0	0	0	0	0	0	0	0	0	0	0	4	4	0	0	0	0	0	0	0	2	0	0	0	0	0
>k141_628715	1533	8	0	0	0	0	0	0	0	0	12	2	6	16	2	73	0	0	0	0	0	24	0	0	0	0	0	0	0	2	0	0	0	2	0	2
>k141_630178	468	0	0	0	0	0	0	3	0	0	0	5	0	0	1	0	0	1	0	0	0	2	0	0	0	0	0	0	0	0	0	0	0	5	0	1
>k141_630180	816	6	0	0	3	0	0	1	0	0	0	2	0	0	1	10	0	0	0	0	0	14	5	0	0	0	0	0	0	0	0	0	0	0	0	0
>k141_633414	411	0	0	0	0	0	0	0	0	0	0	0	0	0	0	2	0	0	0	0	0	2	0	0	0	0	0	0	0	1	0	0	5	0	0	0
>k141_634779	333	0	0	0	0	0	0	0	0	0	0	0	0	0	0	0	0	0	0	0	0	0	1	0	0	0	0	0	0	2	0	0	0	0	0	1
>k141_637418	384	0	0	0	0	0	0	0	0	0	0	0	0	0	0	0	0	0	0	0	0	0	0	10	1	0	0	0	0	2	0	0	2	0	0	0
>k141_639164	315	0	0	0	0	0	0	0	0	0	0	0	0	2	0	1	0	0	0	0	0	11	0	0	0	0	0	0	0	1	0	0	0	0	0	0
>k141_641540	753	4	0	0	2	0	0	0	0	0	0	0	0	0	0	0	0	0	0	0	0	0	0	0	0	0	0	0	0	0	0	0	0	16	0	2
>k141_646573	375	0	0	0	0	0	0	0	0	0	0	2	0	0	0	0	0	0	0	0	0	0	0	0	0	0	0	0	0	7	0	0	8	0	0	0
>k141_648415	981	0	0	0	0	0	0	0	0	0	0	0	0	0	0	0	0	0	0	0	0	0	11	4	0	0	0	0	0	14	0	0	9	0	0	0
>k141_649953	363	2	0	0	0	0	0	0	0	0	0	0	0	0	0	4	0	0	0	0	0	7	0	0	0	0	0	0	0	0	0	0	0	0	0	0
>k141_651721	624	0	0	0	0	0	0	0	0	0	0	0	0	2	0	2	0	0	0	0	0	17	0	0	0	0	0	0	0	0	0	0	0	0	0	0
>k141_651856	321	0	0	0	0	0	0	0	0	0	0	0	0	2	2	6	0	0	0	0	0	9	0	0	1	0	0	0	0	0	0	0	0	0	0	0
>k141_654253	525	12	0	0	0	0	0	4	0	0	0	0	0	4	0	9	0	0	0	0	0	3	0	0	0	0	0	0	0	0	0	0	1	0	0	0
>k141_659221	606	3	0	0	0	0	0	0	0	0	0	0	0	0	0	0	0	0	0	0	0	0	8	0	0	0	0	0	0	3	0	0	1	6	0	0
>k141_668192	756	23	3	0	5	0	2	3	0	0	1	0	0	2	2	10	3	0	3	0	0	33	3	0	2	0	0	1	2	51	2	0	10	1	0	2
>k141_670884	333	0	0	0	0	0	0	0	0	0	0	1	0	2	0	2	0	0	0	0	0	0	0	0	0	0	0	0	0	0	0	0	4	3	0	5
>k141_683557	312	4	0	0	1	0	0	0	0	0	0	0	0	0	0	0	0	0	0	0	0	0	1	0	0	0	0	0	0	0	0	0	0	0	0	0
>k141_685098	372	0	0	0	0	0	0	0	0	0	0	0	0	0	0	1	0	0	0	0	0	11	0	0	0	0	0	0	0	0	0	0	0	0	0	0
>k141_691504	324	0	0	0	0	0	0	0	0	0	0	0	0	0	0	0	0	0	0	0	0	0	0	0	0	0	0	0	0	0	0	0	0	6	0	0
>k141_691822	324	0	0	0	0	0	0	0	0	0	0	0	0	0	0	6	0	0	0	0	5	3	2	0	0	0	0	0	0	0	2	0	0	0	0	0
>k141_692502	603	0	0	0	0	0	0	0	4	0	0	2	0	0	0	4	4	2	0	0	0	12	10	0	14	0	0	0	0	2	0	0	4	0	0	0
>k141_694407	399	2	0	0	0	0	0	0	0	0	5	0	0	2	0	2	0	0	0	0	0	1	0	0	0	0	0	0	0	4	0	3	0	0	0	0
>k141_694621	336	1	0	0	0	0	0	0	0	0	0	0	0	0	0	0	0	0	0	0	0	0	0	0	0	0	0	0	0	2	0	0	0	2	0	1
>k141_696908	567	2	0	0	0	0	0	0	0	0	0	0	0	0	0	0	0	0	0	0	0	0	0	0	0	0	0	2	0	4	0	0	6	0	0	0
>k141_698718	255	0	0	0	0	0	0	0	0	0	2	0	0	0	0	2	0	0	0	0	0	1	0	0	0	0	0	0	0	3	0	0	0	0	0	0
>k141_703386	471	1	0	0	0	0	0	0	0	0	0	0	0	0	0	7	0	0	0	0	0	14	0	0	0	0	0	0	0	0	0	0	0	0	0	0
>k141_704656	354	0	0	0	0	0	0	0	0	0	0	0	0	0	0	4	0	0	0	0	0	10	0	0	0	0	0	0	0	0	0	0	0	0	0	0
>k141_706265	612	14	0	0	0	0	0	4	0	0	3	3	0	0	0	11	0	0	0	0	0	14	0	0	0	0	0	2	1	0	4	0	4	0	0	0
>k141_706366	537	8	0	2	2	0	0	0	0	0	0	0	0	0	0	0	0	0	0	0	0	0	0	0	0	0	0	0	0	0	0	0	0	0	0	0
>k141_706797	1560	0	0	0	0	0	0	0	0	0	0	0	0	0	0	4	0	0	0	0	0	0	97	0	2	0	0	0	0	0	0	0	0	0	0	0
>k141_710855	324	2	0	0	0	0	0	0	0	0	0	0	0	0	0	0	0	0	0	0	0	0	0	0	0	0	0	0	0	3	0	0	0	8	0	0
>k141_711426	396	2	0	0	0	0	0	0	0	0	0	0	0	0	0	6	1	0	0	0	0	3	1	2	0	0	0	0	1	1	0	0	0	2	0	2
>k141_712306	528	0	0	0	0	0	0	0	0	0	0	0	0	1	0	11	2	0	0	0	0	11	2	0	0	0	0	0	0	0	2	0	0	0	0	0
>k141_713705	288	0	0	0	0	0	0	0	0	0	0	0	0	0	0	2	0	0	0	0	0	15	5	0	0	0	0	0	0	0	0	0	0	0	0	0
>k141_718283	633	2	0	0	0	0	0	0	0	0	0	4	0	0	0	4	0	0	0	0	0	3	0	1	2	0	0	2	0	0	2	0	0	0	0	2
>k141_719142	306	0	0	0	0	0	0	0	0	0	4	0	0	0	0	0	0	0	0	0	0	0	0	0	0	0	0	0	0	2	0	0	1	0	0	0
>k141_721142	420	0	0	0	0	0	0	0	0	0	0	0	0	0	0	0	0	0	0	0	0	0	0	0	0	0	0	0	0	0	0	0	0	0	0	0
>k141_721722	354	0	0	0	0	0	0	1	0	0	0	0	0	0	0	4	0	0	0	0	0	0	0	0	0	0	0	0	0	0	0	0	0	0	0	0
>k141_723314	381	12	0	0	0	0	0	0	0	0	0	1	0	0	0	1	0	0	0	0	0	0	0	0	0	0	0	0	0	4	0	0	2	8	0	0
>k141_724445	597	0	0	0	0	0	0	0	0	0	0	0	0	4	0	6	0	0	0	0	1	3	0	0	0	0	0	0	0	1	0	0	1	3	0	0
>k141_726410	378	0	0	0	0	0	0	0	0	0	0	0	0	0	0	4	0	0	0	0	0	6	0	0	0	0	0	2	0	0	0	0	0	0	0	0
>k141_726837	294	0	0	0	0	0	0	0	0	0	0	0	0	2	0	5	1	0	7	0	0	3	0	0	1	0	0	0	3	0	2	0	0	2	0	0
>k141_730297	555	0	0	0	0	0	0	0	0	0	0	0	0	0	0	0	0	2	0	0	0	12	0	0	0	0	0	0	0	0	0	0	0	0	0	0
>k141_731195	1641	0	0	0	0	0	0	0	0	0	0	0	0	2	0	52	0	0	0	0	1	64	0	0	0	0	0	0	0	0	0	0	0	0	0	2
>k141_732085	435	0	0	0	0	0	0	0	0	0	0	1	0	0	0	2	0	0	0	0	0	5	0	0	0	0	0	0	0	2	0	0	2	0	0	0
>k141_738533	459	0	0	0	0	0	0	0	0	0	0	0	0	0	0	0	0	0	5	0	0	0	0	0	8	0	0	0	4	0	0	0	0	0	0	0
>k141_739799	294	0	0	0	0	0	0	0	0	0	0	0	0	1	0	0	0	0	0	0	0	1	7	0	3	0	0	0	0	0	0	0	0	0	0	0
>k141_743998	342	0	0	0	0	0	0	0	0	0	0	0	0	0	1	13	0	0	0	0	2	0	0	0	0	0	0	0	0	0	0	0	0	4	0	1
>k141_746114	279	2	0	0	0	0	0	0	0	0	0	0	0	0	0	2	0	0	0	0	0	0	0	0	0	0	0	0	0	0	0	0	0	1	0	0
>k141_748568	813	0	0	0	0	0	0	0	0	0	6	0	0	0	0	6	0	0	0	0	0	2	0	1	0	0	0	0	0	2	0	0	4	3	0	4
>k141_751068	1026	1	0	0	2	0	0	0	0	0	0	0	2	0	0	8	3	2	0	0	0	26	2	3	1	0	0	1	0	3	0	0	14	0	0	0
>k141_754714	633	0	0	0	0	0	0	0	0	0	0	0	1	1	0	2	0	0	0	0	0	15	0	0	0	0	0	0	2	6	2	0	5	1	0	3
>k141_757990	516	0	0	0	0	0	0	0	0	0	0	0	1	2	0	2	0	0	0	0	0	0	0	0	0	0	0	0	0	21	0	0	10	0	0	4
>k141_761561	750	0	0	0	0	0	0	0	0	0	0	2	0	0	0	3	4	2	3	0	0	9	2	2	0	0	0	0	0	0	0	0	0	0	0	0
>k141_763370	333	0	0	0	0	0	0	0	0	0	0	0	0	0	0	0	0	0	0	0	0	8	0	0	0	0	0	0	0	0	0	0	0	1	0	0
>k141_764817	303	0	0	0	0	0	0	0	0	0	0	0	0	0	0	2	0	0	0	0	0	10	0	0	0	0	0	0	0	0	0	0	0	0	0	0
>k141_765669	312	0	0	0	0	0	0	0	0	0	0	1	0	1	0	5	0	2	0	0	0	13	0	0	0	0	0	0	0	4	0	0	5	1	0	0
>k141_766402	405	0	0	0	0	0	0	0	0	0	0	0	0	0	0	0	0	0	0	0	0	12	0	0	0	0	0	0	0	0	0	0	0	0	0	0
>k141_772793	552	0	0	0	0	0	0	0	0	0	0	0	0	0	0	6	0	0	0	0	0	19	0	0	0	0	0	0	0	0	0	0	0	0	0	0
>k141_774476	1659	0	0	0	0	0	0	0	0	0	0	0	0	0	0	3	0	0	0	0	129	1	0	0	0	0	0	0	0	0	0	0	0	0	0	0
>k141_775860	1425	2	0	0	0	0	0	0	0	0	0	0	0	8	0	27	0	0	0	0	0	90	2	0	1	0	0	0	0	0	0	0	0	2	0	0
>k141_780377	489	0	0	0	0	0	0	0	0	0	0	0	0	0	0	2	0	0	0	0	0	0	0	0	0	0	0	0	0	6	2	0	0	6	0	0
>k141_783597	312	0	0	0	0	0	0	0	0	0	0	0	0	0	0	2	0	0	0	0	0	0	0	0	0	0	0	0	0	0	0	0	0	2	0	0
>k141_783742	540	2	0	0	0	0	0	0	0	0	0	0	0	2	0	3	0	0	0	0	0	0	2	2	2	0	0	0	0	18	0	0	7	0	0	2
>k141_784395	576	0	0	0	0	0	0	0	0	0	0	0	0	0	0	10	0	0	0	0	2	3	0	0	1	0	0	0	0	0	0	0	0	1	0	0
>k141_785958	813	11	0	0	0	0	0	0	0	0	0	0	0	0	0	12	0	0	0	0	0	5	0	0	0	0	0	0	0	0	0	0	0	0	0	0
>k141_787678	363	0	0	0	0	0	0	0	0	0	0	0	1	1	0	1	0	0	0	0	0	2	8	0	0	0	0	0	1	2	0	0	0	0	0	0
>k141_794300	1503	24	0	0	5	3	4	12	0	0	10	0	0	6	2	16	2	0	2	0	0	8	12	0	4	0	0	0	0	20	0	0	12	6	0	0
>k141_800213	447	0	0	0	0	0	0	0	0	0	2	0	0	0	0	0	0	0	0	0	0	2	0	0	0	0	0	0	0	17	1	0	0	0	0	0
>k141_800705	354	0	0	0	0	0	0	0	0	0	0	0	0	0	0	0	0	0	0	0	0	9	0	0	0	0	0	0	0	0	0	0	0	0	0	0
>k141_805230	288	0	0	0	0	0	0	0	0	0	0	0	0	0	0	1	0	0	0	0	0	5	0	0	0	0	0	0	0	0	0	0	0	0	0	0
>k141_805364	384	0	0	0	0	0	0	0	0	0	0	0	0	0	0	0	0	0	0	0	0	2	4	0	0	0	0	0	0	1	0	0	0	0	0	0
>k141_807569	435	0	0	0	0	0	0	0	0	0	0	0	0	2	0	22	0	0	2	0	0	55	0	0	0	0	0	0	0	0	0	0	0	0	0	0
>k141_813752	540	11	0	0	2	0	0	3	0	0	0	3	1	2	0	5	0	0	0	0	0	4	0	0	0	0	0	0	0	3	2	0	8	2	0	0
>k141_813837	1389	0	0	0	0	0	0	0	0	0	0	0	0	0	0	0	45	13	32	8	0	0	5	10	11	0	0	0	0	476	200	45	1664	35	0	0
>k141_817496	522	7	0	0	4	0	2	5	0	0	0	2	0	0	0	2	0	0	2	0	0	10	0	0	0	0	0	0	0	4	0	0	0	0	0	0
>k141_817660	681	6	0	0	2	0	0	0	0	0	2	0	0	2	0	9	0	0	0	0	0	2	4	0	0	0	0	0	0	2	0	0	2	2	0	0
>k141_819854	306	0	0	0	0	0	0	0	0	0	0	0	0	0	0	0	0	0	0	0	0	0	0	0	0	0	0	0	0	0	0	0	0	15	0	2
>k141_820486	1179	8	0	0	0	0	0	0	0	0	0	0	2	0	2	40	0	0	0	0	0	2	0	0	0	0	0	0	2	0	0	0	0	2	0	2
>k141_825196	481	0	0	0	0	0	0	0	2	0	0	0	0	0	0	7	0	0	2	0	0	12	2	0	1	0	0	0	0	1	0	0	2	0	0	4
>k141_825635	276	0	0	0	0	0	0	0	0	0	0	0	0	0	0	0	0	0	0	0	0	0	0	1	0	0	0	0	0	2	8	0	0	0	0	0
>k141_826149	186	2	0	0	0	0	0	0	0	0	0	0	0	0	0	0	0	0	0	0	0	0	0	0	0	0	0	0	0	0	0	0	0	2	0	0
>k141_826394	405	3	0	0	0	0	0	0	0	0	0	0	0	0	0	6	0	0	0	0	0	12	0	0	0	0	0	0	0	2	4	0	3	1	0	0
>k141_828384	171	1	0	0	0	0	0	0	0	0	0	0	0	0	0	1	0	0	0	0	0	3	0	0	0	0	0	0	0	0	0	0	0	0	0	0
>k141_830920	924	0	0	0	0	0	0	0	0	0	0	1	0	1	0	22	0	0	1	0	4	5	2	0	0	0	0	0	0	0	0	0	3	2	0	3
>k141_832280	489	4	1	0	0	0	0	0	0	0	0	2	0	0	0	5	0	0	0	0	0	10	0	0	0	0	0	0	0	0	0	0	0	4	0	0
>k141_832807	627	0	0	0	0	0	0	2	0	0	0	0	0	4	2	18	2	2	2	0	0	12	5	2	1	0	0	0	0	2	0	0	2	1	0	0
>k141_833575	387	0	0	0	0	0	0	0	0	0	0	0	0	0	0	1	0	0	0	0	0	7	0	0	0	0	0	0	0	0	0	0	3	0	0	0
>k141_845678	666	0	0	0	0	0	0	0	0	0	0	0	0	0	0	0	0	0	0	0	0	0	11	0	0	0	0	0	0	6	2	0	0	2	0	0
>k141_846616	378	1	0	0	0	0	0	0	0	0	0	0	0	1	0	14	1	0	0	0	0	14	1	0	0	0	0	0	0	0	0	0	2	0	0	0
>k141_847784	396	0	0	0	2	0	0	0	0	0	0	0	0	0	0	2	0	0	0	0	0	0	0	0	0	0	0	0	0	1	0	0	0	1	0	2
>k141_852999	762	0	0	0	0	0	0	0	0	0	0	0	0	7	0	18	0	0	0	0	0	6	0	0	0	0	0	0	0	0	0	0	0	0	0	0
>k141_855115	411	0	0	0	0	0	0	0	0	0	0	0	0	0	0	6	0	0	0	0	0	1	0	0	0	0	0	0	0	1	0	0	0	0	0	0
>k141_857726	396	0	0	0	0	0	0	2	0	0	0	0	0	0	0	4	0	0	0	0	0	2	0	0	0	0	0	0	0	0	0	0	0	0	0	0
>k141_859889	303	0	0	0	0	0	0	0	0	0	0	0	0	0	0	4	1	0	0	0	0	0	0	1	0	0	0	0	0	0	0	0	0	0	0	0
>k141_861683	426	0	0	0	0	0	0	0	0	0	0	0	0	0	0	4	0	0	0	0	0	15	0	0	0	0	0	0	0	0	0	0	0	0	0	0
>k141_875394	414	1	0	0	0	0	0	2	0	0	0	2	0	0	0	0	0	0	0	1	0	1	2	0	0	0	0	0	0	0	1	0	0	0	0	0
>k141_877318	618	1	0	0	0	0	0	0	0	0	2	6	1	1	1	11	0	1	0	0	0	11	1	2	0	0	0	0	8	0	0	0	2	5	0	0
>k141_877845	1066	10	0	0	2	0	0	1	0	0	0	2	0	0	0	1	0	0	0	0	0	0	4	3	0	0	0	0	0	9	0	0	2	3	0	0
>k141_879119	813	0	0	0	0	0	0	0	0	0	2	0	0	0	2	0	6	0	0	0	0	0	12	4	4	0	0	0	0	5	0	0	0	0	0	0
>k141_880960	474	4	0	0	5	0	0	5	0	0	0	0	0	2	0	4	1	0	0	0	0	1	1	0	0	0	0	0	0	7	0	0	4	0	0	0
>k141_898411	680	9	0	0	0	2	1	2	0	0	0	1	0	0	0	12	0	1	0	0	0	7	1	0	3	0	0	0	2	3	1	0	4	0	0	0
>k141_900444	387	0	0	0	0	0	0	0	0	0	5	0	0	0	0	2	0	0	0	2	0	2	0	0	0	0	0	0	0	0	0	0	0	0	0	1
>k141_900609	675	3	0	0	1	0	0	0	0	0	1	1	1	1	3	24	0	1	1	0	0	22	13	0	1	0	0	0	4	0	0	2	3	6	0	0
>k141_900872	1329	0	0	0	0	0	0	0	6	0	4	12	4	2	0	8	0	0	0	0	0	5	0	0	0	0	0	0	2	4	0	0	0	0	0	0
>k141_901842	504	0	0	0	0	0	0	0	0	0	0	0	0	0	0	0	0	0	0	0	0	0	0	0	0	0	0	0	0	5	0	0	0	16	0	9
>k141_903192	375	0	1	0	0	0	0	1	0	0	0	0	0	0	0	7	0	0	0	0	2	3	0	0	7	0	0	0	0	0	0	0	0	0	0	0
>k141_903995	489	0	0	0	0	0	0	0	0	0	0	1	0	2	0	5	0	0	0	0	0	5	0	0	0	0	0	0	4	0	0	0	0	0	0	0
>k141_904227	516	0	0	0	0	0	0	0	0	0	1	0	0	0	0	7	0	0	1	0	0	4	0	0	2	0	0	0	2	1	2	0	5	0	2	1
>k141_905935	690	0	4	0	0	0	0	0	0	0	0	0	0	0	0	0	0	0	0	0	0	31	0	0	0	0	0	0	0	0	0	0	0	0	0	0
>k141_906742	492	0	0	0	0	0	0	0	0	0	3	2	0	0	0	2	0	0	0	0	0	3	0	0	0	0	2	0	0	4	0	0	1	0	0	0
>k141_912538	420	0	0	0	0	0	0	0	0	0	0	0	0	0	0	1	0	0	0	0	0	0	0	0	0	0	0	0	0	0	0	0	0	14	0	0
>k141_912766	372	0	0	0	0	0	0	0	0	0	0	0	0	2	0	1	0	0	0	0	0	15	3	0	0	0	0	0	0	0	0	0	0	0	0	0
>k141_916387	600	0	0	0	0	0	0	0	0	0	0	0	0	0	0	1	0	0	0	0	0	5	0	3	10	0	0	0	0	2	0	0	0	0	0	0
>k141_917379	351	0	0	0	0	0	0	0	0	0	0	1	0	0	2	0	0	0	0	0	0	0	4	1	0	0	0	0	0	0	0	0	0	0	0	0
>k141_923649	1179	1	40	18	0	0	0	0	0	0	0	0	0	0	0	0	0	0	0	0	0	0	0	0	0	0	0	0	0	0	0	0	0	0	0	0
>k141_924600	363	0	0	0	0	0	0	0	0	0	0	0	0	0	2	13	0	0	0	0	0	2	0	0	0	0	0	0	0	0	0	0	0	2	0	0
>k141_929070	375	0	0	0	0	0	0	0	0	0	0	0	0	2	1	5	0	0	0	0	2	3	3	0	0	0	0	0	2	0	0	0	3	2	0	0
>k141_930483	510	2	0	0	0	0	0	0	0	0	0	2	0	4	0	6	0	0	0	0	4	17	3	0	3	0	0	0	0	0	0	0	3	1	0	1
>k141_934500	573	1	0	0	0	0	0	0	0	0	0	0	2	0	0	0	0	0	0	0	0	0	0	0	0	0	0	0	0	4	0	0	0	10	0	0
>k141_936682	252	0	0	0	0	0	0	0	0	0	0	0	0	0	0	0	0	0	0	0	0	0	1	0	0	0	0	0	4	0	0	0	0	0	0	0
>k141_938257	285	0	0	0	0	0	0	0	0	0	0	0	0	2	0	0	0	0	0	0	0	1	0	0	0	0	0	0	0	0	0	0	9	0	0	0
>k141_940846	390	0	0	0	0	0	0	0	0	0	0	0	0	0	0	0	0	0	0	0	0	0	0	0	0	0	0	0	0	8	0	0	2	0	0	0
>k141_942758	597	0	1	0	0	0	0	0	0	0	0	0	0	0	0	0	0	0	0	0	0	1	0	1	0	0	0	0	0	17	0	0	7	0	0	0
>k141_955624	390	2	0	0	0	0	2	0	0	0	0	0	0	0	0	0	0	1	0	0	0	0	4	0	7	0	0	4	0	1	2	0	1	0	0	0
>k141_955752	513	0	0	0	0	0	0	0	0	0	0	0	0	0	0	0	0	0	0	0	0	0	0	0	0	0	0	0	0	0	0	0	0	0	6	0
>k141_957476	379	4	0	0	0	0	0	0	0	0	0	0	0	0	0	2	0	0	0	0	0	3	0	0	4	0	0	0	0	0	2	0	1	0	0	0
>k141_960726	459	0	0	0	0	0	0	0	0	0	0	0	0	6	0	3	0	0	0	0	0	0	0	0	0	0	0	0	0	0	0	0	0	0	0	0
>k141_961012	285	1	0	0	0	0	0	0	0	0	0	0	0	0	0	0	0	0	0	0	0	0	0	0	0	0	0	0	0	0	0	0	0	2	0	2
>k141_962235	450	0	0	0	0	0	0	0	0	0	0	0	0	0	0	0	0	0	0	0	0	0	0	0	0	0	0	0	0	0	4	0	15	0	0	0
>k141_964825	234	0	0	0	0	0	0	0	0	0	0	0	0	0	0	5	0	0	0	0	0	2	0	0	0	0	0	0	0	0	0	0	0	1	0	0
>k141_965163	300	9	0	0	0	0	0	0	0	0	0	0	0	0	0	0	0	0	0	0	0	0	0	0	1	0	0	0	0	0	0	0	0	0	0	0
>k141_970504	648	8	0	0	0	0	0	1	0	0	4	0	0	2	2	5	0	0	0	0	0	6	2	0	0	0	0	0	2	36	0	0	8	2	0	2
>k141_977992	1244	0	0	0	0	0	0	0	0	0	0	0	0	0	0	16	0	0	0	0	0	21	0	0	0	0	0	0	2	2	10	0	8	0	0	0
>k141_980462	465	1	0	0	0	0	0	2	0	0	0	0	0	1	0	1	0	0	0	0	0	5	0	0	0	0	0	0	0	1	2	0	0	0	0	0
>k141_986145	303	0	0	0	0	0	0	0	0	0	2	0	0	0	0	0	0	0	0	0	0	0	1	0	0	0	0	0	0	2	0	0	0	0	0	0
>k141_991618	723	0	0	0	0	0	0	0	0	0	0	0	0	0	0	1	0	0	0	0	2	23	4	4	0	0	0	0	2	1	2	0	2	0	1	0
>k141_994009	996	0	0	0	0	0	0	0	0	0	0	0	0	0	0	47	0	0	0	0	2	65	1	0	0	0	0	0	0	2	0	0	0	4	0	4
>k141_994621	525	0	0	0	0	0	0	0	0	0	0	0	0	2	0	2	0	0	0	0	2	11	0	0	2	0	0	0	1	0	0	0	0	0	0	0
>k141_994728	762	0	0	0	0	0	0	0	0	0	0	0	0	2	0	6	6	6	0	0	0	8	2	1	0	0	0	0	0	3	0	0	0	0	0	0
>k141_997490	1293	0	0	0	0	0	0	0	0	0	0	0	0	0	0	2	0	0	0	0	0	0	0	0	0	0	4	0	0	15	0	0	2	81	0	24
>k141_1004180	384	0	0	0	0	0	0	0	0	0	0	0	2	0	0	7	2	0	0	0	0	4	0	0	3	0	0	2	0	1	0	2	0	0	0	0
>k141_1004466	741	0	0	0	0	0	0	0	0	0	0	0	0	0	0	0	0	0	1	0	0	0	2	4	10	0	0	0	8	0	0	0	0	0	0	0
>k141_1007973	261	0	0	0	0	0	0	0	0	0	0	0	0	0	0	0	0	0	0	0	0	2	0	0	0	0	0	0	0	0	0	0	2	2	0	0
>k141_1008052	366	1	0	0	0	0	0	0	0	0	0	0	0	0	0	0	0	0	0	0	0	0	8	0	0	0	0	0	0	0	0	0	2	0	0	0
>k141_1008759	357	0	0	0	0	0	0	0	0	0	0	0	0	0	0	0	2	0	0	0	0	0	0	0	0	0	0	0	0	4	4	0	2	0	0	0
>k141_1008971	291	0	0	0	0	0	0	0	0	0	0	0	0	1	2	2	0	0	0	0	0	2	1	0	0	0	0	0	0	0	0	0	0	0	0	1
>k141_1011709	273	0	2	0	0	0	0	0	0	0	0	0	0	0	0	0	0	0	0	0	0	0	1	0	0	0	0	0	0	9	0	0	6	0	0	0
>k141_1013678	288	1	0	0	0	0	0	0	0	0	0	0	0	1	0	0	0	4	2	0	1	7	0	0	0	0	0	0	2	0	0	0	2	0	0	0
>k141_1018082	342	0	0	0	0	0	0	0	0	0	0	0	0	0	0	0	0	0	0	0	0	0	0	0	0	0	0	0	0	0	0	0	0	8	0	2
>k141_1018336	360	0	0	0	0	0	0	0	0	0	0	0	0	2	0	8	0	0	0	0	0	2	0	0	0	0	0	0	0	0	0	0	0	0	0	2
>k141_1026681	1008	6	0	0	1	0	0	1	2	0	0	0	0	0	0	3	2	0	2	0	0	2	13	0	6	0	0	0	0	12	5	0	2	0	0	2
>k141_1027867	699	0	0	0	0	0	0	0	0	0	0	0	0	1	0	26	0	0	0	0	0	9	2	0	0	0	0	0	0	0	0	0	0	0	0	2
>k141_1028296	942	0	0	0	0	0	0	0	0	0	0	0	0	9	6	28	0	0	0	0	0	20	0	0	0	0	0	0	0	0	0	0	0	0	0	1
>k141_1029089	726	11	0	0	0	0	2	0	0	0	0	0	0	0	0	2	0	0	0	0	0	0	0	0	0	0	0	0	0	0	0	0	0	10	0	0
>k141_1029757	288	4	0	0	0	0	0	0	0	0	0	0	0	0	0	0	0	0	0	0	0	3	0	0	0	0	0	0	0	0	0	0	0	0	0	0
>k141_1034369	540	0	0	0	0	0	0	0	0	0	0	0	0	0	0	2	0	0	0	0	0	4	0	0	0	0	0	0	0	6	0	0	3	0	0	0
>k141_1036385	381	0	0	0	0	0	0	0	0	0	0	0	0	2	3	3	0	0	1	1	0	26	0	0	4	0	2	0	4	0	1	0	1	0	0	0
>k141_1037422	327	0	0	0	0	0	0	0	0	0	0	1	0	0	0	0	0	0	0	0	0	0	2	0	0	0	0	0	0	0	0	0	2	0	0	0
>k141_1042737	513	0	0	0	0	0	0	1	0	0	0	0	0	2	0	7	1	0	0	0	0	4	0	0	0	0	0	0	0	0	0	0	0	0	0	0
>k141_1044310	309	0	0	0	0	0	0	0	0	0	0	0	0	0	0	0	0	0	0	0	0	0	2	0	0	0	0	0	0	8	0	0	1	0	0	0
>k141_1047379	503	0	0	0	0	0	0	0	0	0	0	0	0	0	0	4	0	0	0	0	0	0	0	2	0	0	0	0	2	0	0	0	0	19	0	0
>k141_1048805	420	0	0	0	0	0	0	0	0	0	0	0	0	0	0	0	0	0	0	0	0	0	0	0	0	0	0	0	0	2	0	0	0	15	0	7
>k141_1050356	807	1	0	0	0	2	0	1	2	0	0	0	2	0	0	20	2	0	0	0	0	6	0	0	0	0	0	2	0	1	0	0	6	0	0	0
>k141_1057151	681	3	0	0	0	0	0	2	0	0	0	0	0	0	0	5	0	0	0	0	0	24	0	0	0	0	0	0	0	0	0	0	0	0	0	3
>k141_1058001	312	6	2	0	0	0	0	2	0	0	0	0	0	0	0	0	0	0	0	0	0	0	0	0	0	0	0	0	0	0	0	0	0	0	0	0
>k141_1059191	660	8	0	0	0	0	0	0	0	0	0	0	0	0	0	2	0	0	0	0	0	0	0	0	0	0	0	0	0	0	0	0	0	8	0	0
>k141_1062373	426	0	0	0	0	0	0	0	0	0	0	0	0	0	0	8	0	0	0	0	0	3	0	0	0	0	0	0	0	2	2	0	2	0	0	0
>k141_1063615	339	1	0	0	0	0	0	0	0	0	0	0	0	0	0	1	0	0	0	0	0	1	0	0	0	0	0	0	4	1	0	0	2	0	0	0
>k141_1064422	537	3	0	0	0	2	0	1	0	0	0	1	0	0	0	15	0	0	0	0	0	21	0	0	0	0	0	0	0	2	0	0	1	0	0	0
>k141_1068524	273	0	0	0	0	0	0	0	0	0	0	0	0	0	0	2	0	0	0	0	0	0	0	0	2	0	0	0	0	0	0	0	0	0	0	0
>k141_1069180	426	0	0	0	0	0	0	0	0	0	0	0	0	0	0	0	0	0	0	0	0	0	0	0	0	0	0	0	0	18	0	0	0	0	0	0
>k141_1075921	642	0	0	0	0	0	0	0	0	0	0	0	0	0	0	21	2	0	0	0	0	10	0	0	0	0	0	0	0	0	0	0	0	0	0	1
>k141_1078461	300	0	0	0	0	0	0	0	0	0	0	0	0	0	0	4	0	0	0	0	0	0	0	0	0	0	0	0	0	0	0	0	0	0	0	0
>k141_1078876	732	9	2	4	0	0	0	0	0	0	0	0	0	0	0	0	0	0	0	0	0	0	0	0	0	0	0	0	0	0	0	0	0	0	0	0
>k141_1080802	447	0	0	0	0	0	0	0	0	0	0	0	0	0	0	0	0	0	0	0	0	2	0	0	0	0	0	0	0	6	2	0	2	0	0	0
>k141_1080813	405	0	0	0	0	0	0	0	0	0	0	0	0	0	0	10	0	0	0	0	0	0	0	0	0	0	0	0	0	0	0	0	0	0	0	0
>k141_1086727	309	0	0	0	0	0	0	0	0	0	0	0	0	0	0	0	0	0	0	0	0	0	0	0	0	0	0	0	0	13	0	0	0	0	0	0
>k141_1090379	390	0	0	0	0	0	0	0	0	0	1	0	0	0	0	3	0	0	0	0	0	22	0	0	1	0	0	0	0	0	0	0	1	0	0	0
>k141_1091000	795	4	0	0	0	0	0	0	0	0	2	0	0	0	0	11	1	0	1	0	10	17	5	0	2	0	0	0	3	4	3	0	11	0	0	0
>k141_1097147	294	0	0	0	0	0	0	0	0	0	0	0	2	2	0	0	0	0	0	0	0	1	0	0	0	0	0	0	0	0	0	0	0	0	0	0
>k141_1098126	330	0	0	0	0	0	0	0	0	0	0	0	0	0	0	5	0	0	0	0	1	2	2	0	0	0	0	0	0	0	0	0	0	1	0	0
>k141_1098755	390	0	0	0	0	0	0	0	0	0	0	0	0	0	0	6	0	0	0	0	0	0	0	0	0	0	0	0	0	0	0	0	3	0	0	0
>k141_1100848	288	0	0	0	0	0	0	0	0	0	0	0	0	0	0	0	0	0	0	0	0	0	0	4	0	0	0	0	0	2	0	0	2	0	0	0
>k141_1101186	399	5	0	0	0	0	0	0	0	0	0	0	0	0	0	0	0	0	0	0	0	0	0	0	0	0	0	0	0	0	0	0	0	4	0	2
>k141_1102524	585	2	0	0	0	0	0	0	0	0	0	0	0	4	0	4	2	0	2	0	0	14	0	0	0	0	0	2	0	0	8	0	4	0	0	0
>k141_1105992	612	0	0	0	0	0	0	0	0	0	0	0	0	0	0	4	0	2	0	0	0	4	7	6	6	0	0	2	0	2	4	0	2	0	0	0
>k141_1106156	418	4	0	0	0	0	0	2	2	0	0	0	0	0	0	13	2	0	0	0	0	7	1	0	0	0	0	0	0	0	0	0	0	0	0	0
>k141_1107613	345	5	0	0	0	0	0	0	0	0	2	7	0	0	0	3	0	0	2	0	1	15	0	0	0	0	0	0	0	0	0	0	0	0	0	0
>k141_1110440	363	2	0	0	0	0	0	0	0	0	0	0	0	0	2	16	0	0	0	0	0	0	0	0	0	0	0	0	0	0	0	0	0	0	0	0
>k141_1111312	324	0	0	0	0	0	0	0	0	0	0	0	0	0	0	4	0	0	0	0	0	12	0	0	0	0	0	0	0	0	0	0	0	0	0	0
>k141_1115260	237	0	0	0	0	0	0	0	0	0	0	0	0	0	0	0	0	0	0	0	0	0	0	0	0	0	0	0	0	0	0	0	7	0	0	0
>k141_1117511	309	0	0	0	0	0	0	0	0	0	0	0	0	2	0	1	0	0	0	0	0	0	0	0	0	0	0	0	0	0	1	0	3	0	0	2
>k141_1117642	309	0	0	0	0	0	0	1	0	0	0	0	0	0	0	6	0	0	1	0	0	4	0	0	1	0	0	0	1	0	2	0	0	2	0	0
>k141_1122385	291	0	0	0	0	0	0	0	0	0	0	0	0	0	0	1	0	0	0	0	0	1	0	0	0	0	0	0	0	0	0	0	0	0	0	0
>k141_1123598	381	1	0	0	0	0	0	0	0	0	0	0	0	0	0	17	0	0	0	0	2	10	0	0	1	0	0	0	0	0	0	0	0	0	0	0
>k141_1132420	285	0	0	0	0	0	0	0	0	0	0	0	0	0	0	3	0	0	0	0	0	2	0	0	0	0	0	0	0	2	0	0	0	3	0	0
>k141_1132827	1059	40	0	0	2	0	0	46	0	0	0	0	2	0	0	25	0	0	0	0	0	0	0	0	0	0	0	0	0	4	0	0	0	0	0	0
>k141_1133071	357	0	0	0	0	0	0	3	0	0	0	4	0	0	0	0	0	0	0	0	0	0	0	0	0	0	0	0	0	5	0	0	9	0	0	0
>k141_1136547	765	0	0	0	0	0	0	0	0	0	0	0	0	4	0	30	0	0	0	0	0	40	2	0	0	0	2	0	0	0	0	0	0	0	0	0
>k141_1136768	468	0	0	0	0	0	0	0	0	0	0	0	0	0	0	0	2	2	0	0	0	13	0	0	0	0	0	0	0	0	0	0	0	0	0	0
>k141_1138691	324	1	0	0	0	0	0	0	0	0	0	0	0	2	0	2	0	0	0	0	2	0	0	0	0	0	0	0	0	4	0	0	0	0	0	0
>k141_1140209	300	0	0	0	0	0	0	0	0	0	0	0	0	4	0	3	0	0	0	0	0	3	0	0	0	0	0	0	0	0	0	0	0	0	0	0
>k141_1140958	309	0	0	0	0	0	0	0	0	0	0	2	0	1	0	7	0	0	0	0	0	3	0	0	0	0	0	0	0	0	0	0	2	0	0	0
>k141_1142313	1572	0	4	0	0	0	0	3	0	0	2	3	0	0	0	6	0	2	0	0	0	99	6	0	0	0	0	0	2	0	7	0	4	0	0	0
>k141_1143338	353	0	0	0	0	0	0	0	0	0	0	0	0	0	0	0	0	0	0	0	0	0	0	0	0	0	0	0	0	2	0	0	0	4	0	0
>k141_1143958	375	2	0	0	0	0	0	0	0	0	0	0	0	0	0	4	0	0	0	0	0	12	0	0	0	0	0	0	0	0	0	0	0	0	0	0
>k141_1145639	1116	23	0	0	1	0	0	10	0	0	0	2	0	2	0	0	4	4	6	0	0	4	10	0	10	0	0	0	0	3	0	0	0	0	0	0
>k141_1147125	297	0	0	0	0	0	0	0	0	0	2	0	0	0	0	4	0	0	0	0	3	4	0	1	0	0	0	0	0	1	0	0	0	0	0	0
>k141_1150773	1569	4	0	0	0	0	0	0	0	0	2	0	0	0	0	12	0	0	0	0	0	1	18	30	22	0	0	0	0	57	2	0	8	0	0	0
>k141_1150854	405	1	0	0	0	0	0	0	0	0	0	0	0	4	0	4	0	0	0	0	2	5	0	1	0	0	0	0	0	0	0	0	3	2	0	4
>k141_1150938	384	3	0	0	0	0	0	0	0	0	0	0	0	0	0	7	0	0	0	0	0	14	0	0	0	0	0	0	0	0	2	0	0	0	0	0
>k141_1151759	309	0	0	0	0	0	0	0	0	0	0	0	0	0	0	2	0	0	0	0	0	0	0	0	0	0	0	0	5	0	0	0	1	0	0	2
>k141_1151928	372	0	0	0	0	0	0	0	0	0	0	0	0	0	0	4	0	0	0	0	0	0	0	0	0	0	0	0	0	2	0	0	0	4	0	0
>k141_1152462	768	5	2	0	0	0	0	0	2	0	0	0	0	5	0	8	0	0	1	0	0	15	1	0	0	0	0	0	0	0	0	0	0	0	0	0
>k141_1153672	1800	0	0	0	0	0	0	0	0	0	0	0	0	0	0	0	0	14	0	6	4	0	0	0	0	0	85	0	67	0	8	4	0	21	10	0
>k141_1154264	333	0	0	0	0	0	0	0	0	0	0	0	0	0	0	6	0	0	0	0	0	4	0	0	2	0	0	0	0	0	0	0	0	0	0	0
>k141_1155740	396	0	0	0	0	0	0	0	0	0	0	0	0	4	0	9	0	0	0	0	2	10	2	0	0	0	0	0	0	0	0	0	0	0	0	0
>k141_1157701	390	0	0	0	0	0	0	0	0	0	0	0	0	0	0	0	0	0	0	0	0	0	0	0	2	0	0	0	0	4	0	0	1	0	0	0
>k141_1157979	435	0	0	0	0	0	0	0	0	0	0	0	0	0	0	2	0	0	0	0	0	2	6	2	2	0	0	0	0	0	0	0	0	0	0	0
>k141_1158329	285	0	0	0	0	0	0	0	0	0	0	0	0	0	0	1	0	0	0	0	0	5	0	0	0	0	0	0	0	0	0	0	0	0	0	0
>k141_1159126	417	0	0	0	0	0	0	0	0	0	0	0	0	2	2	18	0	0	0	0	4	11	0	0	0	0	0	0	0	0	0	0	0	0	0	0
>k141_1160011	744	0	0	0	0	0	0	0	0	0	0	0	0	2	0	11	0	0	0	0	0	36	0	0	0	0	0	0	0	0	0	0	0	0	0	0
>k141_1165842	441	0	0	0	0	0	0	0	0	0	0	0	0	0	0	2	0	0	0	0	0	2	0	0	0	0	0	0	0	0	0	0	0	6	0	2
>k141_1166423	288	0	0	0	0	0	0	0	0	0	0	0	0	0	0	0	0	0	0	0	0	0	0	0	0	0	0	0	0	5	2	0	4	0	0	0
>k141_1170197	402	0	0	0	0	0	0	0	0	0	0	0	0	0	0	3	0	0	2	0	0	25	0	0	0	0	0	0	0	0	0	0	0	0	0	0
>k141_1173345	402	0	0	0	0	0	0	0	0	0	0	0	0	0	0	0	0	0	0	0	0	6	1	1	0	0	0	0	0	3	0	0	2	0	0	0
>k141_1174862	288	0	4	0	0	0	0	0	0	0	0	0	0	4	0	4	0	0	0	0	0	6	0	0	0	0	0	0	0	0	0	0	4	0	0	0
>k141_1175461	312	0	2	0	0	0	0	0	0	0	0	1	0	0	0	0	0	0	0	0	5	0	0	0	0	0	0	0	0	0	0	0	0	0	0	0
>k141_1175781	387	0	0	0	0	0	0	0	0	0	0	0	0	0	0	9	0	0	0	0	0	10	0	0	0	0	0	0	0	0	0	0	0	2	0	0
>k141_1178923	411	0	0	0	0	0	0	1	0	0	0	0	0	2	0	10	0	0	0	0	0	8	0	0	0	0	0	0	2	0	0	0	0	0	0	1
>k141_1182931	417	2	0	0	3	0	0	0	0	0	0	0	0	1	0	3	0	2	0	0	2	7	0	2	0	0	0	0	1	0	0	0	0	0	0	1
>k141_1183978	372	0	0	0	0	0	0	0	0	0	0	0	2	1	0	9	0	0	2	0	0	10	0	2	1	0	0	0	0	0	0	0	0	0	0	0
>k141_1187786	588	0	0	0	0	0	0	0	0	0	0	0	0	0	0	0	0	0	0	0	0	19	0	0	0	0	0	2	0	0	0	0	0	0	0	0
>k141_1188781	315	2	0	0	0	0	0	0	0	0	0	0	0	3	0	3	0	0	0	0	1	3	1	0	0	0	0	0	0	0	0	0	0	0	0	0
>k141_1193183	396	0	0	0	0	0	0	0	0	0	0	0	0	0	0	6	0	0	0	0	0	2	0	0	0	0	0	0	0	0	0	0	0	0	0	0
>k141_1193477	537	0	0	0	0	0	0	0	0	0	1	2	0	3	0	11	0	0	0	0	2	18	0	0	0	0	0	0	0	1	0	0	0	0	0	0
>k141_1193574	921	0	2	0	0	0	0	0	0	0	2	0	0	5	0	45	0	0	0	0	0	58	2	0	0	0	0	0	0	1	0	0	0	0	0	0
>k141_1193710	312	0	0	0	0	0	0	0	0	0	0	0	0	0	0	1	0	0	0	0	0	10	0	0	0	0	0	0	0	0	0	0	0	0	0	0
>k141_1194269	312	0	0	0	0	0	0	0	0	0	0	0	0	0	0	0	0	0	0	0	0	1	0	0	0	0	0	0	0	0	0	0	2	3	0	0
>k141_1197906	558	3	0	0	0	0	0	0	0	0	0	1	2	0	0	8	0	0	1	0	0	13	2	0	2	0	0	0	3	0	2	0	0	0	0	1
>k141_1198883	315	0	0	0	0	0	0	0	0	0	0	0	0	0	0	6	0	0	0	0	0	3	2	0	0	0	0	0	0	0	0	0	2	2	0	0
>k141_1200810	402	0	0	0	0	0	0	0	0	0	0	0	0	0	0	2	0	0	0	0	0	0	0	0	0	0	0	0	0	1	0	0	0	5	0	0
>k141_1204626	309	2	0	0	0	0	0	0	0	0	2	1	0	0	1	2	0	0	0	0	3	0	0	0	2	0	0	0	0	0	0	0	0	2	0	0
>k141_1208725	276	0	0	0	0	0	0	0	0	0	0	0	0	0	0	1	0	0	0	0	0	1	0	0	0	0	0	0	0	0	1	0	7	0	0	0
>k141_1211049	564	0	0	0	0	0	0	0	0	0	0	0	0	0	0	3	0	0	0	0	0	8	2	2	0	0	2	0	3	2	0	0	0	2	0	0
>k141_1212459	423	1	0	0	0	2	0	0	0	0	0	0	0	0	0	7	0	0	0	0	0	4	0	0	0	0	0	0	0	2	0	0	0	2	0	2
>k141_1217151	801	0	0	0	0	0	0	0	0	0	0	0	0	0	0	20	0	0	0	0	0	4	2	0	0	0	0	0	0	11	0	0	15	2	0	2
>k141_1217808	153	0	0	0	0	0	0	0	0	0	0	0	0	0	0	0	0	0	0	0	0	0	2	0	0	0	0	0	0	0	0	0	0	2	0	0
>k141_1218043	369	0	0	0	0	0	0	0	0	0	0	0	0	0	0	0	0	0	0	0	0	10	0	0	0	0	0	0	0	0	0	0	0	0	0	0
>k141_1225448	483	0	0	0	0	0	0	0	0	0	0	0	0	2	0	0	0	0	0	0	0	2	0	0	0	0	0	0	0	1	0	0	0	9	0	0
>k141_1227781	342	3	0	0	2	0	0	0	0	0	0	0	0	0	0	0	0	0	0	0	0	0	2	0	0	0	0	0	0	2	0	0	0	2	0	2
>k141_1230113	465	2	0	0	0	0	0	0	2	0	5	2	0	0	0	0	2	0	0	0	0	1	0	0	0	0	0	0	3	3	0	0	1	0	0	0
>k141_1230416	390	0	0	0	0	0	0	0	0	0	0	0	0	0	0	0	3	0	0	0	0	3	0	0	0	0	0	0	0	3	0	0	0	0	0	0
>k141_1231774	174	0	0	0	0	0	0	0	0	0	0	0	0	0	0	0	0	0	0	0	0	0	0	0	0	0	0	0	0	0	0	0	0	0	0	0
>k141_1234077	429	0	0	0	0	0	0	0	0	0	0	0	0	0	0	2	0	0	0	0	0	0	3	0	0	0	0	0	0	0	0	0	0	10	0	0
>k141_1237771	267	0	2	0	0	0	0	0	0	0	0	0	0	0	1	6	0	0	0	0	1	4	0	0	3	0	0	0	0	0	0	0	1	0	0	0
>k141_1238204	732	1	0	0	0	0	0	0	0	0	0	5	0	0	2	12	0	0	0	0	4	10	2	2	4	0	2	0	4	5	0	0	4	0	0	0
>k141_1252644	309	0	0	0	0	0	0	0	0	0	0	0	0	0	0	0	0	0	0	0	0	3	0	0	0	0	0	0	1	1	0	0	0	0	0	0
>k141_1253120	453	0	0	0	0	0	0	0	0	0	0	0	0	0	0	6	3	2	4	0	0	7	2	0	0	0	2	0	0	2	0	0	0	9	0	2
>k141_1261436	885	8	0	0	2	0	2	9	0	0	0	0	0	9	0	16	4	2	2	0	0	18	0	0	7	0	0	0	2	2	3	0	0	1	0	2
>k141_1261982	315	0	0	0	0	0	0	0	0	0	0	0	0	0	0	0	0	0	0	0	0	6	0	0	0	0	0	0	0	0	4	0	4	0	0	1
>k141_1266866	708	2	0	0	0	0	0	2	0	0	0	0	0	0	0	6	0	0	0	0	0	2	25	3	8	0	0	0	0	3	2	0	0	2	0	0
>k141_1267150	483	0	0	0	0	0	0	0	0	0	0	0	0	0	0	0	0	2	0	0	3	0	0	0	2	0	0	0	3	4	0	0	3	0	0	0
>k141_1272114	345	0	0	0	0	0	0	0	0	0	0	0	0	0	0	4	0	0	0	0	0	0	0	0	0	0	0	0	0	0	0	0	0	4	0	0
>k141_1274521	492	3	0	0	0	0	0	2	0	0	0	0	0	0	0	0	0	1	0	0	0	0	2	0	0	0	0	0	0	2	0	0	0	0	0	0
>k141_1274855	330	0	0	0	0	0	0	0	0	0	0	0	0	0	0	0	0	0	0	0	0	0	0	0	0	0	0	0	0	0	0	0	11	0	0	0
>k141_1276352	291	5	0	0	3	0	0	0	0	0	0	0	0	0	0	0	0	0	0	0	0	0	0	0	0	0	0	0	0	0	0	0	0	0	0	0
>k141_1277206	702	0	0	0	0	0	0	0	0	0	0	0	0	0	0	0	0	0	0	0	0	0	29	0	0	0	0	0	0	0	0	0	0	0	0	0
>k141_1282003	390	0	0	0	0	0	0	0	0	0	0	0	2	0	0	0	0	0	0	0	0	8	0	0	0	0	0	0	0	0	0	0	0	0	0	0
>k141_1286773	357	5	0	0	0	0	0	1	0	0	0	0	0	0	0	0	0	0	0	0	0	0	0	0	0	0	0	0	0	2	0	0	0	0	0	0
>k141_1288791	675	0	0	0	0	0	0	0	0	0	0	0	0	0	0	0	0	0	0	0	0	0	0	0	0	5	0	0	0	0	0	1	0	0	6	0
>k141_1293386	336	0	0	0	0	0	0	0	0	0	0	0	0	0	0	6	0	0	0	0	0	3	0	0	0	0	0	0	0	0	0	0	0	0	0	0
>k141_1302323	300	0	0	0	0	0	0	0	0	0	0	0	0	0	0	0	0	0	0	0	0	0	0	0	0	0	0	0	0	3	0	0	0	11	0	0
>k141_1304342	585	0	0	0	0	0	0	0	0	0	0	0	0	0	0	2	0	0	0	0	0	0	3	0	0	0	0	0	0	6	0	0	2	2	0	0
>k141_1304435	354	0	0	0	0	0	0	0	0	0	0	0	0	0	0	5	0	0	0	0	0	14	0	0	0	0	0	0	0	0	0	0	0	0	0	2
>k141_1306576	435	0	0	0	0	0	0	0	0	0	0	0	0	0	0	5	0	2	0	0	0	6	0	0	0	0	0	0	0	2	0	0	1	1	0	0
>k141_1306682	954	0	0	0	0	0	1	0	0	0	0	0	0	1	1	6	0	0	2	0	0	43	0	2	2	0	0	0	6	4	2	0	0	1	0	0
>k141_1307785	303	0	0	0	0	0	0	0	0	0	0	0	0	0	0	0	0	0	0	0	0	0	0	0	0	0	0	0	0	0	0	0	0	5	0	0
>k141_1317366	561	17	0	2	4	0	0	2	0	0	0	0	0	0	0	0	0	0	0	0	0	0	0	0	0	0	0	0	0	0	0	0	0	0	0	0
>k141_1317763	300	0	0	0	0	0	0	0	0	0	0	0	0	0	0	7	0	0	0	0	0	2	0	0	0	0	0	0	0	0	0	0	2	0	0	0
>k141_1318063	1047	0	0	0	0	0	0	0	2	0	0	2	2	3	0	4	4	2	0	0	0	6	21	4	20	0	0	4	2	0	2	0	0	0	0	0
>k141_1319969	582	3	0	0	0	0	0	0	0	0	0	0	0	0	0	5	0	0	0	0	1	6	0	0	0	0	0	0	0	0	0	0	0	1	0	0
>k141_1324283	393	0	0	0	0	0	0	0	0	0	0	0	0	0	0	4	0	0	1	0	0	2	0	0	0	0	0	0	0	0	0	0	0	0	0	0
>k141_1326957	1269	4	0	0	0	0	0	0	0	0	2	2	0	0	0	0	0	0	0	0	0	0	2	2	3	0	0	0	0	38	0	0	18	0	0	0
>k141_1328502	672	2	0	0	0	0	0	0	0	0	0	0	0	0	0	0	0	0	0	0	0	10	0	0	0	0	0	0	0	5	0	0	2	2	0	0
>k141_1329353	333	0	0	0	0	0	0	0	0	0	0	0	0	0	0	5	0	0	0	0	0	8	0	0	0	0	0	0	0	0	0	0	0	0	0	0
>k141_1329441	543	2	0	0	0	0	0	0	4	0	2	2	0	0	0	7	4	0	0	0	0	8	0	0	0	0	0	0	0	0	0	0	1	0	0	0
>k141_1329676	450	0	0	0	0	0	0	0	0	0	0	0	0	0	0	0	0	0	0	0	0	0	0	0	0	0	0	0	0	8	2	0	0	0	0	0
>k141_1331615	336	0	0	0	0	0	0	0	0	0	2	0	0	0	0	2	0	0	0	0	0	3	0	0	0	0	0	0	0	0	0	0	0	0	0	0
>k141_1331985	303	0	0	0	0	0	0	0	0	0	0	0	0	0	0	2	0	0	0	0	0	6	0	0	0	0	0	0	0	0	0	0	0	0	0	0
>k141_1332459	414	0	0	0	0	0	0	0	0	0	0	0	0	0	0	2	0	0	0	0	0	4	0	0	0	0	0	0	0	1	0	0	3	0	0	0
>k141_1332904	1398	1	0	0	0	0	0	0	0	1	1	5	0	0	0	8	0	0	0	0	0	2	0	0	0	0	0	0	1	83	6	0	198	4	0	0
>k141_1335740	300	0	0	0	0	0	0	0	0	0	0	0	0	0	0	0	4	0	0	0	0	0	2	0	0	0	0	0	0	0	0	0	0	0	0	0
>k141_1335818	300	0	0	0	0	0	0	0	0	0	0	0	0	2	0	10	0	0	0	0	0	0	0	0	0	0	0	0	0	0	0	0	0	6	0	0
>k141_1336142	456	0	0	0	0	0	0	0	0	0	0	0	0	0	0	5	0	0	0	0	0	9	0	0	0	0	0	0	0	0	0	0	0	0	0	0
>k141_1340382	1314	0	0	0	0	0	0	0	0	0	0	0	0	0	0	1	0	0	0	0	0	1	0	0	0	0	0	0	0	54	0	0	0	0	0	0
>k141_1349310	657	0	0	0	0	0	0	0	0	0	0	0	0	0	0	3	0	0	0	0	0	15	0	0	0	0	0	0	0	6	0	0	0	0	0	0
>k141_1354560	369	0	0	0	0	0	0	1	0	0	0	0	0	0	0	6	0	0	0	0	0	7	0	0	0	0	0	0	0	0	0	0	2	0	0	0

## Sheet: RNA Virus
Name	Contig Length	T06_1	T06_2	T06_3	T06_4	T06_5	T06_7	T06_9	T07_1	T07_2	T07_3	T07_4	T07_5	T07_6	T07_8	T07_9	T08_1	T08_2	T08_4	T08_5	T08_8	T08_9	T09_1	T09_3I	T09_4	T09_5I	T09_6	T09_7	T09_8	T10_1	T10_2	T10_3I	T10_4	T10_6	T10_7I	T10_9
Library		22033842	24534622	23412238	24033944	27980378	13425780	17912022	13338200	21803172	22600242	26571748	22896412	25750650	28306452	29337992	25120262	23764324	22226606	20170794	21620630	23023364	25330788	22391750	24765564	24056566	24555732	23421504	26022064	32443414	24402058	23140306	30110592	25919334	40840684	15009046
>k141_43120	1497	0	0	0	0	0	0	0	0	0	0	0	0	0	0	7	0	4	0	0	2	1610	5	0	2	2	2	0	0	0	0	0	3	5	0	26
>k141_801074	459	0	0	0	0	0	0	2	0	0	0	0	0	6	0	8	2	3	0	2	50	15	406	91	211	28	0	8	8	106	2	0	59	2	0	2
>k141_5908	1473	0	8	0	2	19	0	0	0	0	0	0	27	33	18	0	0	0	0	0	0	0	0	0	0	0	0	0	0	0	0	0	0	0	0	0
>k141_14170	543	0	0	0	0	0	0	0	0	0	0	0	0	0	0	0	0	0	0	0	0	0	0	0	0	0	111	0	0	0	0	0	9	2	0	0
>k141_15331	483	0	0	0	0	0	0	0	0	0	0	0	0	0	0	0	0	0	0	0	0	0	1	0	0	0	0	0	0	202	0	0	0	0	0	0
>k141_25753	1233	0	0	0	0	0	0	0	0	0	0	0	0	0	0	2	33	0	99	2	0	0	47	8	34	0	0	0	0	11	2	0	9	2	0	0
>k141_30799	873	0	0	0	0	0	0	0	0	0	0	0	14	11	0	8	0	0	0	0	0	11	0	0	0	0	0	0	0	0	0	0	0	15	0	2
>k141_36433	345	0	0	0	0	0	0	0	0	0	0	0	0	0	0	0	0	0	0	0	0	8	0	0	0	0	0	0	0	0	0	0	0	0	0	0
>k141_38006	954	0	0	0	0	0	0	0	0	0	0	0	0	0	0	4	2	2	8	0	0	2	0	0	0	0	0	0	0	2	0	0	2	2	0	0
>k141_41662	228	0	0	0	0	0	0	0	0	2	0	0	0	0	0	0	0	0	0	1	0	0	0	0	0	0	0	0	0	0	0	0	0	0	0	0
>k141_44868	747	0	0	0	0	0	0	0	0	0	0	0	0	0	0	0	0	0	0	0	0	0	0	0	0	0	0	0	0	4	0	0	0	2	0	11
>k141_53723	585	0	0	0	0	0	0	0	0	0	0	0	0	0	0	0	0	0	0	0	4	12	0	0	0	0	0	0	0	0	0	0	0	0	0	0
>k141_60636	1488	2	0	0	2	0	0	0	34	0	67	117	0	0	0	8	0	0	4	0	0	5	28	10	57	0	0	0	0	64	0	0	4	0	0	5
>k141_78366	768	0	0	0	0	0	0	0	0	0	0	0	0	0	0	0	18	0	0	0	0	17	2	0	0	0	0	0	0	2	0	0	0	0	0	4
>k141_87940	543	0	0	0	0	0	0	0	0	0	0	0	0	0	0	0	0	0	0	0	0	18	0	0	0	0	0	0	0	0	0	0	0	0	0	0
>k141_91068	390	0	0	0	0	0	0	0	0	0	0	0	0	7	0	0	0	0	0	0	0	2	0	0	0	0	0	0	0	0	0	0	0	5	0	0
>k141_95304	378	0	0	0	0	0	0	0	0	0	0	0	0	0	2	0	0	0	0	0	0	9	0	0	0	0	0	0	0	2	0	0	0	7	0	1
>k141_113935	1491	0	0	0	0	0	0	0	0	0	0	0	0	2	0	8	0	0	0	0	0	369	0	0	0	0	0	0	0	0	0	0	0	38	0	15
>k141_130805	1500	0	0	0	0	0	0	0	21	0	12	42	6	0	0	12	2	2	10	0	0	12	6	0	8	0	0	0	0	9	0	0	12	0	0	0
>k141_137200	543	0	0	0	0	0	0	0	0	0	2	0	0	0	0	0	0	4	0	0	3	0	7	0	0	0	0	0	0	2	4	0	0	0	0	0
>k141_148250	396	0	0	0	0	0	0	0	0	0	0	0	0	0	2	10	0	0	0	0	0	2	0	0	0	0	0	0	0	0	2	0	0	2	0	0
>k141_170276	852	4	0	0	8	0	0	0	0	0	0	0	0	0	0	16	0	0	2	0	2	12	0	0	0	0	0	0	0	0	0	0	0	0	0	0
>k141_185582	657	0	0	0	0	0	0	0	0	0	0	0	0	4	0	17	0	0	0	0	0	9	0	0	0	0	0	0	0	0	0	0	0	5	0	0
>k141_191746	753	0	0	0	0	0	0	0	0	0	0	0	0	2	0	21	0	0	0	0	0	0	0	0	0	0	0	0	0	0	0	0	0	2	0	4
>k141_195441	1476	0	0	0	0	0	0	0	0	0	0	0	0	0	0	0	0	0	0	0	0	0	6	80	10	23	0	38	38	2	0	0	2	0	0	0
>k141_206217	1041	0	0	0	0	0	0	0	0	0	0	0	0	0	0	3	0	0	0	0	0	6	11	0	0	0	0	0	0	70	2	0	0	4	0	2
>k141_207243	1209	0	0	0	0	0	0	0	0	0	0	0	0	0	0	0	0	0	0	0	0	0	2	27	0	0	0	0	0	0	0	0	0	0	0	0
>k141_226915	528	0	0	0	0	0	0	0	0	0	21	28	0	0	0	0	0	0	0	0	0	0	0	0	0	0	0	0	0	2	0	0	2	1	0	0
>k141_232757	843	0	0	0	0	0	0	0	0	0	0	0	0	4	0	18	0	0	2	0	0	6	7	3	4	0	0	0	0	6	2	0	2	10	0	0
>k141_233900	1365	0	0	0	0	0	0	0	0	0	0	0	0	0	0	45	0	4	0	2	0	88	0	0	0	4	0	0	0	2	0	0	0	3	0	8
>k141_254204	1011	0	0	2	0	0	0	0	0	0	0	0	0	5	0	22	0	0	0	0	0	16	0	0	0	0	0	0	0	0	0	0	0	27	0	4
>k141_256004	705	0	0	0	0	0	0	0	0	0	0	0	0	6	0	6	0	0	0	0	0	3	6	0	0	0	0	0	0	0	0	0	0	22	0	0
>k141_277000	507	0	0	0	0	0	0	0	0	0	0	0	0	0	0	0	4	0	0	0	0	0	33	2	3	0	0	0	0	0	0	0	0	0	0	0
>k141_281436	348	0	0	0	0	0	0	0	0	0	0	0	0	0	2	2	0	0	0	0	0	6	0	0	0	0	0	0	0	0	0	0	0	2	0	0
>k141_282165	474	0	0	0	0	0	0	0	0	0	0	0	0	0	0	0	0	0	0	0	0	0	0	0	0	0	0	0	0	0	0	0	0	18	0	2
>k141_282181	411	0	0	0	0	0	0	0	0	0	2	10	0	0	0	0	0	0	0	0	0	1	0	0	0	0	0	0	0	0	0	0	0	0	0	0
>k141_284002	288	0	0	0	0	0	0	0	0	0	0	0	0	0	0	5	0	0	0	0	0	2	4	0	0	0	0	0	0	0	0	0	0	1	0	0
>k141_286087	381	2	0	0	5	0	2	0	0	0	0	0	0	0	0	10	0	0	0	0	0	2	0	0	0	0	0	0	0	0	0	0	0	0	0	0
>k141_286709	1044	0	0	0	0	0	0	0	0	0	0	0	0	0	0	0	6	2	35	0	0	0	150	0	2	0	0	0	0	4	0	0	2	0	2	0
>k141_287170	372	0	0	0	0	0	0	0	0	0	0	0	0	0	0	5	0	0	0	0	0	8	0	0	0	0	0	0	0	0	0	0	0	2	0	2
>k141_292586	1428	0	0	0	0	0	0	0	0	0	0	0	0	0	0	0	0	3	0	1	4	352	0	0	0	0	3	0	0	0	0	0	0	28	0	38
>k141_305156	297	0	0	0	0	0	0	0	0	0	0	0	0	2	0	1	0	0	0	0	0	2	6	0	0	0	0	0	0	0	0	0	0	0	0	0
>k141_305819	1500	0	0	0	0	0	0	0	0	0	0	0	0	0	0	23	0	0	0	0	0	67	17	0	0	0	0	0	0	2	0	0	0	41	0	0
>k141_306515	1056	0	0	0	0	0	0	0	0	0	6	0	0	8	2	18	0	0	0	0	2	22	53	0	2	0	0	0	0	13	0	0	2	2	0	2
>k141_319193	1488	0	0	0	0	0	0	0	0	0	0	0	0	0	0	4	0	0	0	2	0	168	0	0	0	0	0	0	0	0	0	0	0	14	0	14
>k141_336403	1341	0	0	0	0	0	0	0	0	0	0	0	0	6	2	6	0	0	0	0	2	8	2	860	9	0	0	0	0	0	0	1	0	10	0	0
>k141_337676	1281	2	0	0	0	4	0	0	0	0	2	0	2	34	8	101	0	6	0	0	0	38	0	0	0	0	2	0	0	0	0	0	0	8	0	2
>k141_347421	396	0	0	0	0	0	0	0	0	0	0	0	0	0	0	2	0	0	0	0	0	2	8	0	0	0	0	0	0	0	0	0	0	0	0	0
>k141_348797	489	3	0	0	3	0	0	0	5	0	2	3	0	0	0	6	2	0	1	0	0	0	4	3	6	0	0	0	0	27	2	0	17	0	0	2
>k141_349463	1422	0	2	0	0	0	0	0	0	2	0	0	4	3	0	62	0	6	0	0	0	86	0	0	0	0	0	0	0	0	6	0	0	18	0	19
>k141_359508	345	5	0	0	2	0	0	0	8	2	3	7	1	0	0	2	0	1	3	0	0	0	1	0	9	0	0	0	0	12	3	2	12	0	0	0
>k141_375547	1277	0	0	0	0	6	0	0	0	0	0	0	0	24	0	42	0	0	0	0	0	29	0	0	0	0	2	0	0	0	0	0	0	47	0	4
>k141_379322	1506	0	0	0	0	0	0	0	0	0	0	0	0	0	0	0	8	29	0	0	0	0	7	2	2	0	0	0	0	0	0	0	5	0	0	0
>k141_387971	699	0	0	0	0	0	0	0	0	0	0	0	0	0	0	0	0	2	0	0	0	125	0	0	0	0	0	0	0	0	0	0	0	14	0	7
>k141_390752	243	0	0	0	0	0	0	0	0	0	0	0	0	0	0	8	0	0	0	0	0	0	0	0	0	0	0	0	0	0	0	0	0	0	0	0
>k141_392647	648	0	0	0	0	0	0	0	0	0	0	0	0	39	2	45	0	0	0	0	0	0	0	0	0	0	0	0	0	0	0	0	0	0	0	0
>k141_398419	300	0	0	0	0	0	0	0	0	0	0	0	0	0	0	2	0	0	0	0	0	6	0	0	0	0	0	0	0	0	0	0	0	2	0	0
>k141_401039	1599	0	0	0	0	1	0	0	0	0	31	19	0	0	1	11	39	72	39	6	126	2	83	8	14	0	0	0	0	66	14	0	60	73	0	9
>k141_402368	522	0	0	0	0	0	0	0	0	1	0	0	0	0	0	0	0	0	0	0	0	24	3	2	0	0	0	0	0	1	0	0	0	3	0	4
>k141_403231	1515	4843	68	61	658	49	4	2369	630	36	4452	8755	64	80	120	340	286	192	186	36	110	1100	238	39	184	0	25	0	0	2729	385	41	1200	207	0	400
>k141_408683	423	0	0	0	0	0	0	0	0	0	0	0	0	0	0	5	0	0	0	0	0	5	0	0	0	0	0	0	0	0	0	0	0	0	0	2
>k141_414300	639	0	0	0	0	0	0	0	0	0	0	0	0	14	0	2	0	0	0	0	0	0	0	0	0	0	0	0	0	0	0	0	0	0	0	1
>k141_418867	465	0	0	0	0	0	0	0	0	0	0	0	0	0	0	0	0	0	0	0	0	1	0	0	0	0	0	0	0	0	0	0	0	0	0	9
>k141_420721	420	0	0	0	0	0	0	0	0	0	0	0	0	0	0	9	0	0	0	0	0	15	0	0	0	0	0	0	0	0	0	0	0	0	0	3
>k141_421292	1452	0	0	0	0	0	0	0	0	0	0	0	0	0	0	0	83	12	101	0	0	0	0	26	4	0	0	4	4	0	0	0	0	0	0	0
>k141_424193	990	0	1	0	0	0	0	0	0	0	0	0	0	8	0	38	0	2	0	0	0	31	0	0	0	0	0	0	0	0	0	0	0	3	0	3
>k141_438579	243	0	0	0	0	0	0	0	0	0	0	0	0	0	0	2	0	0	0	0	0	4	0	0	0	0	0	0	0	0	0	0	0	1	0	0
>k141_441581	1404	0	0	0	0	0	0	0	0	0	0	0	0	0	0	0	0	0	0	0	0	0	0	0	0	0	338	0	0	5	2	0	14	4	0	0
>k141_443605	327	4	2	0	32	0	0	0	54	0	26	55	5	2	0	0	0	0	3	0	0	0	17	15	52	0	0	0	0	229	21	0	125	4	1	0
>k141_445575	333	0	0	0	0	0	0	0	0	0	0	0	0	0	0	2	0	0	0	0	0	4	0	0	0	0	0	0	0	0	0	0	0	2	0	0
>k141_449405	1464	11	0	0	1	4	0	0	0	0	2	0	0	114	14	992	0	0	0	0	2	825	0	0	0	0	2	0	0	0	0	0	0	56	0	68
>k141_452465	1062	2	0	0	0	4	0	0	0	0	0	0	0	2	4	105	0	0	0	0	0	22	0	0	0	0	0	0	0	0	0	0	0	8	0	13
>k141_455394	312	0	0	0	0	0	0	0	0	0	0	0	0	0	0	7	0	0	0	0	0	2	0	0	0	0	0	0	0	0	0	0	0	0	0	0
>k141_463969	441	0	0	0	0	0	0	0	0	0	0	0	0	0	0	0	0	0	0	0	2	15	1	0	0	0	0	0	0	3	0	0	0	2	0	2
>k141_464233	492	0	0	0	0	0	0	0	0	0	0	0	0	0	0	58	0	0	0	0	0	19	0	0	0	0	0	0	0	0	0	0	0	4	0	1
>k141_466291	600	1	0	0	0	2	0	0	0	0	0	0	0	3	0	7	0	0	0	0	0	6	0	0	0	0	0	0	0	0	0	0	0	3	0	2
>k141_467281	486	2	0	0	0	0	0	0	0	0	0	0	0	0	0	2	0	0	0	0	0	6	0	0	0	0	0	0	0	0	0	0	0	0	0	0
>k141_469423	450	185	2	6	20	2	0	76	17	0	58	224	4	0	7	15	11	0	7	0	5	49	12	4	3	0	1	0	0	161	20	2	51	17	0	26
>k141_487339	483	0	0	0	0	0	0	0	0	0	0	0	0	0	0	25	0	0	0	0	0	0	8	0	0	0	0	0	0	6	0	0	0	9	0	4
>k141_487709	351	0	0	0	0	0	0	0	0	0	0	0	0	0	0	0	0	0	0	0	0	28	0	0	0	0	1	0	0	0	0	0	0	11	0	13
>k141_492572	630	0	0	0	0	0	0	0	0	0	0	0	0	5	0	31	0	0	0	0	0	0	0	0	0	0	0	0	0	0	0	0	0	0	0	0
>k141_499976	408	0	0	0	0	0	0	0	0	0	0	0	0	0	0	0	3	0	7	0	0	3	0	0	0	0	0	0	0	0	2	0	0	0	0	0
>k141_505204	997	0	0	0	0	0	0	0	0	0	0	0	0	0	0	44	0	0	0	0	0	2	0	0	0	0	0	0	0	0	0	0	0	0	0	0
>k141_505406	1011	113	2	9	147	0	8	22	820	11	142	384	65	4	2	9	40	18	118	4	2	4	255	110	318	0	0	0	0	1439	92	10	1288	13	8	10
>k141_508708	1239	13	0	0	0	0	0	1	8	0	87	61	8	0	0	10	0	2	0	0	0	12	0	0	0	0	0	0	0	4	0	0	0	2	0	0
>k141_514220	345	0	0	0	0	0	0	0	0	0	0	5	0	0	0	0	0	0	0	0	0	0	6	0	6	0	0	0	0	8	0	0	0	0	0	0
>k141_519336	1443	0	0	0	0	0	0	0	0	0	0	0	0	0	0	19	6	0	2	1	2	305	1	0	4	0	2	0	0	4	0	0	0	9	0	17
>k141_540791	1137	0	0	0	0	0	0	0	0	0	0	0	0	4	0	61	0	0	0	0	0	16	0	0	0	0	0	0	0	0	0	0	0	12	0	4
>k141_543948	606	0	0	0	0	0	0	0	0	0	0	0	0	0	0	0	0	0	0	0	0	2	8	0	12	0	0	0	0	0	0	0	0	0	0	0
>k141_548130	981	26	1	2	64	0	0	2	207	2	91	211	13	0	0	0	5	4	9	0	0	0	94	64	245	0	0	0	0	774	70	6	609	10	0	0
>k141_554507	600	0	0	0	0	0	0	0	0	0	0	0	0	4	0	14	0	0	0	0	0	6	0	0	0	0	0	0	0	0	0	0	0	4	0	2
>k141_558874	693	0	0	0	2	0	0	0	0	0	0	0	0	9	9	27	0	0	0	0	0	12	3	0	4	0	0	0	0	3	0	0	0	17	0	4
>k141_562773	354	0	0	0	0	0	0	0	0	0	0	0	0	6	0	5	0	0	0	0	0	1	0	0	0	0	0	0	0	0	0	0	0	6	0	0
>k141_570720	1164	0	0	0	0	0	0	0	0	0	0	0	0	0	0	0	20	45	6	0	8	121	46	0	2	0	2	0	0	0	4	2	2	2	0	8
>k141_575584	1239	0	0	0	0	0	0	0	0	0	0	0	0	0	0	42	0	0	0	0	0	50	0	0	0	0	0	0	0	0	0	0	0	0	0	1
>k141_578107	813	0	0	0	0	0	0	0	0	0	0	0	0	0	0	0	0	0	0	0	0	0	0	0	0	0	0	0	0	11	0	0	2	26	0	0
>k141_580528	330	0	0	0	0	0	0	0	0	0	0	0	0	0	0	0	0	0	0	0	0	8	0	0	0	0	0	0	0	0	0	0	0	2	0	0
>k141_585037	624	0	0	0	0	0	0	0	0	0	0	0	0	2	0	1	0	0	0	0	0	20	0	0	0	0	0	0	0	0	0	0	0	0	0	0
>k141_588609	351	0	0	0	0	0	0	0	0	0	0	0	0	0	0	5	0	0	0	0	0	0	0	0	0	0	0	0	0	0	0	0	0	0	0	0
>k141_593265	1044	2	0	0	0	0	0	0	0	0	0	0	0	6	1	11	0	0	2	0	2	32	3	0	4	0	2	0	0	4	0	0	2	16	0	2
>k141_599584	333	0	0	0	0	0	0	0	0	0	0	0	0	0	0	0	0	0	0	0	0	3	0	0	2	0	0	0	0	0	0	0	0	3	0	0
>k141_605991	1374	0	25	0	0	4	0	2	335	415	312	400	25	35	220	6	0	6	4	0	0	2	3	0	10	33	2	2	2	138	58	100	48	2	14	0
>k141_611058	1488	0	0	0	0	0	0	0	0	0	0	0	6	10	5	65	0	2	0	6	2	162	0	0	0	0	39	0	0	14	20	0	0	321	0	30
>k141_612253	369	0	0	0	0	0	0	0	0	0	0	0	0	0	0	0	0	0	0	0	0	0	6	2	1	0	0	0	0	0	0	0	0	0	0	0
>k141_612670	801	0	0	0	0	0	0	0	0	1	0	0	0	0	0	0	0	1	0	0	0	22	2	0	2	2	2	0	0	32	0	0	0	4	0	0
>k141_641337	360	0	0	0	0	0	0	0	0	0	0	0	0	0	0	2	2	0	0	0	4	0	0	0	0	0	0	0	0	0	0	0	0	0	0	0
>k141_645853	795	0	0	0	0	0	0	0	0	0	0	0	0	0	0	15	0	0	0	0	0	1	0	0	0	0	0	0	0	0	0	0	0	4	0	0
>k141_650096	1050	0	0	0	0	0	0	0	0	0	0	0	0	0	0	2	0	0	0	0	0	78	0	0	0	0	0	0	0	0	0	0	0	0	0	1
>k141_654033	852	0	0	0	0	0	0	0	0	0	0	0	0	4	0	47	0	0	0	0	0	6	0	0	0	0	0	0	0	0	0	0	0	2	0	11
>k141_659546	834	0	0	0	0	0	0	0	0	0	0	0	0	0	0	2	0	0	0	0	0	0	0	0	0	0	17	0	0	13	2	0	11	0	0	0
>k141_659951	813	0	0	0	0	2	0	0	0	0	0	0	0	0	0	36	0	2	0	0	0	26	0	0	0	0	0	0	0	0	0	0	0	0	0	2
>k141_660201	645	0	0	0	0	0	0	0	0	0	0	0	0	0	0	18	0	0	0	0	0	7	0	0	0	0	0	0	0	0	0	0	0	0	0	1
>k141_667143	1134	0	0	0	0	0	0	0	0	0	0	2	0	0	0	34	0	0	2	0	0	13	0	0	0	0	0	0	0	84	79	6	279	9	8	0
>k141_667730	1350	14	0	0	14	0	0	6	0	0	0	2	0	0	0	25	0	0	0	0	0	11	0	0	0	0	0	0	0	4	0	0	2	0	0	0
>k141_669389	1560	0	0	0	0	2	0	0	0	0	0	0	0	6	0	77	0	0	0	0	0	40	0	0	0	2	0	0	0	0	0	0	0	9	0	8
>k141_676470	996	0	0	0	0	0	0	0	0	0	0	0	0	0	2	0	0	0	0	0	0	2	22	2	0	0	0	0	0	8	0	0	0	11	0	1
>k141_677631	1257	1	0	0	0	0	0	0	0	0	0	0	0	14	6	41	0	0	0	0	0	6	0	0	0	0	0	0	0	0	0	0	0	25	0	3
>k141_677814	264	0	0	0	0	0	0	0	0	0	0	0	0	0	2	0	0	0	0	0	0	2	0	0	0	0	0	0	0	0	0	0	0	1	0	0
>k141_679681	1458	0	0	0	0	0	0	0	0	0	0	0	0	0	0	0	0	2	1	0	10	51	0	0	0	0	0	0	0	0	0	0	0	2	2	2
>k141_680794	963	0	0	0	0	0	0	0	0	0	0	0	0	0	0	2	10	0	6	0	5	1	14	0	0	0	0	0	0	8	0	0	2	0	0	0
>k141_708451	1011	70	4	0	355	0	4	9	476	6	308	626	37	0	0	2	7	4	13	2	0	0	206	125	652	0	0	0	0	2392	159	30	1743	18	5	0
>k141_709087	474	0	0	0	0	0	0	0	0	0	0	0	0	2	0	0	0	0	0	0	0	5	0	0	0	0	0	0	0	0	0	0	0	4	0	6
>k141_709096	306	0	0	0	0	0	0	0	0	0	0	0	0	0	0	0	2	0	0	0	0	0	0	0	0	0	0	0	0	0	0	0	0	0	0	0
>k141_711860	396	0	0	0	0	0	0	0	0	0	0	0	0	0	0	6	0	0	0	0	0	0	0	0	0	0	0	0	0	0	0	0	0	0	0	0
>k141_715446	1455	0	0	0	0	0	0	0	0	0	0	0	0	0	0	0	0	0	0	0	0	0	0	0	0	0	0	0	0	77	6	4	189	0	0	0
>k141_719693	411	0	0	0	0	0	0	0	0	0	4	2	0	0	0	0	0	0	0	0	0	0	0	2	0	0	0	0	0	7	0	0	2	0	0	1
>k141_723086	696	0	0	0	0	0	0	0	0	0	0	0	0	0	0	0	0	1	0	0	0	95	1	0	0	0	0	0	0	0	0	0	0	16	0	35
>k141_723549	1413	0	0	0	0	0	0	0	0	0	0	0	0	0	0	34	0	0	0	0	0	115	0	0	0	0	0	0	0	0	0	0	0	0	0	10
>k141_727424	399	0	0	0	0	0	0	0	0	0	0	0	0	0	0	0	0	0	0	0	0	10	0	0	0	0	0	0	0	0	0	0	0	0	0	2
>k141_730892	303	0	0	0	0	0	0	0	0	0	0	2	0	0	2	0	0	0	0	0	0	0	0	0	0	0	0	0	0	0	0	0	0	0	0	0
>k141_735225	501	0	0	0	0	0	0	0	0	0	0	0	0	0	0	0	0	0	0	0	0	6	0	0	0	0	0	0	0	13	0	0	0	9	0	0
>k141_736732	1407	0	0	0	0	0	0	0	52	0	4	0	5	2	2	61	0	0	1	0	0	12	0	0	0	0	0	0	0	0	0	0	0	0	0	0
>k141_738821	1461	0	0	0	0	0	0	0	0	0	0	0	0	2	0	3	38	28	44	10	7	25	6	4	8	0	0	0	0	4	0	0	6	8	0	0
>k141_739107	768	4	0	0	2	2	0	0	0	0	4	2	0	0	0	16	0	2	0	0	0	9	0	0	0	0	0	0	0	2	0	0	0	38	0	0
>k141_740188	567	0	0	0	0	0	0	0	0	0	0	0	0	0	0	3	0	0	0	0	0	41	0	0	0	1	0	0	0	0	0	0	0	0	0	0
>k141_740870	696	0	0	0	0	0	0	0	0	0	0	0	0	0	0	25	0	0	0	0	0	6	0	0	0	0	0	0	0	0	0	0	0	4	0	2
>k141_743105	405	0	0	0	0	0	0	0	0	0	0	0	0	0	0	1	0	0	0	0	0	0	5	0	1	0	0	0	0	5	0	2	0	4	0	0
>k141_744337	555	0	0	0	0	0	0	0	0	0	0	0	0	0	0	0	0	0	0	0	0	19	0	0	0	0	0	0	0	0	0	0	0	0	0	0
>k141_756527	501	0	0	0	0	0	0	0	0	0	0	0	0	0	0	9	0	0	0	0	0	2	3	0	0	0	0	0	0	3	0	0	0	13	0	0
>k141_763132	366	0	0	0	0	0	0	0	0	0	0	0	0	1	0	10	0	0	0	0	0	0	0	0	0	0	0	0	0	0	0	0	0	0	0	0
>k141_766146	402	0	0	0	0	0	0	0	0	0	0	0	0	0	0	8	0	0	0	0	0	11	8	0	0	0	0	0	0	1	0	0	0	3	0	4
>k141_766240	1443	0	0	0	0	0	0	0	6	0	6	28	0	0	0	2	4	4	6	0	0	0	0	6	12	0	0	6	6	29	6	1	59	14	2	6
>k141_773490	1056	24	8	2	14	0	0	0	22	0	0	3	1	37	115	94	0	2	2	0	2	28	16	2	0	0	2	0	0	5	0	0	0	37	0	3
>k141_778292	996	0	0	0	0	0	0	0	0	0	0	0	0	5	4	0	0	0	0	0	0	82	178	16	14	0	1	2	2	0	0	0	4	11	0	0
>k141_782221	789	0	0	0	6	0	0	0	0	0	9	12	0	0	0	0	0	0	0	0	0	0	0	0	0	0	0	0	0	8	0	0	0	0	0	0
>k141_805761	426	0	0	0	0	0	0	0	0	0	0	0	0	0	0	0	0	0	0	0	0	0	0	0	0	0	0	0	0	1	2	0	6	0	0	2
>k141_808394	282	0	0	0	0	0	0	0	0	0	0	0	0	0	0	0	0	1	0	0	0	0	14	0	0	0	0	0	0	0	0	0	1	0	0	0
>k141_814010	636	0	2	0	0	0	0	0	0	0	0	0	0	0	0	29	0	0	0	0	0	8	0	0	0	0	4	0	0	0	0	0	0	8	0	0
>k141_815040	429	0	0	0	0	0	0	0	0	13	0	0	0	0	0	1	0	0	0	0	0	0	0	0	0	0	0	0	0	0	0	0	0	0	0	0
>k141_821026	735	0	0	0	0	0	0	0	0	0	0	0	2	0	0	3	0	4	1	0	0	17	6	0	0	0	0	0	0	0	0	0	0	0	0	2
>k141_821878	348	0	0	0	0	0	0	0	0	0	0	0	0	0	0	0	0	0	0	0	0	0	3	0	0	0	0	3	3	4	0	0	0	0	0	0
>k141_826122	1428	0	0	0	0	0	0	0	0	0	0	0	0	0	0	18	0	0	0	0	0	9	0	0	0	0	0	0	0	28	0	0	96	7	0	4
>k141_827163	447	0	0	0	0	0	0	0	0	0	0	0	0	0	0	7	0	0	0	2	0	3	0	0	0	0	0	0	0	0	0	0	2	2	0	2
>k141_830097	297	0	0	0	0	0	0	0	0	0	0	4	0	0	0	0	0	0	0	0	2	0	5	0	0	0	0	0	0	0	0	0	0	0	0	0
>k141_830298	486	0	0	0	0	0	0	0	0	0	0	0	0	0	0	2	0	0	0	0	0	2	0	0	0	0	0	0	0	0	1	0	14	2	0	0
>k141_832652	609	0	0	0	0	0	0	0	0	0	0	0	0	0	0	0	14	4	4	0	30	2	16	3	6	0	0	2	2	23	4	0	7	11	0	1
>k141_838625	228	0	0	0	0	0	0	0	0	0	0	0	0	0	0	4	0	0	0	0	0	6	0	0	0	0	0	0	0	0	0	0	0	2	0	0
>k141_845427	1383	0	0	0	0	0	0	0	0	0	0	0	0	0	0	0	0	0	0	0	0	0	10	107	152	58	0	481	481	18	8	37	10	0	28	0
>k141_850539	564	4	0	0	0	0	0	0	0	0	0	0	0	0	0	12	10	4	6	0	0	16	263	18	36	0	0	0	0	1	0	0	0	0	0	0
>k141_852169	561	0	0	0	0	0	0	0	0	0	0	0	0	0	0	0	0	0	0	0	0	0	6	0	0	0	0	0	0	7	0	0	0	0	0	0
>k141_852639	396	0	0	0	0	0	0	0	0	0	0	0	0	0	0	6	1	1	0	0	0	16	0	0	0	0	0	0	0	6	0	0	0	0	0	0
>k141_858029	255	0	0	0	0	0	0	0	0	0	0	0	0	0	0	0	0	0	0	0	0	0	0	0	0	0	0	0	0	0	0	0	0	1	0	12
>k141_860655	608	2	0	0	0	0	0	0	0	0	0	0	0	2	0	12	0	0	0	0	0	12	0	0	0	0	0	0	0	0	0	0	0	4	0	2
>k141_861778	333	0	0	0	0	0	0	0	0	0	0	0	0	0	0	0	0	0	0	0	0	12	0	0	0	0	0	0	0	0	0	0	0	0	0	0
>k141_863491	681	0	0	0	0	0	0	0	1	0	0	0	0	0	0	3	0	4	0	4	2	32	2	0	0	0	0	0	0	4	0	0	0	11	0	2
>k141_875571	558	4	1	2	0	0	0	0	0	0	2	0	0	2	8	5	0	2	0	0	0	10	0	2	2	0	0	0	0	1	0	0	0	5	0	3
>k141_879493	408	0	0	0	0	0	0	0	0	0	0	0	0	0	0	0	0	0	0	0	0	5	0	0	0	0	0	0	0	0	0	0	0	2	0	1
>k141_886435	816	2	0	0	0	0	0	0	0	0	0	0	0	0	0	34	0	0	0	0	0	12	0	0	0	0	0	0	0	0	0	0	0	4	0	2
>k141_893459	528	0	0	0	0	0	0	0	0	0	0	0	0	7	0	2	0	0	0	0	0	0	0	0	0	0	0	0	0	0	0	0	0	6	0	0
>k141_894382	459	0	0	0	0	0	0	0	0	0	0	0	0	0	2	21	0	0	0	0	0	6	0	0	0	0	0	0	0	0	0	0	0	0	0	2
>k141_908845	1050	4	0	2	6	0	0	1	0	0	0	3	0	0	0	4	0	0	0	0	2	157	0	0	1	0	0	0	0	2	0	0	0	0	0	4
>k141_912065	507	0	0	0	0	0	0	0	0	0	0	0	0	0	0	0	0	0	0	0	0	12	0	0	0	0	0	0	0	0	0	0	0	0	0	0
>k141_915717	876	0	0	0	0	0	0	0	0	0	0	0	0	0	0	0	0	0	0	0	0	0	8	4	2	0	0	0	0	45	0	0	12	0	0	0
>k141_918860	1107	0	0	0	0	0	0	0	0	0	0	0	0	8	11	51	0	0	0	0	0	17	4	0	0	0	0	0	0	0	0	0	0	65	0	1
>k141_926267	1344	0	0	0	0	0	0	0	0	0	0	0	0	0	0	2	284	346	885	56	24	4	0	2	0	2	2	0	0	2	2	0	5	0	0	0
>k141_932109	372	0	0	0	0	0	0	0	0	0	0	0	0	2	0	0	0	0	0	0	0	4	1	0	0	0	0	0	0	0	0	0	0	0	0	0
>k141_941717	474	0	0	0	0	0	0	0	0	0	0	0	0	0	0	0	0	0	0	0	0	15	0	0	0	0	0	0	0	2	0	0	0	4	0	0
>k141_949304	1032	0	0	0	0	0	0	0	0	0	0	0	0	0	4	444	0	0	0	0	0	29	0	0	0	0	36	0	0	0	0	0	0	32	0	9
>k141_956979	1497	0	0	0	0	0	0	0	0	0	0	0	0	0	0	1	0	0	0	0	4	871	1	0	0	0	0	0	0	0	0	0	1	7	0	4
>k141_959318	480	0	0	0	0	0	0	0	0	0	0	0	0	0	0	8	0	0	0	0	0	4	0	0	0	0	0	0	0	0	0	0	0	0	0	0
>k141_961758	459	0	0	0	0	0	0	0	0	0	0	0	0	3	0	40	0	0	0	0	0	4	0	0	0	0	0	0	0	0	0	0	0	0	0	0
>k141_963458	675	0	0	0	0	0	0	0	0	0	1	0	2	0	0	1	0	0	0	4	2	38	2	0	0	0	0	0	0	4	0	0	0	9	0	2
>k141_964174	300	0	0	0	0	0	0	0	0	0	0	0	0	2	0	4	0	0	0	0	0	0	0	0	0	0	0	0	0	0	0	0	0	0	0	0
>k141_967522	690	0	0	0	0	0	0	0	0	0	0	0	0	0	0	20	0	0	0	0	0	4	2	0	0	0	0	0	0	0	0	0	0	0	0	0
>k141_968465	471	0	0	0	0	0	0	0	0	0	0	0	0	0	0	6	0	0	0	0	0	4	15	0	4	0	0	0	0	5	0	0	0	0	0	0
>k141_975353	504	0	0	0	0	0	0	0	0	0	0	0	0	0	0	2	0	0	0	0	0	34	0	0	0	0	0	0	0	0	0	0	0	3	0	2
>k141_983918	771	0	0	0	0	0	0	0	0	0	0	0	0	0	0	14	0	0	0	0	0	4	0	0	0	0	0	0	0	0	0	0	0	1	0	0
>k141_990885	1020	0	0	0	0	0	0	0	0	0	0	0	0	2	2	17	0	0	0	0	2	101	41	13	6	0	0	0	0	29	0	0	2	39	0	12
>k141_998709	666	0	0	0	0	0	0	0	0	0	0	0	0	0	0	32	0	0	0	0	0	10	0	0	0	0	2	0	0	0	0	0	0	0	0	2
>k141_999693	960	64	0	13	14	2	2	47	0	0	9	28	0	0	0	0	0	0	0	0	0	0	7	6	4	0	0	0	0	0	2	2	0	0	1	2
>k141_1000591	759	2	0	0	0	0	0	0	0	0	0	0	0	0	0	17	0	0	0	0	0	10	0	0	0	0	0	0	0	0	0	0	0	0	0	2
>k141_1001558	510	0	0	0	0	0	0	0	0	0	0	0	0	0	0	0	0	0	0	0	0	15	0	0	0	0	0	0	0	0	0	0	0	0	0	2
>k141_1019064	1560	0	0	0	0	0	0	0	0	0	0	0	0	0	0	96	0	0	0	0	0	138	0	0	0	0	0	0	0	0	0	0	0	14	0	6
>k141_1019208	798	2	0	0	0	0	0	0	0	0	0	4	0	0	0	0	2	8	0	0	0	0	2	0	7	0	0	0	0	12	0	0	0	0	0	0
>k141_1033279	231	0	0	0	0	0	0	0	0	0	0	0	0	0	0	0	0	0	0	0	0	4	0	0	0	0	0	0	0	0	0	0	0	0	0	0
>k141_1045643	1134	0	0	0	0	0	0	0	0	0	0	0	0	0	0	0	0	2	0	0	0	42	0	0	0	0	2	0	0	0	0	0	0	4	0	0
>k141_1045963	1374	0	0	0	0	0	0	0	0	0	0	0	0	0	0	0	49	4	0	0	0	0	0	0	0	6	2	0	0	2	0	0	32	2	0	0
>k141_1050893	633	0	0	0	0	0	0	0	0	0	0	0	0	0	0	0	0	0	0	0	0	0	0	0	0	0	0	0	0	0	0	0	0	29	0	0
>k141_1054215	306	0	0	0	1	0	0	2	0	0	0	2	0	0	0	0	0	2	0	0	0	0	0	0	0	0	0	0	0	0	5	0	0	0	0	0
>k141_1056623	342	2	0	0	0	0	0	0	0	0	0	0	0	0	0	22	0	0	0	0	0	6	0	0	0	0	0	0	0	0	0	0	0	2	0	3
>k141_1068667	576	0	0	0	0	0	0	0	0	0	0	0	0	0	0	0	0	0	0	0	0	0	0	18	0	0	0	0	0	0	2	0	0	0	0	0
>k141_1074700	864	0	0	0	0	0	0	0	0	0	0	0	2	49	6	2	0	0	0	0	0	0	0	0	0	0	0	0	0	0	0	0	0	11	0	0
>k141_1075858	501	0	0	0	0	0	0	0	0	0	0	0	0	0	0	0	0	0	0	0	0	0	1	2	21	5	0	19	19	4	0	3	8	0	10	0
>k141_1076199	876	11	0	0	2	0	0	2	0	0	0	12	0	0	0	0	0	0	0	0	0	0	0	0	0	0	0	0	0	0	0	0	0	0	0	0
>k141_1076620	321	0	0	0	0	0	0	0	0	0	0	0	0	4	0	1	0	0	0	0	0	2	0	0	0	0	0	0	0	0	0	0	0	3	0	0
>k141_1080763	1260	0	0	0	0	0	0	0	0	0	0	0	0	0	0	57	0	0	0	0	0	17	0	0	0	0	0	0	0	0	0	0	0	2	0	0
>k141_1096636	705	0	0	0	0	0	0	0	0	0	0	0	0	0	0	0	0	0	2	0	0	4	12	0	7	0	0	0	0	0	0	0	0	0	0	0
>k141_1101434	948	0	0	0	0	0	0	0	0	0	0	0	0	0	0	0	0	0	0	0	0	0	0	0	0	0	0	0	0	0	0	0	0	0	0	43
>k141_1102303	393	0	0	0	0	0	0	0	0	0	0	0	0	0	0	0	0	0	0	0	0	0	0	0	0	0	4	0	0	0	0	0	0	4	0	0
>k141_1102928	498	0	0	0	0	0	0	0	0	0	0	0	0	0	0	0	0	0	0	0	0	0	4	0	0	0	0	4	4	6	0	0	2	0	0	0
>k141_1103102	1026	0	0	0	0	0	0	0	0	0	0	0	0	0	4	2	0	0	0	0	0	20	2	0	0	0	2	0	0	2	0	0	0	3	0	3
>k141_1110000	351	0	0	0	0	0	0	0	0	0	0	0	0	0	0	2	0	0	0	0	0	3	0	0	0	0	0	0	0	0	0	0	0	0	0	2
>k141_1118663	648	0	0	0	0	0	0	0	0	0	0	0	0	21	0	0	0	0	0	4	0	0	0	0	0	0	0	0	0	0	0	0	0	2	0	0
>k141_1121199	480	0	0	0	0	0	0	0	0	0	0	0	0	0	0	0	0	0	0	0	17	0	0	0	0	0	0	0	0	0	0	0	0	0	0	0
>k141_1127897	225	1	0	0	0	0	0	0	0	0	0	0	0	4	4	3	0	0	0	0	0	0	2	0	0	0	0	0	0	1	0	0	0	5	0	0
>k141_1129779	606	2	0	2	5	0	0	0	0	0	0	0	0	0	0	6	0	0	0	0	0	63	0	0	1	0	0	0	0	2	0	0	2	0	0	0
>k141_1130067	513	0	0	0	0	0	0	0	0	0	0	0	0	12	14	0	0	0	0	0	0	4	0	0	0	0	0	0	0	0	0	0	0	6	0	2
>k141_1131480	471	0	0	0	0	0	0	0	0	0	0	0	0	4	2	0	0	0	0	0	0	0	0	0	0	0	0	0	0	0	0	0	0	8	0	0
>k141_1142045	1389	0	0	0	0	0	0	0	0	0	0	0	0	0	0	0	0	2	152	7	0	0	244	0	4	0	0	0	0	12	0	0	6	0	0	0
>k141_1143180	396	0	0	0	0	0	0	0	0	0	0	0	0	0	0	0	0	0	0	0	0	10	0	0	0	0	0	0	0	0	0	0	0	3	0	0
>k141_1145307	264	0	0	0	0	0	0	0	0	0	0	0	0	0	0	0	0	0	0	0	0	0	3	0	0	0	0	0	0	1	0	0	0	0	0	0
>k141_1150528	537	0	0	0	0	0	0	0	0	0	0	0	0	0	0	0	0	0	0	0	0	0	0	0	0	0	0	0	0	27	4	0	30	0	0	0
>k141_1168381	648	34	0	2	4	0	0	2	0	0	2	2	0	0	0	0	0	0	0	0	0	0	0	0	1	0	0	0	0	0	0	0	0	0	0	0
>k141_1175429	219	0	0	0	0	0	0	0	0	0	0	0	0	0	0	5	0	0	0	0	0	0	0	0	0	0	0	0	0	0	0	0	0	0	0	0
>k141_1183165	735	0	0	0	0	0	0	0	0	0	0	0	0	0	0	0	0	0	0	0	0	29	0	0	0	0	0	0	0	2	0	0	0	2	0	2
>k141_1185003	1035	0	0	0	0	0	0	0	0	0	0	0	0	0	0	2	0	0	0	0	0	4	127	10	0	0	0	0	0	4	0	0	0	5	0	0
>k141_1186170	369	0	0	0	0	0	0	0	0	0	0	0	0	0	0	9	0	0	0	0	0	0	0	0	0	0	0	0	0	0	0	0	0	0	0	0
>k141_1186368	417	0	0	0	0	0	0	0	0	0	0	0	0	0	2	0	0	0	0	0	0	3	0	2	0	0	0	0	0	0	0	0	0	0	0	0
>k141_1188709	1383	0	0	0	0	0	0	0	0	0	0	0	0	0	0	9	0	0	0	0	2	46	0	0	7	21	0	0	0	0	0	0	0	6	0	2
>k141_1190334	1023	0	0	0	0	0	0	0	0	0	0	0	0	0	0	2	0	0	0	0	0	157	0	0	4	0	0	2	2	0	0	0	2	2	0	0
>k141_1201825	1074	0	0	0	0	0	0	0	0	0	0	0	4	7	0	8	0	2	0	2	2	10	9	0	8	0	0	0	0	0	0	0	0	0	0	2
>k141_1205094	924	17	0	2	0	2	0	20	0	0	0	0	0	0	0	6	0	0	0	0	0	0	0	0	0	0	0	0	0	0	0	0	0	0	0	0
>k141_1207337	825	0	0	0	0	0	0	0	2	0	34	10	2	0	0	0	0	0	0	0	3	0	2	4	9	0	0	0	0	9	14	0	6	325	0	0
>k141_1208015	1420	0	0	0	0	0	0	0	0	0	0	0	0	31	0	103	0	0	0	0	0	23	0	0	0	0	0	0	0	0	0	0	0	10	0	1
>k141_1208779	777	4	0	0	0	0	0	0	0	0	0	0	1	0	12	14	0	0	0	0	0	2	0	0	0	0	0	0	0	0	0	0	0	23	0	4
>k141_1210506	525	0	0	0	0	0	0	0	0	0	0	0	0	0	0	0	0	0	0	0	0	12	6	0	0	0	0	0	0	0	0	0	0	0	0	0
>k141_1211760	357	0	0	0	0	0	0	0	22	0	2	3	2	0	0	1	2	0	2	0	0	0	5	3	5	0	0	0	0	36	4	0	31	0	0	0
>k141_1221826	900	0	0	0	0	0	0	0	0	0	0	0	0	0	0	7	0	6	2	0	0	28	20	3	6	0	2	0	0	30	2	0	0	9	0	3
>k141_1222291	783	0	0	0	0	0	0	0	0	0	0	0	0	6	0	22	0	0	0	0	0	3	0	0	0	0	0	0	0	0	0	0	0	13	0	1
>k141_1222702	429	0	0	0	0	0	0	0	0	0	0	0	0	4	0	16	0	0	0	0	0	0	0	0	0	0	0	0	0	0	0	0	0	0	0	0
>k141_1224840	1020	4	2	0	0	0	0	0	0	0	2	0	0	12	8	122	0	0	0	0	2	105	13	0	7	0	3	0	0	13	0	0	1	127	0	24
>k141_1228917	984	0	0	0	0	0	0	0	0	0	0	0	0	0	0	26	0	0	0	0	0	10	0	0	0	0	0	0	0	0	0	0	0	2	0	0
>k141_1229928	447	0	0	0	0	0	0	0	0	0	0	0	0	0	0	15	0	0	0	0	0	11	0	0	0	0	0	0	0	39	34	3	110	1	0	0
>k141_1231058	624	0	0	0	0	0	0	0	0	0	0	0	0	0	6	44	0	0	0	0	0	0	0	0	0	0	0	0	0	0	0	0	0	0	0	0
>k141_1238394	375	0	0	0	0	0	0	0	0	0	0	0	0	0	0	0	0	0	0	0	0	6	0	0	0	0	0	0	0	0	0	0	0	0	0	0
>k141_1239378	1680	0	0	0	0	0	0	0	0	0	0	0	0	0	0	0	0	0	0	0	0	0	146	2	2	2	0	2	2	0	0	0	0	0	0	0
>k141_1251496	705	0	0	0	0	0	0	0	0	0	0	0	0	0	0	71	0	0	0	0	0	0	0	0	0	0	0	0	0	0	0	0	0	0	0	6
>k141_1262264	558	0	0	0	0	0	0	0	0	0	0	0	0	0	0	0	0	0	0	0	0	3	0	2	11	12	0	0	0	2	0	0	2	0	0	0
>k141_1263232	1455	226	0	0	10	0	0	60	0	0	0	0	0	1	2	7	2	0	0	0	0	4	0	0	0	0	0	0	0	25	0	0	0	2	0	0
>k141_1267921	1155	0	0	0	0	0	0	0	0	0	0	0	0	8	2	30	0	0	0	0	0	31	0	0	0	0	0	0	0	0	0	0	0	5	0	0
>k141_1289131	435	2	9	0	3	0	0	0	2	0	2	0	2	0	0	0	0	0	0	0	0	0	0	0	0	0	0	0	0	2	0	0	0	0	0	7
>k141_1289788	402	0	0	0	0	0	0	0	0	0	0	0	0	0	0	0	0	0	0	0	0	0	0	0	0	0	0	0	0	0	0	0	0	3	0	0
>k141_1300619	180	0	0	0	0	0	0	0	0	0	0	0	0	0	0	0	0	0	0	0	0	0	0	0	0	0	0	0	0	0	0	0	0	4	0	0
>k141_1303039	915	0	0	0	0	0	0	0	2	0	6	5	0	0	0	0	3	5	47	2	32	2	16	7	15	0	0	0	0	75	0	0	8	8	0	2
>k141_1309166	306	0	0	0	0	0	0	0	0	0	0	0	0	0	0	0	0	0	0	0	0	16	0	0	0	0	0	0	0	0	0	0	0	0	0	0
>k141_1316482	327	0	0	0	0	0	0	0	0	0	0	0	0	0	0	0	0	0	0	0	0	0	0	0	0	0	0	1	1	0	0	0	0	8	0	0
>k141_1316488	300	0	0	0	0	0	0	0	0	0	0	0	0	0	0	4	0	0	0	0	0	2	0	0	0	0	0	0	0	0	0	0	0	0	0	0
>k141_1320236	333	0	0	0	0	0	0	0	0	0	0	0	0	0	0	6	0	0	0	2	0	5	2	0	0	0	0	0	0	5	0	0	0	5	0	2
>k141_1320326	642	134	2	2	16	0	0	6	0	0	2	2	0	0	0	0	0	0	0	0	0	0	0	0	0	0	0	0	0	0	0	0	0	0	0	0
>k141_1321042	249	0	0	0	0	0	0	0	0	0	0	0	0	0	0	0	0	0	0	0	0	0	0	0	0	0	0	0	0	0	0	0	0	4	0	2
>k141_1321405	174	0	0	0	0	0	0	0	0	0	0	0	0	0	0	9	0	0	0	0	0	3	0	0	0	0	0	0	0	0	0	0	0	0	0	2
>k141_1324424	1398	0	0	0	0	6	0	0	0	0	0	0	2	6	5	272	0	0	0	0	0	13	0	0	0	0	0	0	0	0	0	0	0	2	0	0
>k141_1324804	564	2	0	0	9	4	0	1	0	0	2	2	0	0	0	0	0	0	0	0	0	2	0	0	0	0	0	0	0	0	0	0	0	0	0	0
>k141_1328944	1122	0	0	0	0	0	0	0	0	0	0	0	0	0	0	61	0	0	0	0	0	22	0	0	2	0	0	0	0	4	0	0	0	16	0	13
>k141_1345822	210	0	0	0	0	0	0	0	0	0	0	0	0	0	0	5	0	0	0	0	0	0	0	0	0	0	0	0	0	0	0	0	0	0	0	0
>k141_1346053	1512	0	0	0	2	0	0	0	2	0	0	0	0	0	0	0	149	35	551	12	2	0	48	41	117	12	0	47	47	107	23	12	356	4	30	0
>k141_1346576	636	0	0	0	2	0	0	0	0	0	0	0	0	0	0	0	0	0	0	0	0	0	0	0	0	0	0	0	0	16	2	0	4	0	0	1
>k141_1347954	573	0	0	0	0	0	0	0	2	0	0	2	0	0	0	0	0	0	0	0	2	0	6	0	0	0	4	0	0	0	6	0	0	0	4	2
>k141_1353365	420	12	0	0	7	0	0	2	0	0	0	0	0	0	0	0	0	0	0	0	0	0	0	0	0	0	0	0	0	0	0	0	0	0	0	0
>k141_1354638	204	0	0	0	0	0	0	0	0	0	0	0	0	0	0	0	0	0	0	0	0	0	1	0	0	0	0	0	0	3	0	0	0	0	0	0

## Sheet: ssDNA Virus
Name	Contig Length	T06_1	T06_2	T06_3	T06_4	T06_5	T06_7	T06_9	T07_1	T07_2	T07_3	T07_4	T07_5	T07_6	T07_8	T07_9	T08_1	T08_2	T08_4	T08_5	T08_8	T08_9	T09_1	T09_3I	T09_4	T09_5I	T09_6	T09_7	T09_8	T10_1	T10_2	T10_3I	T10_4	T10_6	T10_7I	T10_9
Library		22033842	24534622	23412238	24033944	27980378	13425780	17912022	13338200	21803172	22600242	26571748	22896412	25750650	28306452	29337992	25120262	23764324	22226606	20170794	21620630	23023364	25330788	22391750	24765564	24056566	24555732	23421504	26022064	32443414	24402058	23140306	30110592	25919334	40840684	15009046
>k141_25769	375	2	0	0	1	0	0	0	3	0	0	3	0	0	0	4	2	0	2	2	0	0	2	0	0	0	0	0	0	12	0	0	18	0	0	1
>k141_61276	831	0	0	0	0	0	0	0	0	0	0	0	0	0	0	0	0	0	0	0	2	0	0	6	7	1	0	44	6	0	0	0	4	0	2	0
>k141_483908	330	4	2	3	4	0	0	0	0	0	0	0	0	0	0	0	0	0	0	0	0	0	0	0	0	0	0	0	0	0	0	0	0	0	0	0
>k141_506340	381	9	2	0	3	0	0	0	0	0	0	0	0	0	0	0	0	0	0	0	0	0	0	0	0	0	0	0	0	0	0	0	0	0	0	0
>k141_575987	552	0	0	0	0	0	0	0	0	0	0	0	0	0	0	21	0	0	0	0	0	0	0	0	0	0	0	0	0	0	0	0	0	0	0	0
>k141_673064	336	0	0	0	0	0	0	0	0	0	0	0	0	0	0	10	0	0	0	0	0	0	0	0	0	0	0	0	0	0	0	0	0	0	0	0
>k141_756792	480	0	0	0	0	2	0	0	0	0	0	0	0	0	0	0	0	0	0	0	0	15	0	0	0	0	0	0	0	0	0	0	0	0	0	0
>k141_898592	330	0	0	0	0	0	0	0	0	0	0	0	0	0	0	0	0	0	0	0	0	0	2	2	5	0	0	2	0	0	0	0	0	0	0	0
>k141_980838	600	0	0	0	0	0	0	0	1	0	0	0	0	0	0	0	0	0	0	0	0	0	0	0	0	0	0	0	0	37	0	0	2	0	0	0
>k141_991334	171	0	0	0	0	0	0	0	0	0	0	4	0	0	0	0	0	0	0	0	0	0	0	0	0	0	0	0	0	0	0	0	0	0	0	0
>k141_1044880	846	14	0	2	2	0	0	0	4	0	6	2	2	6	0	4	4	2	0	0	0	0	8	4	8	0	0	0	0	30	0	0	7	0	0	0
>k141_1126647	201	0	0	0	0	0	0	0	0	0	0	0	0	0	0	0	0	0	0	0	0	0	0	0	0	0	0	0	0	0	0	0	4	0	0	0
>k141_1145777	372	0	0	0	1	0	0	0	0	0	10	3	0	0	0	0	1	0	1	0	0	0	0	0	0	0	0	0	2	1	0	0	4	0	0	0
>k141_1184114	483	8	0	0	17	0	0	0	19	0	15	24	2	0	0	0	0	0	0	0	0	0	3	0	12	0	0	0	0	141	8	2	82	1	0	0
>k141_1250242	189	0	0	0	0	0	0	0	0	0	0	0	0	0	0	0	0	0	0	0	0	0	3	0	0	0	0	0	0	0	0	0	0	0	0	0
>k141_1277968	312	0	0	0	0	4	0	0	0	0	0	0	0	0	1	4	0	0	0	0	0	2	0	0	0	0	0	0	0	0	0	0	0	0	0	0
>k141_1312727	750	0	2	0	0	2	0	0	13	4	0	16	2	5	22	0	0	0	0	0	0	0	0	0	0	0	0	0	0	0	0	0	0	0	0	0

## Sheet: Virophage
Name	Contig Length	T06_1	T06_2	T06_3	T06_4	T06_5	T06_7	T06_9	T07_1	T07_2	T07_3	T07_4	T07_5	T07_6	T07_8	T07_9	T08_1	T08_2	T08_4	T08_5	T08_8	T08_9	T09_1	T09_3I	T09_4	T09_5I	T09_6	T09_7	T09_8	T10_1	T10_2	T10_3I	T10_4	T10_6	T10_7I	T10_9
Library		22033842	24534622	23412238	24033944	27980378	13425780	17912022	13338200	21803172	22600242	26571748	22896412	25750650	28306452	29337992	25120262	23764324	22226606	20170794	21620630	23023364	25330788	22391750	24765564	24056566	24555732	23421504	26022064	32443414	24402058	23140306	30110592	25919334	40840684	15009046
>k141_40044	363	1	0	0	0	0	0	0	0	0	0	2	0	0	0	0	0	0	0	0	0	1	0	0	0	0	0	0	0	2	0	0	0	0	0	0
>k141_85182	345	0	0	0	2	0	0	0	0	0	0	0	0	0	0	0	1	0	0	0	0	0	0	0	0	0	0	0	0	3	0	0	0	0	0	1
>k141_370692	204	0	0	0	0	0	0	0	0	0	0	0	0	0	0	0	0	0	0	0	0	0	0	0	0	0	0	0	0	3	0	0	4	0	0	0
>k141_567457	522	0	0	0	0	0	0	0	0	0	0	0	0	0	0	1	0	0	0	0	0	0	1	0	0	0	0	0	0	0	0	0	0	8	0	0
>k141_605667	210	0	0	0	0	0	0	0	0	0	0	0	0	0	0	0	0	0	0	0	0	0	0	0	0	0	0	0	0	0	0	0	1	0	0	0
>k141_615236	549	0	0	0	0	0	0	0	0	0	1	0	0	2	0	11	0	0	0	0	0	0	1	0	0	0	0	0	0	1	0	0	0	1	0	2
>k141_633957	234	4	0	0	1	0	0	0	0	0	0	0	0	0	0	1	0	0	0	0	0	0	0	0	0	0	0	0	0	0	0	0	0	1	0	0
>k141_644734	876	0	0	0	0	0	0	0	0	0	0	0	0	0	0	0	0	0	0	0	0	0	0	0	0	0	0	0	0	10	13	0	21	0	0	0
>k141_661161	414	0	0	0	0	0	0	0	0	0	1	0	0	0	0	4	2	0	0	0	0	0	20	0	1	0	0	0	0	1	0	0	0	0	0	0
>k141_671474	336	0	0	0	0	0	0	0	0	0	0	0	1	0	0	6	0	0	0	0	0	0	5	2	1	0	0	0	0	4	0	0	0	4	0	0
>k141_673317	459	0	0	0	0	0	0	0	0	0	1	0	0	0	0	5	0	0	0	0	0	0	4	0	0	0	0	0	0	3	0	0	0	6	0	2
>k141_687881	282	0	0	0	0	0	0	0	0	0	0	0	0	0	0	0	0	0	0	0	0	0	6	0	0	0	0	0	0	2	0	0	0	0	0	0
>k141_708091	183	0	0	0	0	0	0	0	0	0	0	0	0	0	0	2	0	0	0	0	0	0	0	0	0	0	0	0	0	0	0	0	0	1	0	1
>k141_790188	1002	1	0	0	0	0	0	0	2	0	0	0	0	0	0	0	0	0	0	0	0	0	0	2	2	0	0	0	0	8	2	0	11	0	0	2
>k141_817956	213	0	0	0	0	0	0	0	0	0	0	0	0	0	0	0	0	0	0	0	0	0	6	0	2	0	0	0	0	6	0	0	0	0	0	0
>k141_824326	270	0	0	0	0	0	0	0	0	0	0	0	0	0	0	0	0	0	0	0	0	0	0	2	3	0	0	0	0	0	0	0	0	0	0	0
>k141_824391	474	0	0	0	0	0	0	0	0	0	0	0	0	0	0	0	0	0	0	0	0	2	0	0	5	0	0	0	0	0	0	0	0	0	0	0
>k141_843867	315	0	0	0	0	0	0	0	0	0	2	0	0	0	0	0	0	0	2	0	0	2	8	0	1	0	0	0	0	0	0	0	0	0	0	0
>k141_916028	378	0	0	0	0	0	0	0	0	0	0	0	0	0	0	0	0	0	0	0	0	0	15	0	2	0	0	0	0	4	0	0	0	0	0	0
>k141_929436	297	0	0	0	0	0	0	0	0	0	0	0	0	0	0	0	0	0	0	0	0	0	0	0	0	0	0	0	0	1	0	0	5	0	0	1
>k141_1005863	402	0	0	0	0	0	0	0	0	0	0	0	0	0	0	0	1	0	1	0	0	0	10	0	0	0	0	0	0	6	0	0	0	4	0	0
>k141_1010596	318	0	0	0	0	0	0	0	0	0	0	0	0	0	0	7	0	0	0	0	0	0	1	0	0	0	0	0	0	5	0	0	0	3	0	0
>k141_1080646	306	0	0	0	0	0	0	0	0	0	0	0	0	0	0	0	0	0	0	0	0	0	0	4	0	0	0	0	0	0	0	0	0	0	0	0
>k141_1122276	321	0	0	0	0	0	0	0	0	0	0	0	0	0	0	0	2	0	2	0	0	0	0	1	0	0	0	2	0	0	0	0	0	0	0	0
>k141_1158906	771	0	0	0	0	0	0	0	0	0	0	0	0	0	0	0	0	0	0	0	0	0	0	0	0	0	0	0	0	4	0	0	0	22	0	17
>k141_1159683	414	0	0	0	0	0	0	0	0	0	0	0	0	0	0	0	0	0	0	0	0	0	0	0	0	0	0	0	0	2	2	0	8	0	0	0
>k141_1214819	957	0	0	0	0	0	0	0	0	0	0	0	0	0	0	0	0	0	0	0	0	0	0	0	0	0	0	0	0	14	0	0	2	10	0	24
>k141_1243095	291	0	0	0	0	0	0	0	0	0	0	0	0	0	0	0	0	0	0	0	0	0	2	0	4	0	0	0	0	2	0	0	0	0	0	0
>k141_1253407	606	0	0	0	0	0	0	0	0	0	0	0	0	0	0	0	0	0	0	0	0	0	0	0	0	0	0	0	0	14	0	0	1	0	0	0
>k141_1298560	321	0	0	0	0	0	0	0	0	0	0	0	0	0	0	0	0	0	0	0	0	0	0	0	0	0	0	0	0	5	1	0	4	0	0	0

## Sheet: Phage
Name	Contig Length	T06_1	T06_2	T06_3	T06_4	T06_5	T06_7	T06_9	T07_1	T07_2	T07_3	T07_4	T07_5	T07_6	T07_8	T07_9	T08_1	T08_2	T08_4	T08_5	T08_8	T08_9	T09_1	T09_3I	T09_4	T09_5I	T09_6	T09_7	T09_8	T10_1	T10_2	T10_3I	T10_4	T10_6	T10_7I	T10_9
Library		22033842	24534622	23412238	24033944	27980378	13425780	17912022	13338200	21803172	22600242	26571748	22896412	25750650	28306452	29337992	25120262	23764324	22226606	20170794	21620630	23023364	25330788	22391750	24765564	24056566	24555732	23421504	26022064	32443414	24402058	23140306	30110592	25919334	40840684	15009046
>k141_1000558	348	0	0	0	0	0	0	0	0	0	0	0	0	0	0	0	0	0	0	0	0	0	0	0	0	0	0	0	0	4	1	0	0	0	0	0
>k141_1013823	228	0	0	0	0	0	0	0	0	0	1	0	0	0	0	0	0	0	0	0	0	0	0	0	0	0	0	0	0	2	0	0	0	0	0	0
>k141_1021384	300	0	0	0	0	0	0	0	0	0	0	0	0	0	2	0	0	0	0	0	0	0	0	0	0	0	0	0	0	0	0	0	0	0	0	1
>k141_1049559	297	0	0	0	0	0	0	0	0	0	0	0	0	0	0	0	0	0	0	0	0	0	2	0	0	0	0	0	0	4	0	0	2	0	0	0
>k141_1062945	408	2	0	0	0	0	0	0	0	0	2	0	0	0	0	4	0	1	0	0	0	0	0	0	0	0	0	0	0	3	0	0	0	0	0	0
>k141_1066072	591	0	0	0	0	0	0	0	0	0	0	0	0	0	0	0	2	0	0	0	0	0	0	0	0	0	0	0	0	8	0	0	9	0	0	0
>k141_1088019	2256	0	9	2	0	0	0	0	0	2	22	6	2	8	8	0	0	0	0	0	0	0	0	0	2	2	4	1	16	21	13	10	30	2	19	10
>k141_110724	336	0	0	0	0	0	0	0	0	0	0	0	0	0	0	0	0	0	0	0	0	1	0	2	0	0	0	0	0	0	2	0	0	0	0	0
>k141_1127304	957	2	0	0	0	0	0	0	0	0	0	0	0	1	0	1	2	0	0	0	0	12	2	0	3	0	0	0	2	11	0	0	2	14	0	8
>k141_1155058	4389	0	0	0	0	0	0	0	0	0	0	0	0	0	0	0	29	8	4	0	4	2	65	56	85	4	0	31	0	34	15	4	19	2	14	0
>k141_1169990	462	0	0	0	0	0	0	0	0	0	2	0	0	0	0	1	0	0	0	0	0	4	0	0	0	0	0	0	0	2	0	0	9	2	0	2
>k141_174805	642	7	0	0	1	0	0	1	0	0	0	0	2	0	0	0	0	0	0	0	0	0	0	0	0	0	0	0	0	0	0	0	0	0	0	0
>k141_358920	306	0	0	0	0	0	0	0	0	0	0	0	0	4	2	12	0	0	0	0	0	6	0	0	0	0	0	0	0	0	0	0	0	0	0	0
>k141_367474	264	0	0	0	0	0	0	0	0	0	0	0	0	0	0	0	0	0	0	0	0	1	0	0	0	0	0	0	0	2	0	0	0	2	0	0
>k141_391354	411	0	0	0	0	0	0	0	0	0	0	0	0	0	0	0	2	0	0	0	0	0	0	0	0	0	0	0	0	4	1	0	3	0	0	0
>k141_396158	693	0	0	0	0	0	0	0	0	0	0	0	0	0	0	0	0	0	0	0	0	0	2	0	2	0	0	0	0	8	2	0	17	0	0	2
>k141_425761	309	0	0	0	0	0	0	0	0	0	0	0	0	2	0	2	0	1	0	0	0	0	0	0	0	0	0	0	0	1	0	0	2	1	0	0
>k141_446264	270	2	0	0	0	0	0	0	0	0	1	0	0	0	0	0	0	0	0	0	0	0	0	0	0	0	0	0	0	1	0	0	0	0	0	0
>k141_451534	393	0	0	0	0	0	0	0	0	0	0	0	0	0	0	0	2	0	0	0	0	0	0	0	0	0	0	0	0	12	0	0	0	0	0	0
>k141_480780	915	0	0	0	0	0	0	0	2	0	3	6	0	0	0	0	2	0	0	0	0	3	6	3	4	0	0	2	0	26	0	0	14	0	0	0
>k141_481907	306	0	0	0	0	0	0	0	0	0	0	0	0	0	0	1	0	0	0	0	0	2	2	2	0	0	0	0	0	7	0	0	0	1	0	0
>k141_507884	507	2	0	0	0	0	0	0	0	0	3	0	0	0	0	2	0	0	0	0	0	0	0	0	0	0	0	0	0	3	0	0	2	4	0	0
>k141_56722	237	0	0	0	0	0	0	0	1	0	0	2	0	0	0	0	0	0	0	0	0	0	4	0	0	0	0	0	0	0	0	0	0	0	0	0
>k141_598424	297	0	0	0	0	0	0	0	0	0	0	0	0	0	0	0	1	0	0	0	1	0	0	0	4	0	0	0	0	0	2	0	0	0	0	0
>k141_621162	294	0	0	0	0	0	0	0	0	0	0	0	0	0	0	0	0	0	0	0	0	0	0	0	0	0	0	0	0	0	0	0	0	0	0	2
>k141_633558	297	0	0	0	0	0	0	0	0	0	0	0	0	0	0	2	0	0	0	0	0	0	2	0	0	0	0	0	0	0	0	0	0	0	0	0
>k141_701497	438	0	0	0	0	0	2	0	0	0	0	0	0	1	2	1	0	0	0	0	0	0	0	0	0	0	0	0	0	4	0	0	2	4	0	0
>k141_706510	315	0	0	0	0	0	0	0	2	0	4	0	0	8	2	34	0	0	0	0	0	9	0	0	0	0	2	0	1	0	0	0	0	4	0	1
>k141_735142	474	1	0	0	0	0	0	0	0	0	0	0	0	0	2	2	0	0	0	0	0	2	0	2	0	0	0	0	0	0	0	0	1	0	0	2
>k141_759308	384	0	0	0	0	0	0	0	0	0	1	0	0	0	0	4	0	0	0	0	0	0	0	0	0	0	0	0	0	2	0	0	0	2	0	0
>k141_783598	324	0	0	0	0	0	0	0	0	0	0	0	0	0	0	3	0	0	0	0	0	0	0	0	0	0	0	0	0	0	0	0	2	4	0	0
>k141_817178	309	0	0	0	0	0	0	0	0	0	0	0	0	0	0	0	0	0	0	0	0	0	0	2	0	0	0	0	0	2	0	0	0	3	0	4
>k141_826591	393	0	0	0	0	0	0	0	0	0	0	0	0	4	7	31	0	0	0	0	0	1	0	0	3	0	0	0	3	0	0	0	0	1	0	2
>k141_881164	312	0	0	0	0	0	0	0	0	0	0	0	0	0	0	0	0	0	0	0	0	0	0	0	0	0	0	0	0	1	0	0	1	0	0	0
>k141_887352	492	0	0	0	0	0	0	0	0	0	0	0	0	0	0	0	0	0	2	0	0	0	0	0	0	0	0	0	0	10	2	0	7	0	0	0
>k141_888051	417	0	0	0	0	0	0	0	2	0	0	0	0	0	0	3	0	0	0	0	0	0	0	0	0	0	0	0	0	0	0	0	2	1	0	1
>k141_924542	336	0	0	0	0	0	0	0	0	0	0	0	0	0	1	3	0	1	0	0	0	0	4	0	2	0	0	0	0	3	0	0	0	0	0	0
>k141_959931	435	2	0	2	6	0	0	0	4	0	18	0	0	0	0	0	0	0	0	0	0	0	0	0	0	0	0	0	0	0	0	0	0	0	0	0
>k141_965229	462	0	0	0	0	0	0	0	0	0	0	0	0	1	0	0	0	0	0	0	0	1	0	0	0	0	0	0	0	3	0	0	0	3	0	2
>k141_97159	321	0	0	0	0	0	0	0	0	0	0	0	0	0	0	1	0	0	0	0	0	3	0	0	0	0	0	0	0	1	0	0	0	2	0	0
>k141_978109	348	0	0	0	0	0	0	0	0	0	0	0	0	0	0	0	0	3	0	0	0	0	5	0	1	0	0	0	0	2	0	0	0	0	0	0
>k141_1061657	393	0	4	6	1	0	0	23	0	2	0	1	5	1	0	0	4	2	5	1	0	0	7	0	4	1	0	0	2	0	0	0	0	0	11	1
>k141_1075943	969	10	43	23	41	65	11	55	14	23	25	7	62	32	214	0	41	8	61	18	4	0	70	4	55	19	44	17	26	6	43	14	14	1	140	31
>k141_1167083	441	0	8	3	7	13	0	20	0	0	6	1	15	12	50	0	0	0	0	0	0	0	0	0	1	0	10	0	0	0	4	0	2	0	13	3
>k141_191077	168	0	0	0	0	0	0	0	0	0	0	0	0	0	0	0	0	0	0	0	0	0	0	0	0	0	0	0	1	0	0	0	0	0	0	0
>k141_333607	228	2	26	11	8	6	0	25	0	4	2	0	17	12	12	0	0	0	0	0	0	0	0	0	0	1	1	0	0	0	3	3	0	0	31	12
>k141_339906	342	1	1	0	0	2	0	2	0	1	0	1	4	0	48	0	16	2	13	0	2	0	43	6	23	5	28	4	13	0	0	2	4	0	4	5
>k141_424121	213	3	7	8	1	6	0	4	0	4	5	8	10	9	4	0	0	0	0	0	0	0	0	0	2	1	0	0	0	0	6	0	2	0	43	11
>k141_523022	735	78	76	59	113	66	14	104	21	39	58	19	173	81	137	0	30	2	33	8	2	0	42	5	38	9	35	4	12	3	50	11	13	2	214	60
>k141_528002	225	2	7	3	2	8	0	13	1	6	6	1	25	1	7	0	1	0	0	2	0	0	2	0	0	0	0	1	1	0	5	3	0	0	21	6
>k141_573392	2295	226	689	490	966	885	151	794	140	178	318	157	953	478	467	2	73	16	79	20	4	0	114	30	112	52	70	20	51	12	307	137	57	0	1339	238
>k141_650260	312	1	7	13	39	2	5	19	0	8	1	0	19	7	3	0	0	0	1	1	0	0	0	1	0	0	0	0	0	0	5	0	0	0	10	5
>k141_650460	495	22	15	17	21	32	8	42	5	9	2	9	32	8	66	0	3	0	0	1	0	0	0	2	1	2	25	1	0	0	11	4	0	0	48	16
>k141_846244	420	19	42	35	68	73	11	81	1	9	21	7	50	48	17	0	0	1	0	1	0	0	0	1	3	0	2	4	2	4	20	4	1	0	77	3
>k141_865580	678	149	392	231	493	564	82	437	65	94	172	68	519	233	163	0	15	0	3	1	0	0	12	2	9	24	10	3	5	12	130	81	21	0	610	137

## Sheet: Host
Name	Contig Length	T06_1	T06_2	T06_3	T06_4	T06_5	T06_7	T06_9	T07_1	T07_2	T07_3	T07_4	T07_5	T07_6	T07_8	T07_9	T08_1	T08_2	T08_4	T08_5	T08_8	T08_9	T09_1	T09_3I	T09_4	T09_5I	T09_6	T09_7	T09_8	T10_1	T10_2	T10_3I	T10_4	T10_6	T10_7I	T10_9
Library		22033842	24534622	23412238	24033944	27980378	13425780	17912022	13338200	21803172	22600242	26571748	22896412	25750650	28306452	29337992	25120262	23764324	22226606	20170794	21620630	23023364	25330788	22391750	24765564	24056566	24555732	23421504	26022064	32443414	24402058	23140306	30110592	25919334	40840684	15009046
>k141_891	207	0	5	2	0	0	0	0	0	0	0	0	0	0	1	0	0	2	0	0	0	0	1	0	0	0	0	0	1	0	0	0	2	0	0	1
>k141_1375	327	0	0	0	0	0	0	0	2	0	0	0	0	0	0	0	0	0	0	0	0	2	0	0	0	0	0	0	0	0	0	0	0	0	0	2
>k141_1906	582	2	0	0	0	0	0	0	0	0	4	2	0	0	0	0	4	0	8	0	2	0	0	2	0	0	0	0	0	6	0	0	4	0	0	0
>k141_2182	510	0	0	0	0	0	0	2	0	0	2	0	0	0	0	0	0	0	0	0	0	2	2	0	5	0	0	2	0	0	0	0	0	2	0	0
>k141_5771	465	0	0	0	0	0	0	2	0	0	0	0	1	2	5	4	0	2	1	0	0	7	2	0	7	0	1	2	0	2	0	2	1	9	2	2
>k141_6770	494	5	0	0	0	0	2	0	2	0	0	0	0	0	0	2	0	0	0	0	0	8	0	0	0	0	0	0	0	0	0	0	1	2	0	0
>k141_6835	312	0	0	0	0	0	0	0	0	0	0	0	1	3	2	2	0	0	0	0	0	7	0	0	0	0	0	0	0	0	0	0	0	0	0	0
>k141_8604	351	0	0	0	0	0	0	0	0	0	0	0	0	0	0	1	0	0	0	0	0	2	2	0	0	0	0	1	0	0	0	0	1	4	0	0
>k141_9092	498	0	0	0	0	0	0	0	0	0	0	4	0	0	0	0	2	0	0	0	0	0	0	0	0	0	0	0	0	0	0	2	0	0	2	0
>k141_11430	444	0	0	0	0	0	0	0	0	0	0	0	0	0	0	0	0	0	0	0	0	0	2	0	3	0	0	0	2	2	0	0	0	0	0	0
>k141_16678	345	0	0	0	0	0	0	0	0	0	0	0	0	0	0	0	2	0	0	0	0	0	12	0	2	0	0	0	0	0	0	0	0	0	0	0
>k141_17912	342	0	0	0	0	0	0	0	0	0	0	0	0	0	0	0	0	0	0	0	0	0	0	0	0	0	0	0	0	0	0	0	0	12	0	0
>k141_18828	3945	0	152	20	18	32	2	8	35	32	127	247	9	58	706	0	12	34	24	10	82	0	44	60	82	51	120	109	286	79	68	28	131	90	61	18
>k141_22017	402	0	0	0	0	0	0	0	0	0	0	0	0	0	0	0	0	0	0	0	0	2	3	0	5	0	0	0	0	0	0	0	0	0	0	0
>k141_24918	528	6	0	0	0	0	0	0	0	0	0	0	0	0	2	4	0	0	0	0	0	6	0	0	1	0	0	0	0	0	0	0	0	3	0	0
>k141_25079	402	4	0	0	0	0	0	0	0	0	0	0	0	0	0	0	0	0	0	0	0	0	0	0	0	0	0	0	0	4	0	0	0	9	0	0
>k141_26146	531	0	0	0	0	0	0	0	0	0	0	0	0	2	0	1	0	0	0	0	0	11	2	0	0	0	0	0	0	0	0	0	0	0	0	0
>k141_26841	207	0	0	0	0	0	0	0	0	0	0	0	0	0	0	9	0	0	0	0	0	0	0	2	1	0	0	0	0	0	0	0	1	0	0	0
>k141_27507	1221	0	0	0	0	0	0	0	0	0	0	10	0	0	0	0	0	0	6	0	0	0	0	4	4	0	0	0	0	0	6	0	0	0	2	0
>k141_32316	1095	7	5	5	15	11	6	9	0	7	11	17	0	0	8	0	10	7	8	10	10	4	21	8	11	28	10	4	1	4	13	5	14	7	16	2
>k141_33845	270	9	0	0	0	0	0	6	1	0	0	0	0	5	0	6	0	0	0	0	0	7	1	2	1	0	0	0	0	8	0	0	1	1	0	0
>k141_36957	471	0	0	0	0	0	0	0	0	0	0	0	0	2	0	12	0	1	0	0	0	5	2	0	2	0	0	0	2	2	2	0	2	2	0	1
>k141_37732	318	0	0	0	0	0	0	0	0	0	0	1	0	0	0	1	0	0	0	0	0	2	0	0	0	1	0	0	0	0	0	0	0	5	0	0
>k141_37963	549	0	0	0	0	0	0	0	0	0	0	0	0	0	0	14	0	0	0	0	0	0	4	2	0	0	0	0	0	0	0	0	0	0	0	0
>k141_38897	3357	2	0	0	1	0	0	1	0	0	0	1	0	2	0	0	4	4	6	0	0	5	12	13	48	0	0	0	0	166	23	0	93	13	0	9
>k141_39418	336	0	0	0	0	0	0	0	0	0	0	0	0	0	0	0	0	0	0	0	0	1	2	1	0	0	0	0	0	0	0	0	0	0	0	2
>k141_40564	303	0	0	0	0	0	0	0	0	0	0	0	0	3	2	2	0	0	0	0	0	2	0	0	1	0	0	0	0	0	0	0	0	1	0	0
>k141_43314	423	0	0	0	0	0	0	0	0	0	0	0	0	0	1	0	0	2	0	0	0	0	4	0	0	0	0	0	0	0	0	0	0	5	0	0
>k141_43552	2526	4	8	0	8	13	4	4	0	10	4	4	4	1	2	0	0	8	5	2	0	2	0	2	2	7	6	11	7	4	14	18	10	8	34	2
>k141_44000	735	0	0	0	0	0	0	0	0	0	0	0	0	0	0	0	0	0	0	0	0	0	10	2	4	0	0	0	4	2	1	0	0	0	0	0
>k141_44232	714	0	0	0	0	0	0	0	0	0	0	0	0	0	0	6	5	2	0	0	2	2	7	0	0	0	0	0	0	3	0	0	0	0	0	0
>k141_44825	231	2	0	2	3	7	0	0	0	2	0	0	0	0	0	0	0	2	0	1	0	0	0	0	0	0	0	0	0	0	0	0	0	2	0	0
>k141_46543	1059	0	3	0	2	8	0	0	0	2	0	2	2	0	3	0	0	0	2	0	0	0	0	0	2	0	0	0	0	0	0	0	0	0	0	2
>k141_46555	366	3	0	0	0	0	0	0	1	0	0	1	0	0	0	6	0	0	0	0	0	2	0	0	0	0	0	0	0	0	0	0	0	0	0	0
>k141_46939	429	1	1	0	4	3	2	0	0	6	0	2	0	0	1	0	1	2	1	0	0	0	0	0	0	1	0	0	0	0	2	0	0	0	0	0
>k141_47099	372	0	0	0	0	0	0	0	0	0	0	0	0	0	0	0	0	0	0	0	0	0	14	0	0	0	0	0	0	0	0	0	0	0	0	0
>k141_47520	1197	18	0	0	2	0	0	3	2	0	3	0	4	11	2	13	2	1	2	0	0	15	8	0	5	0	0	0	0	4	0	0	2	2	0	0
>k141_47557	765	0	0	4	3	0	4	0	0	4	0	2	0	0	0	0	0	0	0	0	0	0	0	0	0	0	0	0	0	0	0	0	0	0	0	0
>k141_47578	1320	14	0	0	0	0	0	5	1	0	0	2	2	1	1	14	0	4	3	2	0	16	7	9	18	0	0	0	0	83	4	0	34	9	0	3
>k141_47906	300	0	0	0	0	0	0	0	0	0	0	0	0	0	0	4	0	0	0	0	0	1	0	0	0	0	0	0	0	0	0	0	0	0	0	0
>k141_50137	921	0	0	0	0	0	0	0	0	0	2	0	0	0	0	0	0	0	2	0	0	0	4	6	6	0	0	0	0	0	0	0	0	0	0	0
>k141_50405	1917	11	0	0	2	0	0	0	3	0	3	4	2	6	12	32	3	2	1	0	0	22	4	0	7	0	2	0	13	10	8	0	6	26	0	11
>k141_52906	651	1	0	0	0	0	0	0	0	0	1	0	0	0	0	0	0	0	0	0	0	0	0	0	2	2	0	2	0	3	3	0	0	0	0	0
>k141_54558	552	0	0	0	0	0	1	0	0	0	0	2	0	2	3	0	0	0	0	0	0	6	2	0	0	0	0	0	4	0	0	0	0	4	0	0
>k141_57121	300	0	0	0	0	0	0	0	0	0	0	0	0	0	0	5	0	0	0	0	0	0	1	0	0	0	0	0	0	0	0	0	2	0	0	0
>k141_57245	330	0	0	0	0	0	0	0	1	0	0	0	0	0	0	4	0	0	0	0	0	2	0	0	0	0	0	0	0	0	0	0	3	0	1	0
>k141_57271	300	0	0	0	0	0	0	0	0	0	0	0	0	0	0	2	0	0	0	0	2	1	0	0	0	0	0	0	0	0	0	0	1	1	0	1
>k141_58070	393	0	0	0	0	0	0	0	0	0	0	0	0	0	0	0	0	2	0	0	0	0	0	0	0	2	4	0	0	0	0	0	2	5	0	0
>k141_58100	623	0	0	0	0	0	0	0	0	0	0	0	0	0	0	5	0	0	0	0	0	8	0	0	0	0	0	0	0	0	0	0	0	2	0	0
>k141_58630	402	0	0	0	0	0	0	0	0	0	0	0	0	0	2	2	0	2	0	0	2	2	0	0	0	0	0	0	0	0	0	0	1	1	0	0
>k141_59710	585	2	0	0	4	0	2	2	2	0	0	0	0	0	0	3	0	4	2	0	0	2	12	6	3	0	0	0	0	6	0	2	7	0	0	0
>k141_65251	843	4	2	2	4	8	0	0	2	0	4	0	4	4	28	6	1	1	0	2	1	8	1	2	4	0	0	0	2	0	2	0	0	1	1	0
>k141_66248	534	0	4	0	1	4	2	2	0	0	2	0	2	0	0	0	0	0	0	2	0	0	0	0	2	0	0	0	0	0	0	0	2	1	0	0
>k141_66441	354	1	0	0	0	0	0	0	0	0	0	0	0	0	1	2	0	0	2	0	0	1	0	0	0	0	0	0	0	1	2	0	0	0	0	0
>k141_67040	315	0	0	0	0	0	0	0	0	0	0	0	0	0	0	6	0	0	0	0	0	0	0	0	0	0	0	0	0	0	0	0	0	0	0	0
>k141_67309	393	0	2	0	0	0	0	0	0	2	2	0	0	0	4	0	0	0	0	0	0	2	0	0	0	0	0	0	0	0	0	0	0	0	0	0
>k141_67427	513	2	0	0	0	0	0	0	0	0	0	0	0	0	0	2	0	0	0	0	0	0	4	2	0	0	0	0	0	3	0	0	0	5	0	0
>k141_68047	687	7	0	0	0	0	0	2	0	0	0	0	0	0	2	0	0	0	0	0	0	0	0	0	0	0	0	0	0	4	0	0	0	0	0	0
>k141_71903	858	0	0	0	0	0	0	0	0	0	0	0	0	2	0	0	0	0	0	0	0	0	0	0	4	2	4	0	10	2	2	0	4	2	2	0
>k141_72005	624	2	2	0	0	0	0	0	0	0	4	5	0	0	6	0	2	2	2	0	0	0	0	2	0	0	0	0	0	0	1	0	2	0	2	0
>k141_72422	995	4	0	0	0	0	0	0	4	0	4	12	0	0	0	3	0	2	4	0	2	2	3	0	0	0	0	0	0	3	1	0	2	12	0	4
>k141_74167	3513	12	10	2	0	7	0	1	2	0	2	2	1	11	108	30	0	0	0	0	4	23	3	2	0	1	6	2	6	4	2	2	2	45	0	4
>k141_75518	672	0	2	0	0	0	0	0	0	0	2	0	0	0	0	0	0	3	0	1	0	1	0	0	0	0	0	0	0	1	14	0	0	1	4	0
>k141_75583	1392	10	0	0	1	0	0	4	0	0	0	0	2	3	3	5	0	0	0	0	0	4	6	0	3	0	0	0	0	0	0	0	0	36	0	1
>k141_77545	507	0	0	0	0	0	0	0	0	0	0	0	0	0	0	2	0	0	0	0	0	8	1	0	0	0	0	0	0	0	0	0	0	0	0	0
>k141_78296	2223	268	9	3	28	0	0	26	0	0	0	0	0	0	0	0	0	0	0	0	0	0	0	0	0	0	0	0	0	0	0	0	0	0	0	0
>k141_78711	942	5	0	2	2	0	2	2	2	0	0	0	0	2	0	7	0	2	2	0	0	8	10	0	2	0	2	0	0	10	2	0	1	21	0	4
>k141_79660	720	0	0	0	4	6	0	0	0	0	2	0	0	0	0	0	0	0	0	2	0	0	0	0	0	0	0	2	0	1	0	0	0	0	0	0
>k141_80838	1155	0	2	11	2	14	2	5	0	4	0	2	2	0	4	1	0	0	0	2	1	0	0	0	0	2	0	0	0	0	1	0	0	6	2	0
>k141_82021	579	0	3	0	0	2	0	0	0	3	0	2	0	1	0	0	0	2	2	1	0	2	0	0	0	0	0	0	0	2	4	0	1	0	2	0
>k141_82632	1242	0	0	0	0	0	0	0	0	0	0	0	0	2	0	7	2	8	4	0	2	4	6	2	14	0	2	0	4	6	2	0	3	0	0	0
>k141_83390	636	0	0	0	0	0	0	0	0	0	0	0	0	2	0	1	0	0	0	0	0	2	1	0	0	0	0	0	0	2	4	0	0	9	0	0
>k141_84363	1473	0	0	0	0	0	0	0	0	0	0	0	0	0	0	1	1	0	0	1	0	105	0	1	0	0	2	0	0	0	0	0	0	3	0	0
>k141_87016	582	0	0	0	0	0	0	0	0	0	0	0	0	0	0	2	0	0	0	0	0	2	0	0	0	0	0	0	0	0	0	0	0	25	0	0
>k141_91774	384	2	0	0	0	0	0	0	0	0	0	0	0	1	3	3	0	0	0	0	0	0	0	0	0	0	0	0	0	0	0	2	0	2	0	0
>k141_91986	2136	4	10	10	8	29	2	2	2	33	4	2	6	3	14	0	0	2	0	4	0	1	0	0	0	14	0	0	0	2	2	0	0	0	20	2
>k141_92838	267	2	0	0	0	2	0	0	0	0	0	0	0	0	0	0	3	0	0	0	0	0	0	0	0	0	0	0	0	0	0	0	0	0	0	0
>k141_93096	579	0	0	2	2	1	0	1	2	2	0	2	0	0	2	1	2	0	0	0	0	0	2	3	0	2	1	0	1	3	2	0	0	0	0	0
>k141_93156	1404	0	0	0	0	0	0	0	0	0	0	0	0	2	0	0	6	3	16	5	2	1	8	8	3	0	0	0	2	0	0	0	0	0	0	0
>k141_93217	939	4	1	0	0	0	0	0	0	0	0	2	0	4	2	0	0	0	0	0	0	2	0	0	0	0	4	0	0	0	0	0	0	20	0	4
>k141_100398	462	0	0	0	0	0	0	0	0	0	2	4	0	2	2	0	0	0	0	0	0	0	0	2	0	0	0	2	1	0	0	0	0	0	0	0
>k141_102119	573	0	0	0	0	0	0	0	0	0	0	0	0	0	0	2	0	0	0	0	0	2	0	0	0	0	0	0	0	2	0	0	0	12	0	0
>k141_103896	660	4	0	0	2	0	0	5	0	0	2	0	0	3	5	2	0	0	1	0	2	6	0	0	2	0	0	2	0	2	0	0	0	6	0	4
>k141_104097	462	0	0	0	0	0	0	0	0	0	0	0	0	0	0	6	0	0	0	0	0	8	0	0	0	0	0	0	0	0	0	0	0	0	0	0
>k141_104445	417	0	0	0	0	0	0	0	0	0	2	1	4	2	2	0	0	0	0	0	0	1	0	0	6	0	0	0	1	0	3	0	0	0	0	0
>k141_105595	321	0	0	0	0	0	0	0	0	0	0	0	0	0	0	0	0	2	0	0	0	5	0	0	0	0	0	0	0	0	0	0	0	0	0	0
>k141_108489	918	0	0	0	0	0	2	0	0	0	0	2	0	1	0	17	0	0	0	0	0	19	4	0	0	0	0	0	0	0	0	0	0	10	0	0
>k141_109834	342	0	0	0	0	0	0	0	0	0	0	0	0	0	0	3	0	0	0	0	1	10	1	0	0	0	0	0	0	0	0	0	0	2	0	0
>k141_109897	345	0	0	0	0	0	0	0	0	0	0	0	0	4	2	2	0	0	0	0	0	0	0	0	0	0	0	0	0	0	0	0	0	4	0	0
>k141_110590	384	0	0	0	0	0	0	0	0	0	0	0	0	0	0	2	0	0	0	0	0	5	0	0	0	0	0	0	0	0	0	0	0	2	0	0
>k141_111321	351	0	0	0	0	0	0	0	0	0	0	0	0	0	0	0	0	0	4	0	0	0	2	0	0	0	0	0	0	0	0	0	0	0	0	0
>k141_111571	309	0	0	0	0	0	0	0	0	0	0	0	0	0	0	0	0	0	0	0	0	1	0	0	0	0	0	0	0	1	0	0	0	6	0	0
>k141_112125	702	0	0	2	2	0	2	0	0	0	0	4	0	3	0	3	0	0	2	0	4	4	4	5	4	0	0	0	2	0	0	0	0	0	1	1
>k141_112606	396	0	0	0	0	0	0	0	0	0	0	0	0	0	0	0	0	0	0	0	0	3	4	0	0	0	0	0	0	0	0	0	0	0	0	1
>k141_114038	417	0	0	0	0	0	0	0	0	0	4	1	0	0	0	0	0	0	4	0	0	0	11	0	2	0	0	0	2	1	2	0	0	0	0	0
>k141_114718	750	1	0	0	2	2	0	0	0	3	4	1	0	2	4	3	1	2	0	2	0	1	3	0	2	0	2	0	1	1	1	0	1	0	0	0
>k141_115354	324	0	0	0	2	0	0	0	2	0	4	3	0	0	0	0	0	0	0	0	0	0	0	0	0	0	0	0	0	0	0	0	0	0	0	2
>k141_119366	504	0	0	0	0	0	0	0	0	0	2	5	0	2	0	4	2	0	0	0	0	0	4	0	0	0	0	0	0	0	0	0	0	11	0	3
>k141_119739	552	0	0	0	1	0	0	0	2	0	2	4	0	1	0	2	0	0	0	0	0	0	0	0	0	0	0	0	0	7	3	0	4	1	0	0
>k141_119749	303	1	0	0	0	0	0	0	0	0	0	0	0	0	0	3	0	0	0	0	0	0	0	0	0	1	0	0	0	0	0	0	0	4	0	0
>k141_120387	552	0	0	0	0	0	0	0	0	0	0	0	0	0	0	0	0	0	0	2	0	0	2	2	2	1	0	0	0	0	0	1	1	0	2	0
>k141_121077	591	3	2	0	2	0	0	0	0	0	1	3	0	1	1	1	0	1	0	6	2	4	14	0	3	6	5	3	5	0	0	0	6	2	0	0
>k141_124378	423	1	2	0	0	0	0	0	0	0	0	0	0	0	0	1	0	0	0	2	0	0	0	0	0	0	0	0	0	0	0	0	0	14	0	0
>k141_126594	360	0	0	2	0	0	0	0	0	0	3	0	0	0	0	0	0	0	0	0	0	0	0	0	0	0	0	0	0	0	0	0	0	0	0	0
>k141_128583	414	3	0	0	0	0	0	0	1	0	2	0	2	0	0	3	1	1	0	0	0	2	1	0	3	0	0	0	0	2	3	0	0	1	0	0
>k141_133981	915	0	0	0	0	0	0	0	0	4	0	0	0	0	0	0	0	16	0	2	0	0	0	0	0	0	0	0	0	0	2	0	0	0	0	0
>k141_134384	2850	2	26	10	4	2	0	6	8	0	2	15	0	12	86	16	0	3	2	4	4	25	10	0	8	0	18	2	2	0	8	6	0	118	10	45
>k141_135627	348	0	0	0	0	0	0	0	0	0	1	0	0	0	0	0	0	0	2	0	0	0	0	0	3	0	0	0	0	6	0	0	0	0	0	0
>k141_141982	327	0	0	0	0	0	0	0	0	0	0	0	0	0	0	0	0	0	0	0	0	2	0	0	0	0	0	0	0	0	0	0	0	0	0	2
>k141_142082	786	8	2	2	0	0	0	0	0	0	1	0	0	0	0	6	0	0	0	0	0	0	2	0	2	0	0	0	0	8	0	0	0	8	0	0
>k141_142231	726	0	0	0	0	0	0	0	0	0	0	0	0	0	0	0	6	2	2	0	2	0	2	0	0	0	0	4	0	0	0	0	2	0	2	0
>k141_142355	1119	8	6	4	9	20	4	2	4	16	16	11	8	6	0	1	0	6	0	0	0	0	2	7	3	4	0	0	0	0	7	4	0	5	15	2
>k141_142939	1383	10	16	8	46	43	11	29	3	0	11	16	0	3	6	0	4	4	2	2	2	0	7	12	20	1	4	7	13	19	2	1	12	2	7	2
>k141_146632	1353	20	2	2	8	1	2	2	4	4	9	26	0	2	9	18	2	0	4	0	3	9	19	2	5	0	0	0	0	10	6	2	5	7	4	5
>k141_146768	1857	2	0	10	2	4	2	2	2	0	16	6	0	0	0	0	0	0	4	0	0	0	0	14	4	2	0	0	0	0	0	2	8	0	2	0
>k141_149211	261	0	0	0	0	0	0	0	0	0	0	0	0	0	0	0	0	0	0	0	0	0	0	0	0	0	1	0	0	0	0	0	0	2	0	0
>k141_151935	483	2	0	0	0	0	0	0	0	0	0	0	0	2	0	0	2	0	2	0	0	0	2	0	0	0	0	0	0	0	0	0	0	0	0	0
>k141_152661	323	0	0	0	0	0	0	0	2	0	0	0	0	0	0	0	2	0	0	0	0	1	0	0	1	0	0	0	0	3	1	0	1	0	0	1
>k141_152825	447	0	0	0	0	0	0	0	0	0	0	0	0	0	0	2	0	0	0	0	0	0	0	0	0	0	0	0	0	4	0	0	2	0	0	0
>k141_156521	228	0	0	0	0	0	0	0	0	0	0	0	0	4	0	0	0	0	0	0	0	0	0	0	0	0	0	0	0	1	0	0	0	3	0	0
>k141_160172	240	2	27	7	2	0	2	1	9	23	8	15	6	21	71	0	97	63	33	54	44	1	6	16	23	51	23	24	67	44	79	13	60	47	42	7
>k141_162257	558	0	0	1	0	0	0	0	0	0	1	1	0	1	0	4	0	0	0	0	0	0	1	0	2	0	0	0	0	2	0	0	2	0	0	1
>k141_162950	555	2	0	0	2	0	0	1	0	0	1	0	0	1	2	10	0	0	0	0	0	1	0	0	0	0	0	0	0	0	0	0	0	0	0	2
>k141_163795	561	0	0	0	0	0	0	0	0	0	2	0	0	0	0	0	1	0	0	0	0	2	0	0	0	0	0	0	0	0	0	1	3	0	2	0
>k141_167070	249	0	0	0	0	0	0	0	0	0	2	0	0	0	0	0	0	0	0	1	0	0	0	2	0	0	0	0	0	0	1	0	0	0	0	0
>k141_167186	744	5	2	0	0	0	0	0	0	0	2	2	0	0	0	6	0	0	0	0	0	0	2	0	0	3	0	0	1	0	0	0	0	5	0	0
>k141_168272	435	0	0	0	0	0	0	0	0	0	0	0	0	0	1	2	0	0	0	0	0	0	0	0	0	0	0	0	0	0	0	0	2	4	0	0
>k141_168321	582	0	3	0	0	4	0	0	2	1	9	23	0	5	9	0	50	22	16	33	34	0	3	13	15	33	23	10	40	86	94	13	72	103	16	3
>k141_168531	564	0	0	0	0	0	0	0	0	0	0	2	0	0	0	0	2	2	0	0	0	0	0	0	0	3	3	0	0	0	4	2	2	0	0	0
>k141_168643	432	0	0	0	0	2	0	0	2	0	0	4	4	2	0	1	0	1	1	0	1	4	8	0	9	0	0	1	2	4	2	2	0	0	0	1
>k141_171089	876	3	98	6	8	14	3	5	21	39	58	54	30	50	276	0	395	352	190	355	223	2	33	85	136	305	274	252	269	172	342	110	360	322	197	36
>k141_171908	384	2	0	0	0	0	0	2	0	0	0	2	0	0	0	0	0	0	0	0	0	15	0	0	0	0	0	0	0	0	0	0	4	0	0	2
>k141_172832	417	1	0	0	0	0	0	0	0	0	0	0	0	0	0	0	0	0	0	4	0	0	0	0	0	1	0	0	0	0	0	0	0	0	0	0
>k141_177539	417	0	0	0	0	1	0	0	0	0	0	0	2	0	0	1	0	0	0	0	0	9	0	0	0	0	0	0	0	0	0	0	0	1	0	0
>k141_182158	384	13	0	0	0	0	0	0	0	0	0	0	0	0	0	0	0	0	0	0	5	1	1	0	2	0	0	0	0	0	1	0	0	2	0	1
>k141_182608	588	4	0	0	0	1	0	0	0	0	0	0	0	0	0	10	0	0	0	0	0	0	0	0	0	0	0	0	0	0	0	0	0	1	0	0
>k141_182679	513	0	0	0	0	0	0	0	0	0	0	2	0	0	0	0	0	0	4	0	0	0	2	1	0	0	0	2	0	0	0	0	0	0	0	0
>k141_182747	705	0	0	0	0	0	0	0	0	0	0	0	0	2	0	6	0	0	0	0	0	2	0	0	0	0	0	0	0	9	0	0	2	2	0	2
>k141_183298	363	2	0	0	0	0	0	0	0	0	0	0	0	2	0	2	0	0	0	0	0	3	0	0	0	0	0	0	0	0	0	0	0	0	0	0
>k141_184938	849	0	4	0	0	0	0	0	0	4	4	6	0	0	0	0	0	0	0	0	2	0	0	0	0	0	0	2	2	0	0	0	0	0	2	0
>k141_185910	390	1	0	0	0	0	0	0	0	0	0	0	0	0	0	0	0	0	0	0	0	0	0	0	0	0	0	0	0	2	6	0	0	0	0	0
>k141_186996	1785	2	0	0	14	0	0	0	0	0	22	2	0	0	0	0	18	0	22	0	8	2	2	4	2	0	0	2	10	37	0	0	23	0	0	0
>k141_187876	681	0	0	0	0	0	2	0	2	0	2	2	0	0	2	0	0	0	0	0	0	0	0	2	3	0	2	0	2	0	0	0	0	0	0	0
>k141_188600	366	0	0	0	0	0	0	0	0	0	0	0	0	0	0	2	0	0	0	0	0	7	0	0	0	0	0	0	0	0	0	0	0	0	0	0
>k141_188731	4152	4	7	27	39	85	24	15	4	113	25	54	14	7	8	6	0	5	4	14	0	6	6	8	6	9	0	9	1	2	21	7	2	2	141	0
>k141_189148	1284	2	0	0	0	2	0	0	0	0	0	2	0	2	0	22	0	0	0	0	0	14	0	0	2	0	0	0	0	0	0	0	0	7	0	4
>k141_189950	441	2	0	0	0	0	0	1	0	0	0	0	0	0	2	4	0	0	0	0	0	6	0	0	0	0	0	0	0	0	0	0	1	4	0	2
>k141_190278	321	0	0	0	0	0	0	0	0	0	0	0	0	0	3	0	0	0	0	0	0	0	0	0	0	3	0	2	1	0	2	0	0	0	0	0
>k141_190836	1359	2	0	0	2	3	0	2	0	0	10	8	2	0	0	0	0	0	0	0	0	0	6	7	6	0	0	0	0	0	2	2	0	0	2	0
>k141_191172	624	0	38	2	1	5	0	5	6	10	19	19	18	18	81	2	275	129	111	128	122	0	26	60	115	97	103	67	84	91	112	20	150	99	39	4
>k141_192640	504	0	0	0	0	0	0	4	0	0	0	0	0	0	0	1	0	0	0	0	0	2	0	0	0	0	0	0	0	0	0	0	0	4	0	2
>k141_193495	461	0	0	0	0	0	0	0	0	0	1	4	0	0	0	0	0	0	0	2	0	2	11	0	2	0	2	0	2	0	1	1	0	0	0	0
>k141_196138	975	0	1	0	0	1	0	0	0	0	0	2	0	6	14	7	0	0	0	0	0	5	0	0	4	0	0	0	0	0	1	2	3	6	0	5
>k141_196264	402	1	0	0	0	0	0	0	0	0	0	0	0	0	2	0	0	0	3	1	3	2	3	0	0	0	0	1	0	4	0	0	2	2	0	0
>k141_196599	585	1	0	0	0	0	0	0	0	0	0	0	0	0	0	0	3	0	2	0	0	1	0	4	3	0	0	0	0	0	0	0	0	0	0	0
>k141_198716	189	0	0	0	0	0	0	0	0	0	1	0	0	0	1	0	0	0	0	0	0	0	0	0	0	2	2	0	0	0	0	0	0	0	1	1
>k141_200447	513	2	0	0	0	1	0	0	0	0	3	0	0	0	2	4	0	10	3	2	1	0	3	0	5	2	0	2	2	2	29	4	2	1	1	4
>k141_201099	378	4	0	0	0	0	0	0	0	2	4	0	0	2	0	0	0	0	0	1	0	3	2	0	0	1	1	0	0	1	0	1	1	0	4	0
>k141_203645	798	68	0	2	3	1	0	14	2	0	2	2	3	19	0	33	0	0	1	0	0	42	14	6	18	0	0	0	0	99	7	0	13	58	2	12
>k141_204874	863	2	3	0	0	0	0	0	0	0	0	0	0	0	0	2	0	2	3	0	0	0	2	1	2	0	0	0	0	0	0	0	0	18	0	0
>k141_208676	1527	4	0	1	5	0	0	3	0	0	6	4	3	8	7	2	2	2	0	2	6	3	6	12	3	2	0	0	8	0	7	2	0	0	2	0
>k141_212202	471	0	0	0	0	0	0	0	0	0	0	0	0	0	2	7	1	0	0	0	0	0	0	0	1	0	0	0	0	0	0	0	0	8	0	0
>k141_212534	381	0	0	0	0	1	0	0	0	0	2	0	0	0	0	0	0	0	3	0	0	1	1	0	0	0	0	0	0	2	0	0	0	0	0	1
>k141_213772	693	11	0	0	0	0	2	6	5	0	2	0	0	0	9	2	0	0	0	0	0	3	5	0	2	0	0	0	0	0	0	0	1	7	0	3
>k141_216837	585	0	2	0	0	1	0	0	0	0	0	0	0	0	2	4	0	0	0	0	0	6	0	0	0	0	0	0	0	0	0	0	0	4	0	0
>k141_217313	294	0	0	0	0	0	0	0	0	0	0	0	0	0	0	4	0	0	0	0	0	2	0	0	0	0	0	0	0	2	0	0	0	1	0	2
>k141_217843	321	0	0	0	0	0	0	0	0	0	0	0	0	0	0	0	0	0	0	0	0	0	8	0	1	0	0	0	0	0	0	0	0	0	0	0
>k141_219805	1626	0	0	0	1	3	0	3	0	0	0	5	0	0	0	6	6	4	16	0	22	0	28	19	26	10	4	15	2	4	2	4	4	0	0	1
>k141_220145	825	3	0	1	0	0	0	2	0	0	2	0	0	0	0	3	6	0	9	0	9	5	12	3	3	1	0	2	2	0	4	0	12	0	2	0
>k141_220596	444	0	0	0	0	0	0	0	0	0	0	2	2	0	0	0	0	0	0	0	0	8	0	0	0	0	0	0	0	2	0	0	0	1	0	0
>k141_222397	252	0	2	0	0	0	0	0	0	0	0	0	0	0	0	0	0	0	0	0	0	0	0	0	0	0	0	0	0	0	0	0	0	0	0	0
>k141_222885	705	4	0	0	0	0	0	0	1	0	0	5	0	2	3	14	1	2	0	0	3	15	7	2	2	0	0	0	0	4	2	0	2	4	2	4
>k141_224925	636	2	11	0	0	13	6	8	0	4	2	2	6	5	2	1	0	3	0	8	0	1	2	0	3	2	0	2	2	2	2	0	4	1	4	0
>k141_225441	516	1	0	0	0	0	0	0	0	0	0	0	0	0	1	8	0	0	0	0	0	4	0	0	2	0	0	0	0	0	0	0	0	2	0	0
>k141_226029	3354	4	0	0	12	0	0	0	0	0	32	5	0	0	0	0	14	6	29	0	4	0	2	1	0	0	0	0	25	65	0	0	32	3	0	0
>k141_226990	261	0	0	0	0	0	0	0	0	0	0	0	0	0	0	6	0	0	0	0	0	0	0	0	0	0	0	0	0	0	0	0	0	3	0	0
>k141_230415	456	0	2	0	0	1	0	0	0	2	0	2	2	0	6	0	0	0	0	0	0	0	0	0	0	0	2	1	0	1	2	0	2	0	0	0
>k141_231729	669	9	20	3	13	21	5	2	4	13	10	9	5	8	11	16	9	15	4	11	10	32	17	12	14	19	4	11	11	13	27	4	16	13	19	9
>k141_232949	594	2	0	0	0	0	0	0	1	0	0	0	0	0	0	3	0	0	0	0	0	1	11	2	5	0	0	0	0	0	2	0	0	0	0	0
>k141_240329	1800	6	0	0	2	2	0	4	6	0	2	2	0	14	3	29	0	2	0	0	0	21	2	0	0	0	0	0	0	12	0	0	2	45	0	4
>k141_243342	1932	0	0	0	0	0	0	0	0	2	2	0	2	0	0	40	176	162	183	28	2	120	132	87	147	0	9	0	2	8	0	0	2	27	0	10
>k141_243604	327	0	0	0	0	0	0	0	0	0	0	0	0	2	0	1	0	0	0	0	0	0	3	0	0	0	0	0	0	0	0	0	0	0	0	0
>k141_244026	306	0	0	0	0	0	0	0	0	0	0	0	0	8	0	0	0	0	0	0	0	0	4	0	0	0	0	0	0	0	0	0	0	0	0	0
>k141_245124	354	0	0	0	0	0	0	0	0	0	0	0	0	0	0	0	0	0	0	0	0	2	0	0	0	0	0	0	2	5	0	0	0	2	0	0
>k141_245642	444	0	0	0	0	0	0	0	0	0	0	0	0	0	0	0	2	0	0	0	0	0	8	0	1	0	0	0	0	0	0	0	0	0	0	0
>k141_247577	474	1	0	0	0	0	0	0	0	0	3	2	0	0	0	0	0	0	0	0	2	8	0	0	4	0	0	0	0	6	1	0	3	2	0	1
>k141_247755	300	0	0	0	0	0	0	0	0	0	0	0	0	0	0	0	0	0	0	0	2	2	5	0	0	0	0	0	0	0	0	0	0	2	0	0
>k141_248762	342	0	0	0	0	0	0	0	0	0	0	0	0	0	0	0	0	0	0	0	0	0	0	0	0	0	0	0	0	0	0	0	0	5	0	2
>k141_248877	3876	6	42	4	21	65	0	6	0	42	0	2	8	3	16	0	0	72	0	94	0	0	2	12	4	16	2	10	4	4	10	0	5	13	14	0
>k141_249154	729	4	0	0	0	0	0	2	0	0	0	0	0	0	0	4	1	0	4	0	0	1	0	0	2	0	0	0	0	0	2	0	2	2	0	0
>k141_250299	375	0	0	0	0	0	0	0	0	0	0	0	0	0	0	0	0	0	0	0	0	4	0	0	0	0	0	0	0	0	4	0	0	0	0	0
>k141_251528	449	0	0	0	0	0	0	0	1	2	2	0	0	0	0	0	0	0	0	0	0	0	0	0	2	0	0	0	0	0	2	0	0	0	0	2
>k141_252737	1233	0	4	8	0	2	0	0	0	0	0	0	1	6	24	4	0	0	0	0	0	4	0	0	0	0	0	0	0	0	0	0	0	21	2	4
>k141_252916	477	5	0	0	0	2	0	0	0	0	0	0	0	0	0	0	0	0	0	0	0	0	0	0	0	0	2	0	0	1	0	0	0	22	0	4
>k141_256000	393	0	0	0	0	0	0	0	0	0	0	0	0	8	0	2	0	0	0	0	0	0	1	0	0	0	0	0	0	0	0	0	0	0	0	0
>k141_259169	813	1	0	0	2	0	0	0	2	0	0	0	0	2	0	6	0	1	1	0	0	0	5	0	0	0	0	0	0	14	0	0	5	0	0	0
>k141_259499	396	0	0	0	0	0	0	0	0	0	0	0	0	0	0	0	2	0	3	0	0	0	0	0	0	0	0	0	0	2	0	0	2	0	0	0
>k141_259661	567	1	0	0	0	0	0	0	0	0	0	3	0	1	0	1	5	3	0	2	1	4	6	4	7	0	0	2	1	2	1	6	2	0	1	0
>k141_261412	744	4	0	0	2	0	0	0	0	0	0	0	1	2	0	2	0	0	0	0	2	11	0	0	0	0	0	0	0	0	2	0	3	2	0	0
>k141_263135	339	2	0	0	0	0	0	0	0	0	0	0	0	0	0	0	0	0	0	0	0	0	0	0	0	0	0	0	0	0	0	0	0	4	0	0
>k141_263820	321	0	0	0	0	2	0	2	0	0	2	0	0	1	0	0	0	0	0	0	0	5	0	0	1	0	0	0	0	0	0	0	4	4	0	5
>k141_263978	414	0	0	0	0	0	0	0	0	0	0	0	0	0	0	2	0	0	0	0	0	6	0	0	0	0	0	0	0	0	0	0	0	0	0	0
>k141_264667	789	0	2	2	0	0	0	0	2	0	0	2	0	1	26	1	0	0	0	0	0	1	0	0	0	0	0	0	2	0	2	0	0	7	0	0
>k141_265627	930	4	0	0	4	0	0	3	0	0	4	14	0	9	0	4	0	0	1	0	0	3	3	0	9	0	0	2	2	3	0	0	4	1	0	0
>k141_266681	372	0	0	0	0	0	0	0	0	0	0	0	0	0	0	0	2	0	0	0	0	0	0	4	0	0	0	0	0	2	0	0	4	0	0	0
>k141_269006	297	0	0	0	0	0	0	0	0	0	0	0	0	0	0	5	0	3	0	2	0	3	0	2	2	0	0	0	0	2	0	0	0	0	0	0
>k141_270140	504	1	0	0	0	0	0	0	0	0	1	1	0	1	0	4	0	0	0	0	0	3	0	0	0	0	0	1	0	1	0	0	0	0	0	5
>k141_270304	729	0	0	0	0	0	0	4	0	0	0	0	0	0	10	0	0	0	2	0	0	2	2	0	0	0	0	0	6	0	0	0	0	3	0	0
>k141_270707	429	2	0	0	0	2	0	2	0	0	2	3	0	2	1	7	0	1	0	6	6	13	4	1	4	0	0	0	3	4	2	0	3	10	0	1
>k141_270722	258	0	0	0	0	0	0	0	0	0	0	0	0	0	0	0	0	0	0	0	0	0	1	0	0	0	0	0	0	1	0	0	4	0	0	0
>k141_273344	387	0	0	0	0	0	0	0	0	0	0	0	0	0	0	2	0	0	0	0	0	0	0	0	0	0	0	0	1	0	0	0	3	0	0	0
>k141_273355	765	0	0	0	0	0	0	0	0	0	1	0	0	1	2	0	2	0	0	0	0	0	4	0	0	4	4	0	2	2	4	0	8	2	1	0
>k141_277869	465	0	0	0	0	0	0	0	0	0	0	0	0	4	6	0	0	0	0	0	0	2	0	0	0	0	0	0	0	0	0	0	0	2	0	2
>k141_278108	1017	1	0	0	0	0	0	0	0	0	0	0	0	8	0	17	1	0	2	0	0	15	0	0	0	0	0	0	0	4	2	0	0	0	0	2
>k141_279499	447	1	0	0	0	0	0	0	0	0	0	2	0	0	2	0	0	0	0	0	0	2	0	1	0	0	0	0	3	3	0	0	1	2	0	2
>k141_282273	360	1	3	0	0	2	0	0	0	0	2	0	1	1	0	11	0	0	1	0	0	8	0	0	0	0	0	2	2	1	2	0	5	1	0	0
>k141_283267	1203	0	32	10	0	8	2	2	2	0	2	2	0	3	5	0	0	0	0	0	0	2	0	0	0	0	0	0	2	0	0	0	0	0	0	4
>k141_284814	738	2	0	0	0	7	0	0	0	0	1	0	4	4	0	17	0	0	2	0	0	6	2	0	0	0	0	0	0	13	0	0	5	3	0	0
>k141_284923	702	0	0	0	0	2	0	0	0	0	4	2	0	0	5	0	0	0	0	0	0	0	4	0	0	0	0	0	2	0	0	0	0	0	0	0
>k141_286246	1062	0	0	0	0	0	0	0	0	0	0	0	1	1	1	1	0	2	2	0	0	0	15	16	12	0	0	0	0	0	0	0	0	1	1	0
>k141_286918	408	0	0	0	0	0	0	0	0	0	2	0	0	0	0	2	0	2	0	0	0	6	2	0	0	0	0	0	0	2	0	0	0	3	0	1
>k141_287157	978	0	0	0	0	0	0	0	0	0	0	0	0	0	0	2	0	0	0	0	0	10	59	4	5	0	0	0	0	0	0	0	0	0	0	0
>k141_292094	780	22	5	11	16	26	9	15	2	8	20	26	0	2	7	0	3	10	2	2	5	1	28	5	25	13	11	9	13	5	9	6	8	7	16	4
>k141_294257	651	0	0	0	0	2	0	0	0	3	0	0	0	2	3	2	0	2	0	2	0	2	0	0	0	0	0	0	0	0	0	0	0	0	0	0
>k141_295498	342	1	0	0	0	1	0	0	0	0	0	0	0	0	0	0	0	0	4	0	0	0	4	0	2	0	0	0	0	0	0	0	0	0	0	0
>k141_296340	852	4	0	0	1	0	0	6	0	0	0	0	0	0	0	0	0	0	0	0	0	2	1	2	2	0	0	0	0	0	0	0	0	0	0	0
>k141_296368	396	0	0	0	0	0	0	0	0	0	0	0	0	0	0	0	2	0	0	0	0	0	0	0	0	0	0	0	0	2	0	0	0	0	0	0
>k141_299458	255	0	0	0	0	0	0	0	0	0	0	0	0	0	0	0	0	0	0	0	0	2	2	0	6	0	0	0	0	3	0	0	0	0	0	0
>k141_300569	432	2	0	0	0	0	0	0	0	0	0	0	0	1	0	0	0	0	0	0	0	0	0	0	2	0	0	0	2	0	0	0	2	0	0	0
>k141_300725	300	0	0	0	0	0	0	0	0	0	0	0	0	0	0	0	0	0	2	0	0	0	0	0	0	0	0	0	0	2	0	0	0	2	0	0
>k141_304103	375	0	0	0	0	0	0	2	0	0	1	1	0	0	0	0	0	0	0	0	0	0	0	0	0	0	0	0	0	0	0	2	0	0	0	0
>k141_304436	1008	2	2	0	0	0	0	0	0	0	0	0	0	5	7	2	4	0	2	0	2	6	10	2	0	0	2	0	0	5	0	0	0	35	0	0
>k141_304468	306	2	2	0	0	0	0	0	0	0	0	0	0	0	0	0	0	0	0	0	0	0	0	0	0	0	0	0	0	0	0	0	0	4	0	0
>k141_306683	366	0	0	0	0	0	0	0	0	0	0	4	0	0	0	0	0	0	0	0	0	0	0	2	0	0	0	2	0	0	2	0	0	0	0	0
>k141_307778	270	0	0	0	0	0	0	0	0	0	0	0	0	0	0	7	0	0	0	0	0	1	2	0	2	0	0	0	0	0	0	0	0	0	0	0
>k141_307824	357	0	0	4	0	4	0	0	0	0	0	0	4	9	3	2	0	0	0	0	0	0	0	0	0	0	0	0	0	0	1	0	1	0	2	0
>k141_308513	315	0	0	0	0	0	0	0	0	0	0	0	0	0	0	0	0	0	0	0	0	0	0	0	0	0	0	2	1	0	0	0	0	0	0	0
>k141_308637	381	0	0	0	0	0	0	0	0	0	1	4	0	0	0	0	0	0	0	0	0	0	0	2	0	0	0	0	0	0	0	1	2	0	0	0
>k141_308800	830	0	0	0	0	0	0	0	0	0	0	2	0	1	0	0	0	0	0	0	0	0	0	0	0	0	0	0	0	0	0	0	0	29	0	0
>k141_308927	351	0	0	0	0	0	0	1	0	0	0	0	0	0	0	0	0	0	0	0	0	2	0	2	0	0	0	0	0	0	0	0	0	0	0	2
>k141_310241	312	0	0	0	0	0	0	0	0	0	0	0	0	0	0	0	0	0	0	0	2	0	4	0	2	0	0	0	0	0	0	0	0	0	0	0
>k141_311262	324	0	0	0	0	0	0	0	0	0	0	0	0	0	0	0	0	0	0	0	0	0	0	2	0	2	0	0	0	1	3	0	0	0	0	0
>k141_311960	303	0	0	0	0	0	0	2	0	0	0	0	0	1	0	0	0	1	0	0	0	0	0	0	0	0	0	0	0	2	3	0	0	1	3	0
>k141_312137	1026	2	0	0	1	0	0	1	2	0	1	4	2	5	10	32	0	0	0	0	0	1	0	0	0	0	0	0	0	2	2	0	0	25	0	0
>k141_315512	1329	2	20	8	9	8	0	0	23	10	45	66	0	4	33	2	20	5	12	2	43	0	44	18	38	5	12	28	46	139	127	8	97	8	15	7
>k141_316424	585	0	0	0	0	0	0	0	0	0	0	0	1	0	0	1	2	6	3	2	0	0	2	0	0	0	0	0	2	4	0	0	0	2	0	0
>k141_317294	579	1	0	0	1	4	0	3	0	1	0	0	0	1	4	1	4	2	2	0	2	8	0	4	2	1	0	0	11	6	0	0	7	4	1	1
>k141_317495	741	11	110	6	3	36	0	18	34	91	80	74	47	110	448	1	106	229	65	161	87	0	26	20	45	186	108	72	163	89	142	50	92	229	125	41
>k141_317600	534	0	15	5	0	2	0	1	4	8	22	30	14	16	119	0	165	118	84	101	67	0	15	59	62	68	90	126	90	63	77	25	76	70	41	13
>k141_320787	333	0	0	0	0	0	0	0	0	0	0	0	0	0	0	0	0	0	0	0	0	0	0	0	0	0	0	0	0	0	0	0	0	0	8	0
>k141_321100	426	0	0	0	0	0	0	0	0	0	0	1	0	0	4	0	0	0	0	0	0	0	2	0	0	0	4	0	0	0	2	0	0	2	2	0
>k141_321311	351	0	0	0	0	0	0	0	0	0	0	0	0	0	0	2	0	0	0	0	0	9	0	0	0	0	0	0	0	0	0	0	0	2	0	1
>k141_322562	2357	3	57	30	0	7	0	0	0	0	12	6	1	6	19	4	0	0	0	0	2	0	7	0	2	0	0	0	0	2	2	10	4	2	4	8
>k141_322817	693	4	6	4	13	20	4	5	0	4	5	3	0	1	3	0	0	2	5	4	7	1	6	4	10	10	4	6	1	2	13	3	7	1	7	2
>k141_325693	879	20	47	81	86	51	28	60	29	110	88	94	114	76	109	1	166	192	69	142	85	1	21	69	63	130	98	76	79	71	132	23	112	120	290	41
>k141_325764	702	6	9	0	10	0	0	2	0	0	0	0	0	0	0	0	0	0	0	0	0	0	0	0	0	0	0	0	0	0	0	0	0	0	0	0
>k141_326624	285	0	0	0	0	0	0	0	0	0	0	0	0	0	0	0	0	0	0	0	0	0	1	0	0	0	0	0	0	0	0	0	0	0	0	0
>k141_326948	549	0	0	0	2	0	0	0	0	0	4	5	0	0	0	0	0	0	0	0	0	0	0	0	0	0	0	0	0	0	0	0	0	0	0	0
>k141_327485	426	0	0	0	0	0	0	0	0	0	0	0	0	0	0	0	0	0	0	0	0	0	0	0	0	0	0	0	2	0	0	0	2	0	2	1
>k141_327589	453	0	0	0	0	0	0	0	2	0	2	0	0	0	0	0	2	0	2	0	0	2	0	0	1	0	0	0	0	0	0	0	0	0	0	0
>k141_328502	1332	0	0	0	0	0	0	0	0	0	2	0	0	0	0	0	2	0	17	0	30	0	0	2	0	0	0	0	2	0	0	0	2	0	0	0
>k141_329793	1083	0	0	0	0	0	0	2	0	0	0	0	0	4	0	4	0	0	2	0	0	6	0	0	4	0	0	0	0	2	0	0	5	2	0	0
>k141_332021	924	0	0	0	0	0	0	2	0	0	0	0	0	0	8	0	0	0	0	0	0	12	0	0	2	0	0	0	0	5	0	0	2	4	0	0
>k141_332657	453	0	0	0	0	0	0	0	1	0	0	4	0	0	5	2	0	0	0	0	1	0	1	0	2	0	0	0	0	0	0	0	0	8	0	4
>k141_332849	462	0	0	0	0	0	0	0	0	0	0	0	0	0	0	1	0	2	2	0	3	0	3	0	2	0	0	0	0	0	0	0	0	0	0	0
>k141_334603	336	2	0	0	0	0	0	0	0	0	2	0	0	0	0	0	0	0	0	0	0	1	0	0	0	0	0	0	0	0	0	0	0	0	0	2
>k141_334877	318	0	0	0	0	0	0	0	0	0	0	0	0	0	2	2	0	0	0	0	0	0	0	0	0	0	0	0	0	0	0	0	0	0	0	0
>k141_336115	351	9	24	3	0	3	2	4	2	12	18	20	7	23	96	0	11	32	15	18	7	0	0	2	1	42	25	7	7	5	18	8	4	24	9	6
>k141_338514	534	0	0	0	0	0	0	0	0	0	0	0	0	0	0	1	4	0	1	0	1	0	0	0	0	0	2	0	2	2	0	0	2	0	0	0
>k141_340350	708	5	10	0	0	0	0	0	0	0	0	0	0	6	0	28	0	5	0	0	0	31	1	0	3	0	0	0	0	4	0	0	0	4	0	4
>k141_340505	480	0	0	0	0	0	0	0	0	0	2	0	0	0	1	8	0	0	0	0	0	6	1	0	2	0	2	0	4	3	0	0	0	7	0	0
>k141_344404	669	6	0	0	0	0	0	3	0	0	0	0	0	0	1	16	0	0	0	0	0	3	0	0	0	0	0	0	0	0	0	0	0	0	0	3
>k141_345092	630	0	0	0	0	0	0	0	0	0	0	0	0	0	0	0	0	0	0	0	0	8	27	0	11	0	0	0	0	0	0	0	0	0	0	0
>k141_345487	570	0	0	0	0	0	0	0	1	1	2	0	0	0	0	4	0	0	0	0	2	0	1	0	0	0	0	0	0	0	0	0	0	12	0	2
>k141_348325	585	0	0	0	0	3	0	1	0	2	0	0	2	0	2	0	0	1	0	0	0	0	0	0	4	0	0	0	0	2	0	0	0	3	0	0
>k141_348326	360	0	0	0	0	0	0	0	0	0	0	0	0	0	0	0	2	0	0	0	0	9	5	0	0	0	0	0	0	0	0	0	0	0	0	0
>k141_349043	540	0	0	0	0	0	0	0	0	0	0	0	0	0	8	1	0	0	0	0	0	2	0	0	0	0	0	0	0	0	0	0	0	2	0	0
>k141_351381	576	471	811	1145	981	1108	669	1208	452	856	541	1021	1166	1177	946	0	227	389	173	484	107	4	68	313	169	311	99	343	123	102	312	197	239	87	1216	379
>k141_352754	390	0	2	0	2	2	0	2	0	0	0	2	0	2	0	5	0	0	0	0	0	0	0	0	0	0	0	0	0	0	0	0	2	0	2	0
>k141_352913	612	0	4	0	0	4	1	0	0	1	1	0	2	2	0	2	0	0	0	0	0	0	2	0	0	0	0	0	1	0	0	0	0	4	0	2
>k141_353470	339	0	0	0	0	0	0	0	0	0	0	1	1	0	0	0	0	0	0	0	0	2	0	0	0	0	0	0	0	0	1	0	0	0	0	0
>k141_354001	372	0	0	2	5	6	0	0	0	0	0	0	0	0	0	0	0	0	0	0	0	0	0	0	0	0	0	0	0	0	0	0	0	0	0	0
>k141_354366	441	0	0	0	0	0	0	0	0	0	0	0	0	0	0	0	0	0	0	0	2	0	0	0	0	0	0	0	0	0	0	0	0	0	0	0
>k141_354524	4158	26	4	10	31	2	27	0	0	1	31	36	2	6	6	21	6	1	6	2	0	13	14	23	16	0	0	2	2	19	6	9	14	67	2	8
>k141_354815	330	0	0	0	2	0	0	0	0	0	0	0	0	0	0	2	0	0	0	0	0	4	2	0	0	0	0	0	0	0	0	0	0	0	0	0
>k141_356641	510	39	50	62	75	71	32	88	39	68	53	101	103	116	80	0	3	47	12	56	13	0	4	23	13	20	12	9	17	0	24	18	13	15	130	31
>k141_357054	216	0	3	0	6	4	0	0	1	2	5	3	2	0	11	0	2	3	2	2	10	0	1	0	0	2	1	4	12	15	17	2	13	0	6	0
>k141_357070	576	4	0	2	0	7	1	0	0	0	3	5	0	0	0	2	0	0	3	4	0	0	3	1	2	2	2	0	4	6	7	2	1	3	0	0
>k141_358249	327	0	0	0	0	0	0	0	0	0	1	0	0	0	6	0	0	0	0	0	0	0	0	0	0	0	0	0	2	0	0	0	0	1	0	2
>k141_358390	336	0	0	0	0	0	0	0	0	0	0	0	0	0	1	0	0	0	0	2	0	0	0	0	0	5	0	0	0	0	0	0	0	0	0	0
>k141_358432	414	0	0	0	0	0	0	0	0	0	0	0	0	0	0	6	0	0	0	0	0	0	7	0	0	0	0	0	2	0	0	0	0	0	0	0
>k141_359039	336	0	0	0	0	0	0	0	0	0	0	0	0	0	15	6	0	1	0	0	0	0	0	0	0	0	0	0	0	0	0	0	0	0	0	0
>k141_359418	426	0	0	1	0	0	0	0	0	0	0	0	0	0	0	0	5	0	2	2	1	0	4	4	3	1	0	0	2	3	0	0	0	0	2	0
>k141_360033	426	317	421	591	550	595	341	638	263	425	317	423	703	724	496	0	45	179	75	190	38	3	25	114	86	150	59	29	74	8	101	63	99	45	573	180
>k141_360241	3378	17	186	48	6	48	0	26	97	36	399	589	29	61	381	5	428	146	262	99	191	0	128	241	285	119	186	133	565	669	837	595	801	388	733	209
>k141_360663	1017	6	0	6	4	0	0	4	0	0	0	0	0	2	2	0	0	0	0	0	0	2	2	0	2	0	0	0	0	0	0	0	0	2	0	3
>k141_360954	384	4	0	0	0	1	0	0	0	0	0	0	0	0	2	0	1	0	0	0	0	2	0	0	1	0	0	0	0	2	1	0	0	3	0	2
>k141_361073	813	2	0	0	0	0	0	0	0	0	2	0	0	2	1	8	1	2	1	0	5	10	0	2	1	0	0	0	1	3	0	0	11	4	0	7
>k141_361867	414	1	2	0	4	0	0	3	0	0	0	0	0	0	0	0	0	0	0	0	0	0	0	0	0	0	0	0	1	0	0	0	0	2	0	0
>k141_362056	558	0	0	0	0	0	0	0	0	0	0	0	0	0	0	0	0	6	4	2	0	0	0	0	2	0	0	0	2	0	0	0	0	0	0	0
>k141_362618	639	0	0	0	0	0	0	0	0	0	0	0	0	0	0	0	0	0	0	0	0	2	2	0	3	0	0	0	0	12	2	0	2	0	0	0
>k141_364630	315	7	0	0	0	0	0	0	0	0	0	0	0	0	0	0	0	0	0	0	0	0	0	0	0	0	0	0	0	0	0	0	0	0	0	0
>k141_365341	486	0	0	0	0	0	0	0	0	0	0	0	0	0	0	0	0	0	0	0	0	0	0	0	0	0	0	0	0	0	0	6	2	0	1	0
>k141_365967	387	408	703	924	733	765	551	1019	444	799	594	918	1124	1008	949	3	219	440	179	463	157	3	47	270	177	277	118	266	190	75	363	172	212	104	1123	397
>k141_366058	393	0	0	0	0	0	0	0	0	0	0	0	0	0	0	0	0	0	0	0	0	0	0	0	4	0	0	0	0	0	0	0	0	0	0	0
>k141_366936	1164	4	0	0	0	0	0	0	0	0	0	2	0	0	2	0	0	14	1	5	19	1	0	0	1	0	0	0	0	1	0	2	4	9	0	5
>k141_367094	996	0	0	0	0	0	0	0	0	0	0	0	0	0	0	0	12	0	4	0	6	0	0	4	2	0	0	0	2	3	4	0	1	0	0	0
>k141_367150	399	0	0	0	0	0	0	0	0	0	0	0	1	2	0	0	0	2	0	0	0	5	1	0	0	2	0	0	0	3	1	0	0	2	0	0
>k141_367481	339	0	0	0	0	0	0	0	0	0	0	0	0	0	0	4	2	0	0	0	0	6	7	3	3	0	0	1	0	2	0	0	0	0	0	0
>k141_369163	1314	18	0	0	5	0	0	7	0	0	0	0	7	18	0	17	0	0	4	0	0	31	7	0	4	0	0	0	0	54	0	0	12	7	0	6
>k141_369726	327	0	0	0	0	0	0	0	0	0	0	0	0	0	4	11	0	0	0	0	0	4	0	0	0	0	0	0	0	0	0	0	0	6	0	1
>k141_370915	510	0	0	0	0	0	0	0	0	0	0	0	0	0	2	0	0	1	0	0	0	0	10	2	0	0	0	2	0	1	0	0	2	2	0	0
>k141_371017	444	2	0	0	2	0	0	2	4	0	0	4	0	0	0	4	0	0	0	0	0	0	0	0	4	0	0	0	0	0	0	0	0	4	0	0
>k141_372079	300	0	0	0	0	0	0	0	0	0	0	0	0	2	0	0	0	0	0	0	0	2	0	0	0	0	0	0	2	0	0	0	0	0	0	0
>k141_372726	519	2	0	0	1	0	0	2	0	0	0	0	2	0	0	0	0	0	0	4	0	0	0	2	0	0	0	0	0	0	2	0	0	1	5	0
>k141_372749	1068	0	0	0	0	0	0	0	0	0	0	0	0	0	0	0	0	0	0	0	0	0	0	2	0	0	0	0	0	7	5	4	35	0	0	0
>k141_372753	1461	4	2	2	3	0	0	14	0	0	0	2	1	7	4	6	0	0	3	2	0	6	8	2	4	0	0	0	0	1	1	0	4	30	2	2
>k141_373676	957	17	10	4	24	22	13	11	2	4	11	18	2	2	6	1	0	4	2	7	3	5	15	13	8	14	4	4	10	2	11	8	0	2	15	2
>k141_374473	300	0	0	0	0	0	0	0	0	0	2	0	0	2	0	7	0	0	0	0	0	1	1	0	0	0	0	0	0	0	2	0	0	0	0	0
>k141_375283	546	0	0	0	0	0	0	0	0	0	0	0	0	2	0	8	1	0	0	0	0	4	6	0	6	0	0	0	0	0	2	0	2	0	0	0
>k141_375558	396	1	0	0	0	0	0	0	0	0	0	0	0	2	1	2	1	0	0	0	2	2	0	0	0	0	0	0	0	0	0	0	0	2	0	0
>k141_376621	579	0	0	0	0	0	0	0	0	0	0	0	0	2	2	11	0	0	0	0	0	0	0	0	0	0	1	0	0	0	0	0	0	0	0	0
>k141_376935	468	0	0	1	0	0	0	0	0	0	0	0	1	2	0	12	0	0	0	0	0	4	3	0	0	0	0	0	0	0	7	0	0	2	0	0
>k141_377283	843	0	0	0	0	0	0	0	0	0	0	0	0	0	0	0	0	0	5	0	3	1	0	0	2	0	0	0	0	4	0	0	4	0	0	0
>k141_377689	924	17	0	2	6	0	0	2	0	0	0	0	0	10	0	4	0	0	0	0	0	2	4	0	0	0	0	0	0	9	0	0	2	2	0	0
>k141_378589	315	0	0	0	0	0	0	0	0	0	0	0	0	0	0	0	0	0	0	0	0	0	0	1	1	0	0	0	0	1	2	0	0	0	0	0
>k141_379339	2451	2	32	2	22	15	0	6	37	6	93	192	0	10	72	1	46	12	37	10	49	0	110	51	75	28	34	26	131	186	205	18	184	22	67	17
>k141_379391	351	0	0	0	0	0	0	0	0	0	0	0	0	0	0	0	0	0	0	0	0	0	0	0	0	0	0	0	0	0	0	0	2	0	2	0
>k141_380832	291	0	0	0	0	0	0	0	0	0	0	0	0	2	2	4	0	0	0	0	1	0	0	0	0	0	0	0	0	0	0	0	0	0	0	0
>k141_381710	519	8	0	0	0	3	0	0	0	0	0	1	0	4	7	6	0	0	0	0	0	2	0	0	0	0	0	0	0	0	0	0	0	8	0	0
>k141_382013	348	1	0	0	0	0	0	0	0	0	1	2	2	0	4	0	0	4	3	5	0	0	1	3	3	7	7	0	1	2	0	0	2	1	1	1
>k141_382544	297	0	0	0	0	0	0	0	0	0	0	0	0	0	0	0	0	0	0	0	0	2	0	0	0	0	0	0	0	0	0	0	0	5	0	0
>k141_382889	993	0	0	0	0	0	0	0	0	0	4	2	0	0	0	0	0	0	2	0	4	0	4	4	2	2	0	0	0	0	0	0	2	0	0	0
>k141_384856	648	0	2	2	0	0	0	2	0	2	2	7	0	0	0	0	0	0	2	0	0	0	0	0	0	0	0	0	0	0	0	0	0	0	0	0
>k141_384971	459	0	0	0	0	0	0	0	0	0	0	0	0	0	2	0	0	0	0	0	0	0	0	0	2	0	0	4	1	0	2	0	0	3	0	0
>k141_385119	348	2	0	4	0	0	2	0	0	0	0	0	0	0	0	0	0	0	0	0	0	0	0	0	0	0	0	0	0	0	0	0	0	0	0	0
>k141_385436	654	5	1	2	0	2	0	1	5	0	1	2	0	2	5	0	0	3	0	2	3	2	4	3	2	11	7	1	7	2	7	3	3	6	5	0
>k141_385621	1335	0	0	0	0	0	0	0	0	0	0	0	0	0	0	0	0	0	4	0	0	0	0	0	0	0	0	0	0	6	0	0	53	0	0	0
>k141_386511	558	0	0	2	2	2	0	0	0	0	0	5	1	0	0	0	0	0	3	0	2	0	3	0	3	3	2	1	0	4	6	1	2	1	2	0
>k141_387282	585	0	0	0	0	0	0	0	0	0	2	0	0	0	7	0	0	0	2	0	0	0	0	0	2	0	0	0	0	0	3	0	0	0	0	0
>k141_387670	468	0	0	0	0	0	0	0	0	0	2	2	0	4	2	0	1	0	2	2	0	0	0	0	0	0	0	0	0	0	0	0	0	0	0	4
>k141_388025	414	0	2	2	1	2	0	0	0	2	0	0	0	0	0	0	0	0	0	0	0	0	0	0	0	0	0	0	0	0	0	0	0	2	0	0
>k141_389144	303	0	0	0	5	3	0	0	0	0	0	0	0	2	4	0	0	0	0	2	0	0	0	0	0	2	0	0	0	0	0	0	0	0	0	0
>k141_389365	348	0	0	0	0	0	0	0	0	0	2	0	0	4	6	0	0	2	0	0	0	1	0	0	0	0	0	0	0	0	0	0	0	0	0	4
>k141_389506	468	0	0	0	0	0	2	0	0	0	0	0	0	0	1	0	0	0	0	0	0	3	0	0	0	0	0	0	0	0	0	0	0	3	0	0
>k141_389541	810	36	0	0	4	0	0	6	1	0	2	0	7	2	0	19	1	1	1	0	0	23	7	1	11	0	0	0	0	46	0	0	9	28	0	0
>k141_389644	540	0	0	0	4	0	0	0	0	2	0	0	2	0	0	0	0	0	2	0	2	0	2	0	2	0	0	0	0	0	0	0	0	0	0	0
>k141_390177	459	2	0	0	0	0	0	0	0	1	0	0	0	0	0	0	0	0	0	0	2	1	0	0	0	0	0	0	0	0	0	0	0	3	0	2
>k141_390650	396	0	0	0	0	0	0	0	0	0	0	0	0	0	0	0	0	4	0	0	0	0	0	4	7	0	0	0	0	0	0	0	2	0	0	0
>k141_391800	606	12	132	25	17	11	1	5	21	49	54	86	42	38	272	0	112	145	72	175	71	3	18	14	26	190	92	49	147	79	230	72	114	126	105	36
>k141_394510	525	0	0	0	0	0	0	0	0	0	0	0	0	1	0	4	0	0	0	0	0	6	0	0	0	0	0	0	0	0	0	0	0	2	0	4
>k141_395640	1191	6	2	0	2	2	0	3	3	0	10	4	0	8	5	23	2	4	2	0	4	29	4	2	2	0	0	0	6	7	3	0	2	12	0	6
>k141_397455	342	8	0	0	0	0	0	3	0	0	0	0	0	4	0	3	0	0	0	0	0	7	0	1	0	0	0	0	0	0	0	0	0	5	0	1
>k141_397610	330	0	2	0	0	0	0	0	0	0	0	0	2	1	0	0	0	0	2	2	0	2	0	0	0	0	0	0	0	0	0	0	0	2	0	0
>k141_398232	303	0	0	0	0	0	0	0	0	0	0	0	0	0	0	0	0	0	0	2	0	0	1	0	0	0	0	0	0	0	0	0	0	0	0	0
>k141_398573	273	4	0	0	0	0	0	0	0	0	0	0	0	0	0	1	0	0	0	0	0	0	0	0	0	0	0	0	0	0	0	0	2	0	0	0
>k141_399819	954	1	2	0	1	0	1	0	1	2	0	0	0	1	2	0	0	4	0	2	2	1	2	2	4	2	2	4	2	2	8	4	0	0	6	0
>k141_400029	354	0	0	0	0	0	0	0	0	0	5	0	0	0	0	0	0	0	0	0	0	0	0	0	0	0	0	0	0	0	0	0	0	0	0	0
>k141_400057	420	0	0	0	0	0	0	0	0	0	0	0	0	0	0	0	0	0	0	0	0	0	0	0	4	0	0	0	2	0	4	0	0	0	0	0
>k141_400512	393	0	0	0	0	0	0	0	0	0	0	0	0	0	0	0	0	0	2	0	2	0	0	0	0	0	0	0	0	0	0	0	0	0	0	0
>k141_401215	825	2	0	2	0	2	0	4	1	0	2	0	0	2	4	2	0	4	4	0	2	5	3	4	2	0	0	2	6	4	0	0	3	11	0	2
>k141_401274	438	0	0	0	0	0	0	0	0	0	0	0	0	0	0	0	0	0	0	0	0	8	3	0	0	0	0	0	0	0	0	0	0	0	0	0
>k141_402211	633	2	0	0	0	0	0	13	0	0	2	0	0	2	0	1	0	2	0	0	0	0	0	0	0	0	0	0	0	0	0	0	0	0	2	0
>k141_402539	309	0	0	0	0	0	0	0	0	0	0	0	0	0	0	0	4	2	0	0	2	0	0	0	0	0	0	0	0	0	0	0	0	0	0	0
>k141_402776	612	0	0	0	0	0	0	0	0	0	0	0	0	0	1	2	0	2	0	0	4	17	3	1	2	0	0	0	0	4	0	0	2	1	0	5
>k141_402884	750	2	0	0	2	1	0	0	0	0	2	0	0	0	6	14	0	0	0	0	0	4	2	0	0	0	0	0	0	2	0	0	0	6	0	3
>k141_404323	1476	8	39	8	0	16	0	4	4	2	8	6	0	2	13	5	0	5	0	0	2	4	6	0	0	0	0	0	4	2	0	8	1	0	6	4
>k141_404574	387	2	0	2	0	0	0	0	0	0	0	0	0	0	0	0	0	1	0	0	0	0	0	2	0	0	0	0	0	0	1	0	4	3	0	0
>k141_404846	330	1	0	0	0	0	0	0	0	0	0	0	0	0	0	0	0	0	2	0	0	0	0	2	0	0	0	0	0	2	0	0	0	2	0	0
>k141_405128	1296	237	521	581	582	550	312	570	318	494	530	687	677	688	1000	2	353	524	272	486	317	8	87	265	230	433	339	235	721	329	439	171	377	282	1095	300
>k141_405870	408	0	0	0	0	0	0	0	2	0	0	2	0	0	0	8	0	0	0	0	0	2	0	0	0	0	0	0	0	0	0	0	0	0	0	0
>k141_406211	399	0	0	0	0	3	2	2	1	0	1	0	0	0	0	0	0	0	0	0	0	0	0	0	0	0	0	0	0	2	1	0	1	0	0	1
>k141_407476	794	0	2	1	0	0	0	0	0	0	0	2	0	0	2	1	0	0	0	0	3	1	0	0	2	0	0	2	1	0	5	0	2	0	0	0
>k141_407992	300	0	0	0	0	2	0	0	0	0	0	0	0	0	0	0	0	2	0	2	0	0	0	0	0	0	0	0	0	0	0	0	0	0	0	0
>k141_408611	561	4	0	2	0	0	0	0	2	0	0	0	0	0	0	8	0	0	0	0	0	16	0	0	0	0	0	0	0	0	0	0	0	0	0	2
>k141_409081	1836	470	841	939	940	933	631	1044	518	962	635	1044	1147	1161	1303	4	700	1294	401	1303	687	8	123	388	288	1018	1488	314	1069	591	1505	438	1470	1669	1882	369
>k141_410090	465	0	0	0	0	0	0	0	0	0	0	0	0	0	0	1	0	0	0	0	0	0	9	1	3	0	0	0	4	3	0	0	0	0	0	1
>k141_411961	597	0	2	0	0	1	0	0	0	2	0	1	0	3	1	9	0	0	0	0	0	26	1	0	0	0	3	0	0	0	0	0	2	4	0	0
>k141_412722	354	0	0	0	0	0	0	0	0	0	0	0	0	0	2	4	0	1	0	0	0	7	1	0	1	0	0	0	2	2	3	0	3	2	2	1
>k141_414263	2799	0	0	0	0	0	0	0	0	0	0	0	0	0	0	0	6	4	2	0	0	17	151	0	24	0	0	0	0	0	0	0	0	0	0	0
>k141_415688	1599	14	4	11	61	49	16	32	2	2	3	28	0	0	4	0	2	2	6	0	6	0	18	17	14	2	12	2	17	14	2	5	18	0	2	1
>k141_417509	264	48	72	139	117	94	85	109	67	95	91	162	205	190	120	2	8	60	18	50	20	0	4	41	24	49	11	14	25	4	36	23	21	21	257	63
>k141_418573	945	1	112	10	2	18	2	23	28	60	70	80	51	97	462	3	147	175	77	159	68	3	17	55	79	164	84	160	116	58	109	43	81	185	56	42
>k141_419059	1560	68	0	1	13	0	0	15	3	0	4	1	7	15	0	44	2	0	2	0	0	31	15	0	13	0	0	0	0	77	6	0	15	36	0	10
>k141_420856	342	0	0	0	0	0	0	0	0	0	0	0	0	0	0	2	0	0	0	0	0	0	2	0	0	0	0	0	0	1	0	0	0	5	0	0
>k141_421282	327	0	0	0	0	0	0	0	0	0	0	1	0	0	0	1	0	0	0	0	0	0	0	0	0	0	0	0	0	0	1	0	4	2	0	1
>k141_422090	345	0	0	0	0	0	0	0	0	0	0	2	0	0	0	0	0	0	0	0	0	0	0	0	0	0	0	0	6	0	0	0	3	0	0	0
>k141_425989	501	0	4	0	0	0	0	0	2	0	0	0	0	0	0	2	2	0	0	0	0	4	0	0	0	0	0	0	0	0	1	0	2	0	0	0
>k141_426188	969	0	0	0	0	0	0	2	0	0	0	0	0	2	0	0	0	0	0	0	2	0	2	0	0	0	0	2	4	2	4	4	2	0	0	0
>k141_427003	621	3	1	0	0	4	2	0	1	0	0	1	3	0	2	0	3	0	3	1	0	0	7	4	2	10	7	10	3	2	0	1	2	1	0	0
>k141_427967	1140	701	1502	2084	1518	1642	1277	1856	694	1897	1268	1619	2344	1775	1781	1	578	1192	461	1318	480	13	166	590	364	1148	689	402	706	310	1119	339	780	613	3335	578
>k141_428304	291	0	0	0	0	0	0	0	0	0	0	0	0	0	0	0	0	0	0	0	0	0	3	0	5	0	0	0	0	0	0	0	2	0	0	0
>k141_428711	348	0	2	2	0	0	0	0	0	0	0	0	0	0	5	0	0	0	0	0	0	0	0	0	0	0	1	0	0	2	0	0	0	0	0	2
>k141_429116	492	0	0	0	0	0	0	0	0	0	0	0	0	0	2	5	0	0	0	0	2	4	1	0	0	0	0	0	0	3	0	0	0	0	0	0
>k141_429676	342	0	0	0	0	4	0	0	0	0	0	0	2	0	0	2	0	0	0	0	0	4	0	0	0	0	0	0	0	0	0	0	0	0	0	0
>k141_430684	2841	27	9	10	16	21	7	13	0	21	16	34	12	11	3	10	4	7	8	13	8	12	15	11	10	10	2	12	2	8	11	3	4	7	36	2
>k141_430933	378	0	0	0	0	0	0	0	0	0	0	0	0	0	0	0	0	0	0	0	0	3	0	0	6	0	0	0	0	0	0	0	0	2	0	0
>k141_431167	246	0	0	0	0	0	0	0	0	0	0	0	0	0	0	0	0	0	0	0	0	0	1	0	0	0	0	0	1	0	0	0	0	0	2	0
>k141_432393	1020	21	16	6	0	0	0	4	0	0	0	1	0	0	4	0	2	0	0	0	0	0	0	0	0	0	0	0	0	0	0	0	0	0	2	0
>k141_433809	486	0	0	0	0	0	0	0	0	0	0	2	0	0	0	1	0	0	0	0	0	1	0	0	3	0	0	0	2	1	1	0	2	0	0	4
>k141_434004	567	0	0	0	0	0	0	2	0	0	3	0	0	2	4	0	0	0	0	0	0	2	1	0	0	0	0	0	0	1	0	0	0	4	2	2
>k141_434196	405	1	0	0	0	2	0	0	0	0	0	0	0	2	0	0	0	0	0	0	0	0	0	0	0	0	0	0	0	0	0	0	0	9	0	0
>k141_434246	645	0	0	0	0	0	0	0	0	0	0	0	0	0	0	6	0	0	0	0	0	16	0	0	0	0	0	0	0	2	0	0	0	0	0	0
>k141_436000	861	2	3	0	0	1	1	0	0	2	2	2	0	1	0	1	0	1	1	0	0	5	0	2	0	2	2	0	0	0	3	0	0	2	10	1
>k141_437006	1518	12	6	2	2	0	0	0	4	0	0	2	0	6	4	2	0	4	0	0	2	11	3	0	0	0	0	0	2	7	0	0	0	52	0	0
>k141_437135	984	0	1	0	0	0	0	0	0	3	0	0	0	0	0	0	0	20	0	8	0	2	0	0	0	2	0	0	0	0	0	0	0	0	0	0
>k141_437188	1065	0	0	0	0	0	0	0	0	0	0	0	0	0	0	0	4	0	2	0	0	0	30	2	2	0	0	0	0	0	0	0	0	0	0	0
>k141_437367	429	2	0	0	0	0	0	0	0	0	0	0	0	2	0	0	0	0	0	0	0	0	0	0	0	0	0	0	0	5	0	0	0	1	0	0
>k141_437683	399	0	0	0	0	0	0	0	0	0	0	0	0	0	0	0	2	0	0	0	0	0	0	0	0	0	0	0	0	0	0	2	2	0	0	0
>k141_439656	647	0	0	2	0	6	0	0	0	0	2	0	2	0	2	0	0	0	0	0	0	0	7	0	12	0	2	0	0	0	1	0	2	0	0	0
>k141_441041	270	0	0	0	0	0	0	0	0	1	0	0	0	0	0	4	0	0	0	0	0	2	0	0	0	0	0	0	0	2	1	0	1	2	0	0
>k141_441222	396	0	0	0	0	0	0	0	2	0	0	0	0	0	6	0	0	0	0	0	0	0	0	0	0	0	0	0	0	0	0	0	0	10	0	0
>k141_443234	516	0	1	2	0	0	0	0	0	0	0	2	0	0	0	0	0	0	0	0	0	0	1	0	0	2	0	0	0	0	0	0	0	0	3	0
>k141_443768	378	0	0	0	0	0	0	0	0	0	0	0	0	2	0	10	0	0	0	0	0	0	2	0	0	0	0	0	0	0	0	0	0	0	0	0
>k141_444147	351	3	0	0	0	0	0	0	0	0	0	0	0	0	0	2	0	0	0	0	0	0	0	0	0	0	0	0	0	1	0	0	0	0	0	0
>k141_445317	732	0	0	0	0	0	0	0	1	0	0	0	0	7	10	20	0	0	0	0	0	2	0	0	0	0	2	0	1	0	2	0	0	9	0	2
>k141_445668	642	0	0	0	0	0	0	0	0	0	0	2	0	0	2	2	0	4	0	0	0	4	0	0	0	0	0	0	1	4	0	0	0	2	2	0
>k141_446169	342	2	0	2	0	0	0	0	0	0	0	0	0	0	1	1	0	0	0	0	0	0	0	0	0	0	0	0	0	2	0	0	0	2	0	0
>k141_446449	324	13	0	0	0	0	0	0	0	0	2	0	2	3	0	10	0	0	0	0	0	2	1	0	0	0	0	0	0	4	0	0	3	6	0	1
>k141_447334	792	13	6	0	2	0	0	3	0	0	0	0	0	0	0	0	0	0	0	0	0	0	0	0	0	0	0	0	0	0	0	0	0	0	0	0
>k141_450546	573	0	0	0	0	0	0	0	0	2	0	2	0	0	0	2	0	0	0	0	0	5	0	0	0	0	0	0	0	0	0	0	0	4	0	0
>k141_450633	588	0	0	0	0	0	0	0	0	0	0	0	0	0	0	0	0	0	0	0	0	0	0	0	0	0	0	0	4	0	0	1	0	0	2	0
>k141_451653	396	0	0	0	0	0	0	0	0	0	0	0	0	0	1	0	0	0	0	0	0	0	0	0	4	0	0	0	0	0	0	0	2	0	0	0
>k141_451701	957	0	1	0	4	4	2	2	0	0	0	3	0	3	0	4	2	0	0	0	0	3	3	2	2	1	0	0	2	4	1	1	0	5	2	0
>k141_451727	579	0	1	0	0	0	0	0	0	0	0	0	0	0	0	2	0	5	3	0	0	0	4	5	4	0	0	1	1	2	0	0	0	2	0	0
>k141_452708	399	0	0	0	0	0	0	0	0	0	0	2	0	0	7	2	2	0	0	0	6	0	0	0	1	0	0	0	0	1	0	0	0	0	0	0
>k141_453823	669	2	0	0	0	0	0	0	0	0	2	4	0	13	12	10	0	4	2	0	5	7	7	3	2	0	2	0	0	0	0	0	0	1	0	0
>k141_454643	624	0	0	0	0	0	0	0	0	0	0	0	0	0	0	2	0	2	0	0	0	0	1	2	4	0	0	0	0	0	2	0	0	6	0	2
>k141_454682	288	0	0	0	0	0	0	0	0	0	0	0	0	0	0	0	0	0	0	0	2	0	0	2	0	0	0	0	0	0	0	0	0	2	0	1
>k141_455187	675	0	0	0	0	0	0	0	0	2	0	0	0	0	0	4	0	0	1	6	0	1	0	0	0	4	0	2	4	0	4	0	0	1	0	0
>k141_455485	267	3	0	0	0	0	0	0	2	0	0	3	0	2	0	0	0	0	0	0	0	3	0	0	0	0	0	0	0	4	2	0	0	0	0	0
>k141_456125	375	0	0	0	0	0	0	0	0	0	0	0	1	0	0	2	0	0	2	0	0	0	0	0	2	0	0	2	2	0	0	0	0	0	0	2
>k141_456254	1605	18	0	0	2	0	2	7	0	0	0	0	0	2	3	9	2	1	2	0	0	8	116	7	42	0	0	0	1	23	2	0	19	2	0	2
>k141_457286	1899	23	4	0	0	1	0	8	2	1	5	9	1	14	10	34	4	2	2	1	4	29	11	2	6	0	5	0	2	6	3	2	5	19	0	12
>k141_457624	339	8	4	4	2	5	0	2	22	0	1	5	8	1	12	70	2	4	6	2	7	20	12	4	14	6	8	4	6	33	8	15	13	19	6	17
>k141_458236	450	0	0	0	2	1	0	2	1	0	0	0	2	1	0	0	0	0	0	0	0	2	2	0	0	0	0	0	2	2	2	0	0	0	1	0
>k141_458880	375	0	0	0	0	0	0	0	0	0	0	0	0	11	0	0	0	0	0	0	0	1	2	0	0	0	2	0	0	0	0	0	0	0	0	0
>k141_460833	309	0	0	0	0	0	0	0	0	0	0	0	0	2	0	0	0	0	0	0	0	1	0	0	0	0	0	0	0	0	0	0	0	6	0	0
>k141_461557	408	0	0	0	0	0	0	0	0	0	0	0	0	0	0	0	0	0	0	0	0	4	0	0	0	0	0	0	0	0	0	0	0	0	0	0
>k141_462795	4326	20	36	47	137	77	46	10	8	219	24	27	7	14	4	4	3	15	4	31	4	12	2	13	8	74	0	5	5	0	11	5	2	1	60	6
>k141_462886	495	0	0	0	0	0	0	0	0	0	0	0	0	0	0	0	1	0	2	0	0	0	0	2	0	0	0	0	0	2	2	2	2	0	0	0
>k141_463871	783	0	0	0	0	0	0	0	0	0	0	0	0	0	3	0	0	0	0	0	0	2	2	0	0	0	0	0	0	0	2	2	0	7	0	4
>k141_463986	381	9	0	0	0	0	0	0	1	0	3	0	0	6	0	10	0	0	0	0	0	1	4	1	0	0	0	0	0	14	0	0	0	3	0	0
>k141_464809	294	0	0	0	0	0	0	0	0	0	0	0	0	0	0	0	0	0	0	0	0	0	0	0	0	0	0	0	0	0	0	0	0	9	0	0
>k141_465743	432	0	0	0	0	1	0	0	0	0	0	0	2	4	0	11	0	0	2	0	0	8	0	0	0	0	0	0	0	0	0	0	0	1	0	0
>k141_465913	1020	2	21	1	10	0	0	0	0	0	4	0	0	0	0	0	0	0	0	0	0	0	0	1	0	0	0	0	0	0	0	0	0	0	0	0
>k141_466164	477	2	2	2	0	2	0	0	0	0	2	0	0	0	0	11	0	0	0	0	1	12	0	0	0	0	0	0	0	0	4	0	0	4	0	0
>k141_466335	483	0	0	0	0	0	0	0	0	0	0	0	0	0	0	0	5	0	0	0	0	0	0	2	0	0	0	0	0	0	2	0	0	0	0	0
>k141_466515	669	1	0	0	0	1	0	1	0	1	4	3	0	0	2	2	0	4	5	12	2	2	17	4	8	17	7	5	15	1	17	3	3	0	3	0
>k141_467303	528	6	0	0	0	0	0	7	0	0	0	1	0	0	0	3	1	0	0	0	0	2	29	4	5	0	0	0	3	10	0	0	2	0	0	0
>k141_467332	336	0	0	0	0	0	0	0	0	1	0	0	0	0	0	2	0	0	0	0	0	1	0	0	0	0	0	0	0	0	0	0	0	0	0	3
>k141_468106	663	0	0	0	0	0	0	0	0	0	0	0	0	0	0	0	2	0	0	1	2	0	2	1	0	2	2	0	2	1	6	2	2	0	1	0
>k141_468344	540	1	0	0	0	0	0	0	0	0	0	0	0	0	0	0	0	0	0	0	0	3	2	4	5	0	1	0	0	0	0	0	0	0	0	0
>k141_469161	321	0	0	0	0	0	0	1	0	0	0	0	0	0	0	1	0	0	0	0	0	0	0	0	0	0	0	0	0	1	2	0	0	0	0	0
>k141_469233	321	0	0	0	4	0	0	0	2	0	0	2	0	0	0	0	0	0	0	0	0	0	0	0	0	0	0	0	0	0	0	0	0	0	0	0
>k141_469273	903	0	0	0	0	0	0	0	0	0	0	0	0	0	2	14	0	0	0	0	1	4	4	2	4	0	0	0	0	2	2	0	3	6	0	3
>k141_469378	807	2	0	0	0	0	0	0	2	0	0	0	0	3	12	17	0	0	0	0	0	0	0	0	0	0	0	0	0	0	0	0	0	10	0	0
>k141_470659	378	0	0	0	0	0	0	0	0	0	0	0	0	4	2	0	0	0	0	0	0	0	0	0	0	0	0	0	0	2	0	0	0	0	0	0
>k141_471750	393	5	0	0	0	0	0	2	0	0	0	0	0	0	0	0	0	0	0	0	0	0	0	0	0	0	0	0	0	0	0	0	0	0	0	0
>k141_471976	342	0	0	0	0	0	0	0	0	0	0	0	0	0	4	0	0	0	0	0	0	0	0	0	0	0	0	0	0	0	0	0	0	6	0	0
>k141_472445	372	4	0	0	0	0	0	1	0	0	0	0	0	0	0	0	0	0	0	0	0	0	0	0	0	0	0	0	0	0	0	0	0	2	0	0
>k141_473104	822	0	2	4	0	0	0	0	0	0	0	0	0	0	2	0	0	0	0	0	0	0	2	0	0	2	0	0	0	0	2	2	2	2	6	0
>k141_473661	522	4	0	0	0	0	0	0	0	0	0	0	0	3	11	0	0	1	0	2	0	1	0	0	0	0	0	0	0	0	0	0	0	0	0	0
>k141_473819	351	0	0	0	0	0	0	0	0	0	0	0	0	0	0	0	0	0	0	0	0	0	0	0	0	0	0	0	0	2	0	0	0	7	2	0
>k141_473836	309	0	0	0	2	0	0	0	0	0	0	0	0	0	0	1	0	0	0	0	0	0	0	0	0	0	0	0	0	0	0	0	0	0	2	0
>k141_474862	513	2	0	0	0	0	0	0	0	0	0	0	0	2	0	8	0	2	0	0	0	7	0	0	2	0	0	0	0	3	0	0	0	2	0	1
>k141_475161	357	0	0	0	0	2	0	0	0	0	0	0	0	0	0	0	0	0	0	0	0	2	0	0	0	0	0	0	0	2	0	0	0	0	0	0
>k141_477188	432	0	0	1	0	1	1	1	0	0	0	0	2	1	1	2	0	1	0	0	0	3	3	0	4	0	0	0	0	2	8	0	0	0	0	0
>k141_478136	729	1	0	0	0	2	1	0	2	2	0	0	1	6	4	14	0	0	0	0	0	6	0	0	0	0	0	0	0	0	0	0	1	14	0	2
>k141_478251	495	3	9	14	4	3	3	1	4	4	4	5	4	8	13	0	63	20	24	17	19	0	2	27	18	5	1	17	9	14	22	2	16	3	7	1
>k141_478499	435	2	0	0	2	0	0	0	0	0	0	2	0	0	0	0	0	0	0	0	0	0	0	0	0	0	0	0	0	13	0	0	8	0	0	0
>k141_478636	348	2	0	2	0	0	0	0	0	0	0	0	0	2	0	0	0	0	0	0	0	0	1	0	0	0	0	0	0	3	0	0	0	0	0	0
>k141_478901	420	0	0	0	0	0	0	0	3	0	0	0	0	0	0	0	0	0	1	0	0	0	2	0	3	0	0	2	0	0	0	0	0	0	0	0
>k141_479739	705	27	109	84	57	65	26	58	19	56	37	59	76	62	164	0	67	113	45	97	35	2	15	29	34	79	53	54	67	53	162	109	120	31	209	53
>k141_480960	408	0	0	0	0	0	0	0	0	0	0	0	0	0	0	3	0	0	0	0	0	5	4	0	2	0	0	0	0	2	0	0	3	2	0	0
>k141_481041	483	0	0	0	0	0	0	0	2	0	0	2	6	2	0	0	0	0	0	0	0	0	0	0	0	0	0	0	0	0	0	0	0	1	0	0
>k141_481098	366	3	0	0	0	0	0	0	0	0	0	0	0	0	0	3	0	1	1	0	1	3	0	0	1	0	0	0	0	0	0	0	0	0	0	0
>k141_481115	372	0	0	0	0	0	0	0	0	0	0	0	0	0	2	2	1	0	2	2	2	3	0	0	0	0	0	0	0	0	4	0	0	2	0	0
>k141_481491	570	10	0	0	0	0	0	0	0	0	0	0	0	0	0	0	0	0	0	0	0	0	0	0	0	0	0	0	0	5	0	0	0	18	0	0
>k141_481948	438	1	0	2	0	0	0	0	0	0	0	0	2	0	4	0	0	0	0	0	1	2	2	0	0	0	0	0	2	0	2	0	0	0	0	0
>k141_483039	405	0	0	0	0	0	0	0	0	0	0	0	0	0	0	6	0	0	0	0	0	6	0	0	0	0	0	0	0	0	0	0	0	0	0	0
>k141_484591	435	2	0	0	2	5	0	0	0	0	0	0	2	0	0	0	0	0	0	0	0	0	0	0	0	0	0	0	0	0	0	0	0	0	1	0
>k141_485777	474	2	2	0	0	0	0	0	0	0	2	0	0	0	5	0	0	0	0	0	2	0	0	0	2	0	0	2	2	2	0	0	2	0	1	0
>k141_486895	2895	86	0	0	12	2	6	28	26	4	32	53	4	10	9	50	12	2	15	0	1	15	64	9	23	0	0	0	2	40	10	0	27	78	6	21
>k141_487914	354	0	0	0	0	0	0	0	0	0	0	0	0	0	0	1	0	0	0	0	0	1	2	2	4	0	0	0	0	0	0	0	0	3	0	1
>k141_488215	435	0	0	0	0	0	0	0	0	0	0	0	0	0	0	2	0	0	0	0	0	4	0	0	0	0	0	0	0	0	0	0	0	0	0	0
>k141_488225	651	1	0	0	0	1	0	0	0	0	0	0	0	0	6	0	0	0	0	0	0	0	0	0	0	0	0	0	4	3	6	0	0	0	0	0
>k141_488525	651	0	0	0	0	0	0	0	0	0	0	0	0	0	0	0	0	0	2	0	1	6	0	0	2	0	0	0	1	15	3	0	5	0	0	1
>k141_489214	363	0	0	0	0	0	0	0	0	0	0	0	0	3	0	4	0	0	0	0	0	0	0	0	0	0	0	0	0	0	0	0	0	6	0	0
>k141_489321	195	0	0	0	0	0	0	0	0	0	0	0	0	0	0	0	0	0	0	0	0	2	0	0	0	0	0	0	0	0	2	0	0	0	0	0
>k141_489867	417	0	0	0	1	0	0	0	0	0	0	0	0	0	0	0	0	0	0	0	0	2	0	0	1	0	0	0	0	1	1	0	0	0	0	1
>k141_490547	234	0	0	0	0	0	0	0	0	0	0	0	0	0	0	0	0	0	0	0	0	0	0	0	1	0	0	0	2	1	0	0	0	0	0	0
>k141_490998	549	14	2	0	0	0	0	2	0	0	0	0	0	2	0	2	0	0	0	0	0	0	0	0	2	0	0	0	0	0	0	0	0	3	0	2
>k141_491159	786	1	1	0	0	0	0	0	0	0	0	0	0	0	4	3	1	0	0	0	0	5	0	0	0	0	0	0	2	0	0	0	1	5	0	0
>k141_491274	3372	158	32	7	31	0	0	22	0	0	0	8	0	2	2	15	2	2	0	0	0	0	15	2	4	0	0	0	0	45	0	0	6	133	0	5
>k141_491275	330	0	0	0	0	0	0	0	0	0	0	0	0	0	0	0	4	0	0	0	0	0	0	0	0	0	0	0	0	0	0	0	0	0	0	0
>k141_491333	549	0	0	0	0	2	0	0	0	0	2	0	0	0	0	2	0	0	0	0	0	4	0	0	0	0	0	0	0	0	0	0	0	4	2	0
>k141_491364	591	0	0	0	0	0	0	0	0	0	0	0	0	0	2	0	2	1	1	0	0	0	2	0	4	0	0	4	0	2	6	0	0	0	0	2
>k141_492667	525	2	53	11	0	4	0	0	0	10	3	5	6	4	74	0	13	46	14	64	16	0	6	5	3	31	11	6	21	17	89	46	73	41	93	16
>k141_493698	333	0	0	0	0	0	0	0	0	0	0	0	0	0	0	0	0	0	0	0	0	2	0	0	0	0	0	0	0	0	0	0	0	6	0	0
>k141_493701	3189	1	11	2	7	21	0	2	10	9	15	18	9	8	51	6	9	11	0	4	2	3	3	5	4	8	2	17	9	1	11	2	4	4	11	3
>k141_495470	339	0	0	0	2	1	0	0	4	4	5	2	0	0	7	0	0	0	0	0	0	0	0	0	0	0	0	0	0	0	0	0	0	0	0	0
>k141_495573	654	0	0	0	0	0	0	0	0	0	0	0	0	0	0	2	0	0	0	0	0	0	0	0	0	0	0	0	0	1	0	0	0	14	0	0
>k141_497590	798	0	0	0	0	0	0	0	0	0	0	2	0	0	0	0	0	0	2	0	0	0	0	0	0	0	0	0	4	0	2	3	1	3	6	0
>k141_499610	2244	15	0	4	10	8	18	6	0	0	20	27	1	10	2	22	5	7	7	0	9	20	18	16	16	0	1	4	4	9	2	4	7	42	5	4
>k141_500161	411	0	2	0	4	5	0	2	0	0	0	2	0	0	0	0	0	0	0	0	0	2	0	0	0	0	0	0	0	0	0	0	0	0	1	2
>k141_500836	357	0	0	0	0	0	0	0	1	0	2	0	0	1	0	2	0	0	0	0	0	5	1	0	1	1	0	0	0	7	1	0	1	1	0	0
>k141_501519	3924	0	0	0	0	0	0	0	0	0	0	0	0	0	0	0	2	22	6	27	18	0	42	14	14	30	84	16	46	17	61	10	28	42	5	0
>k141_502674	426	0	0	0	0	0	0	0	0	0	0	2	0	0	0	0	0	0	0	1	0	0	0	2	0	2	0	0	2	0	0	0	0	0	0	0
>k141_502701	462	0	0	0	0	2	0	4	0	0	0	0	0	0	8	0	0	0	0	0	0	0	0	0	0	0	0	0	0	0	0	0	2	6	0	0
>k141_504169	288	0	0	0	0	0	0	0	0	0	0	0	2	0	2	0	0	0	0	0	0	0	0	0	0	0	0	0	0	0	0	0	0	0	0	0
>k141_504386	1887	18	1	0	2	0	2	0	7	2	8	27	3	0	7	21	2	2	2	0	6	6	21	6	9	0	0	2	0	3	7	0	6	17	3	9
>k141_505141	381	0	0	0	0	0	0	2	0	0	1	0	0	0	1	2	0	0	0	0	0	0	1	0	0	2	2	0	2	0	2	0	0	0	0	0
>k141_505829	204	0	0	0	0	0	0	0	0	0	0	0	0	0	2	0	0	0	0	0	0	0	0	0	2	0	0	0	1	0	0	0	0	0	0	0
>k141_505874	387	0	0	0	0	0	0	0	0	0	0	0	0	6	1	1	0	0	0	0	0	5	1	0	0	0	0	0	0	4	2	0	0	0	0	0
>k141_506059	1065	4	0	0	0	0	0	0	0	0	1	1	0	0	0	5	2	1	0	0	0	7	6	1	2	0	0	0	0	2	1	0	0	9	0	9
>k141_506279	390	0	0	0	0	0	0	0	0	0	0	0	0	0	1	1	0	0	0	0	0	4	0	0	0	0	0	0	2	0	0	0	0	0	0	0
>k141_507136	366	0	0	0	0	0	0	0	0	0	0	0	0	0	0	0	0	0	0	0	0	0	4	3	0	0	0	4	0	2	0	0	0	0	0	0
>k141_508536	1101	0	0	0	0	0	0	0	0	0	0	4	0	0	0	0	2	2	0	2	2	2	0	0	4	4	0	0	9	0	0	2	0	0	1	0
>k141_508689	312	0	0	0	0	0	0	0	0	0	0	0	0	0	0	0	0	0	2	0	0	0	5	0	4	0	0	1	2	0	1	1	1	0	0	0
>k141_509262	849	10	2	0	0	0	2	2	2	0	0	0	0	0	0	0	0	0	0	0	0	0	0	0	2	0	0	0	0	0	0	0	4	0	0	2
>k141_512112	555	0	2	0	0	0	0	0	0	0	0	0	0	1	0	0	0	0	0	2	0	0	0	0	0	0	0	0	0	0	0	0	0	16	0	2
>k141_512132	1530	26	0	0	2	0	2	16	10	0	6	5	4	11	45	31	0	10	2	0	4	10	21	5	16	0	6	0	4	9	4	0	6	44	0	5
>k141_512685	1101	0	0	0	0	0	0	0	0	0	0	0	0	0	0	6	2	2	1	0	0	8	31	2	10	0	0	0	2	0	0	0	6	0	0	0
>k141_513022	234	0	0	0	0	0	0	0	0	0	0	0	0	0	2	0	0	0	0	0	0	1	0	0	1	0	0	0	0	0	0	0	0	0	0	0
>k141_513593	405	0	0	0	0	0	0	0	0	0	0	0	0	1	0	0	0	0	0	0	0	7	0	0	0	0	0	0	0	0	0	0	0	0	0	0
>k141_514241	540	0	0	0	0	0	0	0	0	0	0	0	0	0	0	8	0	0	0	0	0	15	0	0	0	0	0	0	0	0	0	0	0	0	0	0
>k141_514338	333	0	0	0	0	0	0	0	0	0	0	0	0	0	0	0	0	0	0	0	1	1	0	0	4	0	0	0	2	0	0	0	2	4	0	0
>k141_514519	696	2	0	2	0	0	0	2	0	0	2	10	0	0	0	0	0	0	0	0	2	0	2	0	0	0	0	0	0	0	0	0	0	0	0	0
>k141_515579	333	0	0	0	0	0	0	0	0	0	0	0	0	0	0	1	4	0	0	0	0	0	0	0	8	0	0	0	0	2	0	0	2	2	0	0
>k141_517096	360	0	0	0	0	0	0	0	0	0	0	0	0	0	0	3	0	0	0	0	0	4	0	0	0	0	0	0	0	0	0	0	0	0	0	0
>k141_517266	837	0	0	0	0	2	0	0	0	0	0	0	0	2	6	17	0	0	0	0	2	19	0	0	0	0	1	0	0	0	0	0	0	14	0	5
>k141_518629	414	0	0	0	0	0	0	0	2	0	0	0	0	0	0	0	0	0	2	1	0	0	2	0	0	2	0	0	6	0	0	0	0	0	0	0
>k141_518662	312	0	0	0	0	0	0	0	0	0	0	0	0	0	0	0	0	0	0	0	0	5	0	0	0	0	0	0	0	0	0	0	0	2	0	0
>k141_520444	1674	26	15	16	72	80	20	31	4	4	4	19	0	2	2	0	4	0	8	0	2	0	7	12	10	5	6	2	4	8	2	4	13	2	15	2
>k141_520703	339	0	0	0	0	0	0	0	0	0	0	0	0	0	2	3	0	0	2	2	0	4	0	0	0	0	0	0	0	0	0	0	0	0	0	0
>k141_521538	786	4	0	0	0	0	0	2	0	0	0	0	2	1	0	0	0	0	0	0	0	4	0	0	2	0	0	0	0	1	2	0	0	4	0	0
>k141_522527	450	0	0	0	0	0	0	2	0	0	0	0	0	0	0	0	2	0	2	0	2	1	0	0	0	0	0	0	0	3	0	0	1	0	0	1
>k141_522585	780	2	0	0	1	1	0	3	2	0	0	2	0	1	2	0	0	2	3	0	0	3	15	0	0	0	0	0	0	2	0	0	0	0	0	2
>k141_523005	1881	0	0	0	12	0	0	0	0	0	13	0	0	0	0	0	11	4	19	2	5	10	0	1	0	0	0	0	4	22	0	0	5	0	0	0
>k141_523157	711	0	10	0	0	0	0	0	5	3	10	16	0	2	18	0	6	6	5	2	4	0	18	3	12	6	0	1	6	43	21	0	39	2	11	3
>k141_523482	711	0	5	5	3	6	4	0	11	1	24	39	0	2	34	0	11	0	1	2	10	0	13	8	9	1	10	5	17	22	46	6	37	12	11	2
>k141_523698	411	0	0	0	0	0	0	0	0	0	0	0	0	0	0	0	0	0	2	0	2	0	0	0	3	0	2	0	0	0	0	0	0	0	0	0
>k141_524000	330	0	0	0	0	0	0	0	1	0	0	2	0	0	0	2	0	0	0	0	0	0	0	0	0	0	0	0	0	2	1	0	0	1	0	0
>k141_524697	324	0	0	0	0	0	0	1	0	0	0	0	0	2	0	0	0	0	0	0	0	0	0	0	0	0	0	0	0	3	0	0	0	0	0	0
>k141_524831	408	0	0	0	2	0	0	3	0	0	1	0	0	0	0	0	0	0	0	0	0	0	0	0	0	0	0	0	0	0	0	0	2	3	0	0
>k141_525453	2292	11	0	4	17	0	0	1	10	0	27	19	0	3	0	11	2	0	4	0	0	5	9	2	4	0	0	0	0	90	1	0	41	4	0	2
>k141_526533	441	0	0	0	0	0	0	0	0	0	0	0	0	2	4	2	0	0	0	0	0	7	0	0	0	0	0	0	0	0	0	0	0	3	0	0
>k141_526682	618	0	0	0	0	2	2	0	0	2	2	8	0	2	4	0	2	0	0	0	0	1	2	0	0	0	0	0	2	0	0	0	0	0	0	2
>k141_527419	507	0	0	0	0	0	0	0	0	0	0	0	0	0	0	0	0	0	0	0	0	0	2	0	0	0	0	0	0	0	0	0	2	0	0	0
>k141_528910	243	1	0	0	0	0	0	0	0	0	0	0	0	1	0	1	0	5	0	3	0	4	0	0	0	0	0	0	0	0	2	0	2	1	0	0
>k141_530317	288	0	0	0	0	0	0	0	0	0	0	0	0	0	0	2	0	0	0	0	0	1	0	0	0	0	0	0	0	0	0	0	0	0	0	0
>k141_530677	621	0	0	4	5	0	2	0	0	0	5	0	2	0	0	4	0	0	0	1	0	2	0	1	0	0	0	0	0	0	0	0	0	0	2	0
>k141_530968	354	0	0	0	0	0	0	0	0	0	0	0	0	0	0	1	0	0	0	0	0	0	0	0	4	0	0	0	0	0	4	0	0	0	0	1
>k141_532960	399	0	0	0	0	0	0	0	0	0	0	0	0	1	0	0	0	2	0	2	0	2	0	0	0	0	0	0	0	0	0	0	0	4	0	2
>k141_533297	1536	0	0	0	0	0	0	0	0	0	0	0	0	0	0	0	0	0	0	0	0	0	0	6	0	2	0	6	3	4	9	6	0	0	6	0
>k141_534804	448	0	0	0	0	0	0	0	0	0	0	0	0	0	0	0	0	0	0	0	0	0	8	0	0	0	0	0	0	0	0	0	0	0	0	0
>k141_534912	846	0	1	0	0	0	1	1	2	0	0	0	0	0	10	5	0	0	0	0	0	9	0	0	0	0	0	0	2	0	0	0	2	10	2	0
>k141_536316	375	1	0	2	0	0	0	0	0	0	0	0	0	0	0	0	0	0	0	0	0	0	0	0	0	0	0	0	0	0	0	0	0	3	0	0
>k141_536380	537	0	0	0	0	0	0	0	0	0	0	0	0	0	0	0	4	0	1	2	4	0	0	0	0	0	0	0	0	0	0	0	0	0	0	0
>k141_537668	1212	17	10	4	0	4	0	6	0	0	0	0	0	0	8	0	6	0	0	0	0	0	0	0	0	0	0	0	0	0	0	0	0	0	0	0
>k141_537695	366	0	6	3	5	2	0	0	6	0	16	28	0	0	12	1	6	2	5	0	8	0	11	3	12	2	6	1	13	35	49	2	47	5	9	2
>k141_538554	333	0	0	0	0	0	0	0	0	0	0	0	0	0	0	0	0	0	0	0	0	0	4	0	0	0	0	0	0	0	2	0	3	0	0	0
>k141_539102	540	2	0	0	0	0	0	0	0	0	0	0	0	4	0	4	0	0	0	0	0	0	0	0	0	0	0	0	0	8	0	0	0	0	0	0
>k141_539127	1734	0	0	0	0	0	0	0	0	0	0	0	0	0	0	0	0	0	0	0	0	0	0	0	0	0	0	0	0	0	0	0	0	64	0	2
>k141_539519	1545	1	10	2	5	8	2	3	3	9	22	15	1	3	8	9	0	11	3	16	11	14	8	4	4	8	6	9	26	10	8	6	4	7	8	2
>k141_540501	492	0	0	0	1	1	0	0	0	0	0	0	4	0	1	1	0	4	0	0	0	4	0	0	0	2	2	0	0	1	3	2	2	2	5	0
>k141_542055	336	0	0	0	0	0	0	0	0	0	0	0	0	1	2	0	0	0	0	0	0	3	0	0	0	0	0	0	0	0	0	0	0	5	0	0
>k141_542959	306	0	0	0	0	0	0	0	0	0	0	0	0	2	1	2	0	0	0	0	0	0	0	0	0	0	0	0	0	0	0	0	0	0	0	0
>k141_543544	480	0	0	0	0	0	0	0	0	0	0	0	0	0	0	0	0	0	0	0	0	0	18	0	3	0	0	0	0	0	0	0	0	0	0	0
>k141_543784	813	2	3	0	0	0	2	3	0	2	5	0	0	0	2	0	1	0	0	0	0	0	0	2	0	4	0	0	0	0	0	0	0	0	2	0
>k141_544313	357	0	0	0	0	0	0	0	0	0	0	0	0	0	2	0	0	0	0	0	0	0	0	0	0	0	0	0	0	0	0	0	0	7	0	0
>k141_544763	324	1	0	0	1	0	0	0	0	0	0	2	0	0	0	0	2	0	0	0	5	1	0	0	0	0	0	0	0	4	2	0	0	0	0	0
>k141_546996	324	0	0	0	1	0	0	0	0	0	2	0	0	2	0	0	0	0	0	0	0	2	2	0	0	0	0	0	0	0	0	0	0	0	2	0
>k141_548287	330	1	2	0	0	0	0	0	0	0	0	0	0	0	1	2	0	0	0	0	0	0	0	0	0	0	0	0	0	0	0	0	2	2	0	0
>k141_548318	612	2	2	2	3	6	0	1	2	0	0	0	0	2	0	2	0	0	0	0	0	0	1	0	0	0	0	2	0	0	1	0	0	2	0	0
>k141_548475	375	0	0	0	0	0	0	4	2	0	0	2	0	2	0	1	0	3	7	0	0	1	6	0	10	0	0	0	0	1	0	0	0	4	0	0
>k141_548684	336	0	0	0	0	0	0	0	0	0	0	0	0	0	0	9	0	0	0	0	0	0	0	0	0	0	0	0	1	0	0	0	0	0	0	0
>k141_548894	438	0	0	0	0	0	0	0	0	0	0	0	0	0	0	8	0	0	0	0	0	0	0	0	0	0	0	0	0	0	0	0	0	4	0	2
>k141_549061	516	0	0	2	0	0	0	0	0	0	0	0	0	2	0	0	0	0	2	0	0	0	0	0	0	0	0	0	0	0	2	1	0	0	0	0
>k141_549208	1008	12	4	4	12	23	0	10	0	4	0	6	4	0	0	0	0	1	0	0	2	5	10	0	9	0	0	6	0	0	2	0	0	0	2	2
>k141_550286	1220	0	0	0	0	0	0	0	0	0	0	0	0	0	0	0	0	0	0	0	0	0	0	0	0	0	0	0	0	16	6	0	42	2	0	0
>k141_550844	423	0	0	0	0	0	0	4	0	0	0	0	0	0	0	0	0	0	0	0	0	1	0	0	0	0	0	0	0	0	2	0	0	0	0	0
>k141_550912	534	0	0	0	0	0	0	0	0	0	0	0	0	0	0	0	0	1	0	0	0	0	2	0	0	0	0	2	5	0	0	0	0	0	0	0
>k141_551184	525	0	0	0	0	0	0	0	2	0	0	0	0	0	0	0	0	2	0	0	2	0	4	2	2	0	0	1	0	0	0	0	0	0	0	0
>k141_551959	480	2	0	0	4	2	0	0	4	1	0	2	0	0	1	2	0	2	0	1	0	0	2	1	0	0	2	0	1	1	2	2	3	0	2	0
>k141_552631	486	0	0	0	0	0	0	0	0	0	0	0	0	0	0	0	0	0	0	0	0	17	0	0	0	0	0	0	0	0	0	0	0	0	0	2
>k141_552787	373	0	0	0	0	0	0	0	0	0	0	0	0	0	0	0	0	2	0	2	0	0	2	0	0	0	0	0	0	0	0	0	0	2	0	0
>k141_552827	414	0	0	0	0	0	0	0	0	0	0	0	0	0	0	2	0	0	0	0	0	0	0	0	0	0	0	0	0	4	0	0	2	0	0	0
>k141_553240	405	0	0	0	0	0	0	0	0	0	0	0	0	2	1	2	2	2	0	0	0	0	0	0	0	0	0	0	0	0	2	0	0	1	0	0
>k141_553827	1683	3	13	2	2	6	0	2	2	14	12	20	0	1	27	3	2	8	4	5	5	1	3	6	0	8	6	1	17	2	30	6	13	7	24	2
>k141_554029	297	0	0	0	0	0	0	0	0	0	0	2	0	0	0	0	2	3	0	0	2	2	0	0	2	0	0	0	0	0	0	0	0	0	0	0
>k141_554121	471	2	0	0	2	0	0	0	0	0	4	0	0	0	0	0	0	0	0	0	0	0	0	3	0	0	0	0	0	0	0	0	0	0	2	0
>k141_554322	378	0	0	0	0	0	0	0	0	0	0	0	0	0	2	0	0	0	0	1	0	0	2	0	0	0	0	0	0	0	6	0	0	0	0	0
>k141_554338	393	0	0	0	0	0	0	0	0	0	0	0	0	0	0	0	0	4	0	0	0	0	0	0	0	0	0	0	0	0	2	0	0	0	0	0
>k141_554742	381	0	0	0	0	0	0	0	0	0	0	0	0	0	0	0	0	0	0	0	0	0	7	0	0	0	0	0	0	0	0	0	0	0	0	0
>k141_555093	357	0	0	0	0	0	0	0	0	0	0	0	0	0	2	4	0	0	0	0	0	1	0	0	0	0	0	0	0	0	0	0	0	0	0	0
>k141_555515	1332	6	0	0	0	0	0	4	0	0	0	0	3	21	2	30	0	0	0	0	0	29	4	0	5	0	2	2	0	99	0	0	11	27	0	6
>k141_555575	621	2	0	2	0	0	0	0	1	0	0	1	0	1	0	0	0	3	1	0	0	0	1	0	3	0	0	0	0	0	0	0	0	9	0	1
>k141_556306	447	0	0	0	0	0	0	0	0	0	0	0	0	0	0	9	0	0	0	0	2	6	0	0	0	0	0	0	0	2	0	0	0	0	0	2
>k141_556318	426	2	0	0	0	0	0	0	2	0	0	0	0	0	0	1	0	2	0	0	2	1	0	0	2	0	0	0	0	2	0	0	0	3	0	0
>k141_556439	477	2	0	0	3	0	0	0	1	0	4	2	0	0	0	0	0	0	0	0	0	2	0	0	0	0	0	0	0	4	0	0	0	0	0	0
>k141_557953	291	0	0	0	0	0	0	0	0	0	0	2	0	3	0	0	14	42	10	51	36	0	0	0	5	40	63	3	27	19	30	7	37	58	7	0
>k141_558257	480	1	0	0	0	0	0	0	1	0	0	0	0	0	1	2	0	0	0	3	0	3	2	0	2	0	0	0	0	1	2	0	0	0	0	0
>k141_558358	420	0	2	0	0	0	0	0	0	1	0	0	0	0	0	1	0	1	0	0	0	4	0	0	0	0	0	0	0	0	0	0	0	0	0	0
>k141_559716	630	8	0	0	2	0	0	2	0	0	10	0	0	0	0	2	0	0	0	0	0	0	0	0	0	0	0	0	0	2	0	0	0	0	0	0
>k141_559907	795	0	0	0	0	0	1	0	0	0	0	0	0	2	0	9	1	2	0	2	1	5	2	0	0	0	0	0	0	3	0	0	3	2	0	6
>k141_559995	333	0	0	0	0	0	0	1	0	0	0	0	0	0	0	1	0	0	2	0	0	4	1	0	0	0	0	0	0	0	4	0	2	0	0	1
>k141_560078	618	2	6	11	4	6	2	1	0	5	6	5	0	3	0	0	0	0	0	0	0	2	5	0	4	4	0	2	0	2	7	4	2	2	5	0
>k141_560311	606	0	0	0	0	0	0	0	0	0	0	4	0	0	0	0	0	0	0	2	0	0	0	4	2	0	0	0	0	0	0	0	0	0	0	0
>k141_560845	615	0	0	0	0	0	0	2	0	0	0	0	1	2	1	3	0	0	0	0	0	5	0	0	0	0	0	0	0	0	0	0	0	3	0	0
>k141_561582	441	0	0	0	0	0	0	0	0	0	0	0	0	0	0	0	0	0	0	1	4	0	2	0	1	0	0	0	2	0	0	0	0	0	0	0
>k141_561736	501	0	0	0	0	0	0	0	0	0	0	0	0	0	0	0	0	0	0	0	0	1	0	0	7	0	0	0	0	0	0	0	0	0	0	0
>k141_561830	1278	0	0	0	0	2	0	0	0	0	2	0	0	3	18	49	1	3	3	0	1	54	8	2	4	0	2	0	7	9	2	0	3	78	0	4
>k141_562029	471	0	0	0	0	0	0	0	0	1	0	0	0	0	0	2	0	9	0	6	0	0	0	0	0	0	0	0	0	0	2	0	0	0	0	0
>k141_562555	408	0	0	0	0	2	0	0	0	0	0	0	0	0	6	4	0	0	0	0	0	0	0	0	0	0	2	0	0	0	1	0	0	2	0	0
>k141_562566	1152	0	0	0	0	0	0	0	0	0	0	0	0	0	0	0	3	0	4	0	2	0	10	0	4	0	0	0	0	9	1	0	14	0	0	0
>k141_562576	498	2	0	0	0	0	0	0	0	0	0	0	0	0	0	0	0	0	0	0	0	0	6	2	4	0	0	0	0	0	0	0	2	0	0	0
>k141_562604	432	2	0	0	0	0	0	0	0	0	0	0	0	3	0	6	0	0	0	0	0	0	0	0	0	0	0	0	0	0	0	0	0	9	0	0
>k141_563088	321	0	0	0	0	0	0	0	0	0	0	0	0	0	0	5	0	0	0	0	0	4	0	0	0	0	0	0	0	0	0	0	0	0	0	0
>k141_563291	1521	11	44	10	17	38	5	11	0	27	12	8	14	9	14	6	0	1	0	0	0	3	3	0	1	1	0	0	0	3	1	0	4	0	0	4
>k141_563786	303	1	0	0	0	0	0	0	0	0	0	0	0	0	0	0	0	0	0	0	1	4	0	0	2	1	0	0	0	0	0	0	0	0	0	0
>k141_564614	777	0	0	0	0	0	0	0	0	0	0	2	0	0	0	0	0	0	14	0	0	0	0	0	4	0	0	4	0	0	0	0	0	0	4	0
>k141_564751	1749	0	0	0	0	0	0	0	0	0	0	0	0	0	0	0	8	4	7	0	3	8	20	0	19	0	4	0	2	2	10	0	2	6	2	2
>k141_564948	297	0	0	0	0	0	0	0	0	0	0	0	0	0	0	11	0	0	0	0	0	3	0	0	0	0	0	0	0	2	0	0	0	0	0	0
>k141_566415	765	0	0	0	0	2	0	0	0	0	1	0	0	2	4	5	0	0	0	0	9	6	3	0	2	0	0	0	4	5	2	0	0	17	0	2
>k141_567439	1026	2	5	0	1	0	0	1	0	0	0	0	0	10	0	6	0	0	0	0	0	0	0	0	1	0	0	0	0	6	0	0	0	31	0	1
>k141_568186	303	0	0	0	1	0	0	0	0	0	0	0	0	0	0	0	0	0	0	1	0	2	1	0	0	0	2	0	0	0	0	0	2	0	1	0
>k141_568351	546	0	0	0	0	0	0	0	0	0	0	0	0	0	0	0	0	0	0	0	5	2	0	2	0	0	0	0	2	2	1	0	3	0	0	0
>k141_568612	543	0	0	0	0	0	0	0	0	0	0	0	0	0	0	7	0	0	0	0	0	0	0	0	0	0	0	0	0	0	0	0	0	25	0	0
>k141_569310	408	0	0	0	0	0	0	0	0	0	0	0	0	0	0	0	0	0	0	0	0	4	0	0	3	0	0	0	0	0	0	0	0	0	0	0
>k141_569490	303	0	0	0	0	0	0	0	0	0	0	0	0	2	0	0	0	0	0	0	0	0	0	0	0	0	0	0	0	0	0	0	0	0	0	0
>k141_570565	678	2	0	0	2	0	0	0	2	0	2	6	0	0	2	8	0	0	2	0	0	0	0	0	0	0	0	0	0	1	0	0	0	0	0	0
>k141_571038	597	0	0	0	0	0	0	1	0	0	0	0	0	1	3	5	0	0	0	0	0	4	3	2	0	0	0	2	0	0	0	0	0	47	0	0
>k141_571985	2160	0	0	0	0	0	0	1	0	0	6	2	0	0	0	0	6	0	6	0	2	5	8	6	6	0	8	4	6	0	6	6	0	5	0	2
>k141_572045	669	0	0	3	1	0	0	0	0	0	0	0	0	0	0	0	3	2	2	0	0	0	6	4	4	0	0	0	0	13	0	0	2	0	0	0
>k141_572539	333	1	0	0	0	0	0	0	0	0	0	0	0	0	0	0	0	0	0	0	0	0	0	0	0	2	0	0	0	0	0	0	0	0	0	2
>k141_573026	297	0	0	0	0	0	0	0	0	0	0	3	0	0	2	0	0	0	0	0	0	0	0	0	0	0	0	0	0	0	2	0	0	0	0	0
>k141_573379	237	1	0	1	0	0	0	0	1	1	2	2	1	1	0	0	0	0	0	0	0	0	0	0	0	0	0	2	0	0	0	0	1	0	0	0
>k141_575083	297	0	0	0	0	0	0	0	0	0	0	0	0	0	0	8	0	2	0	0	0	1	0	0	0	0	0	0	0	0	0	0	0	0	0	0
>k141_575487	405	0	0	0	0	0	0	0	0	0	0	0	0	2	0	2	0	0	0	0	0	3	0	0	0	0	0	0	0	0	0	0	0	2	0	2
>k141_576385	840	4	0	0	0	0	0	0	0	0	0	0	0	2	12	6	0	0	0	0	0	4	0	0	0	0	0	0	0	0	0	0	0	27	0	4
>k141_577875	513	0	0	0	0	0	0	0	0	0	0	0	0	0	0	0	0	0	0	0	0	0	6	2	7	0	0	2	0	0	0	0	0	0	1	1
>k141_578238	348	0	2	0	0	0	0	1	3	0	0	0	0	3	0	0	6	2	2	7	2	0	1	0	2	5	2	3	2	15	29	6	10	1	8	0
>k141_578983	366	0	1	0	0	0	0	0	0	0	0	0	0	2	0	7	0	0	0	0	0	4	0	0	0	0	0	0	0	0	0	0	0	0	0	0
>k141_579052	408	8	0	0	0	0	0	0	0	0	0	0	0	0	0	0	0	0	0	0	0	0	1	0	0	0	0	0	0	0	0	0	0	2	0	0
>k141_580552	429	0	0	0	0	0	0	0	2	0	1	0	0	0	2	0	0	2	0	0	0	0	0	0	0	0	0	0	0	0	0	0	0	0	0	0
>k141_580832	1094	15	0	0	0	1	0	10	3	0	5	2	2	5	26	18	1	6	0	0	0	14	10	0	12	0	0	0	4	8	3	0	1	17	0	4
>k141_581892	306	0	0	0	0	0	0	0	0	0	0	0	0	0	4	4	0	0	0	0	0	0	0	0	0	0	1	0	0	0	0	0	0	0	0	0
>k141_582494	501	0	0	0	0	0	0	0	0	0	2	0	0	0	0	0	0	0	1	0	0	2	1	1	8	0	0	4	1	0	0	0	0	1	0	0
>k141_582771	804	0	0	0	1	0	0	0	0	0	0	0	0	0	0	2	5	2	4	0	2	0	2	2	8	0	0	0	2	5	0	0	6	0	0	0
>k141_582783	513	0	0	0	0	0	0	0	1	0	0	0	0	0	0	0	0	0	0	0	3	6	4	0	0	0	0	0	0	0	5	0	0	0	0	0
>k141_582824	990	0	0	0	0	0	0	0	0	0	0	0	0	0	0	0	0	4	0	0	0	7	9	4	4	0	0	0	0	4	1	0	0	0	0	0
>k141_582860	2103	3	6	1	6	15	0	0	0	8	2	1	1	0	6	1	0	6	4	7	4	1	2	0	4	6	3	15	0	9	12	10	6	4	14	0
>k141_583385	321	0	0	0	0	0	0	0	0	0	0	1	0	0	0	1	2	0	2	0	0	0	0	0	1	0	0	0	0	2	0	0	0	0	0	0
>k141_583852	330	0	0	0	0	0	0	0	2	4	0	0	0	0	0	0	2	0	0	0	0	0	0	0	0	0	0	2	0	0	0	0	0	0	0	0
>k141_584340	582	1	1	4	2	0	0	2	1	0	0	0	0	0	2	2	0	0	2	0	0	0	1	0	0	0	2	0	0	0	0	0	0	2	0	0
>k141_584532	495	1	0	0	0	0	0	0	0	0	0	0	0	0	0	0	0	0	0	0	0	0	2	4	4	0	0	0	0	0	0	0	2	0	0	0
>k141_585021	363	0	0	0	0	0	0	0	0	0	0	0	0	0	0	9	0	0	0	0	0	2	0	0	0	0	0	0	0	0	0	0	0	0	0	0
>k141_586647	471	0	0	0	0	0	0	2	2	0	0	2	0	0	2	2	0	0	0	0	0	0	4	0	0	0	0	2	2	0	0	0	2	2	0	0
>k141_587421	423	0	0	0	0	0	0	0	0	0	0	0	1	0	0	0	0	0	2	0	2	6	2	0	5	0	0	0	0	0	0	0	0	2	0	2
>k141_588010	378	0	0	0	0	0	0	0	0	0	0	0	0	0	0	0	0	0	0	0	0	0	2	3	0	0	0	2	0	0	2	0	2	0	0	0
>k141_588283	489	0	0	0	0	0	0	0	0	0	0	0	0	0	0	3	0	0	2	0	0	1	0	0	0	0	1	0	0	2	0	0	0	8	2	0
>k141_589129	339	0	0	0	0	0	0	0	0	0	0	0	0	0	0	0	0	0	0	0	0	2	0	0	0	0	0	0	0	0	0	0	0	7	0	0
>k141_589158	786	1	0	0	2	0	0	0	4	0	2	9	0	0	2	8	10	0	4	0	8	16	10	2	10	0	0	0	0	10	5	0	16	2	0	1
>k141_589615	342	0	0	0	7	0	0	0	0	0	2	0	0	0	0	0	5	0	1	0	0	0	0	0	0	0	0	0	2	1	0	0	0	0	0	0
>k141_589744	588	1	0	0	0	0	0	0	0	0	0	0	0	0	0	3	0	0	0	2	0	3	20	0	4	0	0	0	0	2	0	0	0	4	0	0
>k141_591429	360	0	0	0	0	0	0	0	0	0	0	0	0	0	0	0	0	0	0	0	0	0	0	0	0	0	0	0	0	0	0	0	0	7	0	0
>k141_592735	495	0	0	0	0	0	0	0	0	0	0	0	0	0	0	0	3	0	1	0	4	0	16	4	4	0	0	0	3	0	0	0	0	0	0	2
>k141_593724	363	2	0	0	0	0	0	2	0	0	2	2	0	0	0	1	0	0	0	0	0	1	0	0	0	0	0	0	0	0	0	0	0	7	0	0
>k141_594568	1074	2	2	0	6	0	0	0	0	0	4	10	2	2	6	0	0	0	0	0	0	0	0	0	0	0	0	0	0	2	2	8	0	0	2	2
>k141_594625	447	0	0	0	0	0	0	2	0	1	0	0	0	0	0	3	0	0	0	0	0	10	0	0	0	0	0	0	0	2	1	0	0	5	0	2
>k141_596309	414	0	0	0	0	0	0	0	0	0	0	0	0	0	0	8	0	0	0	0	0	3	0	0	0	0	0	0	0	0	0	0	0	1	0	0
>k141_596331	348	0	0	0	0	0	0	0	0	0	0	0	0	0	0	3	0	0	0	0	0	3	0	0	0	0	0	0	0	0	0	0	0	2	2	0
>k141_598507	660	1	0	0	0	0	0	0	0	0	3	0	0	0	0	2	4	0	0	1	1	4	6	0	2	0	0	0	0	3	0	0	0	2	0	0
>k141_598565	641	0	0	0	0	0	0	0	0	0	0	0	0	0	0	0	0	0	0	0	0	0	0	0	0	0	0	0	2	0	0	6	0	2	7	2
>k141_599031	543	0	0	0	0	0	0	0	0	0	0	0	0	0	0	0	0	1	0	0	0	3	0	3	1	0	2	0	0	3	0	0	3	3	0	0
>k141_599717	876	0	0	0	0	0	0	0	0	0	0	0	0	0	0	2	0	1	3	0	0	0	2	0	0	0	4	0	1	2	2	0	0	9	0	0
>k141_600419	303	4	0	0	0	0	0	0	0	0	0	0	0	0	0	0	0	0	0	0	0	0	0	0	0	0	0	0	0	0	0	0	0	3	0	0
>k141_602345	486	0	0	0	0	0	2	0	0	0	0	0	0	0	9	0	0	2	0	0	0	0	0	0	0	0	0	0	1	0	0	0	3	2	0	0
>k141_602371	501	0	0	0	0	0	0	1	0	0	0	0	0	2	0	0	0	0	0	0	0	0	0	2	4	0	2	0	2	1	4	0	0	8	0	4
>k141_602403	558	0	0	0	0	0	0	0	0	0	0	0	0	2	0	0	0	0	0	2	0	0	0	2	0	0	0	0	0	0	0	0	0	0	0	0
>k141_603771	342	0	0	0	0	0	0	0	0	0	0	0	0	0	0	3	0	0	0	0	0	2	0	0	0	0	0	0	0	0	0	0	0	1	0	0
>k141_604434	309	0	0	0	0	0	0	0	0	0	0	0	0	1	0	0	0	0	0	0	0	4	0	0	0	0	0	0	2	3	0	0	0	0	0	0
>k141_604635	492	2	0	0	0	0	0	0	0	0	3	2	0	0	3	4	2	0	0	0	0	0	6	0	0	0	0	0	0	4	0	0	0	2	0	2
>k141_605407	1338	0	0	0	0	0	0	0	0	0	2	0	0	0	0	0	0	2	16	0	34	0	2	2	0	0	0	0	0	0	0	0	0	0	0	0
>k141_605826	801	0	0	0	0	0	0	2	0	0	0	0	5	1	0	0	6	0	6	0	0	0	2	0	2	0	0	0	0	0	0	2	0	0	0	0
>k141_606438	582	0	0	0	0	0	0	0	0	0	0	0	0	0	0	0	0	2	0	0	2	1	7	0	2	0	0	0	0	0	0	0	0	0	2	0
>k141_607138	279	0	0	0	0	0	0	0	0	0	0	0	0	0	0	2	0	0	0	0	0	0	0	0	0	0	0	0	0	0	0	0	0	0	0	0
>k141_608281	654	0	1	0	4	6	2	0	0	0	0	2	1	4	6	0	0	1	0	0	0	0	0	2	2	2	1	1	4	0	2	0	0	2	4	0
>k141_608999	357	0	0	0	0	0	0	1	0	0	0	0	0	0	0	0	0	0	0	0	0	2	2	0	0	0	0	0	0	0	0	0	0	2	1	2
>k141_610374	441	0	0	0	0	0	0	2	2	0	0	0	0	0	0	0	0	0	0	0	0	0	3	2	2	0	0	2	0	0	0	0	0	0	0	0
>k141_610549	405	0	0	0	0	0	0	0	0	0	0	0	0	0	0	0	0	2	0	0	0	0	0	0	0	0	0	1	0	2	2	4	0	0	0	0
>k141_615396	267	0	0	0	0	0	0	0	0	0	0	3	0	0	0	0	0	0	1	0	0	0	0	0	0	0	0	0	0	0	0	0	0	0	0	2
>k141_616265	1803	20	2	2	8	5	0	6	2	3	8	10	6	15	4	41	20	12	9	6	11	41	109	19	55	0	3	4	13	23	19	0	50	4	3	1
>k141_617583	474	1	0	0	0	0	0	0	0	0	2	0	2	0	0	0	0	2	2	0	0	0	0	0	0	0	0	0	0	1	0	0	0	0	0	0
>k141_618117	372	2	0	0	0	0	0	0	0	0	0	0	0	0	0	0	0	0	0	0	0	0	0	0	0	0	0	0	0	0	0	0	0	2	0	0
>k141_618258	1902	0	0	0	0	0	0	0	0	0	0	6	0	0	0	0	58	20	2	2	19	0	0	0	2	0	0	4	1	0	2	0	4	0	0	0
>k141_620331	252	0	0	0	0	0	2	2	0	0	0	0	0	0	0	0	0	0	0	0	0	0	2	0	0	0	0	0	0	2	0	0	0	0	0	0
>k141_621678	252	0	0	0	0	0	0	0	0	0	0	0	0	0	0	0	0	0	2	0	0	0	0	0	0	0	0	3	0	0	1	0	0	0	0	0
>k141_622208	2058	22	0	2	1	1	0	3	0	0	2	2	1	1	2	11	7	7	4	0	0	16	109	9	49	1	0	0	1	27	7	0	31	3	0	0
>k141_623075	450	2	0	2	0	0	0	5	0	0	0	2	0	0	0	0	0	0	0	0	0	0	0	0	0	0	0	0	0	0	0	0	0	0	0	0
>k141_623926	429	0	0	0	0	0	0	2	0	0	0	2	0	0	0	0	0	0	0	0	0	0	0	0	0	0	0	0	0	0	0	2	2	0	0	0
>k141_624118	873	2	0	0	1	0	0	0	0	0	0	0	0	0	0	4	0	2	0	2	2	4	1	0	4	0	0	2	1	3	2	0	0	3	0	1
>k141_624310	1095	7	14	2	12	16	2	20	0	2	0	1	6	2	0	0	1	3	0	2	2	0	5	2	9	4	0	8	2	2	0	1	0	0	4	0
>k141_625246	432	0	0	0	0	0	0	0	0	0	0	0	0	0	0	0	2	0	0	0	0	4	6	0	0	0	0	0	0	0	0	0	0	0	0	0
>k141_626692	321	0	0	0	0	0	0	0	0	0	0	0	0	1	0	3	0	0	0	0	0	2	0	0	0	0	0	0	2	0	0	0	0	0	0	0
>k141_627493	702	0	0	0	2	0	0	1	0	0	0	0	0	0	0	1	2	0	0	2	4	6	2	2	5	0	0	0	0	4	1	0	6	0	0	0
>k141_627602	603	0	0	0	0	0	0	0	0	0	0	0	0	1	10	0	3	0	0	0	0	0	2	0	0	0	0	0	0	0	0	0	0	0	0	0
>k141_627623	369	0	0	0	0	0	0	0	0	0	0	2	0	0	0	4	1	1	2	0	0	0	0	0	0	0	0	0	0	0	0	0	2	0	0	0
>k141_628096	195	2	0	0	0	0	0	0	0	0	1	0	0	0	1	4	0	0	0	0	0	0	0	0	0	0	0	0	0	0	0	0	0	2	0	2
>k141_628797	285	0	0	1	0	0	0	0	0	0	2	2	0	0	0	1	0	0	0	0	0	2	1	0	2	0	0	0	0	0	0	0	0	0	1	0
>k141_628807	297	0	0	0	0	0	0	0	0	0	0	0	0	0	0	2	0	0	0	0	0	0	0	0	0	0	0	0	0	0	0	0	0	4	0	0
>k141_629983	3345	0	0	0	0	0	0	0	0	0	0	0	0	4	2	164	32	36	12	4	0	199	88	0	10	0	0	0	0	0	0	0	0	0	0	2
>k141_630311	360	1	1	0	1	5	0	0	0	0	2	0	0	0	0	0	1	0	0	0	0	0	0	0	0	0	0	0	0	0	0	0	0	0	2	0
>k141_631574	441	0	4	0	4	12	2	0	0	4	0	0	2	2	0	0	0	0	0	2	0	1	0	2	0	11	0	2	0	0	1	1	4	2	4	3
>k141_632273	390	0	0	0	0	0	0	0	0	0	0	4	0	0	0	0	0	0	0	0	0	0	4	1	2	0	0	0	0	0	0	0	0	0	0	0
>k141_632375	2154	7	12	0	3	19	4	10	0	4	0	6	2	7	7	3	4	15	0	18	3	3	4	16	0	14	6	20	6	10	21	4	7	3	18	2
>k141_633550	204	0	0	0	0	0	0	0	0	0	0	0	0	0	1	0	0	0	0	0	0	0	0	0	0	0	0	0	0	0	0	0	0	1	0	1
>k141_634203	420	6	38	3	11	4	0	0	4	1	5	10	2	4	49	0	41	51	27	35	36	0	6	17	23	18	21	36	41	47	105	23	52	25	36	1
>k141_635277	753	0	0	0	0	0	0	0	1	0	0	0	0	0	0	0	4	0	2	0	0	8	2	2	8	0	2	0	0	2	6	0	2	0	0	0
>k141_635484	318	0	0	0	0	0	0	0	2	0	0	0	0	0	0	7	0	0	0	0	0	0	0	0	0	0	0	0	0	0	0	0	0	0	0	1
>k141_635539	750	2	0	0	0	0	0	1	0	0	0	0	0	4	0	11	1	0	2	0	3	18	2	0	0	0	0	0	2	0	1	0	0	3	0	2
>k141_635809	576	2	0	0	0	2	0	0	1	0	0	0	1	1	1	4	0	0	5	1	0	1	27	0	14	0	0	1	3	1	0	0	1	0	0	0
>k141_636504	501	0	0	0	0	0	0	0	0	0	0	0	0	0	2	4	0	0	0	0	4	1	0	0	0	0	2	0	0	0	0	0	0	2	0	0
>k141_637145	900	4	0	2	2	2	0	0	4	0	12	20	0	0	0	0	0	0	2	0	0	0	7	3	0	0	0	0	0	2	0	0	0	0	0	0
>k141_637416	375	0	0	0	0	0	0	0	0	0	0	0	0	0	0	2	0	0	0	0	0	0	0	0	0	3	2	2	2	0	0	0	0	0	2	0
>k141_637868	309	1	2	0	0	2	0	0	0	0	0	1	0	0	0	0	0	0	0	0	0	0	0	0	0	0	0	0	0	0	0	0	0	0	0	0
>k141_638390	330	0	0	0	2	0	0	0	0	0	0	0	0	0	0	4	0	2	2	0	0	4	0	0	0	0	0	0	0	1	0	0	0	2	0	2
>k141_638755	474	3	2	1	2	2	3	0	0	0	2	0	0	1	0	2	0	2	0	2	0	0	6	2	0	0	1	0	0	4	0	4	0	5	0	0
>k141_640131	336	2	3	0	0	0	0	0	0	0	0	0	0	0	2	1	0	0	1	0	1	0	0	0	0	0	0	0	0	0	0	0	0	22	0	0
>k141_640580	522	0	0	0	0	2	0	4	0	0	0	0	0	4	0	0	0	0	0	0	0	0	1	0	0	0	0	0	2	0	0	0	0	0	0	2
>k141_641120	357	0	0	4	0	0	0	0	0	0	0	0	0	0	0	3	0	0	0	0	0	0	2	0	1	0	0	0	0	0	0	0	0	5	0	0
>k141_641874	318	0	0	0	0	0	0	0	0	0	0	0	0	0	0	0	0	0	0	0	0	2	0	0	0	0	0	0	0	0	2	0	0	1	0	2
>k141_642364	315	0	0	0	0	0	0	0	0	0	0	0	0	0	0	0	0	0	0	0	0	5	0	0	0	0	0	0	0	0	1	0	0	0	0	0
>k141_642687	345	4	0	2	0	0	0	0	0	0	0	0	0	0	0	2	2	0	0	0	0	1	0	0	0	0	0	0	0	2	0	0	0	0	0	0
>k141_643052	246	0	0	0	0	0	1	5	1	0	2	0	0	0	0	0	0	1	2	0	0	0	0	0	0	0	0	0	0	2	0	0	0	0	0	0
>k141_643358	864	2	0	0	0	2	0	0	0	0	2	2	0	0	2	1	1	2	0	2	2	3	5	2	6	4	0	2	7	2	0	0	0	0	1	1
>k141_644267	843	0	2	0	2	0	0	0	4	0	2	0	0	1	0	0	1	1	3	0	2	8	2	2	3	0	0	0	0	16	2	0	20	1	0	3
>k141_645482	366	1	0	0	0	0	0	0	1	0	0	2	0	2	0	0	0	0	0	0	1	0	0	0	0	0	0	0	0	0	0	0	0	2	0	2
>k141_645558	309	0	0	0	0	0	0	0	0	0	0	0	0	0	0	0	0	0	0	0	0	2	0	0	0	0	0	0	0	2	0	0	0	2	0	0
>k141_645766	804	1	3	2	8	8	2	2	0	6	0	2	2	0	0	0	0	5	0	0	0	1	0	1	0	4	1	0	2	1	0	1	0	0	1	0
>k141_646512	1170	33	0	0	4	1	2	25	14	0	16	6	0	3	11	13	0	0	4	0	0	4	3	0	12	0	0	0	1	9	3	0	6	22	0	10
>k141_648639	198	0	0	0	0	0	0	0	2	0	0	0	0	0	1	0	0	0	0	0	0	0	0	0	0	0	0	0	0	0	0	0	0	0	0	0
>k141_648738	369	1	0	0	0	0	0	0	0	0	0	0	0	0	0	2	0	0	4	0	0	4	2	0	2	0	0	0	0	0	0	0	5	0	0	0
>k141_648756	1491	1	0	0	0	1	0	4	3	2	5	8	0	5	4	28	2	7	2	2	6	32	19	2	11	0	6	0	6	2	1	0	0	9	0	9
>k141_649099	402	4	0	0	0	0	0	0	0	0	0	0	0	2	4	18	0	0	0	0	0	0	0	0	0	0	1	0	1	0	0	0	0	14	0	1
>k141_649547	1155	8	0	1	7	0	0	2	2	0	8	2	0	3	0	9	2	4	0	0	2	12	12	2	4	0	0	2	0	0	2	0	4	0	0	3
>k141_651090	2667	4	3	0	0	0	0	0	0	0	0	0	0	7	5	30	2	2	5	0	0	14	22	7	6	0	0	4	2	21	0	0	2	108	0	4
>k141_651225	528	2	0	0	0	0	0	2	0	0	0	0	0	0	0	0	0	0	0	0	0	0	0	0	0	0	0	0	0	0	0	0	0	19	0	0
>k141_652254	1014	1	0	0	0	0	0	0	1	2	4	7	0	0	2	0	4	4	13	5	13	3	33	10	6	12	0	12	3	5	7	3	11	1	2	1
>k141_652998	498	3	0	0	2	0	0	0	0	0	0	0	0	0	0	11	0	0	0	0	0	4	0	0	0	0	0	0	0	2	0	0	0	4	0	2
>k141_653209	327	0	0	0	0	0	0	0	0	0	3	0	0	0	0	0	0	0	2	0	0	0	0	0	0	0	0	0	0	0	0	0	0	0	0	0
>k141_653408	834	0	0	0	0	0	0	0	0	0	0	0	0	4	3	12	0	0	0	0	0	3	0	0	0	0	2	0	0	0	0	0	0	39	0	0
>k141_654025	471	0	0	0	0	0	0	0	0	0	0	0	0	0	1	6	0	2	0	0	0	6	0	0	1	0	0	0	0	0	0	0	0	5	0	2
>k141_654714	501	2	0	0	4	0	0	0	0	0	0	1	0	0	0	2	0	0	0	0	0	11	0	0	0	0	0	0	0	1	0	0	2	5	2	3
>k141_656635	783	0	3	0	0	0	0	0	0	2	0	0	0	0	0	1	3	1	0	6	0	1	3	3	4	6	8	6	7	7	9	4	11	7	1	0
>k141_657715	312	0	0	0	0	0	0	0	0	0	0	0	0	0	0	1	0	0	0	0	0	0	3	0	0	0	0	0	0	1	0	0	0	2	0	0
>k141_658691	1173	55	451	127	161	229	64	114	181	205	311	339	203	298	1296	6	926	764	506	664	643	10	112	259	364	502	622	449	807	694	1077	334	814	784	547	162
>k141_659055	516	2	0	0	0	0	0	0	0	0	0	0	0	0	2	2	2	0	0	0	0	0	3	0	0	0	1	0	0	0	2	0	2	0	1	0
>k141_659345	390	4	0	0	0	0	0	0	0	0	0	0	0	0	0	0	0	0	0	0	0	0	0	0	0	0	0	0	0	1	0	0	0	5	0	0
>k141_659362	426	0	0	0	0	0	0	0	0	0	0	0	1	2	14	0	0	0	0	0	1	1	0	0	0	0	2	0	0	0	0	0	0	7	0	1
>k141_660681	402	1	0	0	0	0	0	0	0	0	0	0	0	0	0	2	0	4	0	0	2	0	0	0	0	1	0	0	0	0	0	0	1	0	0	0
>k141_661124	345	0	0	0	0	0	0	0	0	0	0	0	0	0	0	10	0	0	0	0	0	0	0	0	0	0	0	0	0	0	0	0	0	0	0	0
>k141_661214	327	0	0	0	1	0	2	0	0	0	0	0	0	0	0	0	0	0	0	2	0	0	0	0	0	2	0	0	0	0	0	0	0	0	2	0
>k141_661242	390	0	0	0	0	0	0	0	0	0	0	0	0	0	0	3	0	0	0	0	0	3	0	2	0	0	0	0	0	2	0	0	0	0	0	0
>k141_662120	357	0	0	0	0	0	0	0	0	0	0	0	0	0	0	0	0	0	0	0	0	1	0	0	0	0	0	0	0	0	0	0	0	2	0	0
>k141_662247	507	2	0	0	0	0	0	2	0	0	2	3	0	1	5	7	0	2	0	0	0	4	2	0	2	0	0	4	2	3	0	0	1	6	0	1
>k141_662660	414	2	0	0	0	0	0	0	0	0	0	0	0	0	1	4	0	0	0	0	1	2	2	0	4	0	0	0	3	0	1	0	4	1	0	1
>k141_663005	483	6	0	0	0	0	0	2	0	2	0	0	1	2	4	1	6	2	0	0	0	6	2	0	3	0	0	0	0	0	1	0	0	0	0	0
>k141_663475	360	0	0	0	2	0	0	2	0	0	1	2	0	0	1	0	0	0	0	0	0	0	0	0	0	0	0	0	0	0	0	0	0	0	0	0
>k141_664241	369	0	0	0	0	0	0	0	0	0	1	0	0	1	0	7	0	0	0	0	0	3	0	0	0	0	0	0	0	0	0	0	2	0	2	1
>k141_665152	330	0	0	0	0	0	0	0	0	1	0	2	0	2	0	0	0	0	2	0	0	0	0	0	0	0	0	0	0	0	0	0	0	0	0	0
>k141_665356	681	2	2	0	0	0	0	0	0	0	0	0	0	0	4	7	0	0	0	0	3	4	0	0	2	0	0	0	0	2	0	0	6	9	0	2
>k141_666074	396	0	0	0	0	0	0	0	0	0	0	0	0	2	2	0	0	0	0	0	0	0	0	0	0	0	0	0	0	0	0	0	0	10	0	0
>k141_666296	708	2	0	0	0	0	0	0	0	0	0	0	0	4	0	14	0	0	0	0	0	1	0	0	0	0	0	0	0	7	0	0	0	54	0	0
>k141_666750	318	2	1	0	6	14	3	8	0	0	4	0	0	0	0	0	0	0	0	0	0	0	0	3	2	2	0	0	0	1	0	0	2	0	3	0
>k141_666964	327	0	0	0	0	0	0	0	0	0	2	1	0	0	0	0	0	0	0	0	0	0	2	0	0	0	0	0	0	0	0	0	0	0	0	0
>k141_667429	387	0	0	0	0	0	0	0	0	0	0	0	0	4	6	2	0	0	0	0	0	2	0	0	0	0	0	0	0	0	0	0	0	2	0	0
>k141_668471	366	0	0	0	0	0	0	0	0	2	0	0	0	0	0	0	0	0	0	2	0	0	0	0	0	0	0	0	0	0	2	0	0	0	2	0
>k141_669312	486	0	0	0	0	0	0	0	0	0	0	0	0	0	6	3	0	0	0	0	0	6	0	0	0	0	0	0	0	0	0	0	0	1	0	2
>k141_670314	399	0	0	0	0	0	0	0	0	0	0	0	0	0	0	0	0	0	0	0	0	0	0	0	0	0	0	0	0	0	0	0	1	8	0	0
>k141_670452	711	0	0	2	0	0	0	0	0	0	2	4	0	0	0	3	1	0	0	0	0	2	4	2	2	0	0	0	0	0	0	0	2	2	0	0
>k141_670582	183	56	86	118	111	136	47	127	43	77	63	84	151	136	88	0	6	21	18	30	2	0	8	16	10	10	4	4	8	2	13	5	12	2	57	30
>k141_670589	495	0	0	0	0	0	0	0	0	0	0	2	2	0	2	3	0	0	0	0	2	0	1	0	0	0	0	2	2	0	4	2	4	0	0	0
>k141_671119	408	0	0	0	0	0	0	0	0	0	0	0	0	0	0	0	0	0	2	0	0	4	0	0	2	0	0	0	0	2	0	0	0	7	0	1
>k141_671206	372	1	0	0	2	2	0	0	0	0	0	0	0	0	0	8	0	0	0	0	0	4	0	0	0	0	0	0	0	0	0	0	0	1	0	0
>k141_671250	504	0	0	0	0	0	0	0	0	0	0	2	0	0	0	2	0	0	0	0	1	5	8	0	5	0	0	1	1	2	2	0	9	2	0	0
>k141_671344	447	0	0	0	0	0	0	0	0	0	0	0	0	0	0	0	0	0	0	0	0	0	0	0	0	0	0	0	4	0	0	2	0	0	0	0
>k141_671469	681	18	108	22	7	17	1	19	8	24	24	86	31	19	233	0	54	171	42	268	80	5	19	13	29	135	86	45	126	72	239	100	178	73	207	56
>k141_672207	258	0	0	0	0	0	0	1	0	0	2	0	0	0	0	0	0	0	2	0	0	0	0	0	0	0	0	0	1	0	0	0	0	2	0	0
>k141_672382	483	0	0	0	0	0	0	0	0	0	0	0	0	0	0	1	0	0	0	0	0	9	2	2	0	0	0	0	0	0	0	1	0	0	1	0
>k141_672400	393	0	0	0	0	0	0	0	0	0	0	0	0	0	0	9	0	0	0	0	0	2	0	0	0	0	0	0	0	0	0	0	0	0	0	2
>k141_672542	294	0	0	0	0	0	0	0	0	0	0	0	0	0	0	0	0	0	0	0	0	2	0	0	0	0	0	0	0	0	0	0	4	0	0	0
>k141_673322	345	0	0	0	0	0	0	0	0	0	0	0	0	0	0	1	0	0	0	0	0	4	0	0	0	0	0	0	0	0	0	0	0	6	0	2
>k141_673371	399	0	0	0	0	0	0	0	0	0	0	4	0	0	0	0	0	0	0	0	0	2	0	0	2	0	0	0	0	0	0	0	0	3	0	0
>k141_673729	696	0	0	0	0	0	0	0	0	0	2	0	0	0	2	0	2	0	0	0	0	0	4	0	0	0	2	0	2	2	0	0	8	2	0	0
>k141_674234	369	0	0	0	1	0	0	1	0	0	0	0	0	0	0	2	0	0	0	0	0	2	0	0	1	0	0	0	1	1	1	0	0	0	1	2
>k141_674528	1182	0	3	0	2	4	0	0	0	6	12	5	0	2	4	0	2	2	0	0	0	0	0	2	3	3	5	0	8	0	0	2	0	2	14	0
>k141_674750	366	2	0	0	0	0	0	0	0	0	0	0	0	0	0	2	0	0	0	2	0	0	0	0	0	0	0	0	0	0	0	0	1	1	0	2
>k141_674953	528	0	0	0	0	0	0	0	0	0	0	0	0	0	6	0	0	2	0	0	0	1	0	0	0	0	0	0	0	0	0	0	0	6	0	0
>k141_675427	2975	19	0	0	5	1	0	2	3	0	12	9	1	18	28	193	2	14	9	0	8	186	38	8	32	0	0	3	17	36	7	3	13	261	6	37
>k141_676027	423	3	0	0	0	0	0	0	0	0	0	0	0	0	3	0	0	0	0	0	0	2	0	0	1	0	2	0	0	0	0	0	3	6	0	0
>k141_676087	654	0	0	0	0	0	0	0	0	0	0	0	1	0	1	2	2	2	0	0	0	3	10	2	6	0	0	0	2	2	0	0	2	5	0	2
>k141_676376	303	0	0	0	0	0	0	0	0	0	0	0	0	0	1	0	0	0	2	0	0	2	1	0	0	0	0	0	0	2	0	0	0	0	0	0
>k141_676773	516	0	0	0	0	0	0	0	0	0	0	0	0	0	0	4	4	0	2	0	0	4	0	0	0	0	0	0	0	0	0	0	0	0	0	0
>k141_677360	780	2	0	0	0	0	0	0	5	0	0	5	2	0	0	2	6	0	7	0	0	4	8	0	3	1	2	2	0	4	5	0	5	0	0	0
>k141_677577	699	0	0	0	1	0	0	0	0	2	3	1	0	0	0	4	0	2	0	7	0	7	0	4	4	8	6	4	11	1	6	2	5	0	0	0
>k141_678235	717	2	0	0	1	2	0	0	4	4	2	6	0	0	0	0	0	0	0	0	0	2	0	2	3	0	0	0	0	0	2	0	0	0	1	4
>k141_678880	327	0	0	0	0	0	0	0	0	0	0	0	0	0	0	0	0	0	0	0	0	0	0	1	1	0	0	0	0	0	0	0	2	0	0	0
>k141_679009	351	0	2	0	6	2	0	0	0	0	0	0	0	0	2	0	0	0	0	0	0	0	0	1	0	0	1	0	0	0	0	0	2	0	2	0
>k141_679116	807	3	0	0	0	0	0	0	0	0	1	0	0	0	0	2	0	0	0	0	0	0	0	0	0	0	0	0	0	0	0	0	1	31	0	0
>k141_679422	4194	20	4	7	10	32	8	26	5	5	8	30	5	9	23	10	5	7	26	0	8	14	20	11	39	38	20	27	35	9	57	22	16	2	43	3
>k141_680081	477	0	0	0	0	0	0	0	0	0	0	0	0	1	2	0	0	0	0	0	4	8	4	2	0	0	0	0	0	0	0	0	3	0	0	0
>k141_680714	357	0	0	0	0	0	0	0	0	0	0	0	0	0	0	2	2	0	0	0	0	3	0	0	0	0	0	0	0	0	0	0	0	3	0	2
>k141_681682	657	8	5	3	0	3	0	0	0	0	0	0	0	0	9	13	1	3	2	2	4	28	12	2	10	1	1	4	5	3	5	1	6	12	5	4
>k141_683179	702	2	0	0	1	3	0	1	0	0	3	0	0	3	2	6	2	0	4	0	1	19	3	2	4	0	0	2	0	3	4	1	0	9	0	1
>k141_683690	540	0	0	0	0	0	0	0	0	0	0	0	0	0	0	0	0	1	0	2	0	0	0	4	1	2	0	0	3	2	2	0	2	2	1	2
>k141_684031	486	0	0	0	0	0	0	0	0	0	0	0	4	0	0	1	6	1	0	1	1	8	2	0	0	0	0	0	0	0	0	0	0	4	0	2
>k141_684177	582	0	0	0	0	0	0	0	0	0	1	0	0	2	0	1	0	0	0	0	0	1	0	0	2	0	0	0	2	0	0	0	0	0	0	0
>k141_684190	387	0	0	0	0	0	0	0	0	0	4	0	0	0	0	0	0	0	0	0	0	0	0	0	0	0	0	0	0	0	2	0	2	0	3	0
>k141_686732	456	0	0	0	0	0	0	0	0	0	0	0	0	2	10	0	0	0	0	0	0	0	0	0	0	0	0	0	0	0	0	0	0	0	0	0
>k141_686818	363	1	0	0	0	0	0	0	0	0	0	3	0	0	0	0	1	0	3	0	0	0	0	0	1	0	0	0	0	0	2	0	4	0	0	0
>k141_687386	837	6	0	0	4	0	0	0	0	0	8	2	0	4	0	0	0	0	0	0	0	0	0	0	0	0	0	0	0	4	0	0	1	0	0	0
>k141_688800	408	1	0	0	0	2	0	1	1	0	1	0	0	2	3	7	0	0	0	0	2	1	0	0	0	0	0	0	0	0	2	0	0	2	0	0
>k141_689159	174	0	0	0	0	0	0	0	0	0	0	0	1	0	0	0	0	0	1	0	0	0	0	0	0	0	0	0	0	0	0	0	0	0	1	0
>k141_691150	471	0	0	0	2	0	0	2	0	0	0	0	0	0	0	2	1	0	0	0	0	2	0	0	0	0	0	0	0	2	0	0	0	0	0	0
>k141_691451	387	3	0	0	0	0	0	0	0	0	0	0	0	0	0	0	0	0	0	0	0	1	0	0	0	0	0	0	0	0	0	0	0	0	0	2
>k141_691830	510	0	0	0	0	0	0	0	0	4	0	2	0	0	1	2	0	4	0	0	0	2	0	0	0	0	0	0	0	0	1	0	0	0	0	1
>k141_692315	465	0	0	0	0	0	0	0	0	0	0	0	2	2	0	6	1	0	0	0	2	3	5	0	1	0	0	0	0	4	0	0	1	1	0	2
>k141_692922	336	0	0	0	2	0	0	0	0	0	0	0	1	0	0	0	0	0	0	0	0	0	0	0	0	1	0	0	0	0	1	0	0	0	2	0
>k141_693143	360	0	0	0	0	0	0	0	0	0	0	2	0	0	0	0	2	1	0	0	0	0	26	0	0	0	0	0	2	0	0	0	0	2	0	0
>k141_693281	1428	141	1	2	12	0	0	19	0	0	0	0	0	0	0	0	0	0	0	0	0	0	0	0	0	0	0	0	0	0	0	0	0	0	0	0
>k141_694703	849	3	0	0	2	0	0	0	4	0	3	2	0	0	0	2	0	0	0	0	0	3	4	0	4	0	0	0	2	0	2	0	0	0	0	0
>k141_697557	948	1	0	0	0	0	0	0	0	0	2	0	0	0	0	33	0	0	0	0	0	3	0	0	1	0	0	0	0	0	0	0	0	2	0	0
>k141_697904	993	0	0	0	2	0	0	0	2	2	11	10	0	0	6	0	4	0	2	0	0	0	4	2	2	0	0	0	0	0	0	4	0	2	1	0
>k141_697965	333	0	0	0	0	0	0	0	0	0	0	0	0	0	3	0	2	0	0	0	0	0	3	0	0	2	0	0	0	0	1	0	2	0	5	0
>k141_698583	870	0	0	2	0	0	0	0	0	0	2	2	0	0	0	1	0	0	0	0	0	2	0	0	0	0	0	0	0	1	13	0	2	0	1	1
>k141_699110	909	0	0	0	0	0	0	0	0	0	0	0	0	4	10	1	0	0	0	0	0	0	0	0	0	0	0	0	0	0	0	0	0	3	0	0
>k141_699249	252	0	0	0	0	0	0	0	0	0	0	0	0	0	0	3	0	2	0	0	0	5	0	0	0	2	0	0	0	0	0	0	1	0	0	0
>k141_699346	423	0	0	0	0	0	0	0	0	0	0	0	0	1	4	7	0	0	0	0	0	0	0	0	0	0	0	0	0	0	0	0	0	4	0	0
>k141_699376	474	0	0	0	2	0	0	2	0	0	0	0	0	0	2	2	0	0	0	0	0	2	2	0	2	0	0	0	0	0	0	0	2	4	0	0
>k141_699783	591	11	0	0	6	0	0	5	0	0	2	0	0	2	0	6	3	0	1	0	0	22	4	0	6	0	1	0	0	13	0	0	8	7	0	4
>k141_701065	1035	2	0	0	0	0	0	0	1	0	0	1	0	0	0	4	2	1	5	0	3	18	4	3	0	0	0	0	4	18	3	0	8	0	0	2
>k141_701152	1611	11	0	0	4	0	0	0	2	0	3	1	0	19	2	22	0	6	0	0	0	31	0	2	1	0	0	0	0	19	0	0	2	11	0	2
>k141_701533	588	34	0	1	7	0	0	13	1	0	1	0	0	0	0	4	0	2	0	0	0	12	4	0	4	0	0	0	0	13	0	0	4	2	0	2
>k141_701570	690	5	4	0	0	4	0	1	0	4	2	1	2	1	0	8	0	2	2	0	2	3	1	0	1	0	0	0	0	1	3	0	4	4	0	0
>k141_702269	780	0	0	0	0	0	0	0	0	0	0	0	0	0	0	0	0	2	0	0	0	3	7	4	6	0	0	0	0	0	4	0	6	2	0	0
>k141_705324	888	2	2	8	0	17	0	6	0	4	0	2	0	2	0	0	0	0	0	0	0	2	0	0	0	2	0	0	0	0	3	2	1	2	1	2
>k141_705545	570	0	6	6	0	0	0	0	0	0	0	2	0	0	1	0	0	0	0	0	0	0	0	0	0	0	0	1	0	0	6	0	0	0	0	0
>k141_705906	336	0	0	0	0	0	0	0	0	0	0	1	0	2	0	1	0	0	1	1	2	2	0	1	1	0	0	0	0	3	0	0	0	0	0	0
>k141_706227	324	0	0	0	0	0	0	0	0	0	0	0	0	6	0	7	0	0	0	0	0	0	0	0	0	0	0	0	0	0	0	0	0	0	0	0
>k141_706390	291	0	1	0	0	2	0	0	1	0	8	1	0	0	2	0	0	0	0	0	1	0	2	0	2	1	1	0	6	2	6	0	0	1	0	0
>k141_706969	396	0	0	0	0	2	0	0	0	0	0	0	0	0	0	4	0	2	0	0	0	3	0	0	0	0	0	0	0	1	3	1	0	1	1	0
>k141_707360	462	0	0	0	0	0	0	0	0	0	0	0	0	7	5	1	0	0	0	0	0	6	0	0	0	0	0	0	0	0	0	0	0	4	0	0
>k141_708087	381	0	0	0	0	0	0	0	0	0	0	0	0	0	0	0	0	0	0	0	0	4	4	0	1	0	0	0	0	0	0	0	0	0	0	0
>k141_709102	501	1	0	0	0	0	0	0	2	0	0	0	0	0	0	6	0	0	0	0	0	1	7	2	2	0	0	0	0	3	0	0	1	0	0	0
>k141_709202	444	0	0	0	0	0	0	0	0	0	0	0	0	0	0	0	0	0	0	0	0	0	2	3	0	0	0	2	1	0	2	0	0	0	0	0
>k141_709221	633	0	0	0	0	0	0	0	0	0	0	0	0	3	1	1	5	0	6	3	6	3	23	3	4	0	0	0	0	3	1	0	3	0	3	0
>k141_709802	237	0	0	0	0	0	0	0	0	0	0	0	0	0	0	0	0	0	0	0	0	7	0	0	0	0	0	0	0	0	0	0	0	0	0	0
>k141_710688	387	0	0	0	0	0	0	0	0	0	0	0	0	0	0	2	0	0	0	0	0	0	0	0	0	0	0	1	1	0	2	2	0	0	7	0
>k141_710709	300	0	0	0	0	0	0	0	0	0	0	0	0	0	0	2	0	0	0	0	0	0	0	0	0	0	0	0	0	0	2	0	0	3	0	0
>k141_710750	690	0	0	0	0	2	0	0	0	0	0	0	0	10	5	7	0	0	0	0	0	2	3	0	0	0	0	0	0	0	0	0	3	2	2	0
>k141_711077	1128	5	0	0	1	0	0	2	4	0	4	0	0	1	6	6	0	1	2	0	2	4	6	1	2	0	0	0	0	4	0	0	5	15	0	4
>k141_711249	759	0	0	0	0	0	0	0	0	0	0	0	0	1	0	2	4	0	0	0	0	4	3	3	6	0	2	0	0	0	0	0	2	2	0	0
>k141_711544	1437	0	2	0	2	0	2	2	0	0	2	2	2	2	2	0	2	6	6	2	2	0	6	1	4	7	2	2	9	0	2	0	3	0	4	0
>k141_711858	414	0	0	0	0	0	0	0	0	0	0	0	0	0	0	0	0	0	0	0	0	0	0	2	2	0	0	0	2	0	0	0	2	0	0	0
>k141_711976	321	0	0	4	2	0	2	2	0	0	0	0	0	0	0	0	0	0	0	0	0	0	0	0	0	0	0	0	0	0	0	0	0	0	0	0
>k141_712609	414	0	0	0	2	0	0	0	0	0	0	0	0	0	0	6	0	0	0	0	0	2	0	0	0	0	0	0	0	0	2	0	0	0	0	2
>k141_712747	321	0	0	0	0	0	0	0	0	0	0	0	0	0	0	2	0	0	0	0	0	0	0	0	0	0	0	0	0	0	0	0	0	2	0	0
>k141_713170	456	0	0	0	0	0	0	0	0	0	0	0	0	0	0	2	0	0	0	0	0	4	0	2	0	0	0	0	1	0	0	0	0	3	0	0
>k141_713268	408	0	1	0	0	0	0	0	0	0	0	1	0	0	4	1	0	0	0	0	2	2	0	0	0	0	0	0	1	0	0	1	2	1	0	0
>k141_714050	675	1	0	0	0	0	0	0	0	0	0	0	0	4	0	7	0	0	0	0	2	10	8	1	11	0	0	0	1	1	0	0	7	0	0	0
>k141_714264	468	0	0	0	0	0	0	0	0	0	0	0	0	0	0	0	0	0	0	0	0	0	0	0	0	0	0	0	0	0	0	0	0	16	0	6
>k141_715364	399	0	0	0	2	0	0	0	0	0	0	0	0	2	0	2	0	0	0	0	0	3	0	2	1	0	0	0	0	0	1	0	0	0	0	0
>k141_715443	708	2	0	1	0	0	0	2	0	0	0	1	0	11	3	20	0	0	0	0	1	18	0	0	0	0	0	0	1	0	0	0	2	33	0	2
>k141_716401	306	1	0	0	0	0	0	0	0	0	0	0	0	0	0	0	0	2	0	0	0	0	2	0	0	0	0	0	0	1	0	0	2	0	0	2
>k141_716976	1347	0	0	0	0	0	0	0	4	0	2	2	0	0	10	0	0	0	0	0	0	4	8	0	3	0	0	0	2	0	2	0	0	0	0	0
>k141_717126	327	0	0	0	0	0	0	0	0	0	0	0	0	0	0	0	0	0	0	0	0	2	0	0	0	0	0	0	0	2	0	0	0	0	0	0
>k141_717347	1134	7	0	0	0	0	0	4	6	0	4	2	0	2	15	10	2	2	3	0	0	15	0	0	12	0	0	0	1	14	6	0	2	24	2	0
>k141_717710	300	0	0	0	0	0	0	0	0	0	0	0	0	0	2	2	0	0	0	0	0	2	0	0	0	0	0	0	0	0	0	0	0	3	0	0
>k141_717866	267	0	0	0	0	0	0	6	0	0	3	0	0	0	0	0	0	0	0	0	0	0	1	0	0	0	0	0	0	0	0	0	0	0	0	0
>k141_718416	366	0	0	0	0	0	0	0	0	0	0	4	0	0	0	0	0	0	0	0	0	7	0	0	0	0	0	0	0	0	0	0	0	0	0	0
>k141_718682	309	0	0	0	0	0	0	0	2	0	0	0	0	0	0	0	0	0	0	0	0	3	0	0	0	0	0	0	0	1	0	0	0	2	0	0
>k141_719275	1551	0	0	0	0	0	0	0	0	0	4	0	0	0	0	0	0	0	51	0	56	0	0	0	0	0	0	0	0	0	0	0	0	0	0	0
>k141_719741	1038	2	8	5	4	8	0	0	0	11	0	0	0	1	4	0	0	2	0	2	0	0	0	2	0	6	0	0	1	0	0	0	0	0	7	4
>k141_720267	231	0	0	0	0	0	0	0	0	0	0	0	0	0	0	0	2	0	0	0	0	4	0	0	0	0	0	0	0	0	0	0	1	1	0	0
>k141_720505	858	8	0	0	0	2	0	2	0	0	0	0	0	2	0	14	2	0	0	0	0	4	2	0	0	0	0	0	1	0	0	0	4	10	0	0
>k141_720643	213	2	0	0	0	0	0	0	0	0	0	0	0	0	0	0	0	0	0	0	0	1	0	0	0	0	0	0	0	3	0	0	0	4	0	0
>k141_721558	348	0	0	0	0	0	0	0	0	0	0	5	0	0	0	0	0	0	0	0	0	0	0	0	3	0	0	0	0	0	0	0	0	0	0	0
>k141_721968	831	32	0	0	4	0	0	4	10	0	11	10	2	2	0	11	0	0	0	0	0	0	17	0	3	0	0	0	2	14	0	0	3	20	0	11
>k141_723050	423	6	0	2	0	0	0	1	0	0	0	0	0	0	0	4	0	0	0	0	0	0	0	0	0	0	0	0	0	0	0	0	0	4	0	0
>k141_723376	309	0	6	8	6	1	2	8	4	9	12	17	6	11	21	0	50	24	8	31	27	0	1	15	23	15	10	51	13	18	29	16	38	24	31	4
>k141_724028	321	2	2	0	1	0	0	0	0	0	0	0	0	0	1	1	0	0	0	0	0	0	0	0	0	0	0	0	0	2	0	0	0	0	0	0
>k141_724509	615	0	0	0	0	0	0	0	0	0	0	0	0	0	0	0	1	3	0	0	4	0	2	3	4	0	0	0	0	0	0	0	2	0	0	0
>k141_725730	633	0	0	0	0	2	0	0	0	0	2	6	0	0	2	0	0	0	2	0	0	0	0	0	0	0	0	0	8	3	2	0	1	2	0	0
>k141_726861	543	6	0	0	0	0	0	0	0	0	0	0	0	2	0	1	0	0	1	0	0	3	0	0	2	0	0	0	0	1	1	0	2	2	0	0
>k141_727590	333	0	0	0	0	2	0	0	0	0	2	2	0	0	2	0	0	0	0	0	0	0	0	2	0	0	0	0	5	0	0	0	0	0	0	0
>k141_727918	411	116	187	326	225	292	158	334	184	287	166	351	366	413	345	0	28	113	45	143	22	1	20	80	61	64	38	30	54	15	71	25	40	28	276	122
>k141_728769	813	9	23	2	8	0	0	2	0	0	2	0	0	0	0	0	0	0	0	0	0	0	0	0	0	0	0	0	0	2	0	0	0	0	0	0
>k141_729245	393	0	0	0	0	0	0	0	0	0	0	0	0	0	0	0	0	0	0	0	0	0	2	2	0	0	0	0	0	0	0	0	0	0	0	0
>k141_730251	684	1	0	0	2	0	1	2	0	0	0	0	1	5	0	6	0	0	0	0	3	19	0	0	1	0	0	0	0	9	3	0	3	2	0	4
>k141_731502	513	0	0	0	0	0	0	0	0	0	0	0	0	0	0	0	0	0	0	0	0	0	3	2	2	0	0	2	0	0	2	2	0	0	0	0
>k141_732463	1077	15	1	0	8	0	4	4	4	4	5	16	1	2	6	17	3	0	3	0	2	6	9	0	4	0	0	2	1	4	6	2	2	9	0	5
>k141_733477	339	0	0	0	0	0	0	0	0	0	0	0	0	0	0	5	0	0	0	0	0	0	0	0	0	0	0	0	0	0	0	0	0	4	0	0
>k141_734074	348	0	0	0	0	0	0	0	0	0	0	0	0	0	0	1	0	0	0	0	0	2	0	0	0	0	0	0	2	0	0	0	0	2	0	1
>k141_734093	543	0	0	0	0	0	0	0	0	2	0	0	0	0	0	0	0	0	0	8	0	0	0	0	0	0	0	0	0	0	0	0	0	0	0	0
>k141_734126	264	0	0	0	0	0	0	0	0	0	0	0	2	0	0	2	0	1	0	0	0	0	0	0	0	0	0	0	0	0	1	0	0	0	0	5
>k141_734922	444	20	23	35	34	16	27	37	15	42	31	37	58	30	22	0	10	21	9	24	8	0	1	11	4	15	14	2	4	2	13	12	13	13	110	26
>k141_735936	1377	3	0	0	0	0	0	0	2	0	0	4	0	12	2	15	0	4	0	0	2	16	4	2	2	0	0	0	2	12	2	0	1	32	0	4
>k141_736743	516	0	0	0	0	0	0	2	0	0	0	8	0	0	0	0	0	0	2	0	0	0	4	0	2	0	0	0	0	0	0	0	0	0	0	0
>k141_737056	444	0	0	0	0	1	0	1	0	0	0	0	0	0	11	0	0	0	0	0	0	2	0	0	0	0	0	0	2	1	0	0	0	1	2	0
>k141_737531	1059	2	0	0	0	0	0	0	3	0	2	3	0	2	0	2	4	3	0	0	3	4	5	0	13	0	0	0	0	3	0	0	0	6	0	0
>k141_738023	1293	0	0	0	0	0	0	0	0	0	0	0	0	0	0	0	0	2	0	0	0	0	0	0	0	0	0	0	0	15	8	0	51	2	0	0
>k141_738270	1371	17	0	1	3	0	0	4	0	0	8	11	0	0	12	20	2	4	1	0	4	11	9	0	2	0	2	0	7	8	2	0	0	23	1	5
>k141_738841	672	0	0	0	0	0	0	0	0	0	0	0	0	0	0	2	0	0	0	0	0	0	0	0	0	0	2	0	0	4	0	0	0	15	0	0
>k141_740694	639	2	0	0	0	2	0	0	0	0	0	2	0	0	1	0	0	3	0	4	1	0	5	4	4	4	0	2	0	2	0	0	8	0	0	0
>k141_740911	357	0	0	0	0	0	0	0	0	0	0	0	0	0	0	2	0	0	0	0	0	0	0	0	2	0	0	0	0	0	0	0	4	0	0	0
>k141_741273	1740	8	3	2	0	4	0	5	2	0	10	2	2	6	3	8	4	2	1	2	0	22	8	1	7	0	0	0	6	12	2	0	0	35	0	6
>k141_742491	387	0	2	4	0	5	1	0	0	1	0	0	0	0	0	1	0	0	0	0	0	1	0	2	0	1	0	0	0	0	0	0	0	0	2	0
>k141_744248	2571	5	14	4	9	42	3	6	2	12	11	0	1	13	18	3	7	16	1	9	6	10	10	14	4	11	4	7	13	12	17	5	7	2	27	3
>k141_744249	759	5	0	0	4	0	0	5	0	0	2	4	0	0	1	0	0	0	0	1	0	0	1	0	0	0	0	0	1	3	1	2	0	2	0	4
>k141_744412	1266	1	0	0	0	0	0	0	0	0	0	1	0	1	0	7	0	1	0	0	0	2	0	0	1	0	0	0	0	0	0	0	0	51	0	1
>k141_745763	453	0	0	0	0	0	0	0	0	0	0	0	0	0	0	0	0	1	0	0	4	0	0	0	0	2	0	0	0	0	0	0	0	0	0	0
>k141_746141	777	3	1	0	2	2	0	2	0	0	0	0	2	2	6	5	0	0	0	0	0	1	1	0	0	0	0	0	0	2	0	0	0	8	0	4
>k141_747063	375	0	0	0	0	0	0	0	0	0	0	0	0	0	0	0	0	0	0	0	0	2	1	0	0	0	2	0	0	1	0	0	1	0	0	0
>k141_747121	369	0	0	0	0	0	0	0	0	0	0	0	0	0	0	0	0	0	2	0	4	5	3	1	0	0	2	0	0	6	0	0	0	10	0	4
>k141_750218	1314	4	0	1	2	0	0	0	2	0	0	0	0	5	0	8	4	5	8	0	5	13	45	6	24	0	0	2	3	11	3	0	19	2	2	0
>k141_750443	354	0	0	0	0	0	0	0	0	0	0	0	0	0	0	0	0	0	2	0	2	0	0	1	0	0	3	0	0	2	0	0	0	0	0	0
>k141_750494	375	0	0	0	3	0	0	0	1	0	0	1	0	0	1	3	0	0	0	0	0	1	5	0	0	0	0	0	0	0	0	0	1	3	0	2
>k141_750955	462	2	0	0	0	0	0	0	0	0	0	0	0	3	2	0	0	0	0	0	1	2	2	0	0	0	0	0	0	0	0	0	0	1	0	0
>k141_751048	561	0	0	0	0	0	0	0	0	0	2	2	0	0	2	4	2	5	4	6	16	0	0	0	0	0	0	2	2	0	0	0	0	7	0	2
>k141_751605	318	0	0	0	0	0	0	0	0	0	0	0	0	0	0	0	0	0	0	0	4	0	0	0	0	0	0	0	0	0	0	0	4	0	0	0
>k141_752136	1458	0	12	0	0	2	0	0	2	6	14	10	0	2	34	0	3	6	6	3	0	0	0	3	2	7	6	5	6	4	28	14	20	4	11	2
>k141_752142	354	0	0	0	0	4	0	0	0	1	2	0	0	0	0	0	0	0	0	0	4	0	0	0	0	0	0	0	0	0	0	0	0	0	0	0
>k141_752149	351	0	0	2	0	3	0	0	0	1	0	0	0	0	0	0	0	0	0	0	0	1	0	0	0	1	1	0	1	0	0	1	3	0	2	0
>k141_752301	711	2	2	0	1	0	0	0	0	0	0	0	0	3	2	4	0	0	0	0	0	0	2	1	0	0	2	0	0	3	0	0	2	30	0	0
>k141_753293	3366	7	0	0	0	0	0	1	0	0	0	0	0	0	0	27	16	10	23	4	0	54	408	4	80	0	5	0	0	16	0	0	0	10	0	12
>k141_753357	804	0	0	0	0	0	0	2	0	4	6	4	0	0	1	0	0	1	0	0	0	1	3	7	4	0	0	0	0	4	0	2	2	0	2	1
>k141_755892	342	1	0	0	0	0	0	0	0	0	0	0	0	0	0	0	0	0	0	0	0	0	2	1	0	0	0	2	0	0	0	0	0	0	0	0
>k141_756351	318	0	0	0	0	0	0	0	0	0	2	2	0	0	2	0	0	0	0	0	0	2	0	2	2	0	0	0	0	0	0	0	0	2	0	0
>k141_757066	411	0	1	2	4	0	0	0	0	3	0	2	2	0	2	0	0	0	0	0	0	0	0	0	0	0	0	0	0	0	0	0	0	0	3	0
>k141_757729	675	0	8	2	0	0	0	3	0	7	1	0	1	1	1	0	0	2	4	0	4	1	0	0	1	0	0	0	0	3	0	0	4	1	3	3
>k141_757960	423	0	0	0	0	0	0	0	0	0	0	0	0	0	0	1	0	2	0	1	0	0	0	0	0	0	0	0	0	0	2	0	0	0	0	0
>k141_758521	510	0	2	0	0	0	0	0	0	0	0	0	0	0	0	1	0	0	0	0	0	0	0	0	0	0	0	0	2	2	0	0	2	2	0	1
>k141_759036	312	0	0	1	0	0	0	0	0	0	0	0	0	0	0	0	0	0	0	0	0	0	0	0	0	0	0	0	0	0	0	0	0	0	0	0
>k141_759937	465	0	0	0	0	0	0	0	0	0	0	0	0	0	0	6	0	0	0	0	0	3	0	0	2	0	0	0	0	0	0	0	0	4	0	0
>k141_760036	381	0	0	0	0	0	0	0	0	0	0	0	0	0	0	0	0	1	0	0	0	0	0	0	2	0	2	0	0	0	0	0	6	0	0	0
>k141_761086	657	0	0	2	0	0	0	0	0	0	0	0	0	0	7	0	0	0	0	0	0	0	0	0	0	0	0	2	2	0	0	2	4	0	0	0
>k141_761526	330	0	0	0	0	0	0	0	0	0	0	0	0	0	0	2	1	1	2	0	2	5	9	2	5	0	0	1	0	0	1	0	3	1	0	0
>k141_761772	540	0	0	0	0	0	0	0	1	0	0	1	0	0	2	0	2	4	6	7	4	2	1	2	5	2	0	4	0	3	6	2	2	0	3	0
>k141_762073	804	0	0	0	0	0	0	0	2	0	0	2	0	4	9	0	0	2	0	0	0	6	3	0	0	0	0	0	0	0	2	0	0	12	0	2
>k141_762277	369	0	0	0	0	0	0	0	0	0	0	0	0	0	0	2	0	0	0	0	0	0	1	0	0	0	0	0	0	2	0	0	0	2	0	0
>k141_762670	2478	34	0	0	2	0	0	4	4	0	0	1	0	25	0	47	8	11	3	0	0	65	9	3	1	0	0	0	0	37	1	0	6	25	0	6
>k141_763598	633	0	7	0	8	4	2	1	0	0	0	0	1	0	0	0	0	3	0	0	0	0	0	0	0	0	0	0	0	2	0	0	0	0	4	0
>k141_765227	1062	25	17	5	8	0	0	8	0	0	0	0	0	0	0	0	0	0	0	0	0	1	0	0	0	0	0	0	0	0	0	0	0	0	0	0
>k141_765237	594	0	0	0	0	0	0	0	0	0	0	0	0	0	1	3	0	0	0	0	4	14	1	1	2	0	0	0	0	0	0	0	0	2	2	2
>k141_765482	1683	7	2	9	2	10	4	2	3	6	24	35	4	6	91	0	8	21	10	18	4	0	3	2	5	16	12	8	17	6	15	4	2	12	15	8
>k141_765810	648	0	0	0	0	0	0	0	0	0	0	0	0	1	0	8	0	0	0	0	0	7	1	4	2	0	0	0	2	2	0	0	2	11	0	4
>k141_766409	657	0	1	0	0	0	0	0	0	0	0	0	0	2	0	3	0	2	0	0	4	2	1	2	0	1	0	2	4	0	2	2	2	0	0	2
>k141_767581	594	0	0	0	0	0	0	0	0	0	0	0	0	0	0	0	0	0	0	0	0	1	4	0	4	0	2	2	0	0	0	0	0	0	0	0
>k141_768362	606	2	0	0	0	1	0	2	0	0	2	0	0	0	4	0	0	0	0	0	0	1	0	0	8	0	0	0	2	2	0	0	1	8	0	2
>k141_768366	543	0	0	0	1	0	0	0	0	0	0	0	0	0	0	3	0	4	0	0	0	5	2	0	4	0	0	4	0	0	0	0	2	2	0	0
>k141_768772	660	7	0	0	2	0	0	0	0	1	0	0	0	0	0	4	1	3	0	0	0	3	0	0	0	0	0	0	0	2	0	0	2	2	0	3
>k141_768817	306	0	0	0	0	0	0	0	0	0	0	0	0	0	0	2	0	0	4	0	0	0	2	0	2	0	0	0	0	0	0	0	0	0	0	0
>k141_769022	921	2	1	1	6	5	0	4	6	1	3	10	0	6	2	15	8	3	0	2	3	8	13	2	10	0	0	0	0	8	3	0	4	2	1	1
>k141_769270	804	0	0	0	0	0	0	0	0	0	0	0	0	0	0	2	0	2	0	0	0	0	29	0	6	0	0	0	0	0	0	0	0	0	0	0
>k141_770916	408	0	2	0	0	0	0	0	0	0	2	2	0	0	2	0	0	0	1	2	0	0	1	0	2	0	2	0	0	2	0	1	0	0	0	0
>k141_771308	1191	2	0	0	0	0	0	0	0	0	1	4	0	0	0	3	0	1	5	0	0	12	1	5	9	0	0	0	2	9	2	0	7	0	0	0
>k141_772761	393	5	7	0	3	0	0	0	0	0	0	0	0	0	0	0	0	0	0	0	0	0	0	0	0	0	0	0	0	0	0	0	0	0	0	0
>k141_773410	480	2	0	0	0	0	0	0	0	0	0	0	0	0	2	0	0	0	0	0	2	0	2	0	0	0	0	0	0	4	0	0	0	6	0	0
>k141_773811	351	0	0	0	0	0	0	0	0	0	0	0	0	0	0	0	0	2	0	0	1	0	2	0	2	0	0	0	0	7	0	0	2	0	0	0
>k141_774314	564	0	0	0	0	3	0	0	0	0	3	0	0	0	0	5	0	0	0	2	0	7	0	0	0	0	0	0	0	0	1	0	0	6	0	2
>k141_774400	390	0	0	0	0	0	0	0	0	0	0	0	0	0	0	0	2	0	0	0	0	0	2	0	2	0	0	0	0	0	2	0	0	0	0	0
>k141_775167	549	0	2	0	0	0	0	0	0	0	0	2	0	0	7	0	0	0	0	0	0	2	0	0	0	0	0	0	0	2	4	0	0	5	0	2
>k141_777095	1038	6	0	0	6	2	0	0	0	0	2	0	0	4	2	30	0	0	0	0	0	1	0	0	2	0	0	0	0	0	4	0	0	6	0	1
>k141_777790	309	0	0	0	0	0	0	0	0	0	0	0	0	0	0	0	0	1	0	0	0	0	0	0	0	0	0	0	0	4	0	1	0	0	0	0
>k141_778033	525	0	0	0	1	1	0	0	0	1	2	2	0	1	1	7	0	3	3	1	0	0	4	3	4	1	0	4	0	0	0	0	0	1	0	0
>k141_778161	435	0	0	0	0	0	0	0	0	0	0	2	0	0	4	0	0	0	0	0	0	0	0	0	2	0	0	0	0	0	2	0	0	0	0	1
>k141_779422	399	0	0	0	0	0	0	0	0	0	0	0	0	0	0	0	0	0	0	0	0	0	5	0	0	0	0	0	0	0	0	0	0	0	0	0
>k141_779774	327	5	0	0	0	0	0	2	0	0	4	5	0	2	2	7	0	0	0	0	2	2	4	0	1	0	0	0	0	2	2	0	1	4	0	7
>k141_779858	855	37	0	1	4	0	0	6	2	0	0	0	0	6	4	17	0	0	0	0	0	25	3	0	4	0	0	0	0	42	1	0	7	21	0	0
>k141_779883	342	0	0	0	0	0	0	0	0	0	0	0	0	0	0	0	0	0	0	0	0	9	0	0	0	0	0	0	0	0	0	0	0	0	0	0
>k141_779937	405	0	0	0	0	0	0	0	0	0	0	0	0	0	0	0	5	0	0	0	0	0	1	0	0	0	0	0	2	0	0	0	2	0	0	0
>k141_780074	321	125	156	226	228	231	156	246	73	153	99	204	216	233	175	0	7	55	16	63	11	0	10	52	23	43	9	10	10	5	19	9	33	4	166	46
>k141_780680	621	4	0	1	0	0	0	4	2	0	2	0	0	6	0	8	0	0	0	0	0	0	4	0	8	0	0	0	0	7	1	0	6	2	0	0
>k141_781498	378	0	0	0	0	2	0	2	0	0	0	0	1	0	0	0	0	0	0	0	0	2	0	0	0	0	0	0	0	0	0	0	4	0	0	0
>k141_781553	459	0	0	0	0	0	0	0	0	0	0	2	0	0	0	0	3	0	2	0	1	2	0	0	0	0	0	0	0	0	0	0	0	0	0	0
>k141_782713	1077	0	1	0	0	0	0	0	0	0	0	0	0	8	18	12	0	2	2	0	0	0	0	0	2	0	0	0	2	0	0	0	0	13	0	2
>k141_782939	759	6	1	2	4	0	0	4	0	0	0	2	0	2	0	0	0	0	4	2	0	0	0	0	1	0	0	0	0	4	1	0	0	4	0	4
>k141_783172	405	0	0	0	0	0	0	0	0	0	0	0	0	0	0	0	0	0	0	2	2	2	0	2	0	0	0	0	0	2	0	0	4	0	0	0
>k141_783507	426	0	0	0	0	0	0	0	0	0	0	0	0	0	0	0	0	0	0	0	0	0	0	0	0	0	0	0	0	0	0	0	0	15	0	0
>k141_783558	627	0	0	0	0	0	0	0	0	0	0	0	0	0	0	3	2	3	1	0	2	4	0	0	0	0	0	0	0	4	1	0	6	8	0	2
>k141_784626	2103	0	73	13	9	14	0	6	16	28	51	115	11	41	423	0	8	9	14	2	48	0	34	25	40	12	68	57	165	46	65	19	59	55	30	12
>k141_785247	1596	30	2	0	6	0	2	8	0	0	4	3	2	2	5	4	0	2	2	2	0	4	4	0	6	0	2	0	0	3	2	0	4	9	0	2
>k141_787970	537	0	0	0	0	0	0	0	0	0	0	0	0	0	0	0	0	0	0	0	0	5	0	0	0	0	0	0	0	0	0	0	0	9	0	5
>k141_788158	801	192	2	0	28	0	0	16	6	0	1	0	4	40	2	17	3	2	1	0	2	34	1	0	0	0	0	0	0	55	2	0	16	14	0	7
>k141_789447	408	0	0	0	0	0	0	0	0	2	0	0	0	0	0	0	0	0	0	0	0	0	0	4	0	0	0	0	0	0	0	0	0	0	0	1
>k141_789693	306	0	0	0	0	6	0	0	0	0	2	0	0	0	0	0	0	0	0	0	0	0	0	0	0	0	0	0	0	0	0	0	0	0	0	0
>k141_789910	351	0	1	0	0	2	0	0	0	0	0	0	2	1	0	0	0	0	0	0	0	0	0	0	0	0	1	0	0	0	0	0	0	1	0	0
>k141_793209	525	4	1	0	0	0	0	0	0	0	0	0	0	0	4	0	0	0	0	0	0	2	0	0	0	0	0	0	0	2	0	0	1	22	0	0
>k141_793257	339	0	0	0	2	0	0	0	0	0	0	0	0	0	0	1	0	0	0	0	0	2	2	0	0	0	0	0	0	0	0	0	0	2	0	0
>k141_793590	321	1	0	0	0	0	0	0	0	0	0	0	0	0	0	3	0	0	0	0	0	0	0	0	0	0	0	0	0	1	0	0	2	5	0	0
>k141_793783	969	0	0	0	0	0	0	0	0	0	0	6	0	0	0	0	2	2	1	8	0	0	2	0	8	0	6	2	8	0	2	0	0	0	0	0
>k141_794233	327	0	0	0	0	0	0	0	0	0	0	0	0	2	0	1	0	2	0	0	0	2	0	0	0	0	0	0	0	0	0	0	0	0	0	0
>k141_794486	330	0	0	0	0	0	0	0	0	0	0	0	0	0	0	0	0	0	0	0	0	0	0	0	2	0	0	0	0	0	2	0	1	0	0	0
>k141_794655	318	0	0	0	0	0	0	0	0	0	0	0	0	0	0	0	0	0	0	0	0	2	15	2	7	0	0	0	0	0	0	0	0	0	0	0
>k141_796213	416	0	0	0	0	0	0	0	0	0	0	0	0	2	1	0	0	0	0	0	0	2	0	0	0	0	0	0	0	0	0	0	0	0	0	0
>k141_797192	354	0	0	0	0	0	0	0	0	0	0	0	0	0	1	0	0	0	2	0	0	0	0	0	2	0	0	2	0	0	0	1	0	0	0	0
>k141_797921	1518	1	2	0	0	2	0	2	4	8	8	10	4	0	0	0	2	3	8	0	0	0	2	0	0	0	4	2	0	0	0	4	0	0	0	2
>k141_799382	354	0	0	0	0	0	0	0	0	0	0	0	0	0	0	0	0	1	0	0	1	0	0	0	2	0	0	0	0	0	0	0	2	0	0	0
>k141_800259	474	0	1	0	0	0	0	0	0	0	0	0	0	3	1	6	0	0	0	0	0	11	0	0	0	0	0	2	0	0	0	0	0	6	0	2
>k141_800461	384	0	0	0	0	0	0	0	0	0	0	0	0	0	0	0	0	0	0	0	0	3	0	0	0	0	0	0	0	0	2	0	0	6	0	0
>k141_801093	1548	16	0	0	6	0	0	2	0	0	0	0	0	8	0	8	0	2	2	0	0	6	2	0	2	0	0	0	0	6	0	0	0	6	0	2
>k141_801375	1038	0	0	0	0	0	0	0	0	0	0	0	1	0	22	4	0	0	0	0	0	0	0	0	0	0	4	0	0	0	6	0	0	17	0	6
>k141_802217	321	0	0	0	0	0	0	0	0	0	0	2	0	1	0	3	2	0	0	0	1	1	1	0	0	0	4	0	6	0	2	0	0	1	0	0
>k141_802661	1653	5	2	2	9	16	2	2	1	25	0	12	4	11	0	2	2	13	0	8	9	0	7	12	4	6	0	10	5	2	16	4	9	0	14	4
>k141_804198	429	0	0	0	0	0	0	0	0	0	0	0	0	0	2	2	0	0	0	0	0	1	0	0	0	0	0	0	0	0	0	0	0	4	0	0
>k141_804429	285	0	0	0	0	0	0	0	0	0	0	0	0	0	0	0	0	0	0	0	0	2	0	0	0	0	0	0	0	2	0	0	4	0	0	2
>k141_805095	408	2	0	0	0	0	0	2	0	0	4	0	2	0	0	0	2	0	0	0	0	2	3	0	0	0	0	0	1	1	0	0	4	0	0	1
>k141_805634	216	0	0	0	0	0	0	0	0	0	0	0	0	0	0	0	0	2	0	0	0	4	0	0	0	0	0	0	0	0	0	0	0	0	0	0
>k141_806750	1107	72	221	159	154	131	86	172	115	143	131	219	168	201	501	0	201	304	129	263	163	3	40	97	110	180	150	117	239	156	317	108	297	131	326	95
>k141_806920	255	53	174	153	128	160	76	140	69	117	106	143	158	184	470	1	138	190	82	203	109	0	26	57	78	134	134	105	189	91	208	55	172	163	217	83
>k141_807261	261	0	0	0	0	0	0	0	0	0	0	0	0	0	8	1	0	0	0	0	0	0	0	0	2	0	0	0	0	0	0	0	2	0	2	0
>k141_807612	555	0	0	0	0	0	0	0	0	0	0	0	0	2	0	5	9	3	1	0	6	2	3	2	2	0	0	0	0	0	4	0	7	0	0	0
>k141_808087	462	0	0	0	0	0	0	0	0	0	0	0	0	4	2	2	0	1	0	0	0	4	0	0	0	0	0	0	0	0	0	0	0	0	0	0
>k141_808271	309	3	0	0	0	0	0	0	0	0	0	0	0	0	0	0	0	0	0	0	0	0	0	0	0	0	0	0	0	0	0	0	0	8	0	0
>k141_808398	924	0	0	0	0	0	0	0	0	0	0	0	0	0	0	0	0	2	0	0	4	0	0	0	2	6	0	0	2	0	10	0	4	0	1	0
>k141_808529	381	0	0	0	0	0	0	0	0	0	0	0	0	0	0	7	0	0	0	0	0	0	0	0	1	0	0	0	0	0	0	0	2	0	0	1
>k141_810723	372	0	0	2	0	2	0	0	0	2	2	2	0	0	0	0	0	0	2	0	0	4	1	0	0	2	0	0	2	3	3	3	2	0	0	0
>k141_812833	348	0	0	0	0	0	0	0	0	0	0	0	0	0	0	0	2	0	0	0	0	2	2	0	0	0	0	0	0	0	0	0	0	2	0	0
>k141_812850	345	0	0	2	0	0	0	2	0	0	0	0	0	0	0	2	0	0	0	0	0	0	0	0	0	0	0	0	0	2	0	0	0	0	0	0
>k141_813083	687	3	0	0	0	0	0	0	0	0	0	0	0	0	2	0	0	0	0	0	0	2	0	0	0	0	0	0	0	0	4	0	2	27	0	0
>k141_814377	372	8	0	0	0	0	0	2	0	0	0	0	0	0	0	0	0	0	0	0	0	0	0	0	0	0	0	0	0	0	0	0	0	0	0	0
>k141_815723	675	3	3	1	1	9	1	4	0	5	2	4	2	4	3	14	1	3	1	2	2	12	4	0	5	0	0	4	2	5	4	0	2	0	2	4
>k141_816499	501	9	0	0	0	0	0	0	6	0	0	2	1	0	0	8	1	0	0	1	0	12	2	0	0	0	2	0	0	3	0	0	0	0	0	0
>k141_816971	324	0	0	0	0	0	0	0	0	0	0	0	0	0	1	3	0	0	0	0	0	1	0	0	0	0	0	0	0	0	0	0	0	5	0	1
>k141_817581	411	0	4	2	0	0	0	1	1	8	7	10	0	3	13	0	100	31	57	28	59	4	21	20	52	21	8	34	59	26	20	7	33	39	23	4
>k141_817667	459	1	0	0	0	0	0	0	0	2	2	2	0	0	0	0	2	4	0	0	5	0	0	1	0	0	2	0	10	0	5	0	0	2	4	0
>k141_817719	294	0	0	0	0	0	0	0	0	0	0	0	0	0	0	0	0	0	0	0	0	2	0	0	0	0	0	0	0	2	0	0	0	1	0	2
>k141_817838	378	0	0	0	0	0	0	0	0	0	0	0	0	0	0	0	5	2	0	0	0	0	0	0	0	0	0	0	0	0	0	0	0	0	0	0
>k141_818749	633	0	0	0	0	0	0	0	0	0	0	2	0	0	9	2	0	0	0	0	0	4	0	0	2	0	0	0	0	0	0	0	0	8	0	0
>k141_818785	867	46	0	1	4	0	3	4	1	0	2	0	1	0	0	12	1	1	0	0	0	16	4	1	1	0	0	0	0	31	1	2	4	17	0	3
>k141_818897	372	0	0	0	0	0	0	0	0	0	0	0	0	0	0	0	0	0	0	0	0	0	9	0	4	0	0	0	0	0	0	0	0	0	0	0
>k141_818944	306	0	0	0	0	0	0	0	0	0	0	0	0	2	0	0	0	1	4	0	0	0	0	0	0	0	0	0	0	0	0	0	0	0	0	0
>k141_819019	816	2	0	0	4	9	0	4	0	0	2	0	4	0	0	0	0	0	0	1	0	0	0	0	2	0	0	0	0	0	2	0	0	0	0	0
>k141_819114	327	2	0	0	2	0	0	0	0	0	0	2	0	0	0	0	0	0	0	0	0	0	0	0	0	0	0	0	0	0	0	0	0	0	0	0
>k141_819118	1341	20	8	6	27	33	6	10	3	10	27	20	10	17	6	9	3	10	8	10	8	4	15	21	11	10	0	20	4	2	25	2	9	7	22	7
>k141_819437	405	0	0	0	2	0	0	0	0	0	0	0	0	5	2	8	0	0	1	0	0	24	3	0	0	0	1	0	0	4	2	0	1	8	0	5
>k141_819927	519	2	0	0	0	0	0	0	0	3	0	1	0	0	0	5	0	1	0	1	0	10	0	0	1	0	0	0	0	0	1	0	1	1	0	0
>k141_820119	591	9	0	0	0	0	0	2	1	0	2	2	1	3	1	8	0	1	0	0	0	2	7	0	4	0	0	0	2	1	1	0	0	0	0	0
>k141_820237	300	0	0	0	0	0	0	0	0	0	1	2	0	0	0	0	0	0	0	0	0	0	0	0	0	0	0	0	0	0	0	0	0	0	2	0
>k141_821149	546	0	0	0	0	0	0	0	0	0	0	0	0	2	2	1	0	0	0	0	0	3	2	0	0	0	0	0	0	2	0	0	0	0	0	2
>k141_822233	219	0	0	0	2	0	0	0	0	0	1	0	0	0	0	0	0	0	0	0	0	0	0	0	0	0	0	0	0	0	0	0	0	0	1	0
>k141_822378	384	0	0	0	0	0	0	0	0	0	0	0	0	0	0	0	0	4	0	4	0	0	0	0	0	0	0	0	0	0	0	0	0	0	0	0
>k141_822913	747	7	10	0	4	0	0	7	0	0	2	0	0	0	0	0	0	0	0	0	0	0	0	0	0	0	0	0	0	0	0	0	0	0	0	0
>k141_823886	783	4	7	11	1	23	6	4	0	2	2	4	4	2	10	1	2	0	1	0	1	11	1	2	2	2	0	2	2	3	4	2	4	4	7	1
>k141_824043	1542	18	0	0	2	0	0	5	0	0	22	12	3	4	11	21	1	2	1	2	4	7	11	0	7	1	0	0	10	5	0	0	13	13	3	9
>k141_825007	1068	2876	5960	6676	5864	5519	3227	5995	3151	5207	5377	6140	6511	8352	10152	33	5569	7154	3528	7127	3751	111	1219	3372	3130	5015	4069	3098	4983	3093	5314	2225	4960	3827	6022	2732
>k141_825989	498	0	0	0	0	0	0	0	0	0	0	0	0	0	0	0	0	0	2	0	0	0	0	0	2	0	0	0	0	1	2	0	0	0	0	0
>k141_826161	321	0	0	0	0	0	0	0	0	0	0	0	0	0	0	0	0	0	0	0	0	2	2	2	0	0	0	2	0	0	0	0	2	0	0	0
>k141_826356	738	0	0	0	0	0	0	0	0	0	0	0	0	7	8	7	0	0	0	0	0	0	6	0	0	0	0	0	0	0	0	0	0	3	0	0
>k141_826674	381	0	0	0	0	0	0	0	0	0	0	0	0	0	0	2	0	0	0	0	0	6	0	0	0	0	0	0	0	2	0	0	0	0	0	0
>k141_828290	315	0	0	0	0	0	0	0	0	0	0	1	0	0	2	0	0	0	0	0	0	0	0	0	2	0	0	0	0	0	0	0	2	0	1	0
>k141_828482	381	0	0	0	0	0	0	0	0	0	0	0	0	2	4	1	0	0	0	0	0	0	0	0	2	0	0	0	0	0	0	0	2	0	0	0
>k141_828844	372	0	1	0	0	0	0	0	0	0	0	0	0	0	0	0	0	0	0	0	0	0	0	0	0	0	0	0	0	3	2	0	0	0	0	0
>k141_829175	1314	0	0	0	0	0	0	0	0	0	6	2	0	2	0	39	0	0	0	0	0	26	3	0	0	0	0	0	0	0	0	0	0	6	0	2
>k141_829193	813	0	0	0	0	0	0	0	0	0	0	0	0	2	0	2	0	0	0	0	0	2	2	0	0	0	0	0	0	0	0	0	0	16	0	0
>k141_829220	366	0	0	0	0	0	0	0	0	0	0	0	2	0	0	1	0	0	0	0	0	4	0	0	0	0	2	0	0	0	0	0	0	5	0	0
>k141_829433	357	6	0	0	0	0	0	2	0	0	0	1	0	0	2	0	0	0	0	0	0	4	0	0	0	0	0	0	0	0	0	0	0	5	0	0
>k141_829448	393	0	0	0	1	0	0	0	0	0	2	0	0	0	0	0	4	0	0	0	0	1	0	0	0	0	0	0	0	4	0	0	0	1	0	0
>k141_830291	1173	1	0	0	3	0	0	2	0	0	0	0	2	0	2	7	6	4	1	0	0	11	8	0	6	0	0	0	0	32	2	0	34	5	0	2
>k141_830944	372	0	0	0	0	4	0	0	0	0	0	0	0	0	0	0	0	1	0	0	0	0	2	0	0	0	2	0	0	0	0	0	0	0	0	0
>k141_831455	744	2	0	0	0	0	0	0	0	0	3	4	0	0	0	0	0	0	0	0	0	0	0	1	0	0	0	0	0	11	2	0	13	0	0	0
>k141_831698	489	6	0	2	4	10	3	0	1	3	2	1	3	0	0	0	0	0	0	0	0	0	0	0	0	2	0	0	2	4	0	1	0	5	6	0
>k141_832580	306	0	0	0	0	0	0	0	0	0	0	0	0	0	0	0	0	0	0	0	2	4	0	0	0	0	0	0	0	0	0	0	0	0	0	0
>k141_832623	342	0	0	0	0	0	0	0	0	0	0	0	0	0	0	0	2	0	1	0	1	0	0	0	2	0	0	2	0	2	2	0	2	0	0	0
>k141_833473	576	2	2	0	1	0	2	0	0	1	2	4	1	2	5	2	0	3	1	1	0	2	0	0	0	2	2	0	0	2	3	0	1	0	2	0
>k141_833602	441	0	0	0	0	0	0	0	0	0	0	0	0	0	2	0	0	2	0	2	2	1	0	0	0	2	0	0	0	0	0	0	2	0	0	0
>k141_833811	1152	21	7	10	15	40	7	17	0	16	15	30	3	4	1	2	4	4	6	9	5	1	10	8	24	10	1	7	9	7	17	4	3	3	20	0
>k141_833889	333	3	0	0	0	2	0	5	2	0	2	0	0	0	12	2	0	0	0	0	0	2	6	0	1	0	0	0	1	4	3	0	0	7	0	1
>k141_834379	348	0	2	0	0	0	0	0	0	0	0	0	0	0	0	0	1	0	2	0	0	0	0	0	0	0	0	0	0	0	0	0	0	1	2	0
>k141_835637	306	0	0	0	0	0	0	0	0	0	4	0	0	0	0	3	0	0	0	0	0	0	2	2	0	0	0	0	0	0	0	0	2	0	0	0
>k141_837282	426	0	2	0	0	0	0	0	0	0	0	0	0	0	0	6	0	0	0	0	0	4	0	0	0	0	0	0	0	0	0	0	0	1	0	0
>k141_838069	387	0	0	0	0	0	0	0	0	0	0	0	0	0	4	0	0	0	0	0	0	0	0	0	2	0	0	0	4	0	2	0	0	0	0	0
>k141_838654	747	0	0	0	0	0	0	0	0	0	2	4	0	0	0	9	0	0	0	0	0	12	2	0	0	0	0	0	0	0	0	0	0	10	0	2
>k141_839616	387	0	0	2	0	0	0	0	0	0	2	4	0	0	0	0	0	0	0	0	0	0	0	2	1	0	0	0	0	0	0	0	0	0	0	0
>k141_840045	423	2	0	0	0	0	0	2	0	0	2	2	0	1	0	3	0	0	0	0	0	7	2	0	0	0	0	0	0	0	0	0	0	0	0	2
>k141_840101	408	0	0	0	0	0	0	0	0	0	0	0	0	0	1	0	0	3	0	0	0	0	2	0	2	0	0	0	0	0	0	0	0	0	0	0
>k141_841406	555	0	1	0	0	2	2	0	0	2	6	4	0	0	0	3	1	0	2	0	0	0	1	1	6	2	2	0	3	0	1	0	5	0	4	0
>k141_841702	333	0	0	0	0	0	0	0	0	0	0	0	0	0	0	0	0	0	2	0	0	0	4	0	2	0	0	0	0	1	2	0	0	0	0	0
>k141_843811	342	2	2	0	0	4	0	0	2	3	1	4	3	2	3	4	0	1	1	0	0	1	3	3	3	0	0	0	0	4	6	0	1	0	6	0
>k141_843905	366	0	0	0	0	0	0	0	0	0	0	0	0	0	0	0	0	0	0	0	0	2	2	0	4	0	0	0	0	0	0	0	3	2	0	1
>k141_844046	657	0	0	0	0	0	0	0	0	0	0	2	0	0	0	1	0	0	0	0	0	3	0	0	0	0	0	0	2	5	0	0	10	0	0	1
>k141_844120	498	0	0	0	0	0	0	0	0	0	0	0	0	0	0	0	2	0	2	0	4	0	0	0	0	0	0	0	0	0	6	0	2	0	0	0
>k141_844298	501	7	0	0	0	0	0	0	0	0	0	0	0	0	0	1	0	0	2	0	0	1	0	0	0	0	0	0	0	6	0	0	0	0	0	0
>k141_844803	453	6	0	0	1	0	0	11	4	0	0	0	0	2	11	5	0	3	0	0	2	5	2	0	8	0	1	0	0	0	0	0	0	6	0	4
>k141_846771	753	6	0	0	2	0	0	6	4	0	0	0	1	2	0	22	0	0	0	0	0	23	2	0	0	0	0	0	0	0	0	0	0	1	0	0
>k141_847173	294	2	0	0	0	0	0	0	0	0	0	2	0	0	0	0	0	0	0	0	0	0	0	0	2	0	0	0	0	0	0	0	0	0	2	0
>k141_847732	751	0	0	0	0	0	0	0	0	0	2	4	0	0	13	0	0	0	0	0	0	2	2	0	2	0	0	0	0	0	0	1	0	2	0	0
>k141_847892	375	0	1	0	1	0	0	0	0	0	0	0	0	0	0	0	0	0	0	0	0	0	0	0	0	0	0	0	0	0	0	0	0	0	0	0
>k141_848290	531	0	0	0	0	0	2	0	0	0	0	4	0	0	0	0	0	0	2	0	0	0	0	4	0	0	0	0	0	0	0	0	0	0	0	0
>k141_849270	336	0	0	0	0	0	0	0	0	0	0	3	0	0	0	0	0	0	0	2	0	4	0	0	0	0	0	0	0	0	0	0	0	0	0	0
>k141_849843	360	4	0	0	0	2	0	0	0	0	1	2	0	4	1	5	0	0	0	0	0	0	0	0	0	0	0	0	0	0	0	0	0	6	0	0
>k141_850057	780	1	0	0	0	0	0	0	0	0	0	0	2	2	11	8	0	2	0	1	0	3	2	0	0	0	0	0	1	3	1	0	0	15	0	0
>k141_850391	465	0	0	2	0	5	2	0	0	0	0	0	2	0	2	2	0	2	2	2	0	1	0	2	0	2	0	4	0	0	2	0	0	2	1	0
>k141_850633	564	0	0	0	0	0	0	0	0	0	0	0	0	0	0	0	0	0	0	0	0	9	3	0	2	0	0	0	0	0	0	0	0	0	0	0
>k141_851422	348	0	0	0	0	0	0	0	0	0	0	4	0	0	0	1	0	0	0	0	0	4	0	0	0	0	0	0	0	0	0	0	0	1	0	1
>k141_852989	3345	2	0	0	0	0	0	0	0	0	2	0	0	27	0	74	43	50	13	2	2	481	154	0	31	0	2	0	0	0	0	0	0	35	0	19
>k141_853030	348	0	0	0	0	2	2	0	2	0	0	0	0	0	0	0	0	0	2	0	0	3	1	2	0	0	0	0	0	0	0	0	0	1	0	0
>k141_853649	1131	2	0	0	0	0	0	0	0	0	0	4	0	0	3	2	0	8	3	6	15	0	0	0	0	0	0	0	2	1	0	0	0	2	0	0
>k141_854757	330	0	0	0	0	0	0	0	0	0	0	0	0	0	0	0	2	0	0	0	0	0	0	0	0	0	0	2	0	2	0	0	0	0	0	0
>k141_855091	360	0	0	2	0	0	0	0	0	0	0	0	0	0	0	0	0	0	0	0	0	0	0	0	0	0	0	0	0	0	0	0	0	0	0	0
>k141_855132	609	6	0	0	0	0	0	4	0	0	0	0	0	0	0	2	0	0	0	0	0	0	0	0	0	0	0	0	0	2	0	0	0	1	0	0
>k141_855177	393	0	0	0	0	0	0	0	0	0	1	0	0	2	0	2	0	0	0	0	0	0	0	0	2	0	0	0	0	4	0	0	0	0	0	0
>k141_855545	405	0	0	0	0	0	0	0	0	0	0	2	0	0	0	0	0	2	0	0	0	0	0	0	0	0	0	0	4	0	0	0	0	0	0	0
>k141_855595	393	0	0	0	0	0	0	0	0	0	0	0	0	0	0	0	0	2	0	0	0	0	0	0	0	0	0	0	0	1	0	0	2	0	0	0
>k141_856990	750	0	0	0	1	0	0	0	0	0	0	0	0	0	1	0	6	2	5	2	5	1	8	4	8	3	0	4	0	1	7	4	0	1	0	0
>k141_857042	297	0	0	0	0	0	0	0	0	0	0	2	0	6	0	0	0	0	0	0	0	0	0	0	2	0	0	0	0	0	0	0	0	0	0	2
>k141_858051	705	7	3	1	1	0	8	5	8	0	5	10	0	3	8	36	3	0	0	1	2	9	10	2	4	0	0	0	2	4	8	0	8	22	7	1
>k141_860068	348	1	0	0	0	0	0	0	0	0	0	0	0	0	0	1	0	0	0	0	0	4	0	0	0	0	0	0	0	0	2	0	0	0	0	0
>k141_860926	441	2	3	0	0	1	0	0	0	0	2	3	0	0	1	7	0	1	0	0	0	7	0	1	1	0	0	0	0	0	0	0	0	3	0	0
>k141_862004	342	2	0	0	0	0	0	0	0	0	0	0	2	0	0	1	0	0	0	0	0	4	2	0	0	0	0	0	0	1	0	0	0	0	0	0
>k141_863073	318	0	0	0	1	0	0	0	0	0	0	0	1	2	0	0	0	2	0	0	0	0	0	0	0	2	0	0	0	0	0	0	0	0	0	0
>k141_863601	303	0	0	0	0	0	0	0	0	0	0	0	0	0	2	0	0	0	0	0	0	0	0	0	0	0	0	0	0	4	0	0	0	0	2	0
>k141_863954	432	0	0	0	0	0	0	0	0	0	0	0	0	0	2	0	0	2	0	0	0	1	0	0	0	0	0	0	2	0	18	0	3	0	2	2
>k141_863975	372	1	0	0	0	0	0	0	0	0	0	0	0	1	0	0	0	0	0	0	0	2	0	0	0	0	0	0	0	4	0	0	5	0	0	0
>k141_865284	369	1	0	0	2	0	0	0	0	0	0	2	0	0	0	0	0	1	2	0	0	2	0	0	6	0	0	0	0	2	2	0	0	0	0	0
>k141_865474	369	2	0	0	0	0	0	2	0	0	0	0	0	0	0	2	0	0	0	0	0	0	3	0	0	0	0	0	0	1	2	0	0	0	0	2
>k141_865591	540	2	0	0	0	0	0	0	0	0	2	0	0	0	1	10	0	0	0	0	0	3	4	0	3	0	0	0	0	0	0	0	0	2	0	0
>k141_866828	417	1	0	0	0	0	0	1	0	0	2	3	0	1	1	19	0	2	0	0	0	7	0	0	5	0	0	0	0	1	2	0	0	2	0	6
>k141_867219	369	0	0	0	0	0	0	0	0	0	0	0	0	1	0	2	0	0	0	0	0	2	0	0	0	0	0	0	0	0	0	0	0	7	0	1
>k141_867236	1122	3	5	0	2	1	0	0	0	0	0	3	2	4	3	33	0	2	0	1	0	25	7	1	0	1	0	0	3	2	8	0	5	9	0	2
>k141_867390	333	0	0	0	0	0	0	0	0	0	0	0	0	0	0	2	0	1	0	0	0	2	0	0	0	0	0	0	0	0	0	0	0	0	0	0
>k141_867583	414	3	0	0	2	0	0	2	3	0	0	0	0	0	0	1	1	2	1	0	0	0	6	1	6	0	2	0	0	0	2	0	0	8	0	0
>k141_867994	192	0	0	0	0	0	0	0	0	0	0	0	0	0	0	0	0	0	0	0	0	3	0	0	0	0	0	0	0	0	0	0	0	2	0	0
>k141_869112	447	0	0	0	0	0	0	0	0	0	0	0	0	0	0	7	0	0	0	0	0	6	0	0	0	0	0	0	0	0	0	0	0	2	0	0
>k141_869710	867	4	0	0	0	0	0	0	0	0	0	2	0	0	0	3	0	0	2	0	6	7	4	0	2	0	0	0	0	2	0	0	4	2	0	2
>k141_870233	579	0	0	0	0	0	0	0	0	0	0	0	1	0	12	4	0	0	0	0	0	6	0	0	0	0	1	0	0	2	0	0	0	15	0	2
>k141_870368	468	1	2	0	0	0	0	0	0	0	0	1	0	0	0	2	0	0	0	2	0	0	0	0	0	0	0	0	0	0	0	0	0	2	0	3
>k141_870369	546	0	0	0	0	0	0	0	0	0	0	0	0	1	5	9	0	0	0	0	0	0	0	0	0	0	0	0	0	0	0	0	0	0	0	0
>k141_870692	957	19	193	85	99	105	45	70	99	135	165	222	176	144	650	7	293	343	158	360	262	4	56	91	132	321	208	151	437	268	402	83	255	201	333	73
>k141_870774	305	0	0	0	0	0	0	0	0	0	0	0	0	0	0	0	0	0	0	0	0	4	0	0	0	0	0	0	0	2	0	0	0	0	0	0
>k141_871161	654	0	1	0	2	0	2	0	0	0	0	0	0	0	0	0	1	1	2	0	0	6	8	4	2	0	0	0	0	0	0	0	2	1	0	1
>k141_871806	561	1	0	0	4	3	0	0	4	0	5	4	0	0	2	5	0	4	0	2	0	8	6	0	2	0	0	1	0	1	2	0	4	0	0	2
>k141_871899	750	0	1	0	0	0	0	0	0	0	0	2	0	0	0	1	4	2	2	5	3	0	17	0	5	8	4	5	6	5	10	3	1	6	2	0
>k141_873067	435	0	0	0	0	2	0	8	0	0	0	7	0	0	0	0	0	0	0	0	0	0	1	0	0	0	0	0	0	0	0	0	0	0	0	0
>k141_873284	366	1	6	0	0	1	0	1	0	1	1	0	6	0	6	0	0	0	0	0	0	2	0	1	2	0	0	0	0	1	2	0	0	0	0	0
>k141_874198	705	0	0	0	0	0	0	0	0	0	0	0	0	2	0	4	0	0	0	0	0	0	0	0	0	0	0	0	0	0	0	0	0	31	0	0
>k141_874377	801	0	0	0	0	0	0	0	0	0	0	0	0	3	0	7	1	2	2	0	0	11	6	3	6	0	0	0	1	7	0	0	2	2	0	0
>k141_874558	1062	3	0	0	0	0	0	1	0	0	0	0	0	0	0	10	6	2	2	2	21	16	10	2	13	0	0	2	4	19	3	0	7	2	0	2
>k141_875338	2097	0	7	20	13	32	7	19	2	19	0	6	6	6	32	0	0	8	0	4	2	0	0	0	0	6	0	1	1	0	2	0	0	6	13	2
>k141_876220	354	0	0	0	0	2	0	0	0	0	0	1	0	0	1	1	0	2	0	0	0	2	1	0	0	0	0	0	0	0	0	0	0	5	0	0
>k141_876478	297	0	0	0	1	0	0	0	0	0	0	0	0	1	4	5	0	0	0	0	0	0	0	0	0	0	0	0	0	0	0	0	0	0	0	0
>k141_876678	405	2	2	0	0	0	0	2	2	0	0	0	0	0	0	0	0	0	0	0	0	0	0	0	0	0	0	0	2	0	0	0	0	0	1	0
>k141_876759	417	0	0	0	0	0	0	0	0	0	2	2	0	0	0	0	0	5	0	0	0	0	0	0	0	0	0	0	0	2	0	0	2	0	0	0
>k141_877593	324	0	0	0	0	0	0	0	0	0	0	0	0	0	0	3	0	0	0	0	0	7	0	0	0	0	0	0	0	0	0	0	0	0	0	0
>k141_878233	402	0	0	0	0	0	0	0	0	0	0	2	0	0	0	0	0	0	0	2	0	1	1	3	0	0	0	0	2	0	2	0	2	0	0	0
>k141_878391	471	1	0	0	0	0	0	0	0	0	3	0	0	0	0	0	0	0	1	0	0	6	0	0	0	0	0	0	0	3	0	0	2	0	0	2
>k141_878753	1368	4	8	1	0	2	0	0	2	1	6	10	1	2	7	4	0	9	6	6	1	1	2	4	8	4	6	2	5	2	21	2	6	1	9	7
>k141_878827	759	0	0	0	0	0	0	0	0	0	0	0	0	2	0	2	0	0	0	0	0	1	0	0	0	0	0	0	0	1	0	0	0	16	0	0
>k141_879966	330	2	0	0	0	0	0	0	0	0	0	0	0	0	2	0	0	0	0	0	0	2	4	4	0	0	0	0	0	0	0	0	0	0	0	0
>k141_881273	561	0	0	0	0	0	0	0	0	0	2	0	0	0	0	0	0	0	0	0	0	0	0	0	0	0	2	4	4	0	0	0	0	6	0	0
>k141_882265	933	8	0	0	2	0	0	0	1	0	5	1	0	9	8	11	0	0	0	0	2	8	0	1	1	0	0	0	0	1	0	0	1	14	1	5
>k141_882583	396	0	0	0	0	0	0	0	0	0	4	2	0	0	0	0	0	0	0	0	0	0	2	0	0	0	0	0	0	0	0	0	0	0	0	0
>k141_882955	303	0	0	0	0	0	0	0	0	0	0	0	0	0	0	0	0	0	0	0	0	0	0	0	0	0	2	0	0	0	0	0	0	4	0	1
>k141_883177	249	0	0	0	0	0	0	0	0	0	0	0	0	0	0	0	0	0	0	0	0	0	0	0	0	0	0	0	0	0	0	0	0	2	0	0
>k141_883599	447	0	0	0	0	0	0	0	0	0	2	0	0	2	0	0	2	2	0	0	0	0	6	2	0	2	2	0	1	0	0	0	0	0	0	0
>k141_884285	501	6	2	0	0	1	0	0	2	0	0	3	0	4	0	8	0	0	0	0	0	0	0	0	0	0	0	0	0	1	0	0	0	4	0	0
>k141_885162	408	0	0	0	0	0	0	0	0	0	0	0	0	0	2	0	0	0	0	0	0	0	2	0	0	0	0	0	0	0	2	0	2	4	0	0
>k141_885567	450	8	47	44	37	34	19	41	22	44	13	49	53	46	61	1	14	19	11	18	6	0	3	14	11	17	6	10	3	26	31	18	32	5	81	18
>k141_885770	540	2	0	0	0	0	2	0	0	0	0	0	4	6	0	23	0	0	0	0	0	40	11	0	2	0	0	0	0	23	0	0	0	3	0	0
>k141_886146	324	0	0	0	0	0	0	0	0	0	0	0	0	0	0	0	0	2	0	0	0	0	0	0	1	0	0	0	4	0	1	0	1	0	0	0
>k141_886593	417	0	0	0	0	0	0	0	0	0	0	0	0	0	0	0	0	0	0	0	0	8	0	0	0	0	0	0	0	0	0	0	0	2	0	0
>k141_887131	498	0	0	0	0	0	0	0	0	0	0	1	0	0	0	0	2	2	2	0	0	0	0	0	3	0	0	0	2	6	0	0	2	2	0	0
>k141_887250	594	6	0	0	0	0	0	0	0	0	0	0	0	0	0	4	0	0	0	0	0	8	0	0	0	0	0	0	0	0	0	0	2	0	0	0
>k141_887893	594	0	0	0	0	0	0	0	5	0	0	4	0	2	0	2	0	0	0	0	0	0	2	0	0	0	0	0	0	2	0	0	2	6	0	0
>k141_888006	1116	9	10	5	4	9	0	2	3	10	10	12	1	4	19	8	4	18	4	3	5	21	8	5	10	7	2	3	12	11	29	10	19	20	21	6
>k141_888120	2617	11	13	9	30	30	8	4	2	8	12	26	9	15	117	0	6	32	12	34	4	1	12	10	12	29	14	13	16	10	19	4	18	4	29	4
>k141_888185	438	0	0	0	0	0	0	0	0	0	0	0	0	0	0	0	0	0	0	0	0	3	0	0	0	0	0	0	0	0	2	0	0	0	0	2
>k141_888510	426	0	0	0	0	0	0	0	0	0	0	0	0	2	0	2	0	0	0	0	1	9	0	2	0	0	0	0	0	2	0	0	0	0	0	0
>k141_888763	357	0	0	0	0	0	0	0	0	0	0	0	0	0	0	0	0	0	0	0	0	0	3	0	1	0	0	0	0	1	2	0	1	0	0	0
>k141_889243	309	0	0	0	0	0	0	0	0	0	1	0	0	0	0	0	0	0	0	0	0	0	0	0	0	0	0	0	0	2	0	0	0	9	0	0
>k141_890014	345	0	0	2	0	2	0	2	0	0	0	0	0	0	0	0	2	0	0	0	0	0	0	2	0	0	0	0	0	0	0	0	0	0	0	0
>k141_890117	354	0	0	0	0	0	0	0	0	0	0	0	0	0	0	6	0	0	0	0	0	0	0	0	0	0	0	0	0	0	0	0	0	0	0	0
>k141_890819	360	0	0	0	0	0	0	0	0	0	0	0	0	0	0	4	0	0	0	0	0	0	0	0	4	0	0	0	0	0	0	0	0	1	0	2
>k141_891181	348	2	2	0	0	0	0	0	1	0	0	0	0	0	0	1	0	0	0	0	0	0	0	0	0	0	0	0	2	0	0	0	0	2	0	1
>k141_891645	408	0	2	0	0	2	0	2	0	0	2	0	0	0	0	4	0	0	0	0	0	0	0	2	0	0	0	0	0	0	0	0	0	10	0	0
>k141_892617	339	0	0	0	0	0	0	0	0	0	0	0	0	0	0	4	0	0	0	0	0	0	4	0	3	0	0	0	0	0	1	0	0	1	0	0
>k141_893043	369	0	0	0	0	0	0	0	0	0	0	0	0	0	4	8	0	3	0	2	0	0	0	0	0	0	0	0	0	0	0	0	0	0	0	0
>k141_893230	348	0	0	0	0	0	0	0	0	0	0	0	0	0	0	0	0	1	0	0	1	4	0	0	0	0	0	0	1	0	0	0	0	2	0	0
>k141_894565	843	1	0	0	0	0	0	0	0	0	2	0	0	0	2	4	0	0	0	0	0	16	2	0	0	0	0	0	0	0	2	0	2	6	2	3
>k141_895956	339	0	0	0	1	0	0	0	0	0	0	2	0	2	0	0	0	0	0	0	0	5	0	0	2	0	0	0	0	0	0	0	0	2	0	0
>k141_896056	399	2	0	2	0	0	0	2	0	0	0	0	0	0	0	0	0	0	0	4	0	0	0	0	2	0	0	0	1	4	0	0	1	2	0	0
>k141_896132	333	0	0	0	2	0	0	0	0	0	1	0	0	0	0	0	0	1	0	0	0	0	0	2	0	0	0	0	0	0	0	0	0	0	0	0
>k141_896450	462	2	0	0	0	0	0	0	0	0	0	1	2	0	0	2	0	0	0	0	0	1	0	0	0	0	0	0	0	0	0	0	0	0	0	0
>k141_896712	363	0	2	0	0	0	0	0	0	0	1	0	0	0	0	0	0	0	0	0	0	0	0	0	0	0	2	0	0	0	0	0	0	0	0	0
>k141_897072	525	0	0	0	0	0	0	0	0	0	0	1	0	0	0	1	2	0	0	0	0	1	0	3	2	0	0	2	0	0	0	0	2	0	0	0
>k141_897297	396	0	2	0	0	0	0	0	0	0	0	0	0	0	2	0	0	2	0	0	0	0	0	0	3	0	0	0	2	0	0	0	6	0	0	0
>k141_897379	987	0	0	2	3	2	2	2	0	0	6	3	0	0	0	0	0	0	0	0	0	0	0	0	0	0	0	0	0	0	0	0	4	0	0	0
>k141_897556	255	2	0	2	0	1	0	0	0	0	0	0	0	3	0	0	0	0	0	0	0	0	2	0	0	0	0	0	0	0	2	0	0	4	0	0
>k141_897665	411	2	0	0	0	0	0	0	0	3	2	0	0	0	0	0	0	0	0	0	0	0	0	0	0	0	0	0	1	0	0	0	0	2	0	0
>k141_897870	276	0	0	0	0	0	0	0	0	0	0	0	0	0	0	0	0	0	0	0	0	0	0	0	0	0	0	0	2	0	0	0	1	0	0	0
>k141_898977	408	0	0	0	0	0	0	0	0	0	0	0	0	0	0	0	0	0	0	0	0	0	0	0	0	0	0	0	1	2	2	0	0	2	4	0
>k141_899259	300	0	0	0	0	0	0	0	0	0	0	1	0	1	1	1	5	3	5	4	5	0	3	3	4	0	3	9	0	4	6	4	1	0	1	0
>k141_901650	471	0	0	0	0	0	0	0	0	0	0	0	0	0	0	3	0	0	0	0	0	12	3	0	0	2	0	0	1	2	0	2	4	11	2	1
>k141_903028	453	0	0	0	0	0	0	0	0	0	0	0	0	0	11	4	0	0	0	0	0	2	0	0	0	0	0	0	0	0	0	0	0	3	0	0
>k141_903190	354	0	0	0	0	0	0	0	0	1	0	0	0	0	0	0	0	0	0	0	0	6	0	0	0	2	0	0	0	0	0	1	0	0	0	0
>k141_903551	303	1	0	0	0	0	0	0	0	0	0	0	2	0	0	1	0	2	2	0	0	0	5	0	5	0	0	0	0	1	0	0	0	0	0	2
>k141_903793	462	5	10	7	7	3	10	13	2	10	17	33	33	16	25	0	19	40	8	31	13	0	0	22	11	11	13	68	16	9	21	12	17	2	43	13
>k141_904004	396	0	0	0	0	0	0	0	0	0	0	0	0	0	0	0	0	0	0	0	1	0	0	0	1	0	0	2	2	0	1	0	2	0	0	0
>k141_904660	637	0	2	0	0	0	0	0	0	0	0	2	0	1	0	0	0	0	0	0	0	4	4	0	0	0	0	0	0	0	4	0	0	0	1	0
>k141_905115	780	2	0	0	0	2	0	0	0	0	0	0	0	4	28	2	0	0	0	0	0	0	0	0	0	0	0	0	2	0	0	0	0	15	0	0
>k141_905198	519	0	0	0	0	0	0	0	0	0	0	0	0	0	3	8	0	0	0	0	2	14	0	0	0	0	0	0	0	0	0	0	0	8	0	3
>k141_905774	432	0	0	0	0	2	0	0	0	0	0	0	0	0	0	0	0	0	0	0	0	3	0	0	3	0	0	0	0	0	0	0	0	1	0	1
>k141_905971	2319	25	4	2	14	0	2	18	4	0	6	4	0	9	6	4	2	4	9	2	0	12	6	0	0	0	2	0	0	4	3	0	0	11	0	4
>k141_906354	351	2	0	0	0	0	0	0	0	0	0	0	0	0	0	0	0	4	0	0	0	1	8	0	2	0	0	0	0	2	0	0	4	0	0	0
>k141_906388	501	0	0	0	0	2	0	0	0	0	0	0	0	3	1	2	0	0	0	1	0	4	1	0	1	0	0	0	2	1	0	0	1	1	0	0
>k141_907422	339	4	0	0	0	0	0	2	0	0	0	0	0	2	2	1	0	0	0	0	0	2	0	0	0	0	0	0	0	0	0	0	0	4	0	1
>k141_907511	312	2	0	0	0	0	0	0	0	0	0	1	0	0	3	0	0	0	0	0	0	0	3	0	0	0	0	0	0	0	2	0	0	1	0	0
>k141_907538	333	0	0	0	0	0	0	0	0	0	0	2	0	0	0	1	0	2	0	0	2	6	0	0	0	0	0	0	0	0	0	0	0	1	0	2
>k141_907939	405	1	0	0	2	2	0	2	2	0	0	2	0	6	0	0	0	0	0	1	0	7	4	0	2	0	0	0	0	0	0	0	0	7	2	0
>k141_908545	717	0	0	2	0	0	3	0	0	0	3	10	0	0	0	0	0	0	2	0	0	0	2	6	0	2	0	4	0	0	0	0	3	0	0	0
>k141_908559	873	3	0	0	2	0	0	0	0	0	6	2	0	2	2	2	0	0	0	0	1	1	6	0	0	0	0	0	2	2	0	0	2	9	0	5
>k141_909514	321	0	0	0	0	0	0	0	0	0	0	0	0	1	2	0	0	0	0	0	0	0	1	2	2	0	0	0	0	0	0	0	0	0	0	0
>k141_909648	306	0	0	0	0	0	0	0	2	0	1	1	0	0	0	2	0	0	0	0	0	0	0	0	0	0	0	0	0	2	0	0	0	0	0	0
>k141_910145	442	0	0	0	0	2	0	0	0	0	0	0	0	2	3	10	0	0	0	0	0	0	0	0	0	0	0	0	0	1	0	0	0	3	0	2
>k141_910293	1197	2	0	0	0	0	0	0	4	0	6	0	0	0	2	0	2	0	0	0	0	0	0	0	0	0	2	0	0	0	6	8	4	0	6	0
>k141_910346	702	2	0	0	2	0	0	2	0	0	1	0	0	0	0	4	2	1	2	0	0	2	12	2	4	0	0	0	3	0	0	0	12	0	0	0
>k141_911178	231	0	0	0	0	0	0	0	0	0	0	4	0	0	7	0	0	0	0	0	0	0	1	0	0	0	0	0	0	0	0	0	0	0	0	0
>k141_912046	468	2	0	0	0	0	0	0	0	0	2	0	0	0	0	4	0	0	2	0	0	0	0	0	0	0	0	0	0	0	0	0	0	0	0	0
>k141_912118	525	0	0	0	0	0	0	0	0	0	0	0	0	4	3	1	2	0	0	0	0	0	0	0	0	0	0	0	0	0	0	0	0	0	0	0
>k141_913624	306	0	0	0	0	0	0	0	0	0	0	0	0	0	0	0	0	0	0	0	0	0	2	0	0	0	0	0	0	7	0	0	0	3	0	0
>k141_913865	840	0	0	0	0	0	0	0	0	0	2	8	0	0	2	12	0	1	4	0	0	8	2	0	6	0	0	0	0	0	2	0	2	8	0	2
>k141_913886	318	0	0	0	0	0	0	0	0	0	0	0	0	0	0	2	0	0	0	0	0	4	0	0	0	0	0	0	0	0	0	0	0	0	0	0
>k141_914350	594	0	0	1	0	2	0	0	0	0	0	2	1	2	1	2	0	0	0	0	0	4	0	0	0	1	0	0	1	0	2	0	0	0	0	0
>k141_914931	318	0	0	0	0	0	0	0	0	0	0	0	0	0	0	1	0	0	0	0	0	6	0	0	0	0	0	0	0	0	1	0	1	2	0	0
>k141_915204	483	0	0	0	0	0	0	0	0	0	0	0	0	0	0	0	0	0	3	0	0	0	9	0	3	0	0	0	1	4	0	0	0	0	0	0
>k141_915466	807	0	0	1	0	0	0	0	0	0	0	1	0	0	2	0	0	0	0	0	0	0	3	1	0	0	0	8	0	2	6	1	3	0	0	0
>k141_915840	327	0	0	0	0	0	0	0	0	0	0	0	0	0	0	0	0	0	0	0	0	0	4	0	4	0	0	0	0	0	0	0	0	0	0	0
>k141_915995	957	0	0	0	0	0	0	0	0	0	7	0	0	0	4	0	0	0	0	0	4	0	2	0	0	0	0	0	2	6	2	0	2	0	2	0
>k141_916141	339	4	0	0	2	0	0	0	0	0	0	0	0	1	0	0	0	0	0	0	0	0	0	0	0	0	0	0	0	0	0	0	0	0	0	0
>k141_916403	585	2	2	0	0	0	0	0	0	0	0	0	0	0	2	1	4	1	0	0	4	3	0	0	0	0	0	0	1	2	0	0	0	0	0	0
>k141_916414	510	0	0	0	0	0	0	0	0	0	2	2	0	0	2	0	0	0	0	0	0	0	0	0	0	0	0	0	2	0	2	0	4	0	0	0
>k141_917477	1977	0	0	0	0	0	0	0	0	0	0	0	0	0	0	0	0	0	2	0	0	7	144	8	5	0	0	0	0	0	0	0	0	0	0	0
>k141_918031	285	2	0	0	1	1	2	0	0	0	0	1	2	1	0	0	0	0	0	2	0	1	0	1	0	2	0	0	1	0	0	0	2	2	2	0
>k141_919492	306	0	0	0	0	0	0	0	0	0	0	0	0	0	0	0	2	0	0	0	0	0	0	0	0	0	1	0	0	0	2	2	2	0	0	0
>k141_919873	495	62	143	197	148	167	123	262	116	167	143	230	232	243	275	0	244	352	165	366	263	7	37	123	107	238	549	90	374	185	378	130	403	476	283	98
>k141_919875	402	0	0	0	0	0	0	0	0	0	0	0	0	0	0	10	0	0	2	0	0	0	0	0	0	0	0	0	0	0	0	0	0	1	0	0
>k141_919878	333	1	0	0	0	0	0	0	0	0	0	0	2	2	0	3	0	0	0	0	0	2	0	0	0	0	0	0	0	0	0	0	0	0	0	0
>k141_920647	1068	0	0	0	0	0	0	0	7	0	2	2	0	2	0	0	0	0	0	0	0	0	10	2	2	0	0	0	0	10	1	0	9	2	0	0
>k141_920869	864	0	0	0	0	0	0	0	1	0	0	2	2	0	0	8	0	0	1	0	0	3	12	5	3	2	0	2	2	0	4	0	1	0	2	0
>k141_921249	402	0	0	0	0	0	0	0	0	0	0	0	0	0	0	4	0	0	0	0	0	11	0	0	0	0	0	0	0	0	0	0	0	0	0	0
>k141_921265	447	0	0	0	0	0	0	0	0	0	0	0	0	2	6	0	0	0	0	0	0	2	0	0	0	0	0	0	0	1	0	0	0	7	0	0
>k141_922667	306	0	0	0	0	0	0	0	0	0	0	0	0	0	0	0	0	0	0	0	0	0	0	2	0	2	0	0	0	0	0	0	0	0	0	0
>k141_922964	399	0	0	0	0	1	0	1	0	0	0	0	0	0	3	3	0	0	0	0	0	4	0	0	1	0	0	0	0	0	0	0	0	0	0	0
>k141_923592	366	0	0	0	0	0	0	0	0	0	0	0	0	1	0	0	0	0	0	0	0	2	6	0	1	0	0	0	0	1	0	0	1	0	0	0
>k141_924169	720	0	0	0	0	0	0	0	0	0	1	0	0	0	6	3	2	0	2	0	2	0	4	0	1	0	0	0	0	2	7	0	0	7	0	2
>k141_924582	492	4	3	0	1	2	0	2	0	0	2	0	0	2	3	1	0	2	1	0	0	7	2	0	0	0	0	0	0	0	0	0	2	4	0	2
>k141_925451	279	0	0	0	0	0	0	0	0	0	0	0	0	0	0	0	0	0	0	0	0	0	0	1	0	0	0	0	0	1	0	0	0	4	0	0
>k141_925589	876	0	0	0	0	0	0	0	0	0	0	0	0	0	0	4	0	0	0	0	0	23	2	0	0	0	0	0	0	0	0	0	1	0	0	2
>k141_925715	549	0	0	0	0	0	0	0	0	1	2	4	2	2	0	0	2	0	0	2	0	0	0	0	0	2	0	0	0	0	0	0	2	2	0	0
>k141_925913	648	0	0	0	0	0	0	0	0	0	0	0	0	0	0	3	0	0	0	0	0	13	0	0	0	0	0	0	0	0	0	0	0	2	0	2
>k141_926286	579	0	0	0	0	0	0	0	0	0	2	0	0	0	0	4	0	0	0	0	2	0	2	2	2	0	0	0	0	3	0	0	2	7	1	2
>k141_926943	534	0	0	0	0	0	0	0	0	0	0	0	0	0	0	2	2	0	0	0	0	7	0	0	0	0	0	0	0	0	0	0	0	0	0	0
>k141_927928	2193	2	29	9	49	45	14	3	2	32	4	3	5	6	2	3	0	8	3	3	0	5	5	2	0	32	5	0	0	1	4	0	4	1	36	0
>k141_928760	369	0	0	2	0	0	0	0	0	0	2	0	0	0	0	0	0	0	0	0	0	0	1	0	0	2	0	0	0	0	0	0	0	0	0	0
>k141_929238	549	1	0	0	0	0	0	0	0	0	0	1	0	5	6	3	0	2	0	2	2	4	1	0	2	0	0	0	0	0	0	0	0	3	0	0
>k141_929535	276	0	0	0	0	0	0	0	0	0	0	0	0	0	1	0	0	0	0	0	0	1	0	0	0	0	0	0	0	0	0	0	0	2	0	0
>k141_930708	306	0	0	0	0	0	0	0	0	0	0	0	0	0	0	0	0	0	4	0	0	0	0	0	0	0	0	0	0	0	0	0	0	2	0	0
>k141_931550	321	0	0	0	0	0	0	0	0	0	0	0	0	0	0	0	0	0	0	0	0	0	3	0	0	0	0	0	0	2	0	0	0	2	0	0
>k141_931598	450	3	2	0	1	0	0	0	0	0	0	0	0	2	2	0	2	0	0	0	0	0	2	0	2	0	0	0	5	0	1	0	0	2	2	2
>k141_932718	339	0	0	0	0	0	0	0	0	0	0	0	0	0	1	0	0	0	0	0	0	0	0	0	2	0	0	0	0	0	0	0	0	5	0	0
>k141_934035	519	0	0	0	0	0	0	0	0	0	0	2	0	0	0	0	0	0	0	0	0	2	0	3	0	2	0	0	0	0	0	0	0	2	0	1
>k141_935126	315	0	0	0	0	0	0	0	0	0	0	0	0	0	0	2	0	0	0	0	0	2	0	0	0	0	0	0	0	1	3	0	0	2	0	0
>k141_936967	435	0	0	0	0	0	0	0	2	0	0	0	0	0	0	0	0	0	0	0	0	0	6	0	2	0	0	0	0	0	0	0	1	0	0	0
>k141_937099	321	1	0	0	0	0	0	0	0	0	0	2	0	2	0	0	5	4	0	0	4	0	2	2	2	3	0	2	0	0	1	0	1	0	0	0
>k141_937789	459	2	0	0	4	0	2	0	0	0	0	0	0	3	0	2	0	2	0	0	0	9	1	0	0	0	0	0	0	0	0	0	0	0	0	0
>k141_937809	600	0	0	0	0	0	0	0	0	0	0	1	0	0	2	0	3	0	0	0	0	2	5	0	0	0	0	0	4	2	2	0	0	2	0	0
>k141_938747	294	2	0	0	0	0	0	2	0	0	0	0	0	0	2	0	0	0	0	0	0	0	0	0	0	0	0	0	0	0	0	0	0	2	0	0
>k141_939521	330	2	0	0	0	0	0	0	2	0	0	2	0	0	4	0	0	0	0	0	0	0	1	0	0	2	0	0	0	0	0	0	0	0	0	0
>k141_941155	510	3	0	2	0	0	0	0	0	0	0	0	0	0	0	0	0	0	0	0	6	4	0	0	0	0	0	0	0	2	0	2	2	0	0	0
>k141_942308	453	0	0	0	1	0	0	0	0	0	0	0	0	0	0	0	0	0	2	0	0	0	0	0	0	2	1	1	4	1	6	0	1	0	2	0
>k141_942778	357	0	0	0	0	0	0	0	0	0	0	2	0	2	2	0	0	0	0	0	0	0	2	0	0	0	0	0	0	0	0	0	0	0	0	0
>k141_942842	324	0	2	1	2	4	4	0	0	0	0	0	0	0	0	0	0	2	0	2	0	2	0	2	0	0	0	0	0	0	1	0	0	0	3	0
>k141_943435	351	0	3	0	0	0	0	0	0	0	0	0	0	0	0	2	0	0	0	0	0	7	0	0	1	0	0	0	0	0	1	0	0	1	0	2
>k141_943537	438	0	0	0	0	0	0	0	0	0	0	0	0	0	0	1	0	0	0	0	0	0	2	2	2	0	0	0	2	2	1	0	0	0	0	0
>k141_943541	333	0	0	0	0	0	0	0	0	0	0	0	0	0	0	5	0	0	0	0	0	11	0	0	0	0	0	0	0	0	0	0	0	0	0	0
>k141_943735	411	0	0	0	0	1	0	2	0	0	0	2	0	0	2	2	0	2	0	1	0	1	0	0	0	0	0	0	0	2	0	0	0	6	0	0
>k141_944571	609	0	0	0	0	0	0	0	0	0	0	0	0	0	0	3	1	0	0	0	0	0	0	0	0	0	0	0	0	0	0	0	0	6	0	2
>k141_945283	1791	1	0	0	0	2	0	0	0	0	0	0	0	18	14	24	0	6	0	0	4	12	0	2	2	0	2	0	0	2	0	0	0	31	0	0
>k141_945292	594	0	0	0	0	0	0	0	0	0	0	0	2	4	1	3	0	0	0	0	0	6	4	0	0	0	0	0	0	1	5	0	2	0	0	0
>k141_945477	2106	4	28	8	9	39	2	14	0	55	2	2	4	3	26	4	0	12	3	6	1	2	1	4	2	12	2	0	3	0	7	0	4	1	8	4
>k141_945989	570	2	2	0	2	0	0	0	0	0	0	0	0	0	0	2	0	0	1	0	0	4	0	0	0	0	0	0	0	0	0	0	2	0	0	0
>k141_946019	294	0	0	2	0	0	0	0	0	0	0	0	0	0	0	0	2	0	0	1	0	0	0	0	0	0	0	0	0	0	0	0	0	0	0	0
>k141_946944	480	0	0	0	0	0	0	0	0	0	0	0	0	2	1	3	0	0	0	0	0	2	4	0	2	0	0	0	0	0	0	0	0	0	0	2
>k141_948323	873	2	0	0	0	0	0	3	3	0	4	1	2	0	6	8	0	0	0	0	2	7	4	0	0	0	0	0	0	0	3	0	0	13	0	0
>k141_949314	204	0	0	0	0	0	0	0	0	0	0	0	0	0	0	0	0	0	0	0	0	8	0	0	0	0	0	0	0	0	0	0	0	0	0	0
>k141_950011	342	0	0	0	0	0	0	0	0	0	0	0	0	0	0	0	0	0	0	0	0	2	0	0	0	0	0	0	0	2	0	0	0	0	0	0
>k141_950012	411	0	0	0	2	0	0	0	0	0	4	4	0	0	0	0	0	0	0	0	0	0	0	0	2	0	0	0	0	0	0	0	0	0	0	0
>k141_951537	1152	2	0	0	0	0	0	0	0	0	0	0	0	1	0	9	0	0	2	0	1	15	2	0	1	0	0	0	2	2	0	2	3	4	0	0
>k141_951720	330	0	0	0	0	0	0	0	0	0	0	0	0	0	0	0	0	0	0	0	0	0	2	0	3	0	0	0	0	0	0	0	0	0	0	0
>k141_951726	492	0	0	0	0	0	0	0	0	0	0	2	1	1	0	7	0	0	0	0	0	1	0	0	0	0	0	0	0	2	0	0	0	0	0	0
>k141_951794	306	0	0	0	0	0	0	2	0	0	0	0	0	0	0	0	0	0	0	0	0	0	5	0	1	0	0	0	0	0	0	2	1	0	0	0
>k141_951936	801	0	0	0	0	2	0	2	0	0	0	0	0	9	2	16	0	0	0	0	4	6	0	0	0	0	0	0	0	0	0	0	0	7	2	4
>k141_952127	420	0	0	0	0	0	0	0	0	0	0	0	0	2	2	1	0	0	0	0	0	4	0	0	0	0	0	0	0	1	2	0	2	1	0	0
>k141_953000	366	0	0	0	0	2	1	0	2	0	0	2	3	3	0	9	0	3	1	1	0	4	4	2	1	0	1	0	0	1	1	0	0	0	0	0
>k141_954024	1035	8	2	0	0	0	0	3	0	0	0	0	0	0	4	15	2	0	0	0	0	22	0	0	0	0	0	0	0	1	0	0	2	4	0	2
>k141_954923	942	8	0	0	0	0	0	0	1	0	0	0	0	0	0	0	2	0	0	0	1	2	3	0	0	0	0	0	0	9	2	0	2	6	0	0
>k141_955455	339	0	0	0	0	0	0	0	0	0	0	0	0	0	0	0	0	0	0	0	0	7	0	0	0	0	0	0	2	3	0	0	1	2	0	2
>k141_955600	588	0	0	0	0	0	0	2	0	0	1	2	1	4	2	0	0	0	1	0	0	0	0	0	3	0	0	0	0	2	0	0	0	2	0	0
>k141_956015	3300	0	2	0	0	6	0	0	49	4	55	57	2	0	14	2	0	2	8	4	0	0	22	10	0	0	6	0	4	0	0	0	4	0	0	4
>k141_956193	390	0	0	2	0	0	0	0	0	0	0	2	0	0	0	2	0	0	0	0	0	0	2	1	0	0	0	0	0	0	0	0	0	0	0	2
>k141_956388	360	0	0	0	0	0	0	0	0	0	0	0	0	0	0	0	0	0	0	0	0	1	0	0	2	0	0	0	0	0	2	0	0	0	0	0
>k141_956436	402	4	0	0	0	0	0	0	0	0	5	2	0	3	0	2	0	0	0	0	0	2	0	0	0	0	0	0	0	1	0	0	2	0	0	0
>k141_956632	537	0	0	0	0	0	0	0	1	0	0	1	0	1	0	7	4	0	1	0	0	3	10	0	2	0	0	0	0	4	0	0	8	0	0	0
>k141_957522	806	2	0	0	0	0	0	2	0	0	0	0	0	0	5	2	0	0	0	0	0	0	7	1	2	0	0	0	0	2	0	0	2	4	0	0
>k141_958164	423	0	0	0	0	0	0	0	0	0	0	0	0	0	0	0	0	0	0	0	0	1	0	0	5	0	0	0	4	0	2	0	0	0	0	1
>k141_958186	891	0	0	0	0	0	1	0	0	0	10	12	0	0	0	0	0	0	2	0	0	0	0	0	0	0	0	0	0	0	0	0	0	0	0	0
>k141_958309	342	2	0	0	0	0	0	0	0	0	0	0	0	0	0	0	0	0	0	0	0	5	0	0	0	0	0	0	0	0	0	0	0	0	0	0
>k141_958335	531	39	0	0	8	4	0	3	2	0	0	0	0	9	0	5	0	0	0	0	0	3	0	0	0	0	0	0	0	2	0	0	1	6	0	2
>k141_958351	318	0	0	0	0	0	0	0	0	0	0	0	0	0	0	6	0	0	0	0	0	0	0	0	0	0	0	0	0	2	2	0	1	0	0	0
>k141_958511	438	0	0	0	0	1	0	0	0	0	2	0	0	0	1	1	0	0	0	0	0	6	0	0	0	0	0	0	0	0	4	0	0	2	1	0
>k141_961115	354	0	0	0	0	0	0	0	0	0	0	0	0	0	0	2	0	0	0	0	0	3	0	0	0	0	0	0	0	0	4	0	0	0	0	0
>k141_961682	417	0	0	0	0	0	0	0	0	0	0	0	0	0	0	2	0	0	0	0	0	2	1	0	0	0	0	0	0	4	0	0	0	0	0	0
>k141_962088	195	0	0	0	0	0	0	0	0	0	0	0	0	0	0	1	0	2	0	2	0	0	1	0	0	2	0	0	0	0	0	0	0	0	0	0
>k141_963241	3868	3	35	3	1	16	2	11	5	11	18	24	4	9	274	0	0	0	1	3	2	5	0	0	1	3	2	0	3	1	8	4	1	19	0	3
>k141_964275	315	0	0	0	0	0	0	0	0	0	0	0	0	0	3	2	0	0	0	0	0	0	0	0	0	0	0	0	0	0	0	0	0	0	0	0
>k141_967927	1875	58	4	0	4	4	0	6	7	0	7	4	2	18	0	36	2	4	0	0	0	5	0	0	2	0	0	0	0	27	0	0	7	6	0	0
>k141_968621	810	0	0	0	0	0	0	0	0	0	0	0	0	2	0	0	2	0	2	0	0	12	4	0	3	0	0	0	2	1	0	0	2	1	0	0
>k141_969383	357	0	0	0	0	0	0	0	0	0	0	0	0	0	0	0	0	0	0	0	0	6	0	0	0	0	0	0	0	0	2	0	0	1	0	0
>k141_970486	330	0	0	0	0	0	0	0	0	0	0	0	0	0	0	0	0	0	0	0	0	0	0	0	0	0	0	0	0	0	0	0	0	5	0	0
>k141_971096	309	3	2	0	0	0	0	0	0	0	0	0	0	0	0	0	0	0	0	0	0	0	0	0	0	0	0	0	0	0	0	0	0	6	0	1
>k141_971336	270	0	0	0	0	0	0	0	0	0	0	0	0	2	2	2	0	0	0	0	0	0	0	0	0	0	0	0	0	0	0	0	0	2	0	0
>k141_972427	767	0	0	0	0	0	0	0	0	0	0	0	0	0	0	0	0	0	0	0	0	0	38	4	0	0	0	0	0	0	0	0	0	0	0	0
>k141_972645	573	0	0	0	0	0	0	0	0	0	0	0	4	4	6	3	0	0	0	0	0	2	4	0	0	0	0	0	0	0	0	0	0	0	0	0
>k141_973569	414	0	0	0	0	0	0	0	0	0	0	0	0	0	0	1	0	0	0	0	0	6	0	0	7	0	0	0	0	2	0	0	2	0	0	0
>k141_974197	450	2	1	0	3	0	1	1	0	0	0	0	2	0	1	1	2	0	1	0	0	0	4	0	2	0	0	2	0	7	0	0	0	1	2	0
>k141_974650	306	0	0	0	0	0	0	0	0	0	0	0	0	0	0	4	0	0	0	0	0	3	0	0	0	0	0	0	0	0	0	0	0	2	0	0
>k141_975283	423	0	0	0	0	0	0	0	2	0	0	3	0	0	0	0	2	0	0	0	0	2	0	1	2	0	2	0	0	2	0	0	0	3	0	1
>k141_975460	807	0	0	0	2	0	2	0	0	0	2	0	0	0	0	0	4	0	7	0	0	0	0	0	0	0	0	1	2	7	0	0	3	2	0	0
>k141_975719	543	29	155	87	43	107	48	106	61	139	108	173	154	179	670	0	77	190	45	167	46	2	28	41	60	162	118	76	101	24	154	49	84	229	148	67
>k141_977367	279	0	0	0	0	0	0	1	0	0	0	0	0	0	0	1	0	0	0	0	0	3	0	0	0	0	0	0	0	0	0	0	0	1	0	0
>k141_979043	405	0	0	0	0	0	0	0	0	0	0	0	0	4	0	9	0	0	0	0	0	4	0	0	0	0	0	0	0	0	0	0	0	1	0	0
>k141_979847	288	0	0	0	0	0	0	0	0	0	0	0	0	0	0	4	0	0	0	0	0	4	0	0	0	0	0	0	0	0	0	0	1	2	0	0
>k141_981026	993	10	0	0	0	2	0	0	2	0	0	0	2	4	0	2	0	0	4	0	0	0	2	0	0	0	0	0	0	4	2	0	2	0	0	0
>k141_981125	303	0	0	1	0	0	0	0	0	0	0	0	0	0	2	0	0	0	0	0	0	0	0	1	0	0	0	1	0	2	4	0	0	0	0	0
>k141_981346	573	6	2	0	4	0	1	0	0	0	0	0	0	2	2	11	0	0	0	0	0	12	0	0	0	0	0	0	0	0	0	0	0	6	0	1
>k141_981389	432	2	0	0	2	0	2	0	0	2	0	6	0	0	0	0	0	0	0	0	0	0	0	0	4	0	0	0	0	0	0	0	0	0	0	0
>k141_981707	300	0	0	0	0	0	0	0	0	0	0	0	0	0	2	1	0	0	0	0	0	10	0	0	0	0	0	0	0	0	0	0	0	4	0	2
>k141_983376	387	0	0	0	0	0	0	0	0	4	0	0	0	0	0	0	0	2	0	7	0	0	0	0	0	0	0	0	0	0	0	0	0	0	0	0
>k141_985074	288	0	0	0	0	0	0	0	0	0	0	0	0	0	0	1	0	0	0	0	0	0	0	0	0	0	0	0	0	0	0	0	0	10	0	0
>k141_986091	579	0	0	0	0	0	0	0	0	0	0	0	0	0	0	0	0	0	0	0	0	0	0	0	0	0	0	0	0	0	0	0	0	18	0	2
>k141_986450	636	2	0	0	0	0	0	0	0	0	0	0	0	0	0	3	0	4	2	0	0	5	0	2	2	0	0	0	0	0	0	0	0	0	0	1
>k141_988792	924	4	0	0	2	0	0	0	0	0	0	2	0	0	0	4	4	3	4	0	0	6	12	4	2	0	0	2	0	0	0	0	0	0	0	0
>k141_988877	300	0	0	0	0	0	0	0	0	0	0	0	0	0	0	0	0	0	0	0	0	1	0	0	0	2	2	0	0	0	1	0	0	0	1	0
>k141_988917	1887	11	26	7	23	34	14	9	2	6	5	4	5	2	3	1	0	19	0	9	2	4	2	3	0	21	3	2	6	8	20	5	18	4	30	3
>k141_990400	219	0	0	0	0	0	0	0	3	0	0	1	0	0	0	0	0	0	2	0	0	0	2	0	1	0	0	0	0	0	0	0	4	0	0	1
>k141_990669	378	4	0	0	0	0	0	5	4	0	1	2	0	0	0	0	0	0	0	0	0	0	0	0	0	0	0	0	0	5	0	0	0	2	0	0
>k141_990924	342	0	0	0	0	0	0	0	0	0	0	0	0	0	0	0	0	0	0	0	2	0	1	0	1	0	0	0	0	0	0	0	1	0	0	0
>k141_991570	564	2	0	0	0	0	0	0	0	1	2	2	0	0	0	11	0	0	0	0	0	9	0	0	0	1	0	0	0	0	0	0	0	2	0	0
>k141_991617	288	0	0	0	0	0	0	0	0	0	0	0	0	0	0	0	1	0	0	0	0	1	0	0	4	0	0	0	0	0	0	0	0	0	0	0
>k141_992585	1746	4	2	0	0	4	0	0	2	0	2	4	0	7	4	9	2	2	2	0	0	5	4	2	23	0	0	0	0	1	0	0	12	0	0	2
>k141_993313	420	0	0	0	0	0	0	0	0	0	0	0	0	0	0	0	0	0	0	0	0	0	0	0	2	0	0	0	0	0	2	3	0	0	0	0
>k141_993329	789	0	0	0	0	0	0	0	0	0	0	0	0	0	1	0	0	0	2	0	4	0	8	0	5	0	0	0	0	0	0	0	4	1	0	0
>k141_994074	411	0	0	0	0	0	0	0	0	0	0	0	0	0	3	0	0	0	0	0	0	2	0	0	0	0	0	0	0	0	0	0	0	3	0	0
>k141_994639	582	0	0	0	0	0	0	0	0	0	0	0	0	2	0	5	2	0	0	0	0	3	2	0	2	0	0	0	1	1	0	0	1	5	0	1
>k141_994921	927	12	2	0	8	0	0	6	0	0	0	0	0	4	2	4	0	0	0	0	0	1	12	0	2	0	0	0	0	4	0	0	0	0	0	0
>k141_995149	327	0	0	0	0	0	0	0	0	0	0	1	0	0	0	0	0	0	0	0	0	0	2	0	0	0	0	0	0	0	2	0	0	0	0	0
>k141_995283	486	5	0	0	2	0	0	0	0	0	0	0	0	0	0	0	0	0	0	0	0	0	0	0	0	0	0	0	0	0	0	0	0	0	0	0
>k141_995296	312	0	0	0	0	2	0	0	0	0	0	0	0	0	6	0	0	2	0	0	0	0	0	0	0	0	0	0	0	0	0	0	0	1	0	0
>k141_995361	618	0	0	0	0	0	0	0	0	0	0	4	0	1	0	0	0	0	0	0	0	0	0	2	0	0	0	0	0	4	0	0	2	0	0	4
>k141_996571	603	4	3	0	4	25	1	4	1	8	6	6	8	2	2	0	0	3	3	0	0	1	1	1	0	1	2	0	0	2	3	0	3	2	3	5
>k141_996988	636	0	0	1	2	0	0	0	0	0	0	2	2	2	3	3	0	0	0	0	2	4	4	0	1	0	0	0	3	2	2	0	0	0	0	0
>k141_997611	480	2	0	0	2	0	0	3	0	0	0	0	0	2	0	4	0	0	0	0	0	0	0	0	0	0	0	0	0	0	0	0	0	6	0	2
>k141_998505	2559	79	0	0	10	4	4	54	25	0	30	22	3	14	27	30	4	6	6	0	0	9	32	3	9	0	4	0	4	17	13	0	11	60	0	8
>k141_999111	360	17	0	0	2	0	0	5	0	0	0	0	3	6	0	6	0	0	0	0	0	7	3	0	8	0	0	0	0	28	0	0	4	7	0	2
>k141_999505	348	8	0	0	0	0	0	0	0	0	0	0	0	0	0	0	0	0	0	0	0	0	0	0	1	0	0	0	0	0	0	0	0	1	0	0
>k141_1000060	840	4	6	0	2	0	0	0	0	0	0	0	0	0	4	0	0	0	0	0	0	3	2	0	3	0	0	0	0	2	0	0	0	13	0	0
>k141_1001225	636	0	0	0	0	0	0	0	0	0	0	0	1	2	5	20	0	0	0	0	0	2	0	0	0	0	0	0	0	0	0	0	0	13	0	4
>k141_1001340	1716	0	2	0	0	0	0	0	0	0	0	0	0	0	0	0	0	0	0	0	0	190	0	0	0	0	0	0	0	0	0	0	0	0	0	0
>k141_1002105	462	0	0	3	0	5	0	1	0	4	1	3	2	0	0	0	0	0	0	2	0	0	1	0	0	0	0	0	0	0	0	0	0	0	2	0
>k141_1002571	276	0	0	0	0	0	0	0	0	0	2	0	0	0	1	0	0	0	0	0	0	0	0	0	0	0	0	0	2	0	0	0	0	0	0	0
>k141_1002611	336	0	0	0	0	0	0	0	2	0	0	0	0	0	0	0	0	0	6	0	2	0	0	0	0	0	0	0	0	0	0	0	0	0	0	0
>k141_1002840	1605	22	0	5	2	0	0	2	0	0	0	0	0	2	0	0	0	0	0	0	0	0	0	0	2	0	0	0	0	10	0	0	0	15	0	2
>k141_1002915	630	0	0	0	0	0	0	0	0	0	0	0	0	0	0	0	0	0	8	0	32	0	0	0	0	0	0	0	0	0	0	0	0	0	0	1
>k141_1003425	309	1	3	0	0	2	3	0	0	0	0	0	0	0	0	4	0	0	0	0	0	2	0	0	0	0	0	0	0	0	0	0	1	2	4	0
>k141_1003862	936	4	0	0	12	0	0	0	0	0	21	1	0	0	0	0	6	2	19	0	2	6	0	9	0	0	0	0	5	19	0	0	5	2	0	0
>k141_1004043	450	0	0	0	0	0	0	0	0	0	0	0	2	0	0	0	0	0	2	0	0	4	0	2	0	0	0	0	0	2	2	0	0	0	0	3
>k141_1004937	372	0	0	0	0	0	0	0	0	0	0	0	0	0	0	1	0	0	0	0	0	0	0	0	2	0	0	0	0	0	0	0	0	2	0	0
>k141_1006246	426	0	7	2	2	5	0	0	0	3	0	2	4	0	3	0	0	0	0	0	0	0	0	0	0	0	2	0	0	1	0	0	0	0	1	0
>k141_1007726	399	4	0	0	0	0	0	2	0	0	0	0	0	0	2	0	0	0	0	0	0	2	1	0	0	0	0	0	0	0	0	0	0	0	0	0
>k141_1008088	342	0	0	0	0	0	0	0	0	0	0	2	0	0	0	0	0	0	4	0	0	0	0	0	1	0	0	0	2	0	0	0	2	0	0	0
>k141_1008228	387	1	0	0	0	0	0	0	1	0	3	2	0	0	0	1	0	0	0	0	0	0	1	0	2	0	0	0	2	4	0	0	1	0	0	0
>k141_1008271	816	0	0	0	0	0	0	0	0	0	0	0	2	3	17	2	0	4	0	0	1	1	1	1	1	0	0	0	2	0	0	3	0	8	1	1
>k141_1009356	339	0	0	0	0	0	0	0	0	0	2	0	0	1	3	0	0	2	0	0	0	0	0	0	0	0	0	0	2	0	0	0	0	0	0	0
>k141_1011463	975	0	4	0	0	1	0	0	0	4	4	4	1	4	6	1	0	0	2	1	0	0	0	0	2	2	0	2	3	1	1	0	0	4	6	0
>k141_1012305	516	0	0	0	0	0	0	0	0	0	0	0	0	0	0	0	0	0	1	2	0	2	0	0	0	4	0	0	0	0	0	0	0	0	0	0
>k141_1013267	435	2	0	0	0	0	0	0	0	0	2	0	0	0	2	0	0	0	0	0	2	0	0	0	0	2	0	2	2	2	0	0	0	0	0	0
>k141_1013414	315	1	0	0	0	0	0	2	0	0	0	1	0	0	0	3	0	0	0	0	0	3	0	0	2	0	1	0	1	0	1	1	2	6	0	0
>k141_1013563	333	0	0	0	0	0	0	0	0	0	0	0	0	0	0	0	0	0	0	0	0	3	0	1	0	0	0	0	0	2	0	0	0	0	0	0
>k141_1013883	354	0	0	0	0	0	0	0	0	0	0	0	0	0	0	0	0	0	0	0	0	7	2	0	0	0	0	0	0	0	0	0	0	2	0	0
>k141_1014627	450	2	0	0	0	0	0	0	0	0	0	0	0	1	2	3	0	2	0	0	0	5	3	0	0	0	0	0	0	0	0	0	0	1	0	0
>k141_1015558	582	0	0	0	0	2	0	0	1	0	0	0	2	3	3	10	0	0	0	0	0	8	0	0	0	0	0	0	0	0	0	0	2	0	2	2
>k141_1016554	756	10	0	0	1	4	0	5	0	3	1	4	0	8	2	25	0	1	3	0	6	33	8	0	3	0	2	0	3	13	6	0	10	10	2	6
>k141_1016688	312	3	0	0	0	0	0	0	0	0	2	0	0	0	0	2	0	1	0	0	0	3	0	0	0	0	0	0	0	2	0	0	1	2	0	0
>k141_1017019	444	0	0	0	0	0	0	0	0	0	0	0	0	0	0	2	0	0	0	0	0	6	0	0	0	0	0	0	0	0	2	0	0	2	0	0
>k141_1018389	294	0	0	0	0	2	0	0	0	0	2	2	0	0	0	0	0	0	0	0	0	0	0	0	0	0	0	0	0	0	0	0	0	0	0	0
>k141_1019412	393	0	0	0	0	0	0	3	2	2	0	0	4	0	0	0	0	0	0	0	0	0	2	0	0	0	0	2	0	0	0	0	0	0	0	0
>k141_1019798	663	0	0	0	0	0	0	0	0	0	4	8	0	0	0	0	0	0	0	0	0	0	5	6	6	0	0	0	0	0	0	0	0	0	0	0
>k141_1020172	462	0	0	0	0	0	0	0	0	0	0	0	0	0	0	0	0	0	0	0	0	0	4	0	6	0	0	0	0	0	0	0	0	0	0	0
>k141_1020726	1836	3	4	2	4	8	2	0	0	2	0	0	2	0	2	0	2	4	7	2	6	0	0	0	4	4	8	6	11	4	14	12	5	2	28	2
>k141_1021068	615	0	0	0	1	2	0	0	0	0	0	0	0	1	1	1	2	0	0	0	2	1	3	4	0	0	0	0	1	0	0	0	2	0	0	5
>k141_1023541	978	6	0	0	3	0	0	4	1	0	2	0	0	0	0	8	0	1	0	0	0	11	5	0	0	0	0	0	0	0	3	0	3	1	0	7
>k141_1023578	843	0	0	0	0	0	0	0	0	0	0	0	0	2	0	1	0	0	0	0	0	9	4	0	10	0	0	0	4	0	0	0	4	0	2	0
>k141_1025188	285	1	2	0	2	0	0	0	0	0	0	0	3	0	0	4	0	0	0	0	0	0	2	0	0	0	2	0	0	1	2	0	1	2	1	1
>k141_1025635	366	1	0	0	0	0	0	0	0	0	0	0	2	0	0	0	0	0	0	2	0	0	0	0	0	0	0	0	0	0	0	0	0	0	2	0
>k141_1025710	555	1	3	0	2	0	0	0	0	2	3	1	0	0	6	0	0	4	0	0	2	5	0	0	0	2	2	2	0	4	2	3	4	3	0	0
>k141_1026194	933	0	0	0	0	0	0	0	0	0	0	0	1	0	0	0	0	0	0	0	0	0	0	0	0	0	0	0	0	0	0	0	0	51	0	0
>k141_1026197	375	0	2	0	0	0	0	0	0	0	0	0	0	0	5	6	0	0	0	0	0	3	0	0	0	0	0	0	0	0	0	0	0	1	0	0
>k141_1027021	1512	1	3	2	0	8	0	1	0	1	10	10	0	0	3	2	1	0	0	0	4	0	3	0	3	4	5	9	1	2	4	5	0	1	5	0
>k141_1027473	336	0	0	0	0	0	0	0	0	0	0	1	0	0	0	0	0	0	1	0	0	0	0	0	2	0	0	0	0	1	0	0	2	0	0	0
>k141_1027633	939	9	2	0	8	2	0	2	0	2	4	4	0	0	2	0	0	2	0	0	0	0	2	0	0	0	0	0	0	0	2	0	0	0	0	1
>k141_1029657	537	0	0	0	0	0	0	0	0	0	0	0	0	0	0	6	0	2	0	0	0	4	0	0	0	2	0	0	1	0	2	0	2	0	0	0
>k141_1029750	1776	33	0	2	5	0	4	2	2	0	0	3	2	10	4	32	3	0	2	0	0	36	11	0	9	0	2	0	0	53	2	0	7	29	1	2
>k141_1029885	483	2	0	0	0	0	0	0	0	0	0	0	0	2	0	0	0	0	0	0	0	0	6	4	2	0	0	0	0	0	1	0	1	0	0	1
>k141_1030109	4020	0	384	58	0	44	4	14	16	48	96	129	20	22	307	0	44	64	58	55	111	0	68	66	74	162	75	125	219	105	470	252	164	60	230	56
>k141_1030793	366	0	0	0	0	0	0	0	1	0	0	0	0	0	0	2	0	0	0	0	0	1	0	0	2	0	0	0	0	1	1	0	0	2	0	0
>k141_1031075	201	0	0	0	0	0	0	0	0	0	0	0	0	0	0	0	0	0	0	0	0	0	0	0	0	0	0	0	0	3	0	0	0	0	0	0
>k141_1032098	423	0	0	0	2	0	0	0	0	2	0	0	0	0	0	0	0	0	0	0	0	0	0	0	0	1	0	0	0	0	2	0	1	0	2	0
>k141_1032559	501	0	0	0	0	0	0	0	0	0	0	0	0	0	0	0	0	0	0	0	0	6	0	0	0	0	0	0	0	0	0	0	0	4	0	2
>k141_1032825	396	0	0	0	0	0	0	0	0	0	0	0	0	0	0	0	2	0	2	0	3	5	0	0	4	0	0	0	2	0	2	0	0	1	0	3
>k141_1032994	465	0	2	0	5	4	0	0	0	4	0	3	1	0	0	0	0	0	0	0	1	0	2	0	1	4	0	0	0	0	0	2	0	0	4	0
>k141_1033979	327	0	0	0	2	0	0	0	0	0	0	0	0	0	4	0	0	0	0	0	0	2	0	0	1	0	0	0	0	0	0	0	0	2	0	2
>k141_1035258	801	0	0	0	0	0	0	2	0	0	0	0	0	0	2	0	0	0	2	0	0	2	4	0	2	0	0	0	0	0	0	0	0	8	0	0
>k141_1035777	432	0	0	0	0	0	0	0	0	0	0	0	0	0	6	0	0	0	0	0	2	0	0	0	0	0	0	0	0	0	4	0	0	3	0	2
>k141_1035866	1167	1	0	0	3	0	0	2	0	0	0	2	0	0	0	7	5	9	16	2	4	17	3	6	8	0	0	0	1	12	2	1	14	4	6	0
>k141_1036113	654	0	0	2	0	0	0	0	1	0	4	13	0	0	0	2	0	0	0	0	0	6	6	3	2	0	0	0	0	4	2	0	2	0	0	0
>k141_1036487	537	0	0	0	0	0	0	0	0	0	0	0	0	0	0	0	0	0	0	0	0	0	0	0	0	0	0	2	3	2	0	0	2	0	0	0
>k141_1036651	336	4	2	0	0	0	0	2	0	0	0	0	0	0	0	0	0	0	0	0	0	0	0	0	0	0	0	0	0	0	0	0	0	0	0	0
>k141_1037769	360	0	0	0	0	2	0	0	0	0	0	0	0	2	0	1	0	0	0	0	1	1	2	0	1	0	0	0	0	0	0	0	0	0	0	0
>k141_1037813	366	0	0	0	0	0	0	0	0	0	5	3	0	1	2	0	0	0	0	0	0	4	2	0	2	0	0	0	0	0	1	0	1	2	0	3
>k141_1038529	756	18	0	0	6	0	0	7	1	0	0	1	0	0	0	2	2	0	1	0	0	11	5	0	0	0	0	0	0	16	0	0	1	11	0	2
>k141_1039532	510	0	0	0	0	0	0	0	0	0	0	0	0	6	4	1	0	0	0	0	0	0	0	0	0	0	0	0	0	0	0	0	0	1	0	0
>k141_1039943	480	0	4	0	1	1	1	2	0	2	0	0	6	0	1	0	0	1	0	0	0	1	0	0	0	0	0	1	0	2	1	0	0	4	0	0
>k141_1041214	1851	0	0	0	1	2	0	1	0	0	2	5	0	0	0	0	11	4	36	6	34	0	28	15	10	3	2	12	8	2	6	5	2	0	0	0
>k141_1041792	543	0	0	6	2	2	2	0	0	0	0	2	0	2	0	0	0	0	0	0	0	0	0	0	0	0	0	0	0	0	2	0	0	0	0	2
>k141_1042136	327	0	0	0	0	0	0	2	2	0	0	2	0	0	0	1	0	0	0	0	0	0	1	2	0	0	0	0	1	0	0	0	0	0	0	0
>k141_1042657	309	0	0	0	0	0	0	0	0	0	0	0	0	0	0	0	0	0	0	0	0	0	0	0	0	0	0	0	0	0	0	2	2	0	2	0
>k141_1044201	937	0	0	0	0	0	0	0	0	0	0	0	0	6	10	11	0	0	0	2	2	17	0	0	0	0	0	0	0	0	4	0	0	10	0	2
>k141_1044302	372	0	0	0	0	0	0	0	1	0	0	2	0	0	0	1	0	0	0	0	0	0	0	0	2	0	0	0	0	0	0	0	0	0	0	0
>k141_1044890	297	0	0	0	0	0	0	0	0	0	0	0	0	0	0	0	0	0	0	0	0	0	3	2	2	0	0	0	0	0	0	0	0	0	0	1
>k141_1045399	2892	2	6	0	0	2	0	2	0	0	6	7	0	5	18	1	6	4	3	2	20	2	7	12	4	6	8	4	40	66	62	2	30	68	46	8
>k141_1046087	345	2	0	0	0	0	0	2	0	0	1	0	0	0	0	1	0	0	0	0	0	4	1	0	0	0	0	0	0	0	0	0	0	5	0	0
>k141_1046216	963	3	5	0	2	0	2	0	0	6	3	7	2	1	2	5	4	4	0	4	5	6	6	4	3	5	0	4	7	10	8	0	3	5	1	5
>k141_1047263	381	0	0	0	0	0	0	0	0	0	0	0	0	0	2	0	0	0	0	0	2	2	0	0	2	0	0	0	0	4	0	0	0	2	0	1
>k141_1047319	696	2	0	0	0	0	0	0	0	0	0	0	0	0	0	0	0	0	0	0	0	0	0	0	2	0	2	0	0	0	1	0	0	0	4	0
>k141_1048357	522	0	0	0	1	0	1	0	0	0	0	0	0	2	4	9	0	0	0	0	0	9	0	0	0	0	0	0	2	1	0	0	0	10	0	0
>k141_1050864	597	0	0	0	1	0	0	0	0	0	0	0	0	0	0	0	0	0	0	0	0	0	0	0	0	0	0	0	0	6	0	0	0	13	0	0
>k141_1051665	594	0	0	0	0	0	0	0	0	0	0	6	0	0	0	0	2	2	0	0	0	0	0	0	0	0	0	0	2	0	0	0	0	0	0	0
>k141_1052161	3402	63	0	2	12	10	2	24	10	0	0	4	2	29	10	27	0	0	8	0	2	37	7	0	6	0	2	0	2	20	14	0	14	23	2	12
>k141_1053850	333	0	0	0	0	0	0	0	0	0	0	0	0	0	0	2	0	0	0	0	0	7	0	0	0	0	0	0	0	0	0	0	0	0	0	0
>k141_1053912	588	3	2	0	1	6	4	0	0	1	4	3	0	1	0	2	0	0	4	0	2	6	2	0	2	0	3	0	0	0	4	0	0	8	3	0
>k141_1054719	675	0	0	0	0	0	0	0	0	0	0	0	1	2	2	0	1	4	0	4	0	4	4	2	0	6	2	7	5	1	3	2	2	0	1	0
>k141_1055322	348	0	0	0	0	0	0	0	0	0	0	0	0	0	0	0	2	0	0	0	0	0	0	0	0	0	0	0	0	0	2	0	0	1	0	0
>k141_1057052	1146	4	2	10	2	8	0	4	0	6	0	6	10	0	2	0	0	0	0	0	0	0	0	0	0	0	0	0	0	0	0	2	0	0	2	1
>k141_1058976	537	0	0	0	0	0	0	2	0	0	2	0	0	0	0	8	0	0	0	0	0	2	0	0	0	0	0	0	0	0	0	0	0	0	0	0
>k141_1059990	345	0	0	0	0	0	0	0	0	0	2	2	0	0	0	0	0	0	2	0	0	0	0	0	0	0	0	0	0	0	0	0	2	2	0	0
>k141_1060644	342	0	0	0	0	0	0	0	0	0	0	0	0	0	0	0	0	0	0	0	0	0	0	0	0	0	0	0	0	1	0	0	0	0	0	1
>k141_1061158	408	0	0	0	0	0	0	0	0	0	0	0	0	0	0	0	0	0	0	0	0	0	0	0	0	0	0	0	0	0	0	0	0	4	0	0
>k141_1061410	1107	0	0	0	0	0	0	0	0	0	0	0	0	0	0	0	2	2	0	0	2	0	0	2	0	0	0	0	1	0	4	4	0	1	8	2
>k141_1063393	345	0	0	0	0	0	0	0	0	0	0	0	0	0	0	2	0	0	0	0	0	7	0	0	0	0	0	0	0	0	0	0	0	0	0	0
>k141_1063565	444	0	0	0	0	0	0	0	0	0	0	0	0	0	2	4	0	0	0	0	0	4	4	0	0	0	0	0	0	2	0	0	0	9	0	1
>k141_1064118	381	0	0	0	0	0	0	0	0	0	0	0	0	0	0	2	0	9	0	0	0	0	0	0	0	0	0	0	0	0	0	0	0	0	0	0
>k141_1064269	537	1	0	0	0	0	0	0	0	1	0	0	0	3	0	4	0	1	0	0	0	9	0	0	0	0	0	0	0	0	0	0	1	3	9	0
>k141_1066857	630	0	0	0	0	3	0	0	0	0	0	0	2	2	0	2	0	1	1	0	0	7	6	2	5	0	0	0	0	3	0	0	2	5	0	1
>k141_1067127	1134	0	0	0	0	0	0	0	6	0	0	0	0	0	0	0	0	0	4	2	1	0	3	6	4	4	0	0	10	2	2	2	0	0	0	0
>k141_1067544	447	0	2	2	0	0	0	0	0	2	5	0	0	0	0	0	0	1	0	0	0	0	0	0	0	0	0	0	0	0	0	0	0	0	0	0
>k141_1068712	603	4	0	0	6	16	2	2	4	5	1	5	0	0	6	0	1	3	0	8	2	2	9	2	8	13	8	2	3	1	11	0	1	5	12	2
>k141_1068781	447	0	0	0	0	0	0	0	0	0	0	0	0	2	2	6	0	0	0	0	0	0	2	0	2	0	0	0	0	0	0	0	0	1	0	0
>k141_1069601	546	0	0	0	2	0	0	0	3	0	2	5	0	2	2	7	1	0	2	0	0	3	4	0	0	0	0	0	0	2	0	0	0	10	0	0
>k141_1070290	276	0	0	0	0	0	0	0	0	0	0	0	0	0	0	0	0	4	0	0	0	0	0	1	2	0	0	0	0	0	0	0	1	0	0	0
>k141_1071999	3450	171	66	23	0	19	95	21	15	2	50	49	2	0	0	0	0	26	14	18	0	13	174	362	154	7	4	46	0	0	12	16	93	2	2	12
>k141_1072964	522	1	0	0	2	0	0	2	0	0	0	3	0	2	9	7	0	0	0	0	0	1	0	0	1	0	0	0	0	0	0	0	2	9	0	0
>k141_1073741	891	0	12	0	1	18	1	5	0	3	3	1	5	4	10	2	0	2	2	0	0	4	2	1	0	1	0	0	0	3	1	0	0	4	2	0
>k141_1073978	405	12	24	12	50	32	15	11	25	52	44	48	41	29	71	0	16	39	21	50	36	2	12	18	13	36	35	28	95	78	112	23	36	11	84	22
>k141_1074569	600	0	0	0	0	0	0	0	0	0	2	0	0	0	0	0	2	0	4	0	0	0	0	2	6	0	0	0	0	9	0	0	2	0	0	0
>k141_1075403	495	0	2	0	0	1	0	2	0	0	0	0	0	3	2	4	0	2	0	2	0	4	0	0	0	0	0	0	0	0	2	0	1	5	0	2
>k141_1078270	741	0	0	0	0	0	0	0	0	0	0	0	0	1	0	4	0	0	0	0	0	1	18	4	12	0	0	0	2	1	0	0	5	0	0	0
>k141_1078609	348	0	0	2	0	0	0	0	2	0	0	0	0	0	0	0	0	0	0	0	0	0	0	0	0	0	0	0	2	1	1	0	1	2	0	0
>k141_1083016	330	0	2	3	1	1	0	0	0	1	0	0	0	0	0	0	0	0	0	0	0	2	0	0	0	7	0	0	0	0	0	0	0	0	3	0
>k141_1083180	1128	5	4	2	0	0	2	0	2	1	0	2	0	3	34	4	0	0	1	2	0	6	2	0	0	0	4	0	0	2	0	5	0	48	8	15
>k141_1083229	318	2	0	0	0	2	0	2	4	0	0	1	0	0	0	0	0	0	0	0	0	1	0	0	0	0	0	0	0	0	0	0	0	0	0	0
>k141_1083372	621	0	0	0	0	0	0	0	0	0	0	0	0	0	1	0	4	2	1	0	2	0	2	1	6	7	4	1	7	1	7	2	2	0	0	0
>k141_1084232	378	0	0	0	0	0	0	0	0	0	0	0	0	0	0	5	0	0	0	0	0	0	0	0	0	0	0	0	0	0	0	0	0	0	0	0
>k141_1084341	1080	10	4	0	7	2	2	1	7	0	9	8	1	8	0	12	2	4	1	0	0	15	7	3	1	0	0	0	0	51	0	0	17	12	1	0
>k141_1085047	402	0	1	2	0	8	0	0	0	4	0	8	3	6	9	2	1	6	1	1	0	2	3	0	3	2	0	0	1	2	4	0	0	0	7	0
>k141_1085679	342	0	0	0	0	2	2	0	0	2	2	0	0	0	0	0	0	2	0	0	0	0	0	0	0	0	0	0	0	0	0	0	0	0	0	0
>k141_1087341	480	0	1	0	0	0	0	0	0	0	0	0	0	1	0	0	0	0	0	0	0	0	0	0	0	0	0	0	0	0	0	0	0	19	0	0
>k141_1087410	333	0	0	0	0	0	0	0	0	0	0	0	0	2	2	4	0	2	0	0	0	2	0	0	0	0	0	0	0	0	0	0	0	4	0	0
>k141_1088131	342	0	0	0	0	0	0	0	0	0	0	0	0	8	0	0	0	0	0	0	2	0	0	0	0	0	0	0	0	0	0	0	0	2	0	0
>k141_1088166	389	0	0	0	0	0	0	0	0	0	0	0	0	4	0	6	0	0	0	0	0	0	1	0	0	0	0	0	0	0	0	0	0	2	0	0
>k141_1089183	384	16	0	1	1	0	0	2	0	0	0	0	0	0	0	1	2	0	0	0	0	0	0	0	2	0	0	0	0	1	0	0	2	3	0	4
>k141_1089255	525	0	0	0	0	0	0	0	0	0	0	0	0	4	0	4	2	3	3	0	0	23	10	0	0	0	0	0	0	0	0	0	0	7	0	1
>k141_1090614	270	0	0	0	0	0	0	0	0	0	0	0	0	0	0	3	0	2	0	0	0	0	5	0	0	0	0	0	0	0	0	0	0	0	0	0
>k141_1090654	501	3	0	0	0	0	2	0	0	0	2	0	0	0	0	1	1	0	0	0	0	2	9	1	4	0	0	0	1	2	2	0	2	0	0	0
>k141_1090965	1191	2	0	3	12	9	2	9	4	0	4	20	0	0	6	0	10	0	5	2	4	0	5	12	18	3	2	4	14	12	4	8	12	0	4	12
>k141_1092222	315	0	0	0	0	0	0	0	0	0	0	0	0	2	0	2	0	0	0	0	0	1	0	0	0	0	0	0	0	0	0	0	0	6	0	0
>k141_1092481	879	20	14	9	33	39	20	21	6	14	16	24	2	1	14	4	6	13	13	11	6	2	47	11	27	32	9	12	16	15	35	12	15	17	16	0
>k141_1095182	1929	6	0	0	0	0	0	0	6	0	3	2	2	8	37	14	2	5	2	0	4	23	4	0	7	0	2	0	9	3	11	0	2	52	0	8
>k141_1096441	579	6	0	0	0	0	0	0	0	0	2	0	0	0	0	2	0	0	0	0	0	0	2	0	0	0	0	0	0	0	0	0	2	2	0	0
>k141_1096664	1626	4	4	0	0	4	0	5	0	0	5	7	1	0	2	0	6	7	5	2	2	1	4	2	4	0	0	0	0	0	6	2	4	0	2	0
>k141_1098366	330	0	0	0	0	0	0	0	0	0	0	0	0	0	0	0	3	0	0	0	0	0	0	2	1	0	0	0	0	2	0	0	0	0	0	0
>k141_1098572	315	0	0	0	0	0	0	0	0	0	0	0	0	0	0	0	0	0	0	0	0	1	1	0	0	0	0	0	0	0	2	0	5	2	0	1
>k141_1098935	384	0	0	0	0	0	0	0	0	0	0	0	2	0	0	0	0	0	0	0	0	2	0	0	0	0	0	0	0	0	0	0	2	2	0	0
>k141_1099361	1356	39	12	7	30	81	16	50	9	18	18	27	2	6	11	1	7	8	3	16	2	2	40	13	39	35	21	14	20	8	38	10	14	15	13	2
>k141_1099865	771	0	0	0	0	0	0	0	0	0	0	0	0	0	0	0	4	4	2	0	2	0	4	0	2	0	2	2	0	1	2	2	4	0	0	0
>k141_1099944	297	0	0	0	2	0	0	0	0	0	0	0	0	0	0	0	0	0	0	0	0	0	0	0	0	1	0	0	0	0	0	0	0	0	0	0
>k141_1100353	4173	9	100	27	4	36	2	3	8	19	51	97	14	16	138	11	391	186	198	131	230	12	175	277	286	165	70	331	176	243	706	91	180	55	191	23
>k141_1101121	594	10	0	0	2	0	2	5	2	0	0	0	0	3	0	1	1	1	0	0	0	17	5	2	4	0	0	0	0	12	2	0	9	6	0	1
>k141_1102862	768	0	0	0	0	0	0	0	0	0	0	0	0	0	0	9	0	0	0	0	0	0	8	0	2	0	2	0	0	0	0	0	0	0	0	2
>k141_1104235	351	0	0	0	0	0	0	0	0	0	0	1	1	2	2	0	0	0	0	0	0	0	0	0	0	0	2	2	1	0	3	2	1	0	0	0
>k141_1105375	540	11	0	0	4	0	0	4	1	0	0	0	0	1	0	2	0	0	0	0	0	8	3	0	0	0	0	0	0	14	1	0	2	6	0	0
>k141_1105485	1212	0	0	0	0	0	0	0	0	0	0	0	0	2	6	0	4	0	4	0	2	0	10	10	4	0	1	16	0	0	4	6	0	2	0	0
>k141_1106051	432	1	0	0	1	0	0	0	0	0	2	0	0	0	0	0	0	0	0	0	2	1	0	0	5	1	0	0	1	0	2	0	1	0	0	0
>k141_1106322	315	0	0	0	0	0	0	0	0	0	0	0	0	0	0	0	0	0	0	0	0	0	0	0	0	0	0	0	0	0	0	0	2	2	0	0
>k141_1106930	4038	0	0	0	0	0	0	0	0	0	4	0	2	2	0	48	345	304	378	52	10	295	242	218	260	2	25	0	12	11	2	0	10	59	0	26
>k141_1107044	495	0	0	0	0	0	0	0	0	0	0	0	0	0	0	16	0	2	0	0	1	8	0	0	0	0	0	0	0	0	0	0	0	0	0	2
>k141_1109438	324	1	1	0	0	0	0	0	0	0	0	1	0	3	2	0	0	0	0	0	0	0	0	0	0	1	0	2	0	0	1	0	0	0	3	0
>k141_1110087	630	0	0	0	0	0	0	0	0	0	0	8	0	0	0	0	0	0	0	2	0	0	0	4	4	0	0	0	0	0	0	0	0	0	0	0
>k141_1110182	450	0	0	0	0	0	0	0	0	0	0	0	0	4	0	2	0	0	0	0	0	16	0	0	0	2	0	0	0	0	0	0	0	2	0	0
>k141_1110616	1947	0	0	0	0	0	0	0	0	0	0	0	2	4	0	39	2	0	2	0	0	29	0	0	0	0	0	0	0	8	0	0	2	8	0	10
>k141_1112095	1278	0	0	0	3	0	0	0	0	0	10	0	0	0	0	2	1	0	3	0	5	4	0	6	0	0	0	0	17	15	0	0	10	0	0	0
>k141_1112247	1074	13	0	0	6	0	0	2	0	0	4	3	0	0	0	6	0	1	1	0	1	11	2	0	7	0	0	0	0	0	0	0	0	0	0	1
>k141_1113375	345	0	0	0	0	0	0	0	0	0	0	0	0	0	0	0	0	0	0	0	0	0	0	0	0	0	0	0	0	0	0	0	0	4	0	5
>k141_1113491	483	0	0	0	0	0	0	0	0	0	0	0	0	0	4	0	2	2	3	0	0	0	0	0	0	0	0	0	1	1	0	0	0	0	0	0
>k141_1113687	297	0	0	0	0	0	0	0	0	0	0	0	0	0	0	1	0	0	0	0	0	5	0	0	0	0	0	0	0	0	0	2	2	0	1	0
>k141_1115083	1221	0	0	0	0	0	0	0	0	0	0	0	0	0	0	0	0	0	0	0	0	2	56	0	0	0	0	0	0	0	0	0	0	0	0	0
>k141_1115637	720	3	0	0	0	0	0	0	0	0	1	0	0	2	0	14	0	0	0	0	0	10	0	0	2	0	0	0	0	3	4	0	6	2	0	2
>k141_1116000	441	0	2	0	0	0	0	0	2	2	2	0	2	0	0	0	0	0	0	0	0	0	2	3	0	0	0	0	0	0	0	0	0	0	2	0
>k141_1116278	366	0	0	0	0	0	0	0	0	0	0	0	0	0	0	0	0	2	0	0	0	0	0	0	6	0	0	0	0	0	0	0	0	0	0	0
>k141_1116497	369	0	0	0	0	0	0	0	0	0	0	0	0	0	0	0	2	0	2	0	0	0	0	0	0	0	0	0	0	0	0	0	2	0	0	0
>k141_1117191	483	0	0	2	0	3	0	0	0	0	0	0	0	0	0	3	0	0	0	0	0	4	0	0	0	1	0	0	0	0	0	0	0	0	3	0
>k141_1118510	435	4	0	0	0	0	0	0	0	0	0	0	0	0	1	0	0	0	2	4	0	0	0	0	0	0	0	0	0	0	0	0	0	2	0	0
>k141_1118536	1314	38	5	1	11	0	1	3	3	0	8	16	1	13	4	18	1	3	2	0	0	18	6	0	1	0	1	0	3	51	4	0	15	8	0	1
>k141_1118872	315	0	0	0	0	0	0	2	0	0	0	0	0	0	0	0	0	0	2	0	0	0	0	0	0	0	0	0	0	0	0	0	0	0	0	0
>k141_1119092	600	2	2	0	0	0	0	0	0	0	2	0	0	8	2	16	0	4	1	0	1	12	5	0	0	0	0	0	1	0	0	0	2	4	0	1
>k141_1119280	351	2	1	0	1	0	0	2	0	0	0	0	0	0	0	0	0	0	0	0	0	0	0	0	0	0	0	0	0	0	0	0	0	0	0	0
>k141_1120037	4107	172	6	2	18	0	0	27	4	2	54	24	2	2	7	24	10	4	24	0	11	34	73	14	26	0	0	0	20	49	33	6	85	62	0	19
>k141_1121127	1257	0	0	0	0	5	0	0	0	0	0	0	0	6	13	18	0	0	0	0	0	10	0	0	0	2	0	0	0	0	0	0	0	12	0	0
>k141_1121792	432	3	0	0	0	0	0	5	0	0	0	2	0	0	0	0	0	0	0	0	0	0	0	0	0	0	0	0	0	0	0	0	0	0	0	0
>k141_1121870	351	0	0	0	0	0	0	0	0	0	0	0	0	1	0	0	0	0	0	0	0	0	0	0	0	0	0	0	0	0	0	0	3	2	0	0
>k141_1122483	393	0	0	0	0	2	0	0	0	0	2	1	0	0	0	0	0	0	0	0	0	0	0	0	0	0	0	0	2	0	2	0	0	0	0	0
>k141_1124121	333	0	0	0	0	0	0	0	0	0	0	0	0	0	0	2	0	0	0	0	0	2	2	0	0	0	0	0	0	0	0	0	0	0	0	0
>k141_1127257	468	0	0	0	0	0	0	0	0	0	0	0	0	0	0	0	0	5	0	3	2	0	2	0	2	2	0	2	4	0	6	0	0	2	4	0
>k141_1127692	702	0	0	0	0	0	0	0	0	0	0	2	0	0	0	0	0	0	4	0	0	0	0	0	0	0	0	0	0	0	0	0	18	0	0	0
>k141_1127878	417	3	1	0	0	0	0	0	0	1	1	1	0	1	0	1	0	0	0	0	0	3	1	0	2	0	0	0	0	1	1	0	0	0	0	0
>k141_1128828	354	0	0	0	0	0	0	0	0	0	0	0	0	0	2	2	0	0	0	0	0	2	0	2	0	0	0	0	0	0	0	0	2	0	0	0
>k141_1129952	438	0	0	0	0	0	0	0	0	0	1	0	0	0	0	2	0	2	0	2	0	0	1	0	0	0	0	2	0	0	2	0	0	0	0	0
>k141_1130156	432	0	0	0	0	0	0	0	0	0	0	0	3	0	1	2	0	0	0	0	1	6	2	0	0	0	0	0	0	0	1	0	0	0	0	0
>k141_1130267	291	2	0	0	0	0	0	0	0	0	0	0	0	1	0	0	0	0	1	0	0	0	0	0	1	3	1	1	0	1	0	0	0	0	0	0
>k141_1130653	327	0	0	0	0	0	0	0	0	0	0	2	0	0	0	0	0	0	0	0	0	0	0	0	0	0	0	1	0	0	2	0	0	0	0	0
>k141_1130789	330	0	0	0	0	0	0	0	0	0	0	0	0	0	0	3	0	0	0	0	0	0	0	0	0	0	0	0	0	0	0	0	0	5	0	0
>k141_1131659	348	0	2	0	0	0	0	0	0	0	4	0	0	0	0	0	0	0	0	0	0	0	0	0	0	0	0	0	0	0	4	0	0	0	0	0
>k141_1132457	762	7	0	0	0	0	0	2	5	0	0	0	0	0	4	12	0	0	0	0	0	5	0	0	0	0	0	0	0	2	0	0	0	4	0	5
>k141_1132611	423	0	0	0	0	0	0	0	0	0	0	0	0	0	0	0	4	0	0	0	0	0	2	0	0	0	0	0	0	2	1	0	6	0	0	0
>k141_1133411	384	0	1	0	4	0	0	0	0	0	0	0	0	0	0	0	0	0	0	0	0	0	0	0	0	0	0	0	0	2	0	0	2	0	0	1
>k141_1134233	177	0	0	0	0	0	0	0	0	0	0	0	0	0	0	0	0	0	0	0	0	3	0	0	0	1	0	0	0	0	0	0	0	0	0	0
>k141_1135126	375	1	0	0	0	0	0	2	0	0	0	0	0	2	0	1	0	0	0	0	0	0	0	2	0	0	0	0	0	0	0	0	0	1	0	0
>k141_1136162	855	0	0	0	0	0	0	0	2	0	2	0	0	16	0	1	0	4	0	0	2	7	2	0	12	0	2	0	0	4	8	0	4	0	0	0
>k141_1137043	756	9	0	0	8	0	0	1	4	0	19	12	1	0	0	4	0	2	1	0	0	4	0	0	0	0	0	0	0	28	0	0	19	1	0	0
>k141_1137413	2220	0	0	4	0	0	0	0	0	0	4	2	2	0	6	0	4	0	0	0	2	0	0	2	2	8	10	14	14	4	12	0	4	6	5	0
>k141_1137425	654	0	0	0	2	0	0	0	0	0	0	0	0	0	0	2	0	0	2	0	0	10	2	0	0	0	0	0	0	0	0	0	1	3	0	6
>k141_1138133	873	0	0	0	0	0	0	0	0	0	0	0	0	0	0	2	1	0	0	0	0	20	6	0	0	0	0	0	0	0	0	0	0	2	0	0
>k141_1139068	553	0	0	0	0	0	0	0	0	0	0	0	0	0	0	3	0	0	0	0	0	4	4	2	6	0	0	0	2	2	4	0	0	0	0	0
>k141_1139098	655	0	0	0	0	0	0	0	0	0	0	0	0	0	0	0	2	0	0	0	0	2	19	0	4	0	0	0	0	0	0	0	0	2	0	0
>k141_1139657	336	0	0	0	0	3	0	0	0	0	0	0	0	2	0	4	0	0	0	0	0	1	0	0	0	0	0	0	1	0	0	0	0	2	1	0
>k141_1139916	579	0	0	0	0	0	0	0	0	0	0	0	2	0	0	0	0	0	0	0	0	12	0	0	2	0	0	0	0	2	0	0	0	0	0	0
>k141_1140694	870	0	0	0	0	0	0	0	0	0	0	4	0	3	0	3	9	1	4	0	2	4	18	6	5	2	4	0	3	5	5	0	13	0	1	0
>k141_1140841	231	0	0	0	0	0	0	0	0	0	0	0	0	0	0	0	0	0	0	0	0	0	0	0	2	0	0	0	0	0	0	0	1	0	0	0
>k141_1141018	1275	0	0	0	0	0	0	0	1	0	4	2	2	23	13	12	4	2	6	0	2	3	18	0	12	0	1	0	2	2	0	2	2	7	0	1
>k141_1141065	456	4	1	3	2	2	1	1	4	1	1	2	0	1	0	9	0	6	0	1	0	6	8	1	4	1	0	0	7	3	7	1	1	0	0	3
>k141_1141743	348	0	0	0	0	0	0	0	0	0	0	0	0	0	4	2	0	0	0	0	0	1	0	0	0	0	0	0	0	0	0	0	0	6	0	2
>k141_1142187	459	2	1	0	0	2	0	0	0	2	0	0	0	2	2	4	0	0	1	0	0	9	1	0	1	0	0	0	1	0	5	0	1	2	1	0
>k141_1142383	540	0	0	0	0	0	0	0	0	0	0	0	0	0	0	0	0	0	0	0	2	0	2	3	0	0	0	0	0	0	0	0	0	0	0	0
>k141_1142553	354	0	0	0	0	0	0	0	0	0	0	0	0	3	2	0	0	0	0	0	0	0	0	0	0	0	2	0	0	0	0	0	0	0	0	0
>k141_1143792	759	0	0	0	0	0	0	0	0	0	0	2	0	0	0	4	2	2	2	0	6	6	3	3	1	0	0	0	3	4	1	0	8	2	0	0
>k141_1143987	420	0	0	0	0	0	0	0	0	0	0	2	0	0	2	0	2	0	0	0	0	3	4	3	2	0	0	0	0	0	0	1	0	2	0	0
>k141_1144690	918	0	0	0	0	0	0	0	0	0	0	0	0	4	0	6	12	1	0	0	0	4	35	0	0	0	0	0	0	0	0	0	0	0	0	0
>k141_1144758	363	2	0	0	0	0	0	0	0	0	0	0	0	0	0	2	0	0	0	0	0	6	0	0	0	0	0	0	0	2	0	0	0	0	0	0
>k141_1145053	549	0	0	3	0	4	0	0	0	0	2	0	0	1	2	2	0	0	0	4	2	0	0	0	0	0	0	0	0	0	0	0	0	0	4	0
>k141_1145246	672	1	0	0	0	4	0	0	0	0	2	0	0	0	6	0	3	3	4	0	0	0	0	6	7	3	8	1	7	2	4	6	4	2	0	2
>k141_1147039	327	0	0	0	0	0	0	0	0	0	0	0	0	0	0	0	3	2	0	0	0	0	6	0	0	0	0	0	2	0	0	0	0	0	0	0
>k141_1147085	1167	0	0	0	0	0	0	0	0	0	0	0	0	2	0	2	0	0	0	0	0	4	2	0	0	0	0	0	0	0	0	0	0	31	0	4
>k141_1147271	300	0	0	0	0	0	0	0	0	0	0	0	0	0	0	0	0	0	0	0	0	0	0	2	0	0	0	0	0	0	0	0	0	7	0	0
>k141_1147547	435	1	0	0	0	0	0	0	0	0	0	0	0	4	0	0	0	1	0	0	0	2	0	0	0	0	0	0	0	6	0	0	0	0	0	0
>k141_1147765	399	0	0	0	0	0	0	0	0	0	0	0	0	0	0	0	0	0	2	0	0	0	4	0	6	0	2	0	1	0	0	0	0	1	0	0
>k141_1147823	315	0	0	0	0	0	0	0	0	0	0	0	0	0	4	4	1	0	0	0	0	0	1	0	0	0	0	0	0	0	0	0	0	3	0	0
>k141_1149670	579	2	0	0	0	0	0	0	2	0	0	0	0	0	2	1	0	0	0	0	0	2	2	0	0	0	0	0	4	0	2	0	0	6	2	0
>k141_1149811	396	0	0	0	0	0	0	0	0	0	0	0	0	0	0	0	2	2	0	0	0	0	0	0	0	0	0	0	0	0	0	0	2	0	0	0
>k141_1150201	564	0	0	0	0	0	0	0	0	0	0	0	0	0	0	0	0	1	0	4	1	0	0	0	0	2	0	1	0	0	0	0	0	0	0	0
>k141_1150423	429	0	0	0	0	0	0	0	0	0	0	0	0	0	0	0	0	0	0	0	0	4	0	0	0	0	0	0	0	0	2	0	1	13	0	0
>k141_1152704	657	0	0	0	0	0	0	0	0	0	0	0	0	2	0	3	0	2	0	0	1	10	5	3	2	0	0	0	2	3	0	0	4	12	0	1
>k141_1152866	831	0	0	0	0	0	0	0	0	0	0	0	0	0	0	0	0	0	0	0	0	2	0	0	0	0	0	0	0	6	0	0	4	21	0	2
>k141_1153151	330	0	1	0	0	0	0	0	0	0	0	0	0	0	0	0	0	0	0	0	0	0	0	4	0	0	0	0	0	0	0	0	0	0	0	0
>k141_1155430	567	0	0	0	0	0	0	2	0	0	0	0	0	0	0	0	0	0	0	1	0	0	0	0	0	0	0	0	0	14	0	0	0	0	0	0
>k141_1155446	810	0	0	0	0	0	0	0	0	0	0	0	0	0	0	0	6	4	0	0	0	1	2	2	0	0	6	0	0	6	0	0	0	0	0	3
>k141_1155771	303	0	0	0	0	0	0	0	0	0	0	0	0	0	8	0	0	0	0	0	0	0	0	0	0	0	0	0	0	0	0	0	0	4	0	0
>k141_1155905	498	0	21	3	2	3	1	3	2	3	8	12	13	2	78	0	115	70	42	62	44	3	8	26	33	22	28	72	26	38	46	13	36	31	32	3
>k141_1156238	510	0	0	0	0	0	0	0	0	0	0	2	0	0	0	0	2	0	2	0	0	0	0	2	0	0	0	1	0	0	0	6	0	3	2	0
>k141_1156703	924	0	0	0	0	0	0	0	0	0	2	0	2	6	4	10	1	10	2	0	4	6	5	0	5	0	0	0	0	2	0	0	6	0	0	4
>k141_1157206	975	0	0	0	2	2	0	0	0	0	0	0	0	2	0	17	2	1	1	0	1	10	2	1	4	0	0	0	2	1	1	0	0	2	1	2
>k141_1157300	408	0	0	0	0	0	0	0	0	0	1	0	0	0	0	4	0	0	0	0	2	7	0	0	0	0	0	1	0	0	0	0	1	0	0	0
>k141_1159141	318	0	0	0	0	0	0	0	0	0	0	0	0	0	0	0	0	0	0	0	0	5	0	0	2	0	0	0	0	0	1	0	0	0	2	0
>k141_1159842	420	0	0	0	0	0	0	0	0	0	0	0	0	1	1	0	0	0	0	0	0	1	0	1	0	0	0	0	0	4	0	0	4	2	0	3
>k141_1160642	481	0	0	0	0	0	0	0	0	6	0	0	0	0	0	0	0	2	0	5	0	0	0	0	0	2	0	0	0	0	0	0	0	0	0	0
>k141_1160735	243	0	0	0	0	0	0	0	0	0	0	0	0	0	1	3	0	0	0	0	0	1	0	0	0	0	0	0	0	0	0	0	0	2	0	0
>k141_1162039	429	0	0	0	0	0	0	0	0	0	2	0	0	0	0	0	0	0	0	0	0	0	1	4	0	0	0	2	0	0	0	0	0	0	0	0
>k141_1162071	489	0	2	0	0	0	0	0	0	0	0	0	0	0	2	0	0	0	2	2	0	1	0	0	0	0	0	2	2	2	4	0	0	0	2	0
>k141_1163922	318	0	2	3	0	0	0	1	0	4	1	2	0	0	0	0	2	0	0	0	7	0	0	2	2	1	0	1	0	2	0	0	0	0	0	0
>k141_1164089	2550	27	0	2	4	0	0	2	7	0	15	5	2	35	6	17	4	17	6	0	4	17	10	13	2	0	0	0	0	79	8	0	24	14	0	2
>k141_1165152	996	0	0	0	0	0	0	0	4	0	0	4	0	15	2	12	0	6	2	0	1	10	4	0	6	0	0	2	1	2	4	0	4	0	0	0
>k141_1165677	444	0	0	0	0	0	0	0	0	0	2	2	0	0	0	0	0	0	4	0	0	0	0	0	0	0	0	0	0	0	0	0	2	3	0	1
>k141_1165691	300	0	0	0	0	0	0	0	0	2	0	0	0	0	0	0	0	0	0	0	0	7	0	0	0	0	0	0	0	0	0	0	0	0	0	0
>k141_1165803	327	0	0	0	0	0	0	0	0	0	0	0	0	0	0	2	0	0	0	0	1	1	0	0	0	0	0	0	0	2	0	0	0	2	0	0
>k141_1165806	351	1	0	0	0	0	0	0	0	0	0	0	0	0	1	5	0	0	0	0	0	5	2	5	3	0	0	0	0	0	0	0	0	1	0	2
>k141_1166249	375	0	0	0	0	0	0	0	0	0	0	1	0	0	0	0	0	2	0	0	0	2	0	0	0	0	0	0	0	5	0	2	0	0	0	0
>k141_1167207	1092	0	0	0	0	1	0	0	6	0	2	2	0	4	8	4	3	0	2	0	2	2	2	2	4	0	0	2	6	0	7	0	2	0	2	0
>k141_1167912	1395	0	0	0	0	0	0	0	0	0	0	0	0	0	0	0	7	0	5	0	6	0	8	4	4	2	0	0	2	4	2	6	6	0	4	0
>k141_1168436	303	0	0	0	0	0	0	0	0	0	0	0	0	2	0	0	0	0	0	0	0	0	2	0	2	0	0	0	0	0	0	0	0	0	0	0
>k141_1168622	426	6	0	0	0	0	0	0	0	0	2	0	0	2	2	0	0	0	0	0	0	0	10	2	4	0	0	0	0	2	0	0	0	2	0	0
>k141_1168732	342	0	0	0	0	0	0	0	0	0	0	0	0	0	0	0	0	2	0	0	0	0	2	0	0	0	0	0	0	2	2	0	0	0	0	0
>k141_1169220	732	0	4	0	0	2	0	0	2	4	0	4	0	4	8	1	1	0	2	0	0	0	0	1	0	0	0	0	2	0	4	0	2	4	1	1
>k141_1169763	609	0	0	2	0	0	0	0	0	0	0	0	0	0	0	14	0	0	0	0	0	0	4	0	0	0	0	0	0	5	0	0	0	25	0	0
>k141_1170459	843	5	0	0	0	0	0	1	0	0	0	0	1	7	0	9	2	1	4	0	0	5	4	0	6	0	0	0	0	18	0	0	3	6	0	2
>k141_1170517	360	0	0	0	0	0	0	0	0	0	0	0	0	0	0	4	0	0	0	0	0	2	0	0	0	0	0	0	0	0	0	0	0	0	0	0
>k141_1170734	342	0	0	0	0	2	0	0	2	0	0	2	0	2	0	4	0	0	0	0	0	0	0	0	0	0	0	0	0	1	2	0	0	2	0	0
>k141_1173361	393	0	0	0	0	5	0	1	0	1	0	0	0	3	0	2	0	1	0	0	0	1	0	0	0	0	0	0	0	0	0	0	0	0	0	0
>k141_1176264	444	0	0	0	0	0	0	0	0	1	0	1	0	0	0	12	0	1	0	0	0	5	2	1	0	0	0	0	0	2	2	0	0	1	0	0
>k141_1177969	339	0	0	0	0	0	0	0	4	0	0	0	0	0	0	0	0	0	0	0	0	0	0	0	0	0	0	0	0	2	0	0	0	0	0	0
>k141_1178786	504	0	0	0	0	0	0	0	0	0	0	0	0	0	0	4	0	0	0	0	0	2	2	0	0	0	0	0	3	2	2	0	0	0	0	0
>k141_1178938	417	0	0	2	0	8	0	0	0	0	0	2	0	0	0	0	0	0	0	0	0	0	0	0	0	0	0	0	0	0	0	0	0	0	0	0
>k141_1180368	474	0	0	0	0	0	0	0	0	0	0	0	0	0	4	0	2	1	1	9	12	0	0	0	0	0	0	0	0	4	1	0	0	2	2	2
>k141_1181371	1086	5	0	0	2	0	0	0	0	0	0	0	0	4	3	4	0	0	0	0	0	2	3	2	0	0	0	0	2	9	0	0	2	56	0	0
>k141_1181474	297	0	0	0	0	0	0	0	0	0	0	0	0	0	0	0	0	0	0	0	0	2	0	0	0	0	0	0	0	2	2	0	2	0	0	0
>k141_1182115	321	0	0	0	0	0	0	0	0	0	0	2	0	2	3	0	0	0	0	2	0	0	1	1	0	0	0	1	8	1	4	1	1	4	0	0
>k141_1182405	510	0	4	0	0	0	0	0	0	2	0	0	0	0	0	0	0	4	0	4	0	0	0	0	0	0	0	0	0	0	0	0	0	0	0	0
>k141_1183265	753	0	6	0	0	0	0	0	0	0	0	0	0	1	8	2	0	0	0	0	0	0	2	0	0	0	0	0	0	0	0	0	1	2	0	4
>k141_1184305	2301	0	0	0	0	0	0	0	0	0	0	0	2	2	31	83	8	2	1	2	11	92	18	4	8	0	6	0	6	27	6	2	4	142	0	43
>k141_1184427	477	0	0	0	0	0	0	0	0	0	0	0	0	0	0	7	0	0	0	0	0	11	1	0	0	0	0	0	0	0	0	0	0	2	0	2
>k141_1184735	264	0	0	0	1	0	0	2	0	0	0	0	0	0	0	5	0	0	2	0	0	2	1	0	0	0	0	0	0	0	0	0	0	1	0	0
>k141_1185666	381	0	0	0	0	0	0	0	0	0	0	0	2	1	2	0	0	0	0	0	0	3	1	0	0	0	0	0	0	0	0	0	0	1	0	0
>k141_1185981	438	0	0	0	0	0	0	0	0	0	0	0	0	0	0	0	2	0	0	0	0	0	5	0	0	0	0	0	0	0	2	0	2	0	0	0
>k141_1186411	365	0	0	0	0	0	0	0	0	0	0	0	0	0	0	0	0	0	0	0	0	2	1	0	0	0	0	0	0	0	0	0	0	1	0	0
>k141_1186538	318	0	0	0	0	0	0	0	0	0	0	0	0	0	0	0	0	0	0	0	0	5	0	0	0	0	0	0	0	2	0	0	0	0	0	2
>k141_1187747	494	0	0	0	0	0	0	0	0	0	0	0	0	0	1	0	0	0	0	0	0	5	2	0	1	0	0	0	0	0	0	0	0	1	0	0
>k141_1188215	498	2	0	0	0	0	0	0	0	0	0	2	0	0	0	2	0	0	0	0	0	1	0	0	0	0	0	0	0	2	2	0	0	4	0	3
>k141_1188384	435	2	0	0	0	0	0	2	0	0	0	4	0	0	0	0	0	2	0	0	0	3	2	0	0	0	1	0	3	1	2	0	2	5	2	0
>k141_1188796	861	2	0	0	0	0	0	0	0	0	0	0	0	0	0	0	0	0	0	0	0	0	0	0	0	0	0	0	0	2	0	0	34	2	0	0
>k141_1189148	351	2	0	0	2	0	0	2	0	0	5	0	0	1	0	0	0	0	0	0	0	0	0	0	0	0	0	0	0	3	0	0	0	2	0	0
>k141_1189162	297	3	0	3	1	2	0	0	0	3	0	0	0	0	0	0	0	3	1	0	0	0	1	0	2	0	0	0	0	0	0	0	0	0	0	0
>k141_1190094	402	3	0	0	0	4	0	1	0	2	0	4	3	1	1	5	0	2	0	0	0	0	1	0	0	2	1	1	0	2	5	0	0	0	0	0
>k141_1190631	402	0	0	0	2	0	0	0	0	0	0	1	0	0	2	0	0	0	0	0	0	0	0	0	0	0	0	0	0	0	0	0	0	2	0	0
>k141_1192181	2226	0	0	0	0	0	0	0	0	0	2	0	0	0	0	0	54	16	18	4	13	0	0	2	4	0	0	10	9	0	0	0	2	0	0	0
>k141_1193408	324	6	0	0	0	0	0	2	0	0	0	0	0	0	0	2	0	0	0	0	0	0	0	0	0	0	0	0	0	2	0	0	0	0	0	0
>k141_1193780	387	0	0	0	0	0	0	0	0	0	0	0	0	0	2	2	0	0	2	0	0	0	4	2	2	0	0	0	0	0	0	0	0	0	0	0
>k141_1193928	534	0	0	0	0	0	0	0	0	0	0	0	0	0	0	0	0	0	0	0	0	0	0	0	0	0	0	0	0	12	2	0	7	2	0	0
>k141_1195034	300	0	0	0	0	0	0	0	0	0	2	0	0	0	0	0	0	0	0	0	0	0	0	0	2	0	0	0	0	2	0	0	0	2	0	0
>k141_1196143	1071	20	0	1	2	0	0	5	0	0	0	0	0	21	1	43	1	4	0	0	0	43	14	0	7	0	0	0	0	50	0	0	9	43	0	7
>k141_1196179	1421	6	0	0	1	0	0	4	0	0	4	10	0	4	0	16	2	0	0	0	0	2	11	2	10	0	0	0	0	9	0	0	8	6	0	2
>k141_1196309	399	2	0	0	0	0	0	0	0	0	0	0	0	0	0	0	0	0	0	0	0	0	0	0	0	0	0	0	0	3	0	0	0	2	0	0
>k141_1196491	471	0	0	0	1	0	0	0	0	0	0	0	0	0	0	2	0	0	0	0	0	6	0	0	0	0	0	0	0	0	0	0	0	0	0	0
>k141_1198212	462	0	0	0	0	0	0	0	0	0	1	0	0	0	2	1	0	0	0	0	2	2	0	0	0	0	0	0	0	2	1	0	4	1	0	0
>k141_1198856	540	0	2	0	2	0	2	0	0	0	0	2	0	0	0	0	0	4	0	0	0	0	0	0	0	0	0	0	0	0	0	0	6	0	2	0
>k141_1199337	450	0	0	0	0	0	0	0	0	0	0	0	0	0	0	0	0	1	0	0	0	8	0	0	0	0	0	0	0	0	0	0	0	0	0	0
>k141_1199411	423	5	0	0	0	0	0	3	0	0	0	0	4	1	0	0	0	0	0	0	0	2	2	1	0	0	0	0	0	7	1	0	4	5	0	4
>k141_1199553	396	1	0	2	2	6	2	2	0	4	0	0	2	5	4	0	0	0	0	0	0	1	0	0	0	0	0	0	0	0	0	0	0	0	0	0
>k141_1199772	606	2	0	0	0	0	2	0	0	0	0	2	0	0	0	4	0	0	0	2	0	4	0	0	2	2	0	0	2	0	2	0	0	0	2	1
>k141_1200695	876	2	0	2	0	0	1	2	2	0	4	3	0	2	0	2	0	2	2	0	3	1	4	2	7	0	0	1	2	0	2	0	1	10	0	2
>k141_1201951	1095	0	0	1	2	0	0	0	0	0	0	4	0	0	0	3	7	0	0	2	2	10	4	0	4	0	2	0	0	3	0	0	0	0	0	4
>k141_1203538	333	0	3	2	3	4	0	0	0	0	2	3	2	3	0	0	2	0	1	0	0	0	2	2	0	0	0	2	0	0	2	3	0	0	2	0
>k141_1203540	522	1	0	0	0	0	0	0	0	0	0	0	1	0	0	5	0	2	0	0	0	4	0	0	0	0	0	0	0	0	0	0	2	2	0	0
>k141_1204569	411	0	0	0	0	0	0	0	0	0	0	0	0	0	0	5	0	0	0	0	0	4	0	0	0	0	0	0	0	0	0	0	0	2	0	0
>k141_1204720	387	2	0	0	5	0	0	0	2	0	2	0	0	1	0	0	1	0	0	0	0	0	1	0	0	0	0	0	0	23	0	0	4	0	0	0
>k141_1205175	741	0	0	0	0	2	0	0	0	0	0	0	0	3	14	0	0	0	0	0	0	0	0	0	0	0	0	0	0	1	0	0	0	10	0	2
>k141_1205208	636	25	0	0	3	0	0	9	0	0	0	2	2	4	0	15	0	2	1	0	0	15	2	0	0	0	0	0	0	20	2	0	9	12	0	2
>k141_1205891	1215	7	0	0	11	0	0	0	2	0	15	0	0	2	0	3	0	2	0	0	0	0	1	3	0	0	0	0	0	42	1	0	17	0	0	0
>k141_1206592	438	0	0	0	0	0	0	0	0	0	0	2	0	0	0	2	0	0	0	0	0	0	0	0	0	0	0	0	0	2	0	0	16	2	0	0
>k141_1209020	351	0	0	0	0	0	0	0	0	0	0	0	0	0	0	9	0	0	0	0	0	0	4	0	0	0	0	0	2	0	0	0	0	0	0	0
>k141_1209412	423	0	2	0	6	2	2	0	0	0	0	0	2	0	0	0	0	0	0	0	1	0	0	0	0	1	0	0	0	0	0	0	0	0	2	0
>k141_1209441	681	0	0	0	0	0	0	0	0	5	0	0	0	0	0	0	0	5	0	13	0	0	0	0	0	0	0	0	0	0	0	0	0	0	0	0
>k141_1209883	369	2	0	0	0	0	0	3	0	0	0	2	0	0	0	0	0	0	0	0	0	0	2	0	0	0	0	0	0	0	0	0	2	2	0	0
>k141_1210233	393	7	0	0	0	0	0	0	0	0	0	0	0	0	0	0	0	0	0	0	0	0	0	0	0	0	0	0	0	0	0	0	0	0	0	0
>k141_1211325	801	0	0	0	0	0	0	0	0	0	0	0	0	2	12	15	0	0	0	0	0	12	0	0	0	0	0	0	0	0	0	0	0	3	0	0
>k141_1211343	306	0	0	0	0	0	0	0	0	0	0	0	0	0	2	0	0	2	0	0	0	1	1	0	1	0	0	0	5	0	4	0	0	0	3	0
>k141_1211461	315	0	0	0	0	0	0	0	0	0	0	0	0	0	0	0	0	0	0	0	0	2	0	0	0	0	0	0	0	2	0	0	1	0	0	0
>k141_1211627	1428	2	0	2	0	0	0	0	0	0	0	2	0	4	43	2	18	8	6	6	4	1	2	4	6	7	34	10	87	16	38	34	29	61	35	8
>k141_1212179	822	0	0	0	0	0	0	0	3	0	4	4	0	0	0	2	0	0	0	0	0	2	2	4	3	0	0	0	0	6	0	0	4	2	0	0
>k141_1213116	381	0	0	0	0	0	0	0	0	0	0	0	0	0	6	2	0	2	0	0	0	0	0	0	0	0	0	0	0	0	0	0	0	0	0	0
>k141_1214596	579	0	0	0	0	0	0	0	0	0	0	1	0	0	0	0	0	0	2	0	0	0	0	0	6	0	0	0	0	4	0	0	4	0	0	0
>k141_1215610	483	0	0	0	0	0	0	0	0	0	0	0	3	3	4	8	0	0	0	0	0	1	0	0	0	0	0	0	0	0	0	0	0	6	0	3
>k141_1215982	411	0	0	0	0	0	0	0	0	0	4	2	0	0	0	1	1	0	2	0	9	0	5	6	5	7	0	1	5	0	12	0	2	0	0	0
>k141_1216573	480	1	2	0	0	2	1	0	0	0	0	0	0	0	2	0	0	0	0	0	2	1	0	0	0	0	0	0	0	0	0	2	0	0	2	0
>k141_1217452	666	5	8	1	1	4	1	1	3	3	14	4	3	10	16	11	5	5	9	9	2	25	12	5	16	5	9	6	17	2	27	1	14	18	3	8
>k141_1217585	2112	0	0	0	0	0	0	0	0	0	0	0	0	16	0	13	14	4	2	0	0	22	117	0	4	0	0	0	0	0	0	0	0	2	0	0
>k141_1217596	408	0	0	0	0	0	0	0	0	0	0	0	2	1	0	0	0	0	0	0	0	1	0	0	2	0	0	0	0	0	0	0	0	0	0	0
>k141_1218883	474	0	0	0	0	0	1	0	0	2	0	2	0	4	0	0	0	0	4	7	1	0	0	0	2	4	0	1	2	2	9	0	0	0	1	0
>k141_1220385	366	0	0	0	0	0	0	0	0	0	0	0	0	0	2	0	0	0	0	2	0	0	0	0	0	0	0	0	1	0	0	2	0	0	0	0
>k141_1221099	390	0	0	0	0	0	0	0	0	0	0	0	0	0	0	0	0	5	0	2	0	0	0	0	0	0	0	0	0	0	0	0	0	0	0	0
>k141_1221891	303	0	0	0	0	0	0	0	0	0	0	0	0	1	2	2	0	0	0	0	0	0	0	0	0	0	0	0	0	1	0	0	0	12	0	0
>k141_1223122	390	0	2	0	0	0	0	0	0	0	0	4	0	0	0	0	0	0	0	0	0	0	0	0	0	2	0	2	0	0	2	4	0	0	0	0
>k141_1223218	396	0	0	0	0	0	0	0	0	0	0	0	0	0	0	0	0	0	0	0	0	0	2	3	0	0	0	0	0	0	0	2	0	0	0	0
>k141_1223331	1434	15	2	0	0	0	0	2	1	0	0	11	2	4	1	10	8	5	1	0	2	14	79	8	21	0	0	4	0	24	2	0	20	1	0	1
>k141_1224194	507	0	0	0	0	5	0	0	0	0	0	0	0	0	0	0	4	0	2	0	0	0	0	0	0	0	0	0	0	2	0	2	0	0	2	0
>k141_1225054	396	0	0	0	0	0	0	0	0	0	0	0	0	0	0	6	0	0	0	0	0	0	0	0	0	0	0	0	0	3	0	0	0	0	0	0
>k141_1225441	381	0	0	0	0	0	0	0	0	0	0	0	0	0	0	1	2	0	0	0	0	5	0	0	2	0	0	0	0	0	0	0	0	0	0	0
>k141_1226912	525	0	0	0	0	0	0	0	0	0	0	0	0	0	0	24	0	0	0	0	0	8	0	0	0	0	0	0	0	0	0	0	0	0	0	0
>k141_1227847	318	0	0	0	0	0	0	0	0	0	0	0	0	0	0	0	0	0	0	0	0	0	0	0	0	0	0	0	0	0	2	0	0	2	2	0
>k141_1228273	264	0	0	0	0	0	0	2	0	0	1	2	0	0	0	0	0	0	0	2	0	0	0	0	0	0	0	0	0	0	0	0	0	0	2	0
>k141_1228527	342	0	0	0	0	0	0	0	0	0	0	0	0	0	0	0	0	0	0	0	0	0	2	2	5	0	0	0	0	0	0	0	0	0	0	0
>k141_1229140	255	0	0	0	0	0	0	0	1	0	0	0	0	0	0	0	0	2	2	0	2	2	0	0	2	0	0	0	0	0	0	0	0	0	0	0
>k141_1229509	879	4	0	0	0	0	0	2	4	0	6	0	4	5	12	38	0	4	0	0	2	22	4	0	17	0	6	0	1	0	6	2	0	30	0	2
>k141_1229754	327	0	0	1	0	0	0	0	0	0	2	0	0	0	2	2	0	0	0	0	0	0	0	2	0	0	0	0	1	2	0	0	2	2	0	2
>k141_1229826	411	0	0	0	0	0	0	0	0	0	0	2	0	0	0	0	0	0	0	0	0	6	0	0	0	0	0	0	0	0	0	0	0	8	0	0
>k141_1230575	651	0	0	0	0	0	0	0	0	0	2	0	0	1	0	11	0	0	0	0	0	2	0	0	0	0	0	0	0	0	0	0	0	12	0	2
>k141_1230701	399	0	0	0	0	0	0	0	0	0	0	2	0	0	2	2	0	0	0	0	0	0	0	0	0	0	0	0	1	2	0	0	0	0	0	0
>k141_1231166	507	0	0	0	0	0	0	0	0	0	0	0	0	0	0	4	0	0	0	0	0	10	0	0	0	0	0	0	0	0	0	0	0	7	0	0
>k141_1231342	552	0	0	0	1	0	0	0	0	0	2	1	0	0	4	0	0	2	0	0	0	0	10	9	8	0	6	1	8	3	6	2	14	0	3	1
>k141_1231594	462	0	0	0	0	0	0	0	0	0	0	0	0	0	2	2	1	1	0	0	0	2	2	2	2	0	2	0	0	2	0	0	2	0	0	0
>k141_1231713	309	0	0	0	0	3	0	0	0	0	0	0	0	0	2	0	0	0	0	0	0	0	0	0	0	0	0	0	0	0	0	0	0	2	0	0
>k141_1231907	255	0	0	0	0	0	0	0	0	0	0	0	0	0	0	1	0	2	0	0	1	2	0	0	2	0	0	0	2	0	0	0	1	3	0	0
>k141_1232559	402	0	0	0	0	0	0	0	0	6	3	4	0	0	0	0	0	0	0	0	0	0	0	0	0	0	0	0	0	0	0	0	0	0	0	0
>k141_1233255	411	0	0	0	0	0	0	0	0	0	0	0	0	0	0	2	2	0	3	0	0	2	1	0	3	0	0	0	0	4	1	0	0	8	0	4
>k141_1234204	465	19	0	0	3	0	0	10	0	0	0	0	2	2	0	5	0	0	0	0	0	8	1	0	2	0	0	0	0	6	0	0	2	5	0	1
>k141_1234294	468	7	0	0	0	0	0	0	0	0	0	0	0	0	0	2	0	0	0	0	0	0	0	0	2	0	0	0	0	0	0	0	0	3	0	0
>k141_1234415	405	0	0	0	0	0	0	0	0	0	0	0	0	2	0	0	0	0	0	0	0	0	0	0	0	0	0	0	0	0	0	0	0	11	0	0
>k141_1234680	677	0	0	0	2	0	0	0	2	0	0	6	0	0	0	0	0	0	0	0	0	0	0	2	0	0	0	0	0	10	4	0	4	2	0	0
>k141_1235276	354	0	0	0	2	6	1	0	0	1	0	0	0	0	0	0	0	0	0	0	0	0	0	0	0	1	0	0	0	0	0	0	0	0	1	0
>k141_1235306	354	0	0	0	0	0	0	0	0	0	0	7	0	0	0	0	0	0	0	0	0	1	0	0	0	0	4	0	0	0	0	0	0	4	0	0
>k141_1236126	372	0	0	0	0	0	0	0	0	0	0	0	0	0	0	2	0	0	0	0	0	2	0	0	0	0	0	0	0	0	0	0	0	2	0	1
>k141_1238250	255	0	1	0	0	0	0	0	0	0	0	0	0	0	0	0	0	1	0	0	0	0	0	0	0	0	0	0	0	3	0	0	0	7	0	2
>k141_1239174	333	0	0	0	0	0	0	0	0	0	0	0	0	0	0	0	0	0	0	0	0	1	0	0	0	0	0	0	0	0	2	0	0	1	0	0
>k141_1239829	2568	3	0	0	0	0	0	0	0	0	0	0	0	4	0	13	4	12	10	0	0	27	141	21	11	0	2	0	0	10	0	0	0	4	0	0
>k141_1240211	264	0	7	1	8	4	0	0	1	2	4	3	0	2	9	0	5	3	1	8	9	0	5	2	0	3	12	5	13	18	28	0	21	1	7	0
>k141_1240281	450	1	0	0	0	0	0	0	0	0	0	0	0	2	0	4	0	0	1	0	0	7	0	0	0	0	0	0	0	6	0	0	0	4	0	0
>k141_1240782	681	10	16	8	10	30	10	6	5	17	18	15	8	2	13	19	17	5	8	9	5	36	14	11	9	12	9	8	16	7	27	1	18	14	17	13
>k141_1241882	396	0	0	0	0	0	0	0	0	0	0	0	0	0	2	0	0	0	2	0	0	0	0	2	2	0	0	2	0	2	0	0	0	0	2	0
>k141_1241909	417	0	2	0	0	3	2	3	2	0	0	2	0	0	0	0	0	0	0	0	0	0	0	0	0	0	0	0	0	0	0	0	0	0	0	0
>k141_1242578	657	18	0	0	4	0	0	3	0	0	0	0	0	0	0	6	2	0	0	0	0	11	5	0	10	0	0	0	0	17	1	0	8	7	0	0
>k141_1243976	786	2	0	0	0	0	0	0	0	0	0	1	0	0	0	20	0	0	0	0	0	11	2	0	0	0	0	0	0	0	0	0	1	0	0	0
>k141_1244862	1152	22	12	4	0	2	0	13	0	1	2	0	0	0	1	0	0	0	0	0	0	0	0	0	0	0	0	0	0	0	0	0	0	0	0	6
>k141_1245085	636	0	0	0	0	0	0	0	0	0	0	0	0	0	0	0	2	6	0	0	1	0	0	6	2	0	0	0	0	0	0	0	0	0	0	0
>k141_1246002	393	0	0	0	0	0	0	0	0	0	0	0	0	0	0	0	1	2	2	0	0	0	6	0	0	0	2	0	0	0	0	0	4	0	0	0
>k141_1246094	627	0	0	0	0	0	2	0	0	0	2	2	0	0	0	1	0	2	6	0	0	4	0	3	1	0	0	0	0	0	0	0	0	0	0	0
>k141_1246123	1011	0	0	0	0	0	0	0	2	0	2	4	0	0	2	2	6	0	2	1	2	0	2	6	8	4	4	4	0	3	10	2	2	0	2	0
>k141_1246410	387	0	0	0	0	0	0	0	0	0	0	0	0	3	0	0	0	0	0	0	0	0	0	0	0	0	0	0	0	0	2	0	0	0	0	4
>k141_1246583	1473	12	0	2	6	0	1	1	0	0	0	0	1	4	1	6	2	2	2	2	1	10	12	0	5	0	2	0	1	0	0	2	2	42	0	5
>k141_1247541	354	1	0	0	2	0	0	0	0	0	0	0	0	0	0	1	0	0	0	0	0	0	0	0	0	0	0	0	0	0	0	0	4	2	0	0
>k141_1248214	282	0	0	2	0	0	0	0	0	0	0	0	0	0	0	0	0	0	0	0	0	0	0	0	0	0	0	0	0	0	0	0	0	0	0	0
>k141_1248570	342	0	0	0	0	0	0	0	0	0	0	0	0	4	4	2	0	0	0	0	0	2	0	0	0	0	0	0	0	0	0	0	0	4	0	0
>k141_1249101	258	0	0	0	0	0	0	0	0	0	0	0	0	0	0	0	0	0	0	0	0	0	0	0	1	0	0	0	2	2	0	0	0	0	0	0
>k141_1250467	264	2	0	0	0	0	0	0	1	0	0	1	0	0	0	0	0	0	0	0	0	0	0	3	0	0	0	0	0	0	0	0	0	0	0	0
>k141_1250485	312	0	0	0	0	0	0	2	0	0	0	0	0	0	0	3	0	0	0	0	0	0	0	0	0	0	0	0	0	0	0	0	0	0	0	2
>k141_1250539	399	0	0	0	0	0	0	0	0	0	0	0	0	0	0	4	0	0	0	0	0	7	0	0	0	0	0	0	0	0	0	0	0	2	0	0
>k141_1251110	774	6	2	0	0	0	0	0	2	0	0	2	0	0	2	12	0	0	0	0	0	12	0	0	0	0	0	0	0	0	2	0	6	2	0	2
>k141_1251820	552	383	680	907	746	847	480	982	338	710	566	931	1086	965	916	2	156	387	124	424	133	1	50	253	149	225	129	256	198	62	318	163	204	89	1182	354
>k141_1253434	504	1	0	0	0	1	0	0	0	1	2	2	0	0	1	3	0	1	0	2	0	3	0	5	4	1	0	0	0	1	2	0	2	0	0	0
>k141_1255348	1005	0	0	0	0	0	0	0	0	0	0	0	0	0	0	6	0	0	0	0	0	2	7	6	0	0	0	0	0	4	0	0	0	7	0	0
>k141_1255684	396	0	0	0	2	0	0	0	0	0	0	0	0	0	0	1	0	0	0	0	0	0	0	0	0	0	0	0	0	0	0	0	6	0	0	0
>k141_1256966	315	0	0	0	0	0	0	0	0	0	0	0	0	0	0	2	0	0	0	0	0	2	1	2	4	0	0	0	2	0	0	0	1	0	0	0
>k141_1256993	4323	14	0	2	62	0	0	0	0	0	87	13	0	0	0	0	72	10	85	2	18	31	2	15	2	0	0	4	70	192	4	0	69	5	0	0
>k141_1257224	441	0	0	0	2	0	0	0	0	0	0	0	1	1	2	2	0	0	2	2	0	0	11	0	3	0	0	0	0	1	0	0	0	0	0	2
>k141_1257673	816	0	2	0	0	0	0	0	0	0	0	4	0	0	4	0	0	2	0	0	0	0	0	2	2	0	0	0	2	2	0	2	0	0	2	0
>k141_1257711	357	0	0	0	0	0	0	0	0	0	0	0	0	0	0	1	0	0	0	0	0	2	4	0	1	0	0	0	0	1	4	0	0	0	0	0
>k141_1258389	1047	4	0	0	0	0	0	0	0	0	2	6	0	6	0	7	0	0	2	0	0	6	0	0	10	0	0	0	2	16	8	0	8	0	0	0
>k141_1258993	345	0	0	0	0	0	0	0	2	0	0	0	0	0	0	0	0	0	0	0	0	0	0	0	2	0	0	0	0	0	2	0	5	0	0	0
>k141_1259035	609	11	0	0	0	0	0	0	0	0	0	0	0	0	0	1	2	0	0	0	0	5	2	2	0	0	0	0	0	0	0	0	0	0	0	0
>k141_1259061	483	0	0	0	0	0	0	0	0	0	0	0	0	0	0	0	1	0	0	0	0	0	0	2	0	0	0	7	0	0	0	0	0	0	0	0
>k141_1259965	441	0	0	0	0	0	0	0	0	0	0	0	0	2	0	2	0	0	0	0	0	5	4	0	0	0	0	0	0	2	0	0	2	0	0	2
>k141_1259974	330	1	0	0	0	0	0	0	0	0	0	0	0	0	0	0	2	0	0	2	0	0	2	0	0	0	0	0	0	0	0	0	0	2	0	1
>k141_1260000	333	1	0	0	0	2	0	0	2	0	1	0	0	0	0	0	0	0	0	0	0	0	0	0	0	0	0	0	0	0	4	0	0	0	0	0
>k141_1260262	699	0	0	2	0	0	2	0	0	0	6	6	0	0	0	0	0	0	2	0	2	0	0	6	0	0	0	0	0	0	0	0	4	0	0	0
>k141_1261032	453	0	0	0	0	0	0	0	0	0	2	0	2	0	0	0	0	2	0	0	0	0	0	0	0	0	0	0	0	2	0	0	4	0	0	0
>k141_1261125	495	0	0	0	0	0	0	0	0	0	0	0	0	0	0	0	2	0	0	0	0	0	0	0	0	0	0	0	0	0	2	2	0	0	0	0
>k141_1262078	360	0	0	0	0	0	0	0	0	0	2	0	1	1	0	4	0	0	0	0	0	0	1	0	0	0	0	0	0	2	0	0	0	3	1	2
>k141_1264924	750	0	2	1	2	3	0	2	2	0	5	12	0	1	27	5	9	5	0	1	0	2	1	1	5	1	4	5	9	5	13	11	9	14	9	7
>k141_1266000	805	4	0	2	4	0	0	0	0	0	16	4	2	2	0	2	0	0	0	0	0	0	0	0	0	0	0	0	0	2	0	0	0	2	0	0
>k141_1266083	375	0	0	0	0	0	0	0	0	0	0	0	2	0	0	5	0	0	0	0	0	0	0	0	0	0	0	0	0	0	0	0	2	0	0	0
>k141_1266220	600	0	0	0	0	0	0	0	0	0	0	0	0	3	0	13	0	0	0	0	0	12	0	0	0	0	0	0	0	0	0	0	1	10	0	1
>k141_1266857	324	0	0	0	0	0	0	0	0	0	0	0	0	0	0	0	0	0	2	0	0	0	2	0	2	0	0	0	0	0	0	0	0	0	0	0
>k141_1266862	516	0	2	0	0	1	0	0	0	0	0	0	4	4	0	0	0	2	0	0	0	1	0	0	0	0	0	0	0	0	6	0	0	2	5	0
>k141_1267171	855	55	0	2	13	5	2	19	0	0	1	1	2	13	1	45	0	0	1	0	0	38	13	0	14	2	0	0	1	42	5	0	23	44	2	4
>k141_1267997	1101	12	4	0	2	0	0	0	2	0	0	0	0	2	4	12	2	0	0	0	0	7	3	5	0	0	0	0	0	3	0	0	1	53	0	0
>k141_1268045	306	0	0	0	0	2	0	0	0	0	0	4	0	0	0	0	0	0	0	0	0	0	0	0	0	0	0	0	0	0	2	0	0	0	2	0
>k141_1268247	402	2	2	0	0	0	0	0	0	0	0	0	0	0	0	0	0	0	0	0	0	4	1	0	2	0	0	0	0	0	0	0	1	0	0	2
>k141_1268549	402	1	0	0	0	0	0	0	0	0	0	0	0	1	0	2	0	0	0	0	2	10	1	0	0	0	1	0	0	0	0	0	0	2	0	3
>k141_1268615	486	4	0	0	0	0	0	1	0	0	0	0	0	5	0	7	2	2	1	0	0	31	2	0	0	0	0	0	0	2	0	0	1	2	0	0
>k141_1269477	369	0	0	0	0	0	0	0	0	0	0	0	0	0	0	0	0	0	0	0	0	0	0	0	0	0	0	0	0	8	0	0	0	0	0	0
>k141_1269589	435	0	8	0	0	4	2	2	0	1	2	1	4	4	0	0	4	0	0	2	0	2	5	0	8	0	1	0	1	4	5	0	0	0	0	0
>k141_1269881	381	0	0	0	0	0	0	0	0	0	0	0	0	0	0	0	0	0	0	0	0	0	0	0	0	0	0	0	0	0	0	0	0	11	0	0
>k141_1272529	384	0	1	0	0	0	0	0	0	4	0	0	0	0	0	0	0	4	0	2	0	0	0	0	0	0	0	0	0	0	0	0	0	0	0	0
>k141_1272604	393	0	0	0	0	0	0	0	0	0	3	0	1	2	0	0	0	0	0	0	0	0	0	0	2	2	0	0	2	1	0	0	0	2	2	0
>k141_1273161	297	0	0	0	0	0	0	0	0	0	0	0	0	0	0	0	2	0	0	0	1	0	3	0	1	0	0	0	0	0	0	1	0	0	0	0
>k141_1273579	384	1	0	1	0	0	0	0	0	0	0	0	0	0	0	0	0	8	0	0	0	0	0	0	0	0	0	0	0	0	0	0	0	0	0	0
>k141_1273642	291	6	0	0	0	0	0	0	0	0	0	0	0	0	0	0	0	0	0	0	0	0	0	0	0	0	0	0	0	0	0	0	0	0	0	0
>k141_1273954	558	0	0	0	2	0	0	0	0	0	0	0	0	0	0	2	0	0	0	0	0	4	0	0	0	0	0	0	0	0	0	0	0	0	0	0
>k141_1275210	303	2	0	0	0	0	0	0	2	0	2	1	0	0	0	0	0	0	0	0	0	0	0	0	0	0	0	0	0	2	0	0	2	0	0	2
>k141_1275853	2169	22	12	6	10	17	4	8	3	0	2	9	2	2	2	0	0	6	1	2	2	0	2	6	8	12	2	4	5	8	0	2	7	0	9	2
>k141_1276458	375	0	0	0	0	0	0	0	0	0	0	0	2	0	0	2	0	0	2	0	0	5	4	0	0	0	0	0	0	3	0	0	1	2	0	0
>k141_1276995	348	0	0	0	0	0	0	0	2	0	0	0	0	2	0	0	0	0	0	0	0	2	0	0	0	0	0	0	0	0	0	0	0	8	0	0
>k141_1277001	294	3	2	0	2	0	0	0	0	0	0	0	0	0	0	0	0	0	0	0	0	0	0	0	0	0	0	0	0	0	0	0	0	0	0	0
>k141_1277311	321	0	0	0	0	0	0	2	0	0	0	0	0	0	0	0	2	2	0	2	0	0	0	0	0	0	0	2	0	0	0	0	0	0	0	0
>k141_1277713	216	0	0	0	0	0	0	0	0	0	0	0	0	0	3	6	0	0	0	0	0	0	0	0	0	0	0	0	0	0	0	0	0	0	0	0
>k141_1278265	312	0	0	0	0	0	0	0	0	0	0	0	0	4	4	0	0	0	0	0	0	0	0	0	0	0	0	0	0	0	0	0	0	2	0	0
>k141_1279001	3693	3	6	1	5	15	3	1	2	1	1	4	4	3	11	6	30	19	9	17	9	4	13	44	31	13	2	20	4	2	20	2	4	3	19	2
>k141_1279663	654	0	0	0	0	0	0	0	0	0	0	0	0	0	0	0	0	1	1	0	4	12	1	2	1	0	0	0	0	9	0	0	7	0	0	0
>k141_1280375	366	1	0	0	2	0	0	0	0	0	0	1	0	1	2	0	2	0	0	0	0	2	1	0	0	0	0	0	0	2	0	0	0	0	0	0
>k141_1280611	1239	0	0	0	0	0	0	0	0	0	0	0	0	17	0	0	13	7	4	0	0	10	60	0	2	0	0	0	0	0	0	0	0	0	0	0
>k141_1280860	2181	129	0	0	4	0	0	17	3	0	0	2	7	20	0	64	10	2	3	0	0	82	11	0	11	2	0	0	0	69	0	0	21	45	0	2
>k141_1281523	420	0	0	0	0	0	0	0	0	0	0	0	0	0	0	0	0	0	0	0	0	0	0	0	0	0	0	1	0	0	0	0	6	2	0	0
>k141_1281683	516	0	0	0	0	0	0	0	0	0	0	0	0	0	0	14	0	0	0	0	0	0	0	0	0	0	0	0	0	0	0	0	0	0	0	0
>k141_1282640	369	0	0	0	0	0	0	7	0	0	0	0	0	0	0	1	0	0	0	0	0	0	0	0	0	0	0	0	0	0	0	0	0	0	0	0
>k141_1282863	378	0	0	0	0	0	0	0	0	0	0	0	0	1	0	0	0	0	0	1	0	0	14	0	2	0	0	0	0	2	0	0	0	0	2	0
>k141_1283153	501	0	0	0	0	2	0	0	2	0	2	6	0	2	0	4	0	0	0	0	0	0	3	0	0	0	0	0	0	0	2	0	1	2	0	0
>k141_1284448	570	2	0	0	0	0	0	0	0	0	0	0	0	0	2	0	0	0	1	0	1	3	2	0	11	0	2	0	0	0	1	0	2	0	0	0
>k141_1284916	800	0	0	0	0	0	0	0	0	0	0	0	0	0	0	0	0	0	0	0	0	0	26	0	0	0	0	0	0	0	0	0	0	0	0	0
>k141_1284998	501	0	0	0	0	0	0	0	0	0	0	0	0	0	9	1	0	2	0	0	2	0	2	0	0	0	0	0	0	0	2	0	0	6	0	0
>k141_1285759	657	0	0	0	0	0	0	0	0	0	0	0	0	0	0	0	2	0	2	0	2	5	0	0	0	0	0	0	1	3	0	0	1	5	0	1
>k141_1285943	405	3	0	0	0	0	0	0	0	0	0	0	0	0	0	7	1	1	0	0	0	2	0	0	0	0	0	0	0	2	0	0	2	2	0	2
>k141_1286024	591	0	0	0	0	0	0	0	0	0	0	0	0	4	0	2	0	0	0	0	0	4	0	0	2	0	0	0	0	3	0	0	0	7	2	0
>k141_1286390	390	0	0	0	0	0	0	0	0	0	0	0	0	0	0	0	0	0	0	0	0	0	2	0	0	0	0	0	0	4	0	0	0	4	0	2
>k141_1286741	600	0	0	0	0	0	0	0	6	0	2	2	0	0	0	2	0	0	0	0	0	1	0	0	2	0	0	0	0	6	1	0	2	0	0	2
>k141_1286784	588	0	0	0	0	0	0	0	0	0	1	0	0	0	12	0	0	0	0	0	2	0	0	0	0	0	1	0	0	0	0	0	0	5	0	0
>k141_1286825	321	3	2	0	2	5	0	4	0	4	2	4	0	0	1	0	0	2	0	0	0	0	1	0	0	5	1	0	0	0	3	0	0	2	0	2
>k141_1287512	480	0	0	0	0	0	0	0	0	0	0	0	0	0	0	1	0	2	0	0	0	0	6	0	0	0	0	0	0	2	2	0	0	0	0	0
>k141_1287719	321	0	0	0	0	0	0	0	0	0	0	0	0	0	0	0	0	0	0	0	0	0	0	0	0	0	0	0	2	2	0	0	0	0	0	0
>k141_1288378	330	2	0	0	0	0	0	0	0	0	0	2	0	0	2	0	0	0	0	0	0	0	0	0	0	0	0	0	0	0	0	0	0	3	0	0
>k141_1290756	623	2	2	0	2	5	2	1	0	7	2	0	1	0	0	0	0	2	0	3	0	0	0	0	0	1	0	0	0	0	0	0	0	0	4	0
>k141_1291584	2166	1	0	10	2	6	14	4	0	0	16	19	4	0	0	0	0	0	4	0	0	0	2	10	8	0	0	2	0	0	0	0	2	0	0	0
>k141_1291633	345	0	0	0	0	0	0	0	0	0	0	0	0	2	0	0	0	0	0	0	0	0	0	0	0	0	0	0	0	0	0	0	0	4	0	0
>k141_1292678	384	0	0	0	0	0	0	0	0	0	0	0	0	0	0	0	0	0	2	0	0	1	0	0	1	0	0	0	4	2	0	0	2	4	0	0
>k141_1292894	696	0	0	0	0	0	0	2	2	0	0	0	0	0	4	2	2	0	1	3	0	1	1	5	0	0	2	2	11	4	1	1	2	4	0	0
>k141_1293186	912	2	4	0	0	8	1	2	0	0	0	3	0	0	1	0	0	0	0	2	0	0	0	0	0	0	0	2	0	1	0	0	0	0	0	0
>k141_1293980	303	0	0	0	0	0	0	0	0	0	0	0	0	0	0	0	0	0	0	0	0	0	0	3	2	0	0	0	0	0	0	0	0	0	0	0
>k141_1294534	525	0	0	0	0	0	0	0	0	0	0	1	0	0	0	1	0	0	0	0	0	4	2	0	6	0	0	0	2	0	0	0	0	0	0	4
>k141_1295122	660	0	0	2	0	0	0	0	0	0	0	8	0	0	0	0	0	2	0	0	0	0	4	0	0	0	0	0	0	0	2	0	0	0	0	0
>k141_1295362	393	0	0	0	0	0	0	2	2	2	0	0	0	0	0	0	0	0	2	0	0	0	0	0	0	0	0	0	0	0	0	2	0	0	0	0
>k141_1295384	3318	189	4	9	102	2	0	21	0	0	0	0	0	6	6	6	0	0	0	0	0	0	0	0	2	0	0	0	0	34	0	0	4	236	0	0
>k141_1298157	333	0	0	0	0	0	0	0	0	0	0	0	0	0	0	0	0	0	0	0	0	0	4	0	0	0	0	0	0	0	2	0	0	0	0	2
>k141_1299594	1293	3	16	3	5	22	11	0	0	11	3	1	6	0	7	3	0	4	1	7	1	2	0	0	0	7	3	4	4	2	4	2	3	4	13	1
>k141_1299961	1848	0	0	0	0	0	0	0	0	0	4	3	0	0	3	0	0	0	0	0	4	2	14	14	4	0	0	16	8	6	4	0	2	0	6	0
>k141_1300382	1080	6	0	0	7	0	0	0	0	0	6	8	2	4	0	8	0	0	4	2	0	2	5	0	10	0	0	0	4	16	0	0	12	6	0	4
>k141_1300756	465	0	0	0	0	0	0	0	0	0	0	2	0	0	2	0	0	0	0	0	0	0	0	0	0	0	0	0	0	0	0	2	0	0	0	0
>k141_1301030	725	13	0	0	0	0	0	4	0	0	0	0	0	0	0	4	0	0	0	0	0	1	0	0	0	0	0	0	0	10	0	0	2	5	0	0
>k141_1301556	312	0	0	0	0	0	0	0	0	0	0	0	0	0	0	0	0	0	0	0	0	0	0	0	0	0	0	0	0	2	0	0	0	0	0	2
>k141_1302316	381	2	0	0	2	0	0	0	0	0	2	0	0	1	0	1	0	0	0	0	0	4	0	0	0	0	0	0	0	2	0	0	0	7	0	0
>k141_1302581	1824	4	0	0	0	0	0	6	0	0	0	0	0	2	0	23	0	0	0	0	0	15	0	0	6	0	0	0	2	4	4	0	12	8	0	5
>k141_1302915	381	1	0	0	0	0	0	0	0	0	0	0	0	0	0	0	0	0	0	0	0	2	0	0	0	0	0	0	2	3	0	0	0	1	0	0
>k141_1303399	504	1	0	0	2	1	0	0	0	1	1	0	2	0	1	2	2	0	2	0	2	6	5	0	1	1	0	0	1	2	4	0	0	6	0	1
>k141_1303451	432	0	1	0	0	0	0	0	0	0	0	0	0	0	0	0	0	0	0	0	0	0	2	0	0	0	0	0	0	4	0	0	0	8	0	1
>k141_1303456	405	0	0	0	0	2	0	0	0	1	2	3	1	0	0	1	1	1	0	1	0	2	4	2	6	2	0	2	1	2	8	0	0	2	2	0
>k141_1305124	402	0	0	0	3	0	0	0	0	2	0	0	0	0	0	0	0	0	0	2	0	0	0	2	0	0	0	0	0	1	0	0	0	2	0	2
>k141_1305801	414	0	0	0	0	0	0	0	1	0	0	0	0	0	0	0	0	0	0	0	0	2	0	0	0	0	0	0	0	0	0	0	0	1	0	0
>k141_1306857	717	0	0	2	2	0	0	1	0	0	0	0	0	2	0	2	2	0	0	0	4	3	6	4	4	0	0	0	2	5	0	0	2	1	0	0
>k141_1307098	846	0	0	0	0	0	0	0	0	0	2	0	0	2	7	2	0	2	0	0	2	1	6	0	2	0	0	0	2	2	0	0	2	6	2	0
>k141_1308021	480	0	0	0	0	0	0	0	0	0	0	0	0	0	0	8	0	0	0	0	0	0	0	0	0	0	0	0	0	1	0	0	0	23	0	0
>k141_1308873	336	3	0	0	0	0	0	0	0	0	0	0	0	0	0	3	0	0	1	0	2	5	0	0	0	0	0	0	0	3	2	0	2	1	0	1
>k141_1309365	621	2	0	0	0	0	0	0	3	0	4	0	0	0	2	2	0	0	2	0	0	0	0	0	0	0	2	0	0	0	0	0	0	2	0	0
>k141_1309568	1233	11	0	1	0	0	0	0	0	0	0	0	0	0	0	2	0	0	0	0	0	2	5	4	8	0	1	0	1	1	4	0	2	2	1	0
>k141_1309703	483	0	0	0	0	0	0	0	0	0	0	0	0	2	2	0	0	0	0	0	0	0	2	0	0	0	0	0	4	1	0	0	0	5	0	0
>k141_1309954	432	0	0	0	0	0	0	0	0	0	0	0	0	0	0	1	0	0	0	0	0	0	3	0	0	0	0	0	0	0	2	0	0	2	0	0
>k141_1310746	597	0	0	0	0	0	0	0	0	0	0	0	0	0	7	8	1	0	0	0	6	9	5	0	4	0	0	0	3	0	2	0	0	15	0	3
>k141_1310922	642	0	0	0	2	1	1	0	0	0	0	0	0	2	2	4	0	0	0	0	0	0	0	0	3	0	0	0	0	0	0	0	0	4	0	2
>k141_1312150	426	2	0	0	0	0	0	0	4	0	0	0	0	0	0	1	0	0	0	0	0	3	1	0	0	0	0	0	0	0	0	0	6	1	0	0
>k141_1312259	267	0	0	0	1	0	0	0	0	0	0	0	1	2	0	2	0	0	0	0	0	2	0	0	0	0	0	0	0	0	2	0	0	4	2	0
>k141_1313648	1761	2	0	0	0	0	0	0	0	0	0	0	0	0	4	5	6	9	10	6	0	11	13	21	5	0	0	0	3	4	1	0	5	12	0	1
>k141_1314073	426	0	0	0	0	0	0	0	0	0	0	1	0	2	0	4	2	0	0	1	0	0	2	0	4	0	0	0	0	3	0	0	0	0	0	0
>k141_1315068	363	0	0	0	0	0	0	0	0	0	0	0	0	0	0	2	0	0	2	0	0	4	0	0	0	0	0	0	0	0	0	0	2	0	0	0
>k141_1315177	327	1	0	0	0	0	0	0	0	0	0	0	0	0	0	0	0	0	0	1	0	1	0	0	0	0	0	0	0	0	0	0	0	1	4	0
>k141_1315443	468	0	0	0	0	0	0	0	0	0	0	1	2	0	1	1	0	0	0	0	0	11	2	0	0	0	0	0	0	0	2	0	0	1	0	0
>k141_1315700	810	13	1	0	0	0	0	4	0	0	0	0	0	5	0	7	0	0	0	0	0	3	0	0	0	0	0	0	0	3	0	0	0	0	0	0
>k141_1316487	648	0	0	0	0	0	0	0	0	0	4	0	0	0	2	2	0	2	0	0	0	12	2	0	0	0	0	0	0	2	0	0	0	5	0	1
>k141_1318615	213	3	0	0	0	0	0	0	0	0	0	0	0	2	0	2	0	0	0	0	0	0	0	0	0	0	0	0	0	1	0	0	0	0	0	1
>k141_1318939	735	0	0	0	0	0	0	0	0	0	0	0	0	0	0	0	0	0	2	0	0	1	37	2	0	0	0	0	0	0	0	0	0	0	0	0
>k141_1319153	297	0	2	1	0	2	0	0	0	0	0	0	0	0	0	3	0	0	0	0	0	0	0	0	0	0	0	0	0	0	0	0	0	0	0	0
>k141_1319709	513	0	0	0	0	4	0	0	2	0	0	1	0	0	0	6	0	0	0	0	0	4	0	1	0	0	0	0	0	2	5	0	0	1	0	0
>k141_1320161	474	0	0	2	0	0	0	0	0	2	0	2	0	0	2	0	0	0	0	0	0	0	0	0	0	0	0	0	0	0	2	2	0	0	4	2
>k141_1320168	699	1	2	0	0	1	1	5	2	0	0	0	1	0	5	3	0	3	0	0	0	5	4	4	3	0	1	2	3	0	3	0	0	2	0	0
>k141_1320275	792	1	0	0	0	0	0	0	2	0	0	0	0	8	1	9	0	0	0	0	0	12	0	2	0	0	0	0	0	2	0	0	0	3	2	1
>k141_1321616	576	1	0	0	0	0	0	0	0	0	0	2	0	3	0	2	2	4	3	0	0	4	17	1	7	0	0	0	2	0	0	0	8	0	2	0
>k141_1322838	363	1	2	0	0	3	1	0	0	0	0	0	0	0	0	0	0	2	0	0	0	1	0	0	0	0	0	0	0	0	0	1	0	0	0	0
>k141_1323628	675	0	0	0	0	0	0	0	0	0	0	0	0	0	0	0	2	0	2	2	2	0	0	3	0	0	0	0	0	0	0	0	0	1	0	0
>k141_1323659	555	1	0	0	1	0	0	2	0	0	0	3	0	0	0	4	0	0	2	0	0	0	9	0	4	0	0	0	0	2	0	0	2	0	0	0
>k141_1324892	534	0	0	0	0	0	0	0	0	0	0	0	0	0	0	0	2	0	0	0	0	7	0	0	0	0	0	0	0	0	0	0	0	4	0	0
>k141_1325993	372	0	0	0	0	0	0	0	0	0	0	0	0	0	0	0	0	2	0	0	0	2	0	0	4	0	0	0	0	5	0	0	0	0	0	0
>k141_1328055	1587	0	0	0	0	6	0	0	4	0	0	2	2	0	0	38	4	4	1	0	4	37	15	2	6	0	2	0	10	4	3	0	4	8	0	0
>k141_1328690	306	0	0	0	0	0	0	2	0	0	0	0	0	0	0	0	0	0	0	0	0	0	0	0	0	0	0	0	0	0	0	0	2	2	0	0
>k141_1328844	345	33	31	32	58	46	33	31	20	25	23	45	53	43	55	0	1	16	5	13	0	1	1	7	1	3	2	3	3	1	5	4	6	5	40	12
>k141_1328846	318	0	0	0	0	0	0	0	4	0	0	0	0	0	4	0	0	0	0	0	0	0	1	0	0	0	0	0	0	0	0	0	0	0	0	0
>k141_1329125	429	3	0	0	0	0	0	0	0	0	0	0	0	1	0	11	0	0	2	0	2	5	0	0	0	0	0	0	0	0	0	0	0	0	0	1
>k141_1330467	375	2	0	0	0	0	0	6	0	0	0	0	0	0	0	0	0	0	2	0	0	0	0	0	0	0	0	0	1	0	1	0	0	7	0	0
>k141_1331162	564	0	0	0	0	0	0	0	0	0	0	0	0	0	0	0	0	0	0	0	0	0	5	6	0	0	0	0	0	4	0	0	0	5	0	0
>k141_1331413	498	0	0	0	0	0	0	0	0	0	0	0	0	0	0	1	2	0	0	0	2	2	0	0	0	0	0	0	0	0	0	0	1	0	0	4
>k141_1331433	519	0	0	0	0	0	0	0	0	0	0	0	0	0	0	0	0	0	2	0	0	0	0	0	0	0	0	0	0	0	0	0	14	0	0	0
>k141_1331505	321	1	2	0	1	0	0	2	0	1	0	0	2	0	0	0	0	0	0	0	0	0	0	0	0	0	0	0	0	0	0	0	0	0	0	0
>k141_1331819	381	0	0	0	0	0	0	0	0	0	0	0	2	0	1	5	0	0	0	0	0	5	0	0	0	0	0	0	0	0	0	0	0	4	0	0
>k141_1332119	567	0	0	0	0	6	0	0	0	0	0	1	0	0	0	2	2	0	0	0	0	1	0	2	0	1	0	0	0	0	0	1	0	0	0	0
>k141_1332517	480	1	0	0	2	0	0	0	0	0	2	2	0	0	0	0	0	0	0	3	0	0	2	0	0	0	0	0	0	0	0	0	0	0	0	0
>k141_1332910	864	3	0	0	0	0	0	3	0	0	0	0	4	0	0	1	0	2	0	0	0	1	2	2	7	0	2	0	0	5	2	0	0	4	2	1
>k141_1333581	507	0	0	0	0	0	1	0	0	0	0	2	0	2	0	5	0	0	1	0	0	7	0	0	0	0	0	0	0	4	0	0	0	1	1	0
>k141_1334224	612	1	0	0	0	0	0	0	0	0	1	0	0	2	0	6	0	0	0	0	5	10	0	0	0	0	0	0	1	0	0	0	1	4	0	1
>k141_1334892	3924	0	2	0	0	0	0	0	2	0	0	0	0	0	0	0	17	8	24	4	6	0	29	51	64	17	14	252	51	3	34	4	6	0	8	4
>k141_1335510	504	0	0	0	0	0	0	0	0	2	0	0	1	2	0	2	0	0	0	0	0	6	0	0	1	0	0	0	0	0	2	0	4	0	0	0
>k141_1336186	615	0	0	0	0	2	0	0	1	0	0	0	2	0	0	1	0	1	0	0	0	2	0	2	0	2	0	0	0	0	1	0	0	0	0	0
>k141_1337049	453	0	0	0	0	0	0	0	0	0	0	0	0	0	5	5	0	0	0	0	0	4	1	0	0	0	0	0	0	0	0	0	0	4	0	0
>k141_1337146	381	0	0	2	1	0	0	0	0	0	2	0	0	0	0	0	0	0	0	0	2	2	4	0	0	0	0	0	0	2	2	2	0	0	0	0
>k141_1337263	366	0	0	0	0	0	0	0	0	0	0	0	0	0	0	0	1	0	1	0	4	0	0	0	4	0	0	0	0	5	0	0	4	0	0	1
>k141_1338230	1086	1	0	0	0	2	0	2	0	0	0	0	0	4	2	6	0	0	0	0	0	4	2	0	0	0	0	0	0	0	0	0	0	47	0	0
>k141_1338740	1539	2	0	0	0	0	0	0	0	0	0	0	0	0	0	0	0	0	0	0	0	0	0	0	0	0	0	0	0	0	0	0	0	78	0	0
>k141_1339517	687	1	0	0	0	0	0	0	0	0	0	0	0	1	0	12	0	0	0	0	0	4	1	0	0	0	0	0	0	0	0	0	0	33	0	0
>k141_1339603	420	0	0	0	0	0	0	0	0	0	1	0	0	0	0	3	0	0	0	0	2	0	0	0	2	0	0	0	0	6	0	0	0	0	0	0
>k141_1339658	336	0	0	0	0	0	0	0	0	0	0	1	0	0	2	2	0	0	0	0	1	3	0	0	0	1	1	0	1	0	0	0	0	0	0	0
>k141_1340282	324	0	0	0	0	0	0	0	0	0	1	0	0	0	0	0	0	0	0	0	0	0	0	0	0	0	0	0	0	8	0	0	0	0	0	0
>k141_1340664	309	0	0	0	0	0	0	0	2	0	0	0	0	2	0	5	0	0	0	0	0	4	0	0	0	0	0	0	0	2	0	0	0	0	0	0
>k141_1342305	405	0	0	0	0	0	0	0	0	0	0	0	0	1	0	0	0	0	2	0	0	9	0	0	4	0	0	0	0	4	0	0	1	0	0	0
>k141_1342458	393	0	0	0	0	0	0	0	0	0	0	0	2	2	7	1	0	0	0	0	0	1	0	0	0	0	0	0	0	0	0	0	0	5	0	0
>k141_1342937	765	2	0	0	0	15	2	0	0	1	1	0	0	1	2	6	0	0	0	0	0	3	0	0	0	2	0	0	2	0	2	0	0	0	2	0
>k141_1344522	2382	0	1	2	0	0	0	0	1	0	5	16	0	10	23	0	0	2	2	2	0	4	5	0	2	0	6	0	2	4	11	11	7	3	25	0
>k141_1344806	528	0	0	0	0	0	0	0	0	0	0	0	0	0	0	2	0	0	0	0	0	12	0	0	0	0	0	0	0	0	0	0	0	0	0	0
>k141_1345442	333	0	0	0	0	0	0	0	0	0	0	0	0	0	0	0	0	0	0	0	0	2	0	0	0	0	0	0	0	0	0	0	0	2	0	0
>k141_1346299	996	4	0	2	1	0	0	1	0	0	2	4	0	0	0	3	0	2	0	0	0	5	7	0	0	0	0	0	0	0	2	0	3	4	0	0
>k141_1347837	390	0	0	0	2	0	0	0	1	0	0	0	0	0	0	0	0	0	0	0	0	0	2	0	2	0	0	0	0	0	0	4	0	0	0	0
>k141_1349702	369	0	0	0	0	0	0	0	0	0	0	0	0	0	0	0	0	0	0	0	0	0	2	0	2	0	0	0	0	0	0	0	0	0	0	0
>k141_1349827	492	0	0	0	0	0	0	0	0	0	0	0	0	0	0	0	2	2	0	2	0	0	0	0	0	2	2	0	3	0	2	0	0	1	0	0
>k141_1349949	447	2	0	0	0	0	4	0	0	0	0	0	2	0	0	11	0	0	0	0	0	6	0	0	0	0	0	0	1	0	0	0	2	0	0	0
>k141_1349964	330	0	0	0	0	0	0	0	0	0	2	0	0	0	2	0	0	0	0	0	0	0	0	0	0	0	0	0	0	0	0	0	0	0	0	0
>k141_1350943	594	0	0	0	0	1	0	0	0	0	0	0	0	2	2	1	0	0	0	0	2	4	0	0	2	0	2	0	0	4	0	1	0	2	1	1
>k141_1351178	369	0	0	0	0	0	0	0	0	3	2	3	0	0	0	0	0	0	0	1	0	0	0	0	0	0	0	0	0	0	0	2	1	0	0	1
>k141_1351820	336	0	0	0	0	0	0	0	0	0	0	0	0	0	0	0	0	0	0	0	0	0	0	0	0	0	0	2	2	0	0	2	0	0	0	0
>k141_1351902	396	1	0	0	0	0	0	0	0	0	0	0	0	0	0	0	0	0	0	0	0	7	1	0	0	0	0	0	0	0	0	0	0	0	0	0
>k141_1352955	279	4	0	0	0	0	0	1	0	0	0	0	0	2	0	8	0	0	0	0	0	2	1	0	3	0	0	0	0	14	0	0	2	2	0	0
>k141_1353675	363	0	0	0	0	0	0	0	1	0	0	0	0	2	2	0	0	0	0	0	0	2	0	0	0	0	0	0	0	0	0	0	0	0	0	0
>k141_1353687	1272	4	1	0	5	0	0	0	1	0	2	1	0	0	3	5	9	4	13	0	8	30	7	0	12	0	0	0	2	16	8	0	14	4	0	5
>k141_1353777	1389	0	0	0	0	0	0	0	0	0	0	0	0	0	0	2	0	0	0	2	0	110	0	0	0	0	0	0	0	0	1	0	0	0	0	0
>k141_1354417	687	0	1	0	0	0	0	0	0	0	4	2	0	2	3	6	0	2	0	0	0	7	4	0	3	0	1	0	0	0	1	0	4	2	0	2
>k141_1354551	930	0	0	2	0	4	0	0	1	10	1	0	0	0	1	0	0	0	4	2	0	2	0	0	2	1	5	0	2	1	0	4	7	0	4	0
